# Supplementary material for: The cis-regulatory effects of modern human-specific variants
Source: eLife. 2021 Apr 22;10:e63713. doi: 10.7554/eLife.63713 (PMC8062137; doi:10.7554/eLife.63713)
Supplement: Supplementary file 3. [file elife-63713-supp3.xlsx]

## Sheet: supplementary file 3a
Supplementary Table 3. FIMO predicted transcription factor binding alterations
sequence ID	TFs with FIMO score differences	TFBS FIMO score differences	which allele mapped	ancestral FIMO q-values	derived FIMO q-values
libB_seq57029_[chr1:1136106-1136305]	PATZ1,PRDM9,SP1,VEZF1,ZNF263,ZNF467	-0.10559999999999903,-1.2336500000000008,-6.927859999999999,-0.09090999999999916,4.04122,2.055550000000001	both+both,both+both,both+both,ancestral+ancestral,derived+derived,derived+derived	0.0287,0.0348,0.0327,0.0341,1,1	0.0295,0.0447,0.0787,1,0.0414,0.0233
libA_seq229534_[chr1:1197948-1198147]	ZNF341	1.8033	both	0.0408	0.028
libB_seq264324_[chr1:1203069-1203268]	CTCF,ZNF180,ZNF283,ZNF341	2.0619000000000014,1.9166700000000017,2.7406999999999986,1.6966999999999999	both,derived,both+both,derived	0.0532,1,0.0481,1	0.0272,0.05,0.0412,0.0383
libB_seq75291_[chr1:1500965-1501164]	MAZ,ZNF341,ZNF548	-0.12143000000000015,-2.536100000000001,1.0647999999999982	ancestral,ancestral,both	0.0309,0.0469,0.009609999999999999	1,1,0.00545
libA_seq35918_[chr1:1839919-1840118]	PATZ1,SP2,ZNF121,ZNF180,ZNF341,ZNF383	0.7042300000000008,0.834699999999998,-4.6297,2.8611000000000004,0.7786999999999988,4.02777	derived,both+both,both,both,derived,both	1,0.0366,0.0448,0.0309,1,0.0629	0.0408,0.0313,0.10800000000000001,0.017,0.0471,0.0385
libB_seq51614_[chr1:1847036-1847235]	MAZ,SP2	-0.6428599999999989,-1.958680000000001	ancestral,ancestral	0.0272,0.0447	1,1
libA_seq128936_[chr1:1865451-1865650]
libB_seq96124_[chr1:1870795-1870994]	HKR1,KLF15,MAZ,PATZ1,PRDM9,SP1,SP2,SP3,VEZF1,WT1,ZNF180,ZNF263,ZNF283,ZNF304,ZNF341,ZNF383,ZNF432,ZNF467,ZNF529,ZNF770,ZNF880	-0.270999999999999,-2.1546399999999997,-1.9214400000000005,-2.1972299999999994,-1.9720000000000013,-1.6185599999999996,-1.7934,-1.6851000000000003,-0.44849999999999923,-1.5877000000000017,-0.9352,-0.8367999999999984,-1.7777000000000012,-0.09339999999999904,-0.45081999999999844,-0.9074000000000009,-3.249999999999999,-0.9285000000000032,-1.48977,-1.3266000000000027,-0.27779999999999916	both,ancestral,ancestral+both,ancestral+ancestral,both,both+both,both+both,both+both,both+both,both+both,both,both+both,both,both,ancestral,both,both+both,both+both,both,both,both	0.0372,0.0408,0.0197,0.0289,0.0131,0.0484,0.0377,0.0307,0.0252,0.0168,0.0279,0.0369,0.0441,0.0063,0.0499,0.0359,0.0188,0.00307,0.0313,0.0052899999999999996,0.0034	0.0384,1,0.0317,1,0.0206,0.0592,0.0511,0.0448,0.0287,0.0226,0.0333,0.0449,0.0465,0.0063,1,0.0386,0.0318,0.0039299999999999995,0.0366,0.007890000000000001,0.00358
libB_seq161606_[chr1:2100640-2100839]	MAZ,PRDM9,SP2,WT1,ZNF180,ZNF341,ZNF467	0.9642999999999997,1.3364500000000001,3.0826800000000016,2.288639999999999,1.9444300000000005,-1.5245999999999995,1.408150000000001	both,derived,derived,both,both,ancestral,both+both	0.0249,1,1,0.0385,0.0507,0.04,0.0329	0.0194,0.0466,0.0373,0.0253,0.0368,1,0.0241
libA_seq139784_[chr1:2355646-2355845]
libB_seq257942_[chr1:3013683-3013882]
libB_seq147822_[chr1:3294188-3294387]	PRDM9	-2.458	both	0.0106	0.019
libA_seq250736_[chr1:4749975-4750174]	EGR1,EGR2,FLI1,HKR1,KLF15,KLF3,KLF6,MAZ,PATZ1,PRDM9,SP1,SP2,SP3,SP4,VEZF1,WT1,ZBTB17,ZBTB7A,ZNF180,ZNF263,ZNF281,ZNF304,ZNF341,ZNF383,ZNF432,ZNF444,ZNF467,ZNF529,ZNF530,ZNF548,ZNF770,ZNF774,ZNF880	3.4352,2.086299999999998,-2.0618999999999996,-5.93458,5.329849999999999,7.979369999999998,2.4590999999999994,-4.164300000000001,5.922600000000001,-1.7289999999999992,5.453599999999998,7.29895,-0.7963000000000022,3.213099999999997,-0.8606000000000016,-0.8557000000000023,0.2936000000000014,-7.031000000000001,-1.6851999999999983,-2.989799999999999,-9.886610000000001,3.0,-1.385200000000001,-6.6019000…	both,both+both,both+both,ancestral,derived+derived,derived,both+both,both+both,both+both,both+both,both+both,derived+derived,both+both,both+both,both+both,both+both,both+both,both,both+both,both+both,both+both,both,both+both,both+both,both+both,both+both,both+both,both+both,both,both,both+both,ancestral+both,both+both	0.0646,0.0156,0.0344,0.0372,1,1,0.0146,0.0015,0.0123,0.00107,0.0169,1,0.00983,0.015,0.00215,0.00492,0.009040000000000001,0.0446,0.005529999999999999,0.0035,0.0452,0.0109,0.0223,0.00733,0.000539,0.0134,0.00145,0.0201,0.0393,0.05,0.0285,0.0207,0.013000000000000001	0.0234,0.00909,0.0517,1,0.0445,0.0257,0.0087,0.00476,0.00197,0.00236,0.006509999999999999,0.0496,0.0123,0.0052,0.00298,0.00596,0.0088,0.17600000000000002,0.00925,0.0068200000000000005,0.14400000000000002,0.00476,0.0294,0.0155,0.0017699999999999999,0.0395,0.005529999999999999,0.0655,0.0723,0.12300000000000001,0.0285,0.0211,0.0182
libA_seq23576_[chr1:4988399-4988598]
libB_seq253954_[chr1:4988462-4988661]
libA_seq161661_[chr1:4988576-4988775]	ZNF467	-0.04081	ancestral	0.0373	1
libA_seq96566_[chr1:5356053-5356252]
libA_seq8101_[chr1:5356257-5356456]
libB_seq132505_[chr1:5358843-5359042]
libB_seq215567_[chr1:5405392-5405591]
libA_seq251904_[chr1:5564301-5564500]
libB_seq54058_[chr1:5791129-5791328]
libB_seq221362_[chr1:6244322-6244521]
libB_seq165124_[chr1:6561921-6562120]	EGR2,HKR1,KLF11,KLF15,KLF6,MAZ,PATZ1,PRDM9,SP1,SP2,SP3,VEZF1,WT1,ZBTB17,ZNF180,ZNF263,ZNF283,ZNF341,ZNF467,ZNF529,ZNF770	2.0863999999999994,-0.009399999999999409,7.030900000000001,-6.896899999999999,0.38780000000000214,-6.357099999999999,-4.605600000000001,-1.72898,4.46391,-2.223180000000001,-0.8241000000000014,-2.072749999999999,-4.70101,0.44040000000000035,-3.3148100000000014,-3.7142999999999997,-4.861099999999999,-1.0573999999999995,-3.4908,-9.64284,2.6530900000000006	both,both,both,both+both,ancestral+derived,both+both,ancestral+derived,both,derived+derived,ancestral+both,both+both,ancestral+ancestral,ancestral+both,both,ancestral,both+both,both,both+both,both+both,both,both	0.0331,0.0421,0.0819,0.00698,0.0489,0.0038299999999999996,0.0138,0.0362,1,0.0362,0.0199,0.0195,0.0204,0.0135,0.0404,0.00515,0.0465,0.0145,0.006490000000000001,0.0183,0.0587	0.019,0.0421,0.0425,0.0301,0.045,0.0223,0.0402,0.0509,0.0494,0.053,0.0233,1,0.0496,0.0125,1,0.013000000000000001,0.0809,0.0191,0.0147,0.0632,0.0381
libB_seq539_[chr1:6690246-6690445]	ZNF880	0.6944	both	0.0232	0.0203
libA_seq204604_[chr1:6690376-6690575]	FLI1,MAZ,PATZ1,SP2,VEZF1,ZNF263,ZNF467,ZNF880	-1.4846000000000004,0.47140000000000093,-0.9577000000000009,-4.50408,-0.18179999999999907,1.6530299999999993,-2.05556,0.41667000000000076	both,both+both,both+both,both,both,derived,both+both,derived	0.0281,0.0177,0.0268,0.0262,0.0284,1,0.0217,1	0.0398,0.0156,0.0337,0.057999999999999996,0.0297,0.033,0.0327,0.0389
libB_seq111110_[chr1:6695349-6695548]	PRDM9,SP2,ZNF383	1.5607499999999996,-1.45458,1.6852100000000014	derived,both,both	1,0.0387,0.053	0.0445,0.0497,0.0434
libB_seq14677_[chr1:6695389-6695588]	PRDM9,SP2,ZNF383	1.5607499999999996,-1.45458,1.6852100000000014	derived,both,both	1,0.0387,0.053	0.0445,0.0497,0.0434
libA_seq50132_[chr1:7361224-7361423]
libA_seq55866_[chr1:7531420-7531619]	ZNF529	-0.7551	both	0.0496	0.0536
libB_seq293363_[chr1:7568449-7568648]	SP1,ZNF180,ZNF263,ZNF467	1.6185600000000022,1.9444499999999998,0.3775499999999994,2.0555199999999996	both,both,both,both+both	0.0474,0.0594,0.0413,0.023	0.0394,0.0447,0.0384,0.015
libA_seq277645_[chr1:7619060-7619259]	FLI1,PRDM9,WT1,ZNF529	-0.5876000000000001,0.3644799999999986,-1.1030999999999995,-5.367349999999999	both,both,both,both	0.0496,0.0516,0.037000000000000005,0.0366	0.0571,0.0483,0.0449,0.069
libB_seq251999_[chr1:7853785-7853984]	FLI1	2.3814	both	0.0692	0.0421
libA_seq93733_[chr1:7862813-7863012]
libB_seq307673_[chr1:7863978-7864177]
libB_seq278458_[chr1:7871735-7871934]	PRDM9	1.36449	derived	1	0.0462
libB_seq265330_[chr1:7872919-7873118]
libB_seq271425_[chr1:7875444-7875643]	ZNF212	5.48979	both+both	0.0108	0.00319
libA_seq53818_[chr1:7877393-7877592]
libB_seq144994_[chr1:7886725-7886924]
libA_seq303451_[chr1:7904497-7904696]
libA_seq18675_[chr1:8029247-8029446]
libA_seq261891_[chr1:8043688-8043887]	PATZ1,ZNF263,ZNF341,ZNF432,ZNF467,ZNF880	0.35913999999999824,-3.56705,1.5983000000000018,1.7999999999999998,0.5925899999999995,-0.7314600000000002	both,both+both,both+both,both+both,both+both,both	0.0419,0.0402,0.0301,0.0382,0.0224,0.0273	0.0384,0.0763,0.022000000000000002,0.0287,0.0201,0.0315
libB_seq182949_[chr1:8054430-8054629]
libA_seq293360_[chr1:8056807-8057006]	EGR1,EGR2,KLF15,MAZ,PATZ1,PRDM9,SP1,SP2,SP3,SP4,VEZF1,WT1,ZBTB17,ZNF180,ZNF263,ZNF281,ZNF341,ZNF432,ZNF444,ZNF467,ZNF529,ZNF774,ZNF880	-4.638900000000001,-5.3309000000000015,-6.21645,-4.0928,-3.7394000000000016,-5.102760000000001,-7.69069,-1.0413000000000014,-3.3241000000000014,-4.4344,-4.703000000000001,-3.2680000000000007,-4.3027000000000015,-2.9815199999999997,-5.255100000000002,-8.76291,-1.9590000000000014,-3.4400000000000013,-9.371179999999999,-3.4898100000000003,-3.9693899999999993,-2.700000000000001,-5.925910000000001	both+both,both+both,ancestral+ancestral,both+both,both+both,ancestral,ancestral+ancestral,both+both,ancestral+both,ancestral+both,both+both,ancestral+both,both+both,both,both+both,both+both,both+both,both+both,both+both,both+both,both,both,ancestral+ancestral	0.0334,0.00886,0.036000000000000004,0.00281,0.006959999999999999,0.0215,0.0408,0.0311,0.0304,0.0324,0.00257,0.0156,0.005529999999999999,0.0287,0.00592,0.0208,0.0256,0.0126,0.0248,0.0122,0.0433,0.0406,0.0127	0.0964,0.0349,1,0.00821,0.0165,1,1,0.0377,0.0605,0.0724,0.0126,0.0298,0.0177,0.0483,0.0238,0.0806,0.0379,0.0241,0.0571,0.0275,0.0681,0.0728,1
libA_seq31082_[chr1:8064208-8064407]	ZNF341	1.5052	both+both	0.0544	0.0393
libB_seq227006_[chr1:8064270-8064469]	ZNF341	1.5052	both+both	0.0544	0.0393
libA_seq271117_[chr1:8070951-8071150]
libB_seq315294_[chr1:8074369-8074568]
libA_seq313129_[chr1:8075659-8075858]	MAZ,ZBTB17,ZNF263,ZNF432,ZNF467,ZNF880	-1.6570999999999998,1.2569,1.489700000000001,0.7200000000000006,3.111130000000001,-2.4907000000000004	both,both,both,both,ancestral+derived,both	0.0137,0.055999999999999994,0.0179,0.0364,0.0278,0.011000000000000001	0.0211,0.0412,0.012,0.0323,0.0147,0.0182
libA_seq210166_[chr1:8081689-8081888]
libA_seq98485_[chr1:8094326-8094525]
libB_seq1431_[chr1:8105679-8105878]
libA_seq64329_[chr1:8121493-8121692]
libA_seq252837_[chr1:8124682-8124881]
libA_seq234841_[chr1:8232089-8232288]
libA_seq116409_[chr1:8869384-8869583]
libB_seq77810_[chr1:8869418-8869617]
libA_seq82269_[chr1:8875025-8875224]
libB_seq16225_[chr1:8880084-8880283]
libB_seq249667_[chr1:8887208-8887407]
libA_seq305430_[chr1:9002429-9002628]	ZNF93	-1.9071	both	0.03	0.0417
libB_seq309978_[chr1:9088262-9088461]	MAZ,VEZF1,ZNF263	-1.1214700000000004,-0.5939499999999995,-3.8878000000000004	both,ancestral,both+both	0.0233,0.0299,0.00502	0.0308,1,0.013000000000000001
libA_seq229413_[chr1:9088392-9088591]	FLI1,ZNF770	5.546430000000001,-1.4432999999999971	derived,both	1,0.0338	0.031,0.0689
libB_seq233440_[chr1:9088395-9088594]	FLI1,ZNF770	5.546430000000001,-1.4432999999999971	derived,both	1,0.0338	0.031,0.0689
libB_seq193815_[chr1:9091558-9091757]
libA_seq262400_[chr1:9098754-9098953]	ZNF341	1.2131	derived	1	0.0431
libA_seq19409_[chr1:9099381-9099580]	EGR1,SP3,WT1	0.9073999999999991,-1.2222000000000008,-1.6700999999999997	both,both,both	0.0642,0.0436,0.0381	0.0491,0.0553,0.0508
libA_seq9301_[chr1:9099853-9100052]	ZNF529	0.4184	both	0.0198	0.019
libB_seq302245_[chr1:9100587-9100786]
libA_seq20318_[chr1:9101471-9101670]	ZNF383,ZNF93	-0.09259999999999913,0.5714000000000006	both,both	0.0432,0.0572	0.0434,0.0485
libA_seq287857_[chr1:9105364-9105563]
libA_seq155957_[chr1:9106462-9106661]
libA_seq56054_[chr1:9107328-9107527]
libA_seq308827_[chr1:9111870-9112069]
libA_seq218589_[chr1:9112370-9112569]	EGR2,FLI1,HKR1,KLF15,KLF3,KLF6,MAZ,PATZ1,PRDM9,SP1,SP2,SP3,SP4,VEZF1,WT1,ZBTB17,ZNF180,ZNF263,ZNF281,ZNF341,ZNF432,ZNF444,ZNF467,ZNF468,ZNF529,ZNF774,ZNF880	3.2517999999999994,1.2474000000000007,-0.0840999999999994,1.1752000000000002,1.3093000000000004,0.34699999999999953,3.007200000000001,-0.7184000000000008,1.9345999999999997,2.855649999999999,1.5537200000000002,1.5556,0.01640000000000086,2.6485000000000003,1.5876000000000001,-1.4495000000000005,3.9259000000000004,0.3572000000000024,0.7113000000000014,1.556700000000001,0.4900000000000002,8.5876,2.1…	both+derived,both,both,both+both,both,both,both+both,ancestral+both,both+both,both,both,both,both,both+both,both+both,both,both,both+both,both+both,both+both,both+both,both+both,both+both,both,both,both,both+both	0.0627,0.0492,0.0336,0.0281,0.0567,0.0404,0.00403,0.0311,0.0226,0.0851,0.0622,0.032,0.0297,0.00566,0.0248,0.0103,0.0512,0.00914,0.0452,0.0314,0.0258,0.0455,0.0128,0.0462,0.0409,0.0622,0.0262	0.0313,0.0379,0.0336,0.0224,0.0435,0.0358,0.0017,0.0365,0.0145,0.0482,0.0481,0.0238,0.0297,0.00217,0.0181,0.015,0.0259,0.00892,0.0452,0.0277,0.024,0.019,0.00763,0.0252,0.0559,0.0486,0.0206
libA_seq127010_[chr1:9112714-9112913]
libB_seq60398_[chr1:9323068-9323267]
libB_seq244111_[chr1:10521304-10521503]
libA_seq14269_[chr1:11714882-11715081]	SP2,ZNF283	-1.45458,-9.19443	both,both	0.0426,0.0366	0.0548,0.0923
libB_seq151522_[chr1:11887283-11887482]
libB_seq200750_[chr1:12683003-12683202]	VEZF1,ZBTB17,ZNF432	-1.9939400000000003,-2.7339699999999993,-0.6200000000000001	both,ancestral,both	0.0195,0.0313,0.0404	0.0341,1,0.0443
libB_seq308801_[chr1:14799653-14799852]	ZNF235	-0.8431	both	0.0268	0.0335
libA_seq40750_[chr1:15278314-15278513]	PRDM9	-9.0094	both	0.00288	0.0308
libA_seq108652_[chr1:15426240-15426439]
libB_seq68425_[chr1:15918950-15919149]	ZNF331	0.9794	both	0.0571	0.0421
libB_seq203449_[chr1:17470360-17470559]
libB_seq7371_[chr1:17556052-17556251]	ZNF432	2.23	both	0.0165	0.0104
libA_seq84546_[chr1:18184871-18185070]	ZNF487	9.41414	both	0.0889	0.0357
libA_seq200550_[chr1:18193572-18193771]
libA_seq242328_[chr1:18713732-18713931]	PATZ1	1.31685	both	0.0417	0.0309
libB_seq132593_[chr1:18716799-18716998]
libB_seq9964_[chr1:18717197-18717396]	ZNF263,ZNF467	1.4897800000000014,-3.592600000000001	both,both+both	0.0431,0.0097	0.0314,0.0212
libB_seq87145_[chr1:18781607-18781806]
libB_seq163021_[chr1:19130902-19131101]	VEZF1,ZNF432,ZNF444	0.5393499999999989,0.379999999999999,2.855670000000001	derived,both,both	1,0.0191,0.0643	0.0303,0.0181,0.0494
libA_seq34375_[chr1:19136451-19136650]	EGR1,EGR2,MAZ,PATZ1,PRDM9,VEZF1,WT1,ZBTB17,ZNF341,ZNF432,ZNF71,ZNF770	-1.75,0.5540000000000003,0.6071399999999993,-0.816930000000001,-2.4578999999999986,-1.1333000000000002,-0.9793900000000004,1.3302999999999994,-3.1884999999999994,-2.7699999999999996,-4.357800000000001,0.13269999999999982	both,both,derived,ancestral,both,both,ancestral+ancestral,both,both+both,both,both,both	0.0448,0.0445,1,0.0397,0.00164,0.0112,0.044000000000000004,0.0534,0.0239,0.0224,0.040999999999999995,0.0479	0.0652,0.0396,0.0275,1,0.00379,0.0158,1,0.0382,0.0466,0.0339,0.0607,0.0471
libA_seq270606_[chr1:19173796-19173995]
libA_seq194089_[chr1:19658708-19658907]
libA_seq34721_[chr1:20587247-20587446]
libA_seq102605_[chr1:20730159-20730358]
libB_seq61656_[chr1:22556141-22556340]	VEZF1,ZBTB17,ZNF212,ZNF398,ZNF467,ZNF774,ZNF823,ZNF880	-0.31516000000000055,-0.9816699999999994,5.14288,1.2782999999999998,-0.7653000000000008,-0.23629999999999995,-1.1760000000000002,-2.0925700000000003	ancestral,ancestral,both+both,both,ancestral+ancestral,both,both,both+both	0.0322,0.0489,0.00246,0.0472,0.0321,0.039,0.0445,0.0223	1,1,0.00059,0.031,1,0.040999999999999995,0.0636,0.0348
libB_seq75460_[chr1:23085781-23085980]
libB_seq120856_[chr1:23184477-23184676]
libA_seq100829_[chr1:24219492-24219691]
libB_seq313605_[chr1:25027170-25027369]	PATZ1,ZNF432,ZNF880	-2.4014299999999995,-3.0699999999999994,-1.037040000000002	ancestral,both,ancestral+ancestral	0.0274,0.0227,0.034	1,0.0363,1
libB_seq313916_[chr1:25027973-25028172]
libA_seq73591_[chr1:25029758-25029957]
libA_seq61909_[chr1:25031834-25032033]
libA_seq49310_[chr1:25036299-25036498]
libB_seq46795_[chr1:25395245-25395444]
libB_seq145568_[chr1:25396705-25396904]	ZNF774	-1.2909	both	0.0483	0.0621
libA_seq13662_[chr1:26348416-26348615]	THRB,ZNF93	1.4021000000000008,1.3572000000000006	both,both	0.0529,0.0444	0.0134,0.0344
libB_seq21961_[chr1:26370925-26371124]
libA_seq144421_[chr1:26371088-26371287]
libA_seq115677_[chr1:26375901-26376100]
libA_seq285384_[chr1:26376200-26376399]	ZNF93	-1.3072	both	0.0198	0.0233
libA_seq218926_[chr1:26376896-26377095]
libA_seq160885_[chr1:26423052-26423251]
libA_seq151678_[chr1:26569704-26569903]	ZNF263	-0.18367	ancestral	0.0451	1
libA_seq70013_[chr1:27425507-27425706]	MAZ,PATZ1,RREB1,ZBTB17,ZNF180,ZNF880	-0.5571000000000002,0.2605599999999999,-8.04126,-0.9632700000000014,-2.1574100000000005,-0.3055500000000011	both,derived,both,ancestral,ancestral,ancestral	0.017,1,0.044000000000000004,0.0492,0.0483,0.0396	0.0194,0.0455,0.0873,1,1,1
libB_seq5722_[chr1:27426657-27426856]	EGR2,MAZ,PATZ1,ZNF263,ZNF467,ZNF774,ZNF880	-1.9425000000000008,-1.2499699999999994,1.2393999999999998,1.9592299999999998,1.9629600000000016,1.0818999999999992,-1.3055699999999995	both,ancestral,both,derived,derived+derived,both,both+both	0.0381,0.0234,0.0227,1,1,0.051,0.0226	0.0571,1,0.0171,0.0307,0.0237,0.0396,0.0298
libB_seq212007_[chr1:27437070-27437269]	ZNF180	2.31482	derived	1	0.0469
libB_seq11457_[chr1:27538558-27538757]
libA_seq5861_[chr1:28437135-28437334]
libB_seq268446_[chr1:28438620-28438819]
libB_seq226452_[chr1:28440962-28441161]
libA_seq285418_[chr1:28443179-28443378]
libA_seq136035_[chr1:28443740-28443939]	ZNF235	-0.99996	ancestral	0.0366	1
libA_seq298566_[chr1:28445688-28445887]
libB_seq285128_[chr1:28479236-28479435]
libB_seq40100_[chr1:28483407-28483606]	FLI1,MAZ,PATZ1,PRDM9,SP2,VEZF1,ZNF341,ZNF383,ZNF432,ZNF467,ZNF529	1.2475000000000005,0.5500000000000007,0.09859000000000151,1.3644900000000009,2.45458,1.4060499999999987,2.0245999999999995,5.870400000000002,0.7400000000000002,0.25509999999999966,1.4897900000000002	both,derived,derived,derived,both,derived+derived,derived,both,both+derived,derived,both	0.0637,1,1,1,0.0606,1,1,0.0354,0.0328,1,0.0574	0.0493,0.0279,0.0472,0.0462,0.0399,0.0237,0.036000000000000004,0.0155,0.0294,0.0357,0.049
libB_seq150412_[chr1:28484436-28484635]
libB_seq208378_[chr1:28484459-28484658]
libB_seq62999_[chr1:28484510-28484709]
libB_seq152556_[chr1:28485465-28485664]	PRDM6,PRDM9,VEZF1,WT1,ZNF263,ZNF287,ZNF341,ZNF467,ZNF880	1.9029000000000007,0.8505000000000003,1.4484399999999997,2.082460000000001,1.2551000000000005,3.6052399999999984,1.2377000000000002,0.12963000000000058,0.9166700000000008	both,both,both+both,both,derived+derived,derived+derived,both,derived,derived	0.0462,0.0342,0.0329,0.0399,1,1,0.0488,1,1	0.0266,0.0291,0.0219,0.0271,0.0356,0.0154,0.0375,0.0343,0.035
libA_seq100748_[chr1:28487336-28487535]
libB_seq161067_[chr1:28488478-28488677]
libA_seq191009_[chr1:28488790-28488989]	ZNF93	-2.2214	both+both	0.0344	0.0485
libB_seq39660_[chr1:28488869-28489068]	ZNF93	-2.2214	both	0.0344	0.0485
libA_seq278359_[chr1:28489530-28489729]
libB_seq258948_[chr1:28489592-28489791]
libA_seq41279_[chr1:28489693-28489892]
libB_seq171132_[chr1:28489824-28490023]
libA_seq44367_[chr1:28490174-28490373]	ZNF320	-1.6701	both	0.0496	0.0658
libB_seq194985_[chr1:28493904-28494103]
libA_seq121052_[chr1:28600154-28600353]	PRDM9,ZNF880	-2.803699999999999,-0.6574100000000014	both,ancestral	0.0161,0.0372	0.0305,1
libB_seq239207_[chr1:28601577-28601776]
libB_seq140061_[chr1:28604495-28604694]
libA_seq299304_[chr1:28839954-28840153]
libA_seq3977_[chr1:29236657-29236856]
libB_seq80188_[chr1:29237127-29237326]
libB_seq146835_[chr1:29237623-29237822]
libB_seq61382_[chr1:29241705-29241904]
libA_seq10767_[chr1:29242390-29242589]
libA_seq222802_[chr1:29246651-29246850]
libB_seq307189_[chr1:29246658-29246857]
libA_seq22248_[chr1:29248712-29248911]
libA_seq3633_[chr1:29250607-29250806]
libA_seq31380_[chr1:29253247-29253446]
libA_seq62769_[chr1:29253979-29254178]
libA_seq56830_[chr1:29254663-29254862]
libA_seq170563_[chr1:29255351-29255550]
libA_seq29962_[chr1:29257744-29257943]
libA_seq178449_[chr1:29259057-29259256]
libA_seq136157_[chr1:29259874-29260073]
libB_seq300675_[chr1:29261186-29261385]	ZNF263	-0.78571	ancestral	0.0396	1
libB_seq101819_[chr1:29262701-29262900]
libB_seq45884_[chr1:29263176-29263375]
libA_seq273981_[chr1:29263762-29263961]
libB_seq216762_[chr1:29270854-29271053]
libA_seq292817_[chr1:29275873-29276072]	ZSCAN16	0.0784	both	0.00792	0.00771
libA_seq5656_[chr1:29292869-29293068]
libA_seq122563_[chr1:30162215-30162414]	KLF6,PATZ1,SP3,ZNF180,ZNF304,ZNF341,ZNF383,ZNF432,ZNF467,ZNF529	2.2041000000000004,1.3169000000000004,1.4444,4.35186,1.8971999999999998,1.5410000000000004,5.8703899999999996,-0.04999999999999982,0.9489799999999988,1.1735000000000007	both,both,both,both,both,both+both,both+both,both+both,both+both,both	0.0712,0.0353,0.0647,0.0548,0.0446,0.0482,0.0653,0.0339,0.0339,0.0227	0.0425,0.0257,0.0498,0.0261,0.03,0.0347,0.0353,0.0342,0.0278,0.0191
libA_seq133899_[chr1:30403398-30403597]	HKR1,MAZ,PATZ1,PRDM9,RBAK,VEZF1,WT1,ZNF263,ZNF341,ZNF432,ZNF467,ZNF529,ZNF774,ZNF785,ZNF816,ZNF880	1.5701,1.2356999999999978,0.10562999999999967,-0.18689999999999962,-2.1927000000000003,1.7090999999999994,1.267999999999999,2.4898000000000025,4.254099999999999,2.9399999999999995,1.8704,-1.9082000000000008,-0.454600000000001,-1.814433,-0.13400000000000034,0.4074100000000014	both,both+both,derived,both+both,both,both+both,both,both+both,both+both,both,both+both,both+both,both,both,both,derived	0.0335,0.00439,1,0.0135,0.0476,0.0135,0.0234,0.00286,0.021,0.0146,0.0048,0.0118,0.0399,0.0388,0.0464,1	0.0272,0.00313,0.0471,0.0141,0.0766,0.00798,0.0184,0.00128,0.00824,0.00755,0.00292,0.0153,0.0438,0.0534,0.0471,0.0389
libB_seq228462_[chr1:30443281-30443480]
libB_seq212038_[chr1:30485264-30485463]	FLI1	9.91753	both	0.113	0.0489
libA_seq10209_[chr1:35309527-35309726]	ZNF768	-5.0825	both	0.0285	0.084
libA_seq191540_[chr1:36573877-36574076]	SP1,SP3,SP4	2.28871,2.1852,1.1557999999999993	both,both,both	0.0472,0.0501,0.0503	0.0339,0.031,0.0403
libB_seq165984_[chr1:36860297-36860496]	CTCF,ZNF182,ZNF225,ZNF235,ZNF287,ZNF384,ZNF487	-1.0686,-4.078900000000001,-9.41418,-0.4117999999999995,-0.9122999999999983,-2.3627000000000002,-5.1414100000000005	ancestral+both,ancestral+both,both,both+both,both+both,both+both,both+both	0.0187,0.0396,0.0473,0.0172,0.00349,0.0236,0.0352	0.0376,0.125,0.121,0.0195,0.0046,0.092,0.0588
libB_seq313296_[chr1:38302519-38302718]	EGR1,EGR2,FLI1,KLF10,KLF15,KLF3,KLF5,KLF6,MAZ,PATZ1,PRDM9,RXRA,SP1,SP2,SP3,SP4,VEZF1,WT1,ZBTB17,ZBTB7A,ZNF180,ZNF263,ZNF281,ZNF304,ZNF341,ZNF432,ZNF444,ZNF467,ZNF484,ZNF529,ZNF530,ZNF71,ZNF740,ZNF770,ZNF880	-8.000000000000002,-6.8201,-1.4742000000000015,-9.7526,-5.051600000000002,-5.175299999999998,-5.608219999999999,-3.3774999999999995,-4.0929,-2.4155000000000015,0.2430000000000021,-5.6572,-9.484489999999997,-9.3092,-5.787000000000001,-4.385200000000001,2.7394,-2.5052000000000003,-4.2844000000000015,-8.46394,-4.916600000000001,-2.4694000000000003,-9.072099999999999,-4.3271000000000015,-3.6721000000…	ancestral+ancestral,both,both,both,both+both,ancestral+both,ancestral,both+both,both+both,both+both,both+both,ancestral,ancestral+ancestral,both+both,both+both,both+derived,both+both,both+both,both+both,ancestral,both+both,both+both,both+both,both,both+both,both+both,both+both,both+both,both,both,both,both,both,both+both,ancestral+ancestral	0.0166,0.0042899999999999995,0.0486,0.00475,0.0446,0.0291,0.0471,0.0179,0.00101,0.0077599999999999995,0.007940000000000001,0.0365,0.0345,0.00818,0.0044,0.00907,0.00456,0.00811,0.00474,0.0487,0.005529999999999999,0.0106,0.0192,0.0282,0.0156,0.00827,0.0406,0.0325,0.0661,0.0421,0.0393,0.0487,0.036000000000000004,0.0349,0.009179999999999999	1,0.0311,0.0656,0.122,0.174,0.0814,1,0.0451,0.0029100000000000003,0.0138,0.007529999999999999,1,1,0.0867,0.021,0.0297,0.0018100000000000002,0.0139,0.0149,1,0.0156,0.0204,0.0789,0.0646,0.0338,0.0119,0.0314,0.0667,0.0361,0.0673,0.0977,0.057,0.10400000000000001,0.0582,1
libB_seq37513_[chr1:38464122-38464321]
libA_seq310925_[chr1:38464569-38464768]	KLF15,ZNF263	-3.896869999999999,-2.5875999999999983	ancestral,both	0.0283,0.0358	1,0.0689
libA_seq21134_[chr1:38477150-38477349]	ZNF212	-3.5612	both	0.0321	0.0533
libB_seq15010_[chr1:38478460-38478659]
libA_seq162677_[chr1:38485456-38485655]
libA_seq230570_[chr1:38485623-38485822]
libA_seq312909_[chr1:38487674-38487873]
libB_seq22197_[chr1:38490584-38490783]
libA_seq306725_[chr1:40534907-40535106]	CTCF,PRDM6,ZNF182,ZNF235,ZNF287,ZNF384	-2.2940999999999985,-1.4951000000000008,-3.2455999999999996,-0.4117999999999995,0.9298000000000002,-2.2843	both+both,both+both,ancestral,both+both,both+both,ancestral+ancestral	0.0187,0.005229999999999999,0.0396,0.019,0.00671,0.0236	0.0595,0.009000000000000001,1,0.0214,0.00502,1
libB_seq261855_[chr1:41456206-41456405]	CTCF,ZNF182,ZNF225,ZNF235,ZNF287,ZNF384	-1.0686,-3.3157999999999994,-3.3839000000000006,-0.41169999999999973,-1.333400000000001,-2.1862999999999992	ancestral+both,both+both,both+both,both+both,both+both,both+both	0.0187,0.0396,0.00456,0.00231,0.000576,0.0236	0.0376,0.0714,0.0128,0.00279,0.000985,0.08900000000000001
libB_seq223056_[chr1:42693998-42694197]
libA_seq295301_[chr1:42734495-42734694]
libA_seq57641_[chr1:42801382-42801581]	VEZF1,ZNF287,ZNF432	0.03031000000000006,0.0964899999999993,1.8999999999999995	derived,derived,ancestral+derived	1,1,0.0448	0.0346,0.0345,0.0334
libB_seq303640_[chr1:42968219-42968418]
libA_seq263360_[chr1:42968220-42968419]
libA_seq206636_[chr1:46890678-46890877]	ZNF263	1.15306	derived	1	0.0365
libB_seq251302_[chr1:49562909-49563108]	IRF3,KLF15,KLF6,MAZ,PATZ1,PRDM9,VEZF1,WT1,ZNF263,ZNF341,ZNF467,ZNF880	-2.4604,-3.3712,-2.3673800000000007,-2.264239999999999,-1.3169000000000022,-0.4953000000000003,-1.9939,-2.0824,-1.8367999999999984,-3.516400000000001,-2.1837,-2.5277399999999997	both,both,ancestral,both+both,both,both,both+both,both,both+both,both,both+both,ancestral+both	0.039,0.0179,0.0474,0.0142,0.00939,0.0332,0.0113,0.0191,0.0176,0.0167,0.008159999999999999,0.0244	0.0626,0.0353,1,0.0253,0.0126,0.036000000000000004,0.0204,0.0293,0.0273,0.0344,0.0137,0.0411
libB_seq194738_[chr1:49584035-49584234]
libB_seq318385_[chr1:49599468-49599667]	ZSCAN16	-3.3333	both+both	0.000488	0.00146
libA_seq216012_[chr1:49667265-49667464]
libA_seq51190_[chr1:49674179-49674378]
libB_seq61818_[chr1:49681128-49681327]
libA_seq61823_[chr1:49689199-49689398]
libB_seq201431_[chr1:49710047-49710246]
libB_seq170499_[chr1:49710479-49710678]
libA_seq125823_[chr1:49740544-49740743]
libB_seq8980_[chr1:49744906-49745105]
libB_seq17836_[chr1:49828147-49828346]
libB_seq166582_[chr1:49839990-49840189]
libB_seq80821_[chr1:49859351-49859550]
libB_seq18557_[chr1:49892766-49892965]
libB_seq101865_[chr1:49894882-49895081]
libA_seq169146_[chr1:49913041-49913240]
libA_seq178536_[chr1:49924514-49924713]	ZNF182	3.6579	derived	1	0.0396
libB_seq124007_[chr1:49933868-49934067]
libB_seq253674_[chr1:49943225-49943424]
libB_seq254548_[chr1:49948581-49948780]
libB_seq134407_[chr1:49949894-49950093]
libB_seq246519_[chr1:49957928-49958127]	ZBTB17,ZNF263,ZNF341,ZNF432,ZNF467	1.9633000000000003,2.5464,-0.7950999999999997,0.17000000000000082,1.7777999999999992	both,both,both,both,both+both	0.0501,0.0606,0.0403,0.0295,0.0177	0.0303,0.0379,0.0476,0.0286,0.0121
libB_seq258467_[chr1:49984296-49984495]
libB_seq219835_[chr1:49988263-49988462]
libA_seq243466_[chr1:49988857-49989056]	ZNF287	-2.05263	ancestral	0.0226	1
libB_seq84958_[chr1:50004260-50004459]	ZNF785	-9.24742	both	0.0465	0.161
libB_seq280072_[chr1:50011383-50011582]	ZNF235	0.2353	both	0.0358	0.0335
libB_seq48453_[chr1:50018512-50018711]
libB_seq173937_[chr1:50026632-50026831]
libA_seq309268_[chr1:50046430-50046629]
libA_seq54703_[chr1:50050244-50050443]	ZNF487	-9.24242	both	0.0219	0.0669
libB_seq138283_[chr1:50061516-50061715]
libB_seq297118_[chr1:50083893-50084092]
libA_seq256035_[chr1:50108988-50109187]	ZNF235,ZNF287,ZNF432,ZNF467	0.3236000000000008,-0.5175999999999998,-0.08000000000000007,1.13889	both+both,both,both,both	0.0195,0.00255,0.0166,0.0344	0.0177,0.00305,0.0168,0.0273
libB_seq116754_[chr1:50130278-50130477]
libB_seq62874_[chr1:50134680-50134879]
libA_seq264615_[chr1:50151924-50152123]
libB_seq245536_[chr1:50188375-50188574]	ZNF467,ZNF823	-5.94848,-0.7128999999999994	ancestral,both	0.0427,0.0309	1,0.0401
libA_seq26882_[chr1:50199936-50200135]	ZNF235	-2.2255	both+both	0.011	0.0219
libB_seq241747_[chr1:50200782-50200981]
libA_seq173223_[chr1:50225404-50225603]
libB_seq24095_[chr1:50247415-50247614]
libA_seq314527_[chr1:50253284-50253483]	ZNF287,ZNF467,ZNF880	0.6491100000000003,-1.8979600000000003,-1.055550000000001	both,ancestral+ancestral,ancestral	0.018000000000000002,0.0252,0.0339	0.0153,1,1
libB_seq48049_[chr1:50278168-50278367]
libA_seq191883_[chr1:50307645-50307844]	MAZ,VEZF1,ZNF263,ZNF383	0.7785700000000002,0.5818000000000012,0.5,-1.1204	derived,both+both,derived,both	1,0.019,1,0.0379	0.0264,0.0161,0.0418,0.0432
libB_seq260831_[chr1:50309976-50310175]	KLF15,PATZ1,SP1,ZNF263,ZNF341,ZNF432,ZNF467,ZNF770	-1.567009999999999,-1.8450000000000006,-4.73196,-1.2551000000000005,-0.5,0.7199999999999989,-1.3775500000000003,-3.21424	ancestral,both,ancestral,ancestral,ancestral,both+both,ancestral+ancestral,both	0.0459,0.0153,0.0484,0.0356,0.0494,0.0301,0.0283,0.0386	1,0.023,1,1,1,0.0269,1,0.0657
libA_seq319836_[chr1:50318258-50318457]	KLF15,MAZ,SP4,VEZF1,WT1,ZBTB17,ZNF774	-2.86597,-0.9928600000000003,-3.6147299999999998,-0.278789999999999,-6.123700000000001,-1.63307,-3.8819	ancestral,ancestral,ancestral,ancestral+ancestral,both,ancestral+ancestral,ancestral	0.0353,0.0252,0.045,0.0325,0.0113,0.042,0.0354	1,1,1,1,0.0382,1,1
libA_seq140921_[chr1:50323364-50323563]
libB_seq68533_[chr1:50325557-50325756]
libA_seq205496_[chr1:50387752-50387951]
libB_seq49192_[chr1:50424940-50425139]	PRDM6,ZNF235,ZNF287	-4.38838,-1.3529000000000018,-0.7280699999999989	ancestral,both+both,both	0.0228,0.0248,0.0172	1,0.0358,0.0205
libB_seq150453_[chr1:50427806-50428005]
libA_seq100624_[chr1:50501498-50501697]
libA_seq10532_[chr1:50525197-50525396]	ZNF235,ZNF287	-1.15686,-2.8596199999999996	ancestral+ancestral,both	0.0352,0.0113	1,0.0236
libB_seq67092_[chr1:50529605-50529804]	PRDM6,ZNF287,ZNF341,ZNF432	-0.7282000000000011,-0.6578899999999992,0.9344000000000001,2.95	both,ancestral,derived,both	0.0479,0.0306,1,0.0425	0.057999999999999996,1,0.0458,0.0271
libB_seq170440_[chr1:50541108-50541307]
libA_seq120815_[chr1:50544218-50544417]
libB_seq54044_[chr1:50554458-50554657]
libA_seq254504_[chr1:50564749-50564948]
libB_seq19383_[chr1:50593968-50594167]	IRF3,PATZ1,ZNF467	2.4603,1.5634300000000003,0.23468999999999962	both,derived,derived	0.0796,1,1	0.0492,0.0335,0.0359
libA_seq3576_[chr1:50617847-50618046]
libA_seq71284_[chr1:50630073-50630272]
libB_seq14585_[chr1:50642802-50643001]
libB_seq3998_[chr1:50726904-50727103]
libB_seq157317_[chr1:50879774-50879973]
libA_seq248485_[chr1:50879982-50880181]
libB_seq131446_[chr1:50885605-50885804]	KLF15,MAZ,PATZ1,VEZF1,ZNF263,ZNF341,ZNF432,ZNF467,ZNF580,ZNF770,ZNF880	-2.8865999999999996,0.0713999999999988,-0.42249999999999943,-1.75155,-3.9795999999999996,3.5154000000000014,-0.3899999999999997,-2.9286199999999987,0.2754999999999992,-1.0511,-0.4074100000000014	both,both,both+both,ancestral+ancestral,both+both,both+both,ancestral,both+both,both,ancestral+both,ancestral	0.0191,0.0108,0.0222,0.0214,0.0121,0.0562,0.0425,0.0125,0.043,0.0384,0.0389	0.0349,0.0106,0.0245,1,0.033,0.0291,1,0.0247,0.0402,0.0462,1
libB_seq41380_[chr1:50887297-50887496]	PATZ1,ZNF283	-0.3591999999999995,5.1667000000000005	both,both	0.0295,0.0773	0.032,0.0465
libA_seq99504_[chr1:50892822-50893021]	ZNF880	1.80555	derived	1	0.0291
libA_seq226573_[chr1:50893302-50893501]	SP2,ZNF548,ZNF93	-1.3884300000000014,-2.3889000000000014,-1.6928999999999998	ancestral,both,both	0.0496,0.0438,0.0422	1,0.0696,0.0562
libA_seq78918_[chr1:50893388-50893587]	SP2,ZNF548,ZNF93	-1.3884300000000014,-2.3889000000000014,-1.6928999999999998	ancestral,both,both	0.0496,0.0438,0.0422	1,0.0696,0.0562
libA_seq146170_[chr1:50894235-50894434]	EGR2,FLI1,HKR1,KLF15,MAZ,PATZ1,PRDM9,SP1,SP3,SP4,VEZF1,WT1,ZBTB17,ZNF263,ZNF281,ZNF341,ZNF432,ZNF444,ZNF467,ZNF529,ZNF774,ZNF823,ZNF880	-3.9784000000000006,-4.74227,-5.233600000000001,-0.43299999999999983,-0.5571000000000019,-1.1056000000000008,0.47659999999999947,-4.082460000000001,-2.1111500000000003,-3.803230000000001,-1.8303000000000011,-5.0928,-1.192700000000002,-4.2959,-4.5155,0.03279999999999994,0.28999999999999915,-8.587589999999999,-3.443299999999999,-2.7142799999999996,-0.9544999999999995,2.9907000000000004,1.6480999999…	both,both+both,both,both+both,both+both,both+derived,both+both,ancestral,ancestral,ancestral,both+both,both+both,both+both,both+both,ancestral,both+both,both+both,both+both,both+both,both,both+both,both,both+both	0.0148,0.0247,0.028999999999999998,0.0128,0.00318,0.0124,0.0142,0.0397,0.0471,0.0437,0.00185,0.00365,0.00891,0.0139,0.0466,0.0279,0.0159,0.0301,0.043,0.0366,0.0107,0.0882,0.013000000000000001	0.0383,0.0446,0.0725,0.0143,0.00361,0.0156,0.013000000000000001,1,1,1,0.00335,0.0108,0.0119,0.0378,1,0.0277,0.0151,0.0679,0.0669,0.0521,0.013999999999999999,0.0401,0.0091
libB_seq119170_[chr1:54143373-54143572]
libA_seq199498_[chr1:54183911-54184110]	KLF15,MAZ,PATZ1,PRDM9,VEZF1,ZNF180,ZNF263,ZNF341,ZNF432,ZNF467,ZNF71,ZNF880	-2.41237,-0.9357100000000003,0.0915499999999998,-8.5421,-3.63635,0.10185000000000066,-3.5000300000000006,-1.9588,-0.4399999999999995,-2.3796300000000015,-3.8348999999999975,-1.0185200000000014	ancestral,ancestral,derived,both,both+both,both,ancestral,both+both,both+both,ancestral+ancestral,both,ancestral	0.0389,0.0254,1,0.0026899999999999997,0.0119,0.0474,0.0213,0.0473,0.007529999999999999,0.0219,0.040999999999999995,0.0341	1,1,0.0473,0.0266,0.0334,0.0469,1,0.0691,0.00827,1,0.0599,1
libA_seq308223_[chr1:54183997-54184196]	KLF15,MAZ,PATZ1,PRDM9,VEZF1,ZNF180,ZNF263,ZNF341,ZNF432,ZNF467,ZNF71,ZNF880	-2.41237,-0.9357100000000003,0.0915499999999998,-8.5421,-3.63635,0.10185000000000066,-3.5000300000000006,-2.020599999999998,-6.63,-2.3796300000000015,-3.8348999999999975,-1.8981500000000002	ancestral,ancestral,derived,both,both+both,both,ancestral,both+both,both+both,ancestral+ancestral,both,ancestral+ancestral	0.0389,0.0254,1,0.0026899999999999997,0.0119,0.0474,0.0213,0.0232,0.007529999999999999,0.0219,0.040999999999999995,0.0286	1,1,0.0473,0.0266,0.0334,0.0469,1,0.0314,0.0278,1,0.0599,1
libB_seq195313_[chr1:54580007-54580206]	VEZF1,ZNF467	0.18787999999999982,1.305550000000001	derived,derived+derived	1,1	0.0332,0.0271
libB_seq38869_[chr1:54724220-54724419]	ZNF383	-5.00927	both	0.0399	0.0704
libA_seq79947_[chr1:55281033-55281232]
libA_seq184026_[chr1:55705516-55705715]
libB_seq137465_[chr1:56801126-56801325]
libB_seq1717_[chr1:57013875-57014074]
libB_seq58952_[chr1:59634139-59634338]
libA_seq172951_[chr1:59676717-59676916]	RREB1	-1.9793	both	0.0314	0.0331
libA_seq318216_[chr1:59704966-59705165]
libA_seq101260_[chr1:60119559-60119758]
libB_seq48806_[chr1:60459855-60460054]	CTCF,PRDM6,ZNF182,ZNF235,ZNF287,ZNF384	-5.17643,-1.902899999999999,-3.0526,-1.9313000000000002,-0.5613999999999999,-2.0098000000000003	ancestral,both,ancestral+both,both+both,ancestral,both	0.0187,0.009000000000000001,0.0396,0.0213,0.0313,0.0236	1,0.0192,0.0997,0.0365,1,0.086
libA_seq6823_[chr1:62370668-62370867]	ZNF287	-1.7193	ancestral	0.0245	1
libA_seq98200_[chr1:62747570-62747769]
libA_seq255034_[chr1:62804554-62804753]
libA_seq170507_[chr1:63546189-63546388]	FLI1,HKR1,MAZ,PATZ1,SP4,VEZF1,WT1,ZBTB17,ZNF263,ZNF341,ZNF383,ZNF432,ZNF467,ZNF880	0.41229999999999833,0.4580000000000002,0.7713999999999999,2.3451000000000004,4.39343,1.0,3.0205800000000007,0.9174699999999998,0.2551000000000023,-0.7950999999999997,0.6667000000000005,0.879999999999999,1.6734299999999998,-2.7315000000000005	both,both,both,both+both,both,both+both,derived,derived,both+both,both,both,both+both,both+both,both+both	0.0203,0.039,0.0191,0.0412,0.0816,0.00286,1,1,0.0213,0.0223,0.0359,0.0058200000000000005,0.025,0.00466	0.0185,0.0368,0.0156,0.0234,0.0373,0.00199,0.0306,0.0498,0.0201,0.0264,0.0353,0.00448,0.0167,0.0085
libA_seq189934_[chr1:63559559-63559758]
libA_seq232095_[chr1:63570309-63570508]
libA_seq150151_[chr1:63571460-63571659]
libB_seq255711_[chr1:63573014-63573213]
libB_seq38485_[chr1:63573640-63573839]
libA_seq250461_[chr1:64053631-64053830]
libB_seq368_[chr1:64059098-64059297]
libB_seq15143_[chr1:64059970-64060169]
libA_seq10062_[chr1:64062528-64062727]
libA_seq21870_[chr1:64517413-64517612]
libA_seq101546_[chr1:64656653-64656852]
libA_seq121371_[chr1:65064649-65064848]
libB_seq145772_[chr1:65506224-65506423]	ZBTB17,ZSCAN16	-0.49540000000000006,3.48036	both,both	0.0479,0.0407	0.0543,0.0152
libA_seq211788_[chr1:65634321-65634520]
libA_seq67778_[chr1:66286981-66287180]
libB_seq183896_[chr1:66288338-66288537]
libB_seq265413_[chr1:66582850-66583049]	ZNF287,ZNF384	-1.3333999999999993,2.1584000000000003	both,both+both	0.01,0.0452	0.0146,0.0452
libB_seq63299_[chr1:66870556-66870755]
libA_seq135010_[chr1:66898797-66898996]
libA_seq5052_[chr1:66899229-66899428]
libB_seq266894_[chr1:66899471-66899670]
libA_seq55780_[chr1:66901732-66901931]
libA_seq254257_[chr1:68117311-68117510]
libA_seq65918_[chr1:68118167-68118366]
libA_seq235981_[chr1:68118851-68119050]	EGR2,MAZ,PATZ1,VEZF1,ZBTB17,ZNF263,ZNF341,ZNF432,ZNF467,ZNF880	2.0,1.7142999999999997,1.5493299999999994,2.072800000000001,1.0917700000000004,1.8877299999999995,1.8033000000000001,2.369999999999999,4.425910000000001,2.3888700000000007	both,both+both,derived,both,derived,derived+derived,both+both,both,derived+derived,both	0.0652,0.00897,1,0.00657,1,1,0.0332,0.0403,1,0.0405	0.0424,0.00565,0.0335,0.0032,0.0477,0.0312,0.0227,0.0279,0.0143,0.0248
libA_seq263439_[chr1:68777066-68777265]
libB_seq281305_[chr1:70201491-70201690]	KLF15,MAZ,RREB1,VEZF1,ZNF263,ZNF341,ZNF432,ZNF467,ZNF880	-3.37117,-4.43567,-3.2886000000000006,-1.690949999999999,-1.7755300000000016,-2.319600000000001,-2.66,-4.592610000000001,-1.0740000000000016	ancestral,ancestral+ancestral,both,ancestral,ancestral+ancestral,both,both,ancestral+ancestral,both+both	0.0317,0.0101,0.0322,0.0218,0.0322,0.0229,0.015,0.0137,0.00629	1,1,0.0427,1,1,0.037000000000000005,0.024,1,0.0082
libA_seq72668_[chr1:70213859-70214058]
libB_seq120193_[chr1:70219922-70220121]
libA_seq241678_[chr1:70224641-70224840]
libB_seq194250_[chr1:70748551-70748750]
libA_seq174501_[chr1:73411790-73411989]
libB_seq27920_[chr1:74090323-74090522]
libA_seq182862_[chr1:74201124-74201323]
libA_seq255095_[chr1:74217646-74217845]	ZNF235,ZNF287,ZNF487	3.0000000000000018,4.99995,8.56566	both+both,both+both,both	0.0139,0.0255,0.063	0.00469,0.00673,0.022000000000000002
libA_seq205016_[chr1:74287885-74288084]	FLI1,KLF15,MAZ,PRDM9,SP1,VEZF1,WT1,ZBTB17,ZNF263,ZNF281,ZNF341,ZNF432,ZNF444,ZNF467,ZNF880	-3.1546699999999994,-6.577369999999999,-6.2357,-0.4018700000000006,-3.567,-3.7818499999999986,-4.27834,-6.256869999999999,-2.173499999999999,-4.0722,-4.6639,-1.8200000000000003,-9.402061,-3.4906999999999986,-1.9166700000000008	both,ancestral,both,both,both,ancestral+ancestral,both+both,ancestral,both+both,ancestral,ancestral+ancestral,ancestral+derived,both+both,both+both,ancestral+ancestral	0.0496,0.0168,0.00285,0.0486,0.0301,0.012,0.0196,0.0116,0.0155,0.0497,0.0214,0.0234,0.04,0.00857,0.0286	0.094,1,0.0152,0.0523,0.0649,1,0.0443,1,0.0265,1,1,0.0308,0.0897,0.0184,1
libB_seq215952_[chr1:74290395-74290594]
libB_seq290701_[chr1:74341588-74341787]
libB_seq174675_[chr1:74344100-74344299]	MAZ,ZNF467	-1.5142699999999998,-1.2653000000000008	ancestral,ancestral	0.022000000000000002,0.028999999999999998	1,1
libA_seq207851_[chr1:74344377-74344576]
libB_seq281603_[chr1:74346036-74346235]
libB_seq155091_[chr1:74358948-74359147]
libB_seq208092_[chr1:74360896-74361095]
libB_seq217890_[chr1:74363344-74363543]
libB_seq206674_[chr1:74364258-74364457]
libB_seq68087_[chr1:74415092-74415291]
libA_seq134342_[chr1:74415148-74415347]
libA_seq142826_[chr1:74416563-74416762]
libB_seq202813_[chr1:74580704-74580903]
libA_seq303415_[chr1:74586663-74586862]
libB_seq215797_[chr1:74601449-74601648]
libB_seq71487_[chr1:74606945-74607144]
libA_seq50816_[chr1:74608468-74608667]
libB_seq81579_[chr1:74608948-74609147]
libA_seq196381_[chr1:74610624-74610823]
libA_seq151417_[chr1:74613041-74613240]
libA_seq161580_[chr1:74615474-74615673]
libA_seq248924_[chr1:74634959-74635158]
libB_seq289079_[chr1:74639039-74639238]	ZNF212,ZNF235,ZNF287,ZNF823	4.22449,-2.1471,-3.017599999999998,4.3704	both+both,both,both+both,derived	0.0326,0.0127,0.00135,1	0.0167,0.0245,0.0039,0.0401
libB_seq318042_[chr1:74641702-74641901]
libB_seq75338_[chr1:74651210-74651409]	PRDM6,ZNF235,ZNF287	-1.0388000000000002,-2.2941000000000003,-2.6666000000000007	both,both+both,both+both	0.0198,0.000935,0.0045	0.0282,0.00255,0.009909999999999999
libA_seq52781_[chr1:75045356-75045555]	ZNF432,ZNF467	-7.02,-0.06481000000000137	ancestral,ancestral	0.0139,0.0347	1,1
libA_seq211709_[chr1:75059734-75059933]	ZNF235,ZNF287,ZNF35,ZNF487	-0.94116,-0.8947300000000009,-2.8508999999999993,-7.535354999999999	ancestral,both+both,both,ancestral	0.0372,0.0271,0.038,0.0487	1,0.0326,0.0713,1
libA_seq275513_[chr1:75060869-75061068]
libA_seq194777_[chr1:76694246-76694445]	ZNF235	-0.84314	ancestral	0.0382	1
libA_seq293425_[chr1:76865005-76865204]
libB_seq138826_[chr1:77281591-77281790]
libB_seq41795_[chr1:77494541-77494740]
libB_seq88424_[chr1:78057641-78057840]	MAZ,SP2,VEZF1,ZNF263,ZNF467,ZNF770	-0.9285999999999994,2.8346800000000005,0.024199999999998667,3.25772,-0.7449000000000012,3.020439999999999	both+both,derived,both+both,derived+derived,both+both,derived	0.00314,1,0.0193,1,0.0175,1	0.004,0.0387,0.0191,0.0482,0.0208,0.0485
libA_seq254960_[chr1:78061268-78061467]
libA_seq210815_[chr1:78080920-78081119]
libA_seq268444_[chr1:78144484-78144683]
libB_seq179329_[chr1:78150896-78151095]
libB_seq74837_[chr1:78193137-78193336]
libB_seq154983_[chr1:78202926-78203125]	ZNF235	0.00981	derived	1	0.046
libA_seq169274_[chr1:78209401-78209600]
libB_seq216941_[chr1:78220068-78220267]
libA_seq271242_[chr1:78233594-78233793]	TFAP2A	-7.7113	ancestral	0.0425	1
libA_seq83167_[chr1:78236159-78236358]
libA_seq243189_[chr1:78240691-78240890]
libB_seq128289_[chr1:78247158-78247357]	PRDM6,ZNF383,ZNF432	1.9417799999999996,-6.13893,-2.3600000000000003	derived,both,ancestral	1,0.0362,0.0314	0.0482,0.0713,1
libB_seq121452_[chr1:78264026-78264225]
libA_seq140787_[chr1:78274246-78274445]	ZNF341,ZNF432	1.7213000000000012,0.5	both+both,derived	0.0286,1	0.0209,0.0418
libA_seq270372_[chr1:78283412-78283611]
libB_seq27427_[chr1:78303320-78303519]
libB_seq308439_[chr1:78323966-78324165]
libB_seq20113_[chr1:78329530-78329729]
libA_seq66354_[chr1:78344820-78345019]
libB_seq47163_[chr1:78344965-78345164]
libA_seq18023_[chr1:78354734-78354933]
libA_seq24442_[chr1:78372751-78372950]
libB_seq131529_[chr1:78403932-78404131]
libB_seq13583_[chr1:78441165-78441364]
libA_seq113528_[chr1:78452042-78452241]	VEZF1,ZNF235,ZNF287	0.73935,-0.039220000000000255,-3.078949999999999	derived,ancestral,ancestral	1,0.0457,0.0177	0.0288,1,1
libB_seq124915_[chr1:78474259-78474458]
libB_seq86455_[chr1:78483452-78483651]	ZNF8	-3.0412	both	0.00588	0.0252
libB_seq249960_[chr1:78495689-78495888]	ZNF235,ZNF287	-1.3920999999999992,-0.5263199999999992	both,both	0.0125,0.0255	0.0193,0.0285
libA_seq189499_[chr1:78663476-78663675]	ZNF235,ZNF287,ZNF35,ZNF384,ZNF487	-2.5,-3.9210399999999996,0.16670000000000051,-2.0883000000000003,-9.05051	both+both,both+both,both,ancestral+ancestral,both	0.0028,0.0113,0.0511,0.0291,0.0264	0.00822,0.0298,0.0489,1,0.0711
libB_seq214078_[chr1:78720458-78720657]	CTCF,PRDM6,ZNF182,ZNF235,ZNF287,ZNF384,ZNF487	1.225500000000002,-2.5436000000000014,0.42109999999999914,-3.5587999999999997,-1.8157999999999994,-2.2843,-8.56565	both+both,ancestral+both,both+both,both+both,both+both,ancestral+ancestral,both	0.0187,0.0157,0.0396,0.00465,0.00591,0.0236,0.0384	0.0187,0.0358,0.0396,0.0166,0.0101,1,0.0862
libB_seq203142_[chr1:79046604-79046803]	ZNF235	1.9411	both	0.0293	0.0169
libB_seq193006_[chr1:79105206-79105405]
libB_seq272479_[chr1:79116264-79116463]
libB_seq245800_[chr1:79127861-79128060]	ZNF235,ZNF287	0.3236000000000008,0.7894699999999997	both,derived	0.0366,1	0.0335,0.0298
libA_seq155281_[chr1:80226699-80226898]
libB_seq278254_[chr1:80870349-80870548]	ZNF212,ZNF235,ZNF287,ZNF487,ZSCAN16	-5.5510100000000016,2.1765000000000008,2.5438000000000027,-17.313160000000003,-3.029420000000001	both,both+both,both+both,both+both,both	0.0424,0.0179,0.0049700000000000005,0.00114,0.0263	0.0822,0.00919,0.00217,0.02,0.0567
libA_seq192190_[chr1:80870350-80870549]	ZNF212,ZNF235,ZNF287,ZNF487,ZSCAN16	-5.5510100000000016,2.1765000000000008,2.5438000000000027,-17.313160000000003,-3.029420000000001	both,both+both,both+both,both+both,both	0.0424,0.0179,0.0049700000000000005,0.00114,0.0263	0.0822,0.00919,0.00217,0.02,0.0567
libB_seq279735_[chr1:81189992-81190191]	CTCF,ZNF182,ZNF384	1.2255000000000003,1.403500000000001,-1.960799999999999	both,both,ancestral+ancestral	0.0632,0.0866,0.0312	0.0429,0.0457,1
libB_seq230721_[chr1:81722430-81722629]	FLI1,MAZ,VEZF1,ZNF432,ZNF467	-9.886602,0.07143000000000121,-0.9515499999999992,-2.66,-1.9259200000000023	both,derived,ancestral,both,ancestral+ancestral	0.0494,1,0.0272,0.0146,0.0239	0.114,0.0313,1,0.0239,1
libB_seq37684_[chr1:81946532-81946731]
libB_seq63122_[chr1:82222557-82222756]
libA_seq247327_[chr1:82826960-82827159]	ZSCAN16	-2.1961	both+both	0.000648	0.00135
libA_seq86032_[chr1:83134671-83134870]
libA_seq85366_[chr1:84384006-84384205]
libA_seq15559_[chr1:84386963-84387162]	ZNF235,ZNF287	1.0686600000000013,1.1929799999999986	derived,derived+derived	1,1	0.0361,0.0273
libB_seq135182_[chr1:84388193-84388392]	ZNF235,ZNF287	-0.8137299999999996,-0.07894999999999985	ancestral,ancestral	0.0385,0.0346	1,1
libA_seq286978_[chr1:84388894-84389093]	FLI1,IRF3,PRDM6,ZNF225,ZNF235,ZNF287,ZNF432,ZNF487	-0.7731999999999992,-1.4762000000000004,0.20389999999999908,9.41409,2.784299999999998,5.991199999999999,-2.1999999999999993,8.31313	both,both+both,both+both,both,both+both,both+both,both+both,derived	0.0381,0.0293,0.0195,0.122,0.00279,0.000932,0.0249,1	0.046,0.0369,0.0181,0.0473,0.000766,0.000101,0.035,0.0472
libA_seq259879_[chr1:84388997-84389196]	PRDM6,ZNF235,ZNF263,ZNF287,ZNF35,ZNF432,ZNF467	-0.21359999999999957,5.098000000000001,-1.9694299999999991,2.0086999999999993,0.561399999999999,0.05000000000000071,-2.444440000000001	both+both,both+both,ancestral+ancestral,both+both,both,both+both,ancestral	0.0278,0.0332,0.0307,0.00547,0.0317,0.0255,0.0216	0.0295,0.0067599999999999995,1,0.00294,0.0306,0.0253,1
libA_seq187256_[chr1:84392297-84392496]
libA_seq208136_[chr1:84392547-84392746]	ZNF235	0.4117	both+both	0.00656	0.00547
libA_seq157664_[chr1:84397054-84397253]
libB_seq34727_[chr1:84398837-84399036]	ZNF287,ZNF71	0.3508799999999983,-4.357800000000001	derived,both	1,0.040999999999999995	0.0326,0.0615
libB_seq25843_[chr1:84398923-84399122]	ZNF287,ZNF432,ZNF71	0.3508799999999983,-2.7700000000000005,-4.357800000000001	derived,both+both,both	1,0.0278,0.040999999999999995	0.0326,0.0425,0.0615
libB_seq89688_[chr1:84705487-84705686]
libB_seq138508_[chr1:84770189-84770388]
libB_seq249932_[chr1:84836400-84836599]	EGR2,MAZ,PATZ1,SP1,SP3,VEZF1,WT1,ZNF263,ZNF341,ZNF432,ZNF467,ZNF770,ZNF880	1.1151999999999997,0.7429000000000006,0.9507000000000012,-3.8247,-0.6204000000000001,1.1454499999999985,1.1030999999999995,0.5917999999999992,0.5655999999999999,0.08000000000000007,1.3163999999999998,2.64288,1.7963400000000007	both,both+both,both+both,both,both+both,derived,both+both,both,derived,both,both+both,both,both	0.039,0.0154,0.028999999999999998,0.0292,0.0329,1,0.0316,0.0486,1,0.0283,0.0158,0.0667,0.0286	0.0306,0.0126,0.0227,0.0486,0.0397,0.0256,0.0257,0.0429,0.0487,0.0279,0.0115,0.0435,0.0196
libB_seq73604_[chr1:84842249-84842448]
libA_seq43919_[chr1:85462095-85462294]	ZNF529	9.64291	both	0.0606	0.0172
libA_seq148319_[chr1:85981701-85981900]	ZNF263	-0.94898	ancestral	0.0383	1
libB_seq12174_[chr1:87630971-87631170]	ZNF487	-9.41414	both	0.0203	0.0647
libB_seq278406_[chr1:87921431-87921630]	PRDM6,ZNF235,ZNF287,ZNF384	-2.2329799999999995,-0.3529,-1.2543699999999998,0.9510000000000005	ancestral,both+both,both,both+both	0.0443,0.00851,0.0137,0.0324	1,0.00949,0.0188,0.0236
libB_seq320389_[chr1:88289472-88289671]	EGR2,IRF3,KLF15,MAZ,PATZ1,PRDM9,VEZF1,WT1,ZBTB17,ZNF212,ZNF263,ZNF341,ZNF398,ZNF432,ZNF467,ZNF529,ZNF596,ZNF774,ZNF823,ZNF880	-2.7482000000000006,-2.7223000000000006,-0.8247,-2.4214,-0.5351999999999997,0.971899999999998,-3.6364,-0.8557000000000006,-2.4037000000000006,-3.0203999999999986,-3.479599999999998,-2.6066000000000003,-7.670059999999999,-0.8899999999999997,-4.092699999999999,7.83677,-1.626100000000001,3.1000000000000014,-0.713000000000001,-6.1852	both,both+both,both+both,both+both,both+both,both+both,both+both,both+both,both+both,both+both,both+both,ancestral+ancestral,both+both,both+both,both+both,both,both+both,both+both,both+both,both+both	0.0331,0.0361,0.0175,0.0031899999999999997,0.0159,0.00534,0.00203,0.0143,0.0171,2.9999999999999997e-05,0.00252,0.0319,0.0154,0.0242,0.0397,0.0557,0.0282,0.0366,0.00877,0.006379999999999999	0.059000000000000004,0.0579,0.0201,0.0064,0.0181,0.00402,0.00755,0.017,0.0345,7.79e-05,0.00575,1,0.106,0.0278,0.0689,0.0198,0.046,0.0159,0.0124,0.0241
libB_seq111974_[chr1:90537238-90537437]	PRDM9,ZNF432,ZNF880	1.5888000000000009,0.1800000000000006,-0.009260000000001156	both,both,ancestral	0.0308,0.0383,0.042	0.0219,0.0374,1
libB_seq187903_[chr1:90546777-90546976]
libB_seq134493_[chr1:90548358-90548557]
libB_seq94328_[chr1:90548521-90548720]	PATZ1,VEZF1,ZNF467,ZNF780A	1.3873300000000004,1.1333600000000015,0.9259200000000023,8.2577	derived,both,derived+derived,derived	1,0.0343,1,1	0.0347,0.0251,0.0293,0.0359
libA_seq281290_[chr1:90549461-90549660]
libB_seq189539_[chr1:90550349-90550548]	ZNF235,ZNF287	-1.0686600000000013,0.3333300000000001	ancestral,both	0.0361,0.0328	1,0.0306
libB_seq28841_[chr1:90550654-90550853]
libB_seq176874_[chr1:90550861-90551060]	ZSCAN16	-3.48044	both+both	0.00736	0.0218
libB_seq54804_[chr1:90551361-90551560]
libA_seq98264_[chr1:90551478-90551677]
libA_seq66781_[chr1:90551846-90552045]	PATZ1,ZBTB17,ZNF263,ZNF281	-1.2464300000000001,-1.5229700000000008,-0.5306099999999994,-5.1752600000000015	ancestral,ancestral,both,both	0.0361,0.0429,0.0357,0.0311	1,1,0.0401,0.0692
libB_seq8597_[chr1:90553238-90553437]
libA_seq5698_[chr1:90553361-90553560]
libB_seq5761_[chr1:90554013-90554212]
libA_seq321707_[chr1:90600960-90601159]
libB_seq114527_[chr1:90721233-90721432]
libA_seq46481_[chr1:90721503-90721702]
libB_seq128419_[chr1:93905807-93906006]
libB_seq200917_[chr1:93917791-93917990]
libA_seq13584_[chr1:93953394-93953593]
libA_seq92727_[chr1:94002665-94002864]
libA_seq221909_[chr1:94011041-94011240]
libB_seq48886_[chr1:94015215-94015414]
libA_seq314437_[chr1:94196690-94196889]
libB_seq91859_[chr1:94199818-94200017]
libA_seq36727_[chr1:94204613-94204812]	ZNF189	-2.5155	both	0.0481	0.187
libA_seq310419_[chr1:94333283-94333482]	ZNF384	0	both+both	0.0236	0.0236
libB_seq74564_[chr1:94931278-94931477]	ZNF880	-0.90741	ancestral	0.035	1
libB_seq291773_[chr1:94962963-94963162]
libA_seq148693_[chr1:94967754-94967953]
libB_seq268946_[chr1:94972399-94972598]
libA_seq177350_[chr1:95314397-95314596]	KLF15,VEZF1,ZNF383,ZNF529,ZNF93	2.9278699999999995,1.1333000000000002,3.1111000000000004,0.7551000000000005,5.800000000000001	derived,both,both,both,both	1,0.028999999999999998,0.0294,0.0366,0.0647	0.0348,0.021,0.017,0.0344,0.0263
libA_seq140093_[chr1:95387109-95387308]
libB_seq20898_[chr1:95497960-95498159]	ZNF444	2.07217	both+both	0.0467	0.0385
libB_seq55621_[chr1:95499173-95499372]
libA_seq43714_[chr1:95500956-95501155]
libB_seq173708_[chr1:95502988-95503187]	ZNF341	1.4098	derived	1	0.0411
libB_seq30134_[chr1:95503197-95503396]
libB_seq278483_[chr1:95503469-95503668]
libA_seq276809_[chr1:95506073-95506272]	HKR1	-0.0841	both	0.0406	0.0416
libA_seq142604_[chr1:95506792-95506991]
libB_seq241662_[chr1:96336333-96336532]
libB_seq29409_[chr1:96340931-96341130]	ZNF235,ZNF71	0.6372600000000013,-1.5137	derived,both	1,0.040999999999999995	0.0401,0.040999999999999995
libA_seq101977_[chr1:96379925-96380124]
libB_seq222206_[chr1:96384062-96384261]
libA_seq313308_[chr1:96384101-96384300]
libA_seq281440_[chr1:96392108-96392307]
libA_seq137463_[chr1:96393979-96394178]
libB_seq291963_[chr1:96400829-96401028]
libB_seq188784_[chr1:96401462-96401661]
libA_seq145723_[chr1:96491515-96491714]
libA_seq45602_[chr1:96535732-96535931]
libA_seq65329_[chr1:96541616-96541815]
libB_seq57269_[chr1:96557961-96558160]	ZNF212	-4.69387	both	0.0222	0.0448
libB_seq136753_[chr1:96558527-96558726]
libB_seq71847_[chr1:96558621-96558820]
libB_seq134551_[chr1:96564661-96564860]
libB_seq246654_[chr1:96579179-96579378]
libB_seq192107_[chr1:96579986-96580185]
libB_seq321309_[chr1:96582912-96583111]	ZNF235	-1.79416	ancestral	0.0295	1
libB_seq35117_[chr1:96589267-96589466]
libB_seq260405_[chr1:96594092-96594291]
libA_seq119037_[chr1:96602494-96602693]
libA_seq245246_[chr1:97462330-97462529]	ZNF235,ZNF263,ZNF287	0.40199999999999925,1.4489300000000007,-0.9912299999999998	both+both,derived,both+both	0.0341,1,0.0189	0.0305,0.0345,0.0241
libB_seq113728_[chr1:97462475-97462674]
libA_seq58802_[chr1:97463446-97463645]	PRDM9,ZNF563,ZNF571	-3.990660000000001,-0.8129999999999988,-8.231440000000001	ancestral,both,both	0.0277,0.0479,0.0432	1,0.0712,0.133
libB_seq286192_[chr1:98536223-98536422]
libB_seq45044_[chr1:98540833-98541032]
libB_seq276409_[chr1:98544438-98544637]
libA_seq243614_[chr1:98546963-98547162]
libA_seq68757_[chr1:99066159-99066358]
libB_seq203334_[chr1:99066328-99066527]
libA_seq257658_[chr1:99069461-99069660]
libB_seq250491_[chr1:99070070-99070269]
libB_seq78915_[chr1:99073055-99073254]
libB_seq68782_[chr1:99074081-99074280]
libB_seq293562_[chr1:99078386-99078585]
libA_seq279678_[chr1:99081870-99082069]
libB_seq211120_[chr1:99083117-99083316]
libB_seq56643_[chr1:99091467-99091666]	ZNF287	-1.13158	both	0.0172	0.0226
libA_seq233082_[chr1:99091672-99091871]
libA_seq151017_[chr1:99093725-99093924]
libB_seq306676_[chr1:99096342-99096541]	ZNF774,ZNF823	-3.2272999999999996,-5.324100000000001	both,ancestral	0.0248,0.0287	0.0577,1
libA_seq263240_[chr1:99767627-99767826]
libA_seq36960_[chr1:101150064-101150263]
libA_seq255928_[chr1:101157210-101157409]
libB_seq223038_[chr1:101161587-101161786]	ZNF235,ZNF287,ZNF487	0.7254900000000006,-2.5175,7.74747	derived,both,both	1,0.0038399999999999997,0.094	0.0394,0.00829,0.0472
libB_seq234345_[chr1:101161647-101161846]	ZNF235,ZNF287,ZNF487	0.7254900000000006,-2.5175,7.74747	derived,both,both	1,0.0038399999999999997,0.094	0.0394,0.00829,0.0472
libA_seq20072_[chr1:101196756-101196955]	PRDM9	2.0934	both	0.0336	0.0215
libB_seq140821_[chr1:104009919-104010118]
libB_seq284365_[chr1:104017539-104017738]
libA_seq215378_[chr1:104021217-104021416]
libB_seq238891_[chr1:104021284-104021483]
libB_seq201217_[chr1:104059849-104060048]
libA_seq100098_[chr1:104059992-104060191]
libA_seq77740_[chr1:104060156-104060355]	PRDM9,VEZF1,ZNF432	1.0373900000000011,0.07878999999999792,-0.8500000000000005	derived,derived,both+both	1,1,0.0251	0.0489,0.0343,0.0284
libA_seq291827_[chr1:104079628-104079827]
libB_seq30671_[chr1:104099636-104099835]
libB_seq255133_[chr1:104103084-104103283]
libB_seq6802_[chr1:104103333-104103532]
libB_seq80196_[chr1:104105781-104105980]
libB_seq221625_[chr1:104129543-104129742]
libA_seq288636_[chr1:104303766-104303965]
libA_seq147940_[chr1:104319118-104319317]
libA_seq185749_[chr1:104319410-104319609]	ZNF235	-1.58826	ancestral	0.0311	1
libB_seq145692_[chr1:104321492-104321691]
libB_seq98265_[chr1:104328123-104328322]
libA_seq124703_[chr1:104335281-104335480]
libB_seq128828_[chr1:104337152-104337351]
libA_seq302517_[chr1:104337458-104337657]
libA_seq290707_[chr1:104338177-104338376]
libB_seq293417_[chr1:104997769-104997968]	ZNF212	3.32654	both	0.0377	0.0229
libA_seq2880_[chr1:104999322-104999521]
libB_seq114312_[chr1:105001897-105002096]
libA_seq31635_[chr1:105004499-105004698]
libA_seq17509_[chr1:105004703-105004902]
libA_seq115243_[chr1:105004834-105005033]
libB_seq223545_[chr1:105005057-105005256]	PRDM9	-4.46732	both	0.0178	0.0452
libB_seq100769_[chr1:105005481-105005680]
libB_seq111520_[chr1:105006530-105006729]
libB_seq125541_[chr1:105006702-105006901]
libB_seq241775_[chr1:105007411-105007610]
libB_seq312508_[chr1:105008520-105008719]	ZNF287	-1.6053	both	0.00766	0.012
libA_seq89319_[chr1:105008730-105008929]	ZNF212,ZNF341,ZNF93	-3.6428529999999997,0.36079999999999934,-1.8927999999999994	both+both,both+both,both	0.00933,0.0383,0.0422	0.0179,0.0352,0.0582
libA_seq287968_[chr1:105011234-105011433]
libB_seq97054_[chr1:105012050-105012249]	ZNF287	-0.05263	ancestral	0.0349	1
libA_seq108831_[chr1:105012072-105012271]	ZNF287	-0.05263	ancestral	0.0349	1
libA_seq320886_[chr1:105013495-105013694]	ZNF212,ZNF235,ZNF287,ZNF35,ZNF487	4.704110000000001,2.1667000000000005,0.9824000000000002,0.03509999999999991,2.5656529999999997	both+derived,both+both,both+both,both,both	0.0586,0.0172,0.00504,0.0317,0.0505	0.0308,0.00869,0.00375,0.0317,0.0397
libA_seq99646_[chr1:105014014-105014213]
libB_seq300374_[chr1:105014243-105014442]
libB_seq80745_[chr1:105014274-105014473]
libB_seq93137_[chr1:105014641-105014840]	KLF1,KLF15,KLF5,SP1	-8.154670000000001,-5.855649999999999,-6.2887,-4.061860000000001	ancestral+ancestral,ancestral,both,ancestral	0.0387,0.0404,0.007390000000000001,0.04	1,1,0.0697,1
libB_seq160651_[chr1:105015598-105015797]
libA_seq182096_[chr1:105015846-105016045]
libA_seq61651_[chr1:105015894-105016093]
libB_seq99683_[chr1:105017463-105017662]	IRF3,VEZF1,ZBTB17,ZNF235,ZNF432,ZNF467,ZNF880	2.992099999999999,1.9091000000000005,1.4770000000000003,-1.392100000000001,3.129999999999999,2.6224799999999995,2.0092999999999996	both,both,both,both,both+both,both+both,both+both	0.0627,0.0136,0.0572,0.0213,0.00286,0.0334,0.0266	0.0368,0.00755,0.0395,0.0315,0.00125,0.0186,0.0175
libB_seq22683_[chr1:105017917-105018116]
libA_seq64353_[chr1:105018340-105018539]
libB_seq99422_[chr1:105018684-105018883]
libB_seq60309_[chr1:105018865-105019064]	ZNF235,ZNF287,ZNF880	0.35294000000000025,2.64912,-0.6389200000000006	derived,derived,both	1,1,0.025	0.0429,0.0194,0.0286
libA_seq130605_[chr1:105019644-105019843]
libA_seq46572_[chr1:105020799-105020998]
libB_seq182087_[chr1:105021316-105021515]
libB_seq42176_[chr1:105021910-105022109]
libB_seq300221_[chr1:105022305-105022504]
libA_seq265270_[chr1:105022540-105022739]
libB_seq91547_[chr1:105023181-105023380]
libA_seq131935_[chr1:105024359-105024558]	ZNF98	-1.2202	both	0.0474	0.0686
libA_seq186144_[chr1:105024659-105024858]
libA_seq21250_[chr1:105025120-105025319]
libA_seq195950_[chr1:105025599-105025798]
libA_seq164215_[chr1:105025966-105026165]
libA_seq186853_[chr1:105026020-105026219]
libA_seq30006_[chr1:105027026-105027225]	ZNF235	0.35294	derived	1	0.0429
libB_seq313172_[chr1:105027806-105028005]	ZNF287	-0.5263	both+both	0.0108	0.0126
libA_seq314786_[chr1:105027952-105028151]
libA_seq159459_[chr1:105029110-105029309]
libA_seq316318_[chr1:105030351-105030550]
libB_seq307967_[chr1:105031021-105031220]	VEZF1,ZNF263,ZNF467	-0.32728,-3.69383,-2.510160000000001	ancestral,ancestral+ancestral,both+both	0.0321,0.0203,0.0189	1,1,0.0332
libA_seq202841_[chr1:105031045-105031244]	VEZF1,ZNF263,ZNF467	-0.32728,-3.69383,-2.510160000000001	ancestral,ancestral+ancestral,both+both	0.0321,0.0203,0.0189	1,1,0.0332
libB_seq276030_[chr1:105032080-105032279]
libB_seq140742_[chr1:105032111-105032310]
libB_seq92773_[chr1:105032271-105032470]	ZIM2	-9.67009	both	0.0299	0.0733
libB_seq135981_[chr1:105032931-105033130]
libA_seq67144_[chr1:105033227-105033426]
libA_seq271659_[chr1:105033557-105033756]
libB_seq204562_[chr1:105034060-105034259]
libA_seq284190_[chr1:105034596-105034795]
libA_seq286572_[chr1:105036406-105036605]
libB_seq243495_[chr1:105036437-105036636]
libB_seq199928_[chr1:105038557-105038756]	ZNF146,ZNF260	-9.412379999999999,-6.9693999999999985	both,both	0.0117,0.0293	0.111,0.326
libA_seq113061_[chr1:105038647-105038846]	ZNF146,ZNF260	-9.412379999999999,-6.9693999999999985	both,both	0.0117,0.0293	0.111,0.326
libA_seq166161_[chr1:105039113-105039312]
libB_seq241077_[chr1:105039733-105039932]
libA_seq76981_[chr1:105039740-105039939]
libB_seq58461_[chr1:105039773-105039972]
libB_seq254534_[chr1:105039998-105040197]
libB_seq255910_[chr1:105040596-105040795]
libB_seq222876_[chr1:105040774-105040973]
libB_seq202001_[chr1:105041362-105041561]	RXRA,ZNF212,ZNF287,ZNF341,ZNF432,ZNF467,ZNF880	1.4356999999999989,5.061269999999999,-2.052629999999999,1.7212999999999994,-0.5800000000000001,0.6836700000000002,0.24069999999999858	both,both,ancestral,derived,both,derived,both+both	0.0659,0.0648,0.0226,1,0.0382,1,0.0185	0.0488,0.0337,1,0.0381,0.0415,0.0326,0.0176
libB_seq105968_[chr1:105041425-105041624]	RXRA,ZNF212,ZNF287,ZNF341,ZNF432,ZNF467,ZNF880	1.4356999999999989,5.061269999999999,-2.052629999999999,1.7212999999999994,-0.5800000000000001,0.6836700000000002,0.24069999999999858	both,both,ancestral,derived,both,derived,both+both	0.0659,0.0648,0.0226,1,0.0382,1,0.0185	0.0488,0.0337,1,0.0381,0.0415,0.0326,0.0176
libB_seq213608_[chr1:105041730-105041929]	ZNF235,ZNF287,ZNF35	-2.2156599999999997,-5.32454,-1.1754999999999995	ancestral,both,both	0.0265,0.00821,0.0317	1,0.0313,0.038
libA_seq229281_[chr1:105041946-105042145]
libA_seq274738_[chr1:105042163-105042362]	ZNF467	-0.16667	ancestral	0.034	1
libB_seq114345_[chr1:105042215-105042414]	ZNF467	-0.16667	ancestral	0.034	1
libB_seq316828_[chr1:105043039-105043238]	ZNF287,ZNF879	3.28073,-2.2728	both,both	0.0179,0.000773	0.00719,0.0024100000000000002
libA_seq251994_[chr1:105043073-105043272]	ZNF287,ZNF879	3.28073,-2.2728	both,both	0.0179,0.000773	0.00719,0.0024100000000000002
libB_seq187194_[chr1:105043632-105043831]
libA_seq168641_[chr1:105044783-105044982]
libB_seq143717_[chr1:105045910-105046109]
libB_seq308313_[chr1:105046710-105046909]
libA_seq239820_[chr1:105047324-105047523]
libB_seq137664_[chr1:105047326-105047525]
libA_seq221441_[chr1:105047465-105047664]
libA_seq104731_[chr1:105048041-105048240]
libA_seq50229_[chr1:105050293-105050492]
libA_seq225144_[chr1:105051084-105051283]	ZNF287,ZNF384	-1.2192999999999996,-1.7058999999999997	ancestral,ancestral	0.0272,0.036000000000000004	1,1
libA_seq203450_[chr1:105053591-105053790]
libA_seq197490_[chr1:105054256-105054455]
libB_seq295691_[chr1:105054614-105054813]	ZNF880	-2.34258	both+both	0.0209	0.0337
libB_seq197451_[chr1:105056552-105056751]
libB_seq75604_[chr1:105056765-105056964]	PRDM6,VEZF1,ZNF263	-0.17480000000000118,0.06666999999999845,3.1224299999999996	both,derived,derived	0.0227,1,1	0.0241,0.0343,0.0234
libA_seq224047_[chr1:105060593-105060792]
libB_seq221235_[chr1:105063900-105064099]
libB_seq17226_[chr1:105068708-105068907]
libB_seq28129_[chr1:105074235-105074434]
libB_seq58259_[chr1:105074812-105075011]
libA_seq155307_[chr1:105074841-105075040]
libB_seq56425_[chr1:105074900-105075099]
libB_seq254110_[chr1:105075061-105075260]
libB_seq149533_[chr1:105076696-105076895]	MAZ	0.12857	derived	1	0.0309
libB_seq182811_[chr1:105550974-105551173]
libB_seq276719_[chr1:105785659-105785858]	ZNF341,ZNF467,ZNF880	1.213099999999999,0.08333000000000101,0.3055500000000011	derived,derived,derived	1,1,1	0.0431,0.0346,0.0396
libB_seq59015_[chr1:105785966-105786165]
libB_seq198666_[chr1:105786785-105786984]
libB_seq82279_[chr1:105787171-105787370]
libB_seq314052_[chr1:105787300-105787499]
libB_seq212481_[chr1:105787399-105787598]
libB_seq302865_[chr1:105897032-105897231]
libA_seq10615_[chr1:106125868-106126067]
libA_seq278375_[chr1:107394262-107394461]
libA_seq116383_[chr1:107622396-107622595]
libA_seq164264_[chr1:107622410-107622609]
libB_seq47931_[chr1:107645174-107645373]
libB_seq103317_[chr1:108008445-108008644]
libA_seq56517_[chr1:108057145-108057344]
libB_seq178356_[chr1:108057621-108057820]
libA_seq1633_[chr1:108062125-108062324]
libA_seq88152_[chr1:108065907-108066106]	ZNF263,ZNF432	-1.1224499999999988,-0.08999999999999986	ancestral,ancestral	0.0367,0.0444	1,1
libB_seq110928_[chr1:108066033-108066232]
libA_seq15078_[chr1:108066352-108066551]
libB_seq11275_[chr1:108066648-108066847]
libA_seq83038_[chr1:108083605-108083804]	KLF6,SP2,SP3,SP4,ZNF281,ZNF432,ZNF467,ZNF880	0.6020000000000003,-5.743780000000001,-2.8240500000000015,-3.3606300000000005,-4.216499999999999,-0.6199999999999992,-1.5203999999999995,-2.361160000000001	both,ancestral,ancestral,ancestral,ancestral,both,ancestral,both	0.0447,0.0222,0.0408,0.0468,0.0489,0.0202,0.0274,0.0257	0.0377,1,1,1,1,0.0228,1,0.0417
libA_seq30722_[chr1:108180237-108180436]
libB_seq47228_[chr1:108180527-108180726]
libA_seq271497_[chr1:108180926-108181125]
libB_seq314535_[chr1:108181377-108181576]	ZNF235	-0.46079	ancestral	0.0418	1
libB_seq260988_[chr1:108182567-108182766]
libB_seq175785_[chr1:108183560-108183759]
libB_seq105265_[chr1:108183731-108183930]	ZNF235,ZNF287	0.8137000000000008,1.166690000000001	both,both	0.0306,0.0217	0.0246,0.0163
libA_seq142164_[chr1:108183784-108183983]	ZNF235,ZNF287	0.8137000000000008,1.166690000000001	both,both	0.0306,0.0217	0.0246,0.0163
libA_seq120111_[chr1:108184213-108184412]
libA_seq144716_[chr1:108188218-108188417]
libB_seq23655_[chr1:108188246-108188445]
libB_seq262346_[chr1:108193757-108193956]
libA_seq50393_[chr1:108194164-108194363]
libA_seq287414_[chr1:108336877-108337076]	VEZF1,ZNF235,ZNF263,ZNF287,ZNF432,ZNF487	1.133370000000001,-1.2058,-0.05109999999999992,-2.8509,0.48999999999999844,-7.919189999999999	both,both,both+both,both+both,both+both,ancestral	0.0315,0.0209,0.0307,0.0146,0.0188,0.0481	0.0229,0.0294,0.031,0.0287,0.017,1
libB_seq12451_[chr1:109108668-109108867]
libB_seq279280_[chr1:109725610-109725809]
libB_seq158849_[chr1:109753494-109753693]
libA_seq133796_[chr1:110335152-110335351]	HKR1,SP2,SP3,WT1,ZNF467,ZNF780A	2.5793999999999997,1.8925800000000006,1.444420000000001,2.0206600000000012,0.8148100000000014,1.0618000000000016	both,derived,both,both,derived,both	0.0699,1,0.0626,0.0359,1,0.0494	0.0418,0.0454,0.0481,0.0245,0.03,0.0383
libA_seq54421_[chr1:110703053-110703252]	ZNF432	-2.64	both	0.0278	0.0416
libA_seq149943_[chr1:110769456-110769655]	FLI1,ZBTB17,ZNF132	-4.2783500000000005,-3.8073700000000006,-0.8264999999999993	both,ancestral,both	0.0292,0.023,0.0377	0.0482,1,0.0408
libA_seq68685_[chr1:110778413-110778612]	ZNF768	-2.5464	both	0.0415	0.0792
libB_seq14691_[chr1:110886961-110887160]
libA_seq13852_[chr1:110888294-110888493]
libA_seq76704_[chr1:110893175-110893374]
libB_seq191245_[chr1:111463793-111463992]
libB_seq47712_[chr1:111470000-111470199]
libB_seq27748_[chr1:111470032-111470231]
libA_seq23438_[chr1:111470222-111470421]	ZNF341,ZNF432,ZNF880	-1.7212699999999987,-1.9699999999999998,1.4444	both,ancestral,both	0.0368,0.0333,0.0248	0.0526,1,0.0185
libB_seq249551_[chr1:111740625-111740824]
libB_seq57894_[chr1:113431269-113431468]	EGR2,HKR1,KLF15,KLF6,MAZ,PATZ1,PRDM9,SP1,SP2,SP3,VEZF1,WT1,ZBTB17,ZNF180,ZNF263,ZNF432,ZNF467,ZNF529,ZNF770,ZNF774	-3.812899999999999,-1.3925999999999998,-1.8453599999999986,-1.6020000000000003,-4.457099999999999,1.0563300000000009,-2.093499999999999,-0.5773199999999985,-0.9174000000000007,-0.9908000000000001,-2.5999999999999996,-4.288680000000001,1.2569,-3.074110000000001,-6.639189999999999,-1.67,-4.540799999999999,-7.71429,-4.857139999999999,-2.0182	both,both,ancestral,both,both+both,derived,both+both,both,both,both,ancestral+both,ancestral,both+both,ancestral,both+both,both,both+both,ancestral,ancestral,both	0.0234,0.0482,0.0431,0.049,0.0069900000000000006,1,0.0137,0.0417,0.0278,0.0464,0.00955,0.0235,0.0215,0.0425,0.0242,0.00337,0.0119,0.0365,0.0372,0.0253	0.0543,0.0642,1,0.0725,0.0232,0.0376,0.022000000000000002,0.0451,0.0326,0.0558,0.021,1,0.0147,1,0.0804,0.00548,0.0338,1,1,0.0456
libA_seq81252_[chr1:113431279-113431478]	EGR2,HKR1,KLF15,KLF6,MAZ,PATZ1,PRDM9,SP1,SP2,SP3,VEZF1,WT1,ZBTB17,ZNF180,ZNF263,ZNF432,ZNF467,ZNF529,ZNF770,ZNF774	-3.812899999999999,-1.3925999999999998,-1.8453599999999986,-1.6020000000000003,-4.457099999999999,1.0563300000000009,-2.093499999999999,-0.5773199999999985,-0.9174000000000007,-0.9908000000000001,-2.5999999999999996,-4.288680000000001,1.2569,-3.074110000000001,-6.639189999999999,-1.67,-4.540799999999999,-7.71429,-4.857139999999999,-2.0182	both,both,ancestral,both,both+both,derived,both+both,both,both,both,ancestral+both,ancestral,both+both,ancestral,both+both,both,both+both,ancestral,ancestral,both	0.0234,0.0482,0.0431,0.049,0.0069900000000000006,1,0.0137,0.0417,0.0278,0.0464,0.00955,0.0235,0.0215,0.0425,0.0242,0.00337,0.0119,0.0365,0.0372,0.0253	0.0543,0.0642,1,0.0725,0.0232,0.0376,0.022000000000000002,0.0451,0.0326,0.0558,0.021,1,0.0147,1,0.0804,0.00548,0.0338,1,1,0.0456
libB_seq55432_[chr1:113438997-113439196]	ZNF432	-2.11	both+both	0.00832	0.0134
libA_seq290137_[chr1:113453290-113453489]
libB_seq104533_[chr1:113453420-113453619]	PRDM6,ZNF235	-4.3592999999999975,-4.313689999999999	ancestral+both,both+both	0.00996,0.0123	0.0451,0.0424
libA_seq61515_[chr1:113467638-113467837]
libA_seq170478_[chr1:113469868-113470067]
libB_seq107298_[chr1:113470927-113471126]	PRDM9	2.22426	both	0.0533	0.0348
libB_seq167078_[chr1:113471203-113471402]
libB_seq185414_[chr1:113476129-113476328]	ZNF235,ZNF287	1.2156999999999982,-0.026309999999998723	both+both,both+both	0.00778,0.0216	0.00466,0.0217
libA_seq316557_[chr1:113477501-113477700]
libA_seq289125_[chr1:113478674-113478873]
libA_seq93985_[chr1:113484242-113484441]
libA_seq206706_[chr1:113487729-113487928]
libB_seq284963_[chr1:113489622-113489821]	ZNF263,ZNF467	0.6224499999999988,0.36110999999999827	derived,both	1,0.03	0.0408,0.0278
libA_seq86271_[chr1:113490857-113491056]
libA_seq74663_[chr1:113495375-113495574]
libA_seq40051_[chr1:113497658-113497857]
libB_seq8046_[chr1:113554062-113554261]
libB_seq142623_[chr1:113554768-113554967]	ZNF785,ZSCAN16	-1.48454,0.6862999999999992	both,both+both	0.0101,0.0039299999999999995	0.0136,0.00303
libA_seq31200_[chr1:113554909-113555108]
libB_seq31645_[chr1:113555305-113555504]	ZNF212,ZNF287	-5.142859999999999,-1.1315800000000005	both+both,both	0.0204,0.0272	0.0441,0.0345
libB_seq3836_[chr1:113555607-113555806]
libA_seq235996_[chr1:113559867-113560066]
libA_seq39006_[chr1:114234047-114234246]
libA_seq114256_[chr1:114241682-114241881]	SP2,ZBTB17	2.6529000000000007,0.2110000000000003	both,both	0.0408,0.0466	0.0248,0.0441
libB_seq308281_[chr1:114476323-114476522]	ZNF432	-3.21	ancestral	0.0276	1
libB_seq262504_[chr1:114479556-114479755]
libB_seq87865_[chr1:114485684-114485883]
libB_seq320741_[chr1:114506864-114507063]
libB_seq321500_[chr1:114507228-114507427]
libA_seq321233_[chr1:114514753-114514952]	ZNF383	0.8333	both	0.0429	0.0385
libA_seq320538_[chr1:114515466-114515665]
libA_seq7531_[chr1:114516257-114516456]	ZNF287	-0.86842	ancestral	0.0293	1
libA_seq319389_[chr1:114642121-114642320]
libA_seq133372_[chr1:114642223-114642422]
libA_seq56145_[chr1:114643110-114643309]	ZNF580,ZNF774	4.847000000000001,3.5	both,derived	0.11199999999999999,1	0.0467,0.0377
libA_seq83662_[chr1:114643164-114643363]	FLI1,ZNF580,ZNF774	-4.309330000000001,4.847000000000001,3.5	ancestral,both,derived	0.0406,0.11199999999999999,1	1,0.0467,0.0377
libA_seq37852_[chr1:114643210-114643409]	FLI1	-4.30933	ancestral	0.0406	1
libA_seq55138_[chr1:114643379-114643578]
libB_seq128133_[chr1:116086028-116086227]
libB_seq81073_[chr1:116204617-116204816]	PATZ1	0.5493	derived	1	0.0425
libA_seq124389_[chr1:116204698-116204897]
libB_seq166122_[chr1:116204781-116204980]
libB_seq96740_[chr1:116204819-116205018]
libB_seq130140_[chr1:116263346-116263545]
libB_seq205758_[chr1:116264630-116264829]	FLI1,PATZ1,SP2,SP3,SP4,WT1,ZBTB17,ZNF484	-6.051540000000001,0.42957999999999963,1.6198800000000002,1.9259200000000014,2.5983,1.9071899999999982,2.0183999999999997,0.5648	both+both,derived,derived,both,both,both,both,both	0.0403,1,1,0.0626,0.0667,0.0482,0.0471,0.0515	0.0735,0.0435,0.0478,0.0436,0.0411,0.0349,0.0279,0.046
libA_seq112942_[chr1:116274954-116275153]	KLF10,KLF15,KLF3,KLF6,KLF9,MAZ,PATZ1,PRDM9,SP1,SP2,SP3,SP4,VEZF1,WT1,ZBTB17,ZNF180,ZNF263,ZNF341,ZNF383,ZNF432,ZNF467,ZNF774,ZNF880	-8.40206,-0.43299999999999983,-7.989700000000001,-3.857100000000001,-9.907180000000002,-1.8141999999999996,-2.0282,-3.26166,-6.13402,-4.56198,-5.5832999999999995,-5.1394,-0.1999999999999993,-1.0722000000000005,-3.5504700000000007,-3.638910000000001,-0.25510000000000055,-1.3689,-1.9258999999999986,-0.4899999999999993,-1.8876999999999988,-1.9817999999999998,-1.3796300000000015	ancestral,both+both,both,both+both,both,both+both,both+both,ancestral+ancestral,ancestral+ancestral,ancestral,ancestral+both,both,both+derived,ancestral+derived,ancestral,ancestral,both,both,both,both,both+both,both,ancestral	0.0339,0.0167,0.0161,0.0223,0.0398,0.00778,0.0107,0.0321,0.0412,0.0286,0.0193,0.0297,0.0114,0.0273,0.025,0.0376,0.0403,0.027999999999999997,0.0155,0.03,0.00519,0.040999999999999995,0.0316	1,0.018000000000000002,0.0902,0.0596,0.17800000000000002,0.0126,0.0172,1,1,1,0.0604,0.0755,0.0122,0.0332,1,1,0.0425,0.0368,0.0198,0.0322,0.00852,0.0625,1
libB_seq41441_[chr1:116711102-116711301]	PRDM9,SP2,ZNF304,ZNF93	1.9718999999999998,1.9422000000000015,9.158900000000001,3.2143000000000015	both,both+both,both,both+both	0.0333,0.0435,0.0757,0.0293	0.022000000000000002,0.0311,0.009559999999999999,0.0188
libB_seq121527_[chr1:116751055-116751254]	ZNF212	9.29594	both	0.0557	0.0137
libA_seq268018_[chr1:116753670-116753869]
libA_seq70879_[chr1:117213198-117213397]
libB_seq314481_[chr1:118258026-118258225]
libA_seq73298_[chr1:118296460-118296659]
libA_seq15158_[chr1:118305065-118305264]	IRF3,PRDM6,ZNF235,ZNF287	2.833359999999999,1.8057800000000004,1.7352600000000002,1.1052999999999997	derived,derived,derived,both+both	1,1,1,0.0145	0.0492,0.0498,0.0301,0.0106
libA_seq157290_[chr1:118312859-118313058]
libA_seq272589_[chr1:118315065-118315264]
libA_seq33529_[chr1:118315434-118315633]
libB_seq238918_[chr1:118316801-118317000]
libA_seq321767_[chr1:118558533-118558732]
libB_seq318123_[chr1:118558567-118558766]
libA_seq259650_[chr1:118562244-118562443]
libA_seq306115_[chr1:118571473-118571672]
libB_seq289347_[chr1:118576460-118576659]
libB_seq295560_[chr1:118577280-118577479]
libA_seq284845_[chr1:118579962-118580161]
libB_seq211235_[chr1:118590009-118590208]
libB_seq37643_[chr1:118590560-118590759]
libB_seq224024_[chr1:118591123-118591322]
libA_seq257821_[chr1:118603487-118603686]
libA_seq288520_[chr1:118605317-118605516]
libA_seq233288_[chr1:118631779-118631978]	ZNF212	6.15302	both	0.0596	0.0254
libB_seq317293_[chr1:118634198-118634397]
libB_seq33951_[chr1:118637346-118637545]
libA_seq116978_[chr1:118637469-118637668]
libA_seq90973_[chr1:118641710-118641909]	PRDM6	2.32038	derived	1	0.0432
libA_seq6785_[chr1:118642726-118642925]
libA_seq163978_[chr1:118647039-118647238]
libB_seq68081_[chr1:118967215-118967414]
libB_seq245484_[chr1:119128091-119128290]
libA_seq184755_[chr1:119128766-119128965]
libB_seq210278_[chr1:119129897-119130096]
libA_seq222871_[chr1:119132896-119133095]
libA_seq157623_[chr1:119135416-119135615]
libA_seq236644_[chr1:119145876-119146075]
libA_seq177359_[chr1:119146180-119146379]
libA_seq82379_[chr1:119148138-119148337]
libB_seq200182_[chr1:119148384-119148583]
libB_seq81226_[chr1:146948170-146948369]
libB_seq201467_[chr1:146948171-146948370]
libA_seq63908_[chr1:146985834-146986033]
libB_seq256670_[chr1:146989172-146989371]
libA_seq51815_[chr1:146989379-146989578]
libB_seq92371_[chr1:150018957-150019156]	CTCF,ZNF182,ZNF225,ZNF384,ZNF487	-1.813699999999999,-5.3858999999999995,-9.323230000000002,-2.2843,-9.24242	ancestral+both,ancestral+ancestral,both,ancestral+ancestral,both	0.0187,0.0396,0.0367,0.0236,0.0203	0.0484,1,0.0722,1,0.0641
libA_seq280796_[chr1:151993215-151993414]
libB_seq223827_[chr1:151993216-151993415]
libB_seq185137_[chr1:152672159-152672358]
libA_seq190461_[chr1:152720099-152720298]
libA_seq91672_[chr1:152721870-152722069]
libA_seq92903_[chr1:152723610-152723809]
libB_seq96154_[chr1:152723729-152723928]
libA_seq64103_[chr1:152726614-152726813]
libB_seq290108_[chr1:153480868-153481067]	MAZ,VEZF1,WT1,ZNF180,ZNF212,ZNF263,ZNF341,ZNF467,ZNF774,ZNF880,ZNF93	-2.507100000000001,-3.606,-3.0722000000000005,-3.24071,5.173489999999999,-2.226800000000001,2.7459000000000007,-1.979589999999999,-2.0273000000000003,0.32407000000000163,-1.950000000000001	both+both,both,both,ancestral,both,both+both,both,ancestral+ancestral,both,derived,both	0.00405,0.0053,0.0182,0.040999999999999995,0.0798,0.0314,0.0475,0.0246,0.0159,1,0.0387	0.00829,0.0161,0.0332,1,0.0427,0.0454,0.0268,1,0.0256,0.0395,0.0555
libB_seq321715_[chr1:153751770-153751969]	MAZ,PRDM9,ZNF432,ZNF444,ZNF467,ZNF880	-1.628499999999999,0.42050000000000054,-3.7300000000000004,-4.814439999999999,-0.5277800000000008,-0.9167000000000005	both,both,ancestral,both+both,ancestral+ancestral,both	0.0125,0.0364,0.0253,0.049,0.0316,0.0199	0.0193,0.0339,1,0.0718,1,0.024
libA_seq219638_[chr1:153971562-153971761]	EGR2,KLF10,KLF11,KLF15,KLF5,KLF6,MAZ,PATZ1,PAX5,PRDM9,SP1,SP2,SP3,SP4,VEZF1,WT1,ZBTB17,ZNF180,ZNF281,ZNF467,ZNF484,ZNF880	4.5539999999999985,4.1752,3.9690399999999997,-0.24739999999999895,0.31959999999999944,-0.6123000000000012,-0.38569999999999993,-1.6548999999999978,-3.0405999999999977,-1.8691199999999988,-2.7423,-1.6363800000000008,-1.0185000000000013,2.1064999999999987,0.5515000000000008,1.3091999999999988,0.9816000000000003,-2.703710000000001,3.010299999999999,-1.6111000000000004,-0.1296999999999997,3.148110000…	both+both,both,both,both+both,both,both,both+both,both+both,both,both+both,both+both,both+both,both,both,both+both,both+both,both+both,ancestral,both,both+both,both,derived+derived	0.053,0.0974,0.0639,0.0206,0.0416,0.0087,0.00359,0.00719,0.0128,0.0336,0.018000000000000002,0.0399,0.0408,0.0601,0.00922,0.0353,0.0393,0.0446,0.0598,0.007509999999999999,0.049,1	0.018000000000000002,0.0428,0.0425,0.0213,0.0403,0.0087,0.00403,0.0107,0.0461,0.0482,0.027999999999999997,0.053,0.0501,0.0408,0.00797,0.0276,0.0303,1,0.0384,0.0108,0.0496,0.0218
libA_seq202279_[chr1:153971604-153971803]	EGR2,KLF10,KLF11,KLF15,KLF5,KLF6,MAZ,PATZ1,PAX5,PRDM9,SP1,SP2,SP3,SP4,VEZF1,WT1,ZBTB17,ZNF180,ZNF281,ZNF467,ZNF484,ZNF880	4.5539999999999985,4.1752,3.9690399999999997,-0.24739999999999895,0.31959999999999944,-0.6123000000000012,-0.38569999999999993,-1.6548999999999978,-3.0405999999999977,-1.8691199999999988,-2.7423,-1.6363800000000008,-1.0185000000000013,2.1064999999999987,0.5515000000000008,1.3091999999999988,0.9816000000000003,-2.703710000000001,3.010299999999999,-1.6111000000000004,-0.1296999999999997,3.148110000…	both+both,both,both,both+both,both,both,both+both,both+both,both,both+both,both+both,both+both,both,both,both+both,both+both,both+both,ancestral,both,both+both,both,derived+derived	0.053,0.0974,0.0639,0.0206,0.0416,0.0087,0.00359,0.00719,0.0128,0.0336,0.018000000000000002,0.0399,0.0408,0.0601,0.00922,0.0353,0.0393,0.0446,0.0598,0.007509999999999999,0.049,1	0.018000000000000002,0.0428,0.0425,0.0213,0.0403,0.0087,0.00403,0.0107,0.0461,0.0482,0.027999999999999997,0.053,0.0501,0.0408,0.00797,0.0276,0.0303,1,0.0384,0.0108,0.0496,0.0218
libB_seq180666_[chr1:154012622-154012821]
libA_seq152785_[chr1:154062749-154062948]	PRDM6	2.0194	both	0.0278	0.0136
libB_seq207002_[chr1:154072134-154072333]	PRDM6,ZNF235,ZNF287	-0.3592999999999993,1.2058600000000013,-1.596499999999999	ancestral+derived,derived,both	0.0396,1,0.00899	0.0443,0.0348,0.0143
libA_seq9493_[chr1:154114206-154114405]
libB_seq112307_[chr1:154710963-154711162]
libB_seq16354_[chr1:156719901-156720100]
libA_seq239195_[chr1:157054915-157055114]	ZNF235,ZNF287	2.5686,3.1403	both+both,both+both	0.00214,0.00811	0.0006889999999999999,0.00305
libA_seq254973_[chr1:157055597-157055796]
libB_seq85563_[chr1:157059518-157059717]	ZNF383	5.17593	both	0.0816	0.0466
libA_seq12299_[chr1:157107968-157108167]	SP2,ZNF529	-1.5619999999999994,-5.8571	both,both	0.0306,0.0275	0.0402,0.0574
libA_seq296868_[chr1:157657839-157658038]
libB_seq256792_[chr1:157665282-157665481]	KLF15,MAZ,PRDM9,VEZF1,ZBTB17,ZNF212,ZNF263,ZNF432,ZNF774	-1.2577299999999996,-2.2571700000000003,-1.5140200000000013,-2.1939899999999994,-1.9358000000000004,9.357119999999998,-3.101989999999999,-1.6899999999999995,-2.799999999999999	ancestral,ancestral+ancestral,ancestral,both+both,both,both,ancestral+ancestral,both+both,ancestral	0.0486,0.0183,0.0449,0.0168,0.0254,0.0628,0.0443,0.0241,0.0453	1,1,1,0.0316,0.0425,0.0163,1,0.0315,1
libB_seq60355_[chr1:158153673-158153872]	MAZ	0.96428	derived	1	0.0253
libA_seq120933_[chr1:159180297-159180496]
libA_seq87285_[chr1:159180365-159180564]
libB_seq276175_[chr1:160694341-160694540]	FLI1,HKR1,KLF15,KLF3,KLF6,MAZ,PRDM9,SP2,SP3,VEZF1,WT1,ZBTB17,ZNF180,ZNF263,ZNF341,ZNF467,ZNF880	1.5464000000000002,6.8223800000000026,1.4226800000000006,4.742299999999998,2.4999800000000008,0.7928599999999992,1.467290000000001,2.322280000000001,1.75,1.3454499999999996,2.061860000000001,2.1468000000000007,2.1852,2.9388000000000005,0.7377000000000002,4.166710000000001,-0.9629600000000016	both,derived,derived,both,derived,derived,derived,derived,both+both,derived,derived+derived,both+both,both,both+both,both+both,derived+derived,ancestral	0.0605,1,1,0.0814,1,1,1,1,0.0443,1,1,0.0436,0.0416,0.045,0.00632,1,0.0346	0.0441,0.0335,0.0469,0.0312,0.046,0.0263,0.0452,0.042,0.0298,0.0242,0.0361,0.0243,0.0273,0.0225,0.00515,0.0151,1
libB_seq158028_[chr1:162293845-162294044]
libA_seq275727_[chr1:162485258-162485457]
libB_seq231776_[chr1:162881863-162882062]	CTCF,PRDM6,ZNF182,ZNF225,ZNF235,ZNF287,ZNF384	-5.17643,-3.932079999999999,-3.2455999999999996,-3.29291,-3.2941600000000015,-2.6666999999999987,0.0	ancestral,ancestral,ancestral,both,ancestral+ancestral,both+both,both+both	0.0187,0.0267,0.0396,0.0473,0.0192,0.00466,0.0236	1,1,1,0.0713,1,0.0103,0.0236
libA_seq189792_[chr1:163605099-163605298]	ZSCAN16	0.8529	both+both	0.000238	0.000181
libA_seq42337_[chr1:163706467-163706666]
libB_seq65033_[chr1:165207710-165207909]	ZNF263,ZNF432	0.2550600000000003,1.04	both,derived	0.0363,1	0.0345,0.0384
libA_seq275933_[chr1:167396997-167397196]
libB_seq40422_[chr1:168355950-168356149]	KLF15,MAZ,SP1,SP4,ZNF341	-2.5360999999999994,-1.4571699999999996,-3.0618600000000002,-0.8689,-3.8114999999999988	both,ancestral,both,both,both+both	0.0235,0.0223,0.0426,0.0443,0.0254	0.0389,1,0.0622,0.0526,0.0547
libB_seq206710_[chr1:168429018-168429217]
libA_seq51056_[chr1:168431428-168431627]	ZNF780A	-2.6804	both	0.0494	0.0941
libA_seq163952_[chr1:168431456-168431655]	ZNF780A	-2.6804	both	0.0494	0.0941
libB_seq153841_[chr1:168431887-168432086]	FLI1,ZBTB17,ZNF132,ZNF263,ZNF287,ZNF341,ZNF432,ZNF880	-6.072161,-1.1375700000000002,-3.818200000000001,-2.3571299999999997,0.5087699999999993,-0.9098699999999997,-1.8600000000000012,-1.9073899999999995	both,ancestral,both,ancestral,derived+derived,both,both,both+both	0.0494,0.0471,0.0466,0.0279,1,0.0421,0.00426,0.0217	0.0846,1,0.087,1,0.0316,0.0502,0.00716,0.0323
libB_seq70816_[chr1:168433748-168433947]
libA_seq235184_[chr1:168434800-168434999]
libA_seq136832_[chr1:168434824-168435023]
libB_seq232863_[chr1:168435552-168435751]	ZBTB26,ZNF432,ZNF880	-3.153100000000002,-2.37,-0.3148099999999996	both,both,both	0.0191,0.021,0.0394	0.0531,0.0305,0.0419
libB_seq133732_[chr1:168435681-168435880]	ZNF212	0.22449	both	0.0155	0.0149
libA_seq180091_[chr1:168436141-168436340]
libA_seq150460_[chr1:168436388-168436587]	ZNF235,ZNF287	-1.3039000000000005,-1.815789999999999	both+both,both	0.0112,0.0181	0.0172,0.0275
libA_seq229216_[chr1:168436987-168437186]
libB_seq30943_[chr1:168762400-168762599]
libA_seq28575_[chr1:168764559-168764758]	FLI1,KLF15,MAZ,PATZ1,PRDM9,RBAK,VEZF1,WT1,ZNF263,ZNF341,ZNF398,ZNF432,ZNF467,ZNF484,ZNF529,ZNF774	6.051549,6.84537,-3.4142600000000005,1.2393999999999998,-1.3177600000000007,-3.5779999999999994,-1.3879000000000001,-1.5360900000000015,5.193889999999998,-0.9099000000000004,-4.134,1.7399999999999993,5.796299999999999,-2.4259999999999984,-4.163269999999999,1.0000000000000018	both,derived,ancestral+derived,both,both,both,both+both,ancestral+ancestral,derived+derived,both+both,both,both+derived,ancestral+both,both,both,both	0.0805,1,0.0104,0.0224,0.0458,0.0476,0.009059999999999999,0.0403,1,0.0275,0.0101,0.0367,0.0126,0.0231,0.0204,0.0215	0.0461,0.0163,0.0254,0.017,0.0584,0.115,0.013999999999999999,1,0.0263,0.0332,0.0332,0.0278,0.00309,0.0341,0.0366,0.0181
libB_seq130929_[chr1:168765378-168765577]
libB_seq216813_[chr1:169545314-169545513]
libA_seq48933_[chr1:170468362-170468561]
libB_seq89797_[chr1:171223729-171223928]	PRDM9	5.4019	both	0.0157	0.00348
libB_seq24460_[chr1:171731571-171731770]
libA_seq77501_[chr1:171736228-171736427]
libA_seq27805_[chr1:171736707-171736906]
libA_seq56721_[chr1:172164400-172164599]
libB_seq39606_[chr1:173156438-173156637]
libA_seq137529_[chr1:173191976-173192175]
libA_seq44735_[chr1:173196035-173196234]
libB_seq218779_[chr1:173196473-173196672]	SP4	-1.6312	both	0.045	0.062
libA_seq220901_[chr1:174938430-174938629]
libB_seq14627_[chr1:174962557-174962756]	PRDM6	-1.4272	both	0.0309	0.0472
libB_seq246256_[chr1:174988892-174989091]
libB_seq211146_[chr1:175042057-175042256]	EGR1,EGR2,KLF1,KLF11,KLF15,KLF3,KLF5,KLF6,MAZ,PATZ1,PRDM9,RREB1,SALL4,SP1,SP2,SP3,SP4,VEZF1,WT1,ZBTB17,ZNF132,ZNF180,ZNF263,ZNF281,ZNF341,ZNF432,ZNF444,ZNF467,ZNF529,ZNF580,ZNF770,ZNF880	-0.8143999999999991,-1.3812999999999995,-1.381400000000001,-8.185559999999999,-5.185600000000001,-1.1236999999999995,-2.0,-2.2551000000000005,-1.1213999999999977,-2.4154999999999998,-3.411200000000001,-9.773200000000001,-5.7684999999999995,-5.061899999999998,-1.148699999999998,-1.6204,-2.1393999999999984,-4.4788,-2.835000000000001,-5.009099999999998,-5.3801999999999985,-3.9814999999999987,-2.4694…	both,ancestral+both,both+both,both,both+both,both,both,both,both+both,both+both,ancestral+both,both,ancestral,both+both,both+both,both+both,both+both,both+derived,both+both,both+both,both,both+both,both+both,ancestral+ancestral,both+both,ancestral+derived,both+both,both+both,both+both,both,both,both+both	0.0376,0.0237,0.0437,0.0415,0.0038,0.0236,0.0403,0.02,0.00109,0.00823,0.0144,0.00942,0.0451,0.00371,0.00945,0.00763,0.0213,0.0044399999999999995,0.00639,0.0102,0.0256,0.0132,0.00635,0.0268,0.0233,0.0322,0.0172,0.003,0.0243,0.037000000000000005,0.0325,0.0101	0.0448,0.0334,0.0536,0.0769,0.0135,0.0317,0.0632,0.0352,0.00139,0.0143,0.031,0.0489,1,0.0202,0.0129,0.00983,0.0351,0.0177,0.0114,0.04,0.0679,0.0287,0.0126,1,0.0456,0.032,0.0213,0.008159999999999999,0.057,0.0928,0.0244,0.0199
libB_seq298565_[chr1:176650468-176650667]
libB_seq302037_[chr1:176650962-176651161]
libA_seq59934_[chr1:176657792-176657991]
libA_seq184706_[chr1:176658796-176658995]
libB_seq22931_[chr1:176660813-176661012]
libB_seq52635_[chr1:176666351-176666550]
libB_seq303138_[chr1:176765043-176765242]	ZNF287	1.76316	derived+derived	1	0.0243
libA_seq47426_[chr1:176768897-176769096]	ZNF780A	7.9588	derived	1	0.0383
libB_seq79783_[chr1:176769314-176769513]
libB_seq309827_[chr1:177972856-177973055]	CTCF,ZNF182,ZNF384	-2.4901999999999997,0.0,-1.7451000000000008	ancestral+both,both+both,both+both	0.0187,0.0396,0.0236	0.0632,0.0396,0.0722
libB_seq81057_[chr1:178685170-178685369]	ZSCAN16	5.92157	derived	1	0.0315
libB_seq39991_[chr1:178805221-178805420]
libB_seq187553_[chr1:178829992-178830191]
libA_seq182546_[chr1:181968642-181968841]
libB_seq110617_[chr1:181970226-181970425]
libA_seq312305_[chr1:182377082-182377281]	EGR2,MAZ,PATZ1,SP2,SP3,VEZF1,WT1,ZNF180,ZNF263,ZNF341,ZNF432,ZNF467,ZNF529,ZNF770,ZNF880	-3.5251899999999985,-2.9285700000000006,-2.09858,-3.958680000000001,-3.8611500000000003,-3.0847999999999995,-3.7938100000000006,-2.9444999999999997,-2.948999999999998,-2.311399999999999,-3.369999999999999,-4.4815000000000005,-3.4693899999999998,-2.4795999999999996,-0.009260000000001156	ancestral,ancestral+ancestral,both+both,ancestral,ancestral,both+both,both+both,both,both+both,both+both,both,both+both,both,both,ancestral	0.0358,0.0152,0.0262,0.0316,0.0319,0.00277,0.0259,0.0166,0.0155,0.0161,0.0129,0.00698,0.0421,0.009770000000000001,0.042	1,1,0.0434,1,1,0.008020000000000001,0.0514,0.0305,0.0322,0.0262,0.0244,0.0191,0.0632,0.0214,1
libA_seq151057_[chr1:182448988-182449187]	ZNF879,ZSCAN16	-5.209099999999999,-0.22549000000000063	both,both	2.7300000000000003e-05,0.0408	0.000573,0.0426
libA_seq146435_[chr1:182571204-182571403]	PATZ1,VEZF1,WT1,ZNF341,ZNF432	-0.2746499999999994,0.55152,-1.0824800000000003,-0.0411999999999999,-2.280000000000001	ancestral,both,ancestral,both,both+both	0.0453,0.0328,0.0435,0.0392,0.0179	1,0.0285,1,0.0393,0.0262
libA_seq65295_[chr1:182574511-182574710]	ZNF529	7.53062	derived	1	0.0366
libB_seq32353_[chr1:182575811-182576010]
libB_seq110388_[chr1:183118141-183118340]	PRDM9	1.00935	both	0.0565	0.0471
libB_seq106561_[chr1:183229523-183229722]
libB_seq100613_[chr1:184407330-184407529]
libA_seq289958_[chr1:185812812-185813011]
libB_seq206966_[chr1:186705496-186705695]
libB_seq65809_[chr1:187460440-187460639]
libB_seq208304_[chr1:187460441-187460640]
libA_seq183866_[chr1:187523429-187523628]
libB_seq73819_[chr1:187523438-187523637]
libB_seq290797_[chr1:187708563-187708762]
libA_seq285181_[chr1:187723644-187723843]
libB_seq224299_[chr1:188931174-188931373]	ZNF341	0.4836	derived	1	0.0495
libB_seq310062_[chr1:189086893-189087092]
libB_seq210814_[chr1:189595548-189595747]	ZNF384	-2.2941	both+both	0.0236	0.0945
libB_seq236146_[chr1:191262309-191262508]
libB_seq101498_[chr1:192511371-192511570]
libA_seq136439_[chr1:192512001-192512200]	FLI1,IRF3,KLF15,KLF6,MAZ,PATZ1,VEZF1,WT1,ZBTB17,ZNF212,ZNF235,ZNF263,ZNF287,ZNF341,ZNF432,ZNF467,ZNF880	-1.247399999999999,-2.4602999999999984,-2.536100000000001,-2.3979999999999997,-1.1928,-2.4084100000000017,0.26670000000000016,-0.8453999999999997,-2.1375699999999984,4.775550000000001,1.245099999999999,-1.7652999999999999,1.4999800000000008,1.245899999999999,0.05000000000000071,-2.1837000000000018,-1.6296999999999997	both,both,both+both,both,both+both,both+both,both+both,both,both,derived,both,both+both,both+both,both+both,both+both,both+both,both+both	0.0493,0.0234,0.0136,0.0272,0.00823,0.0233,0.008579999999999999,0.0155,0.0366,1,0.0328,0.00853,0.0189,0.0352,0.00278,0.00464,0.0122	0.0639,0.0368,0.0228,0.0507,0.0115,0.0417,0.00795,0.0182,0.0614,0.0484,0.0231,0.0137,0.0129,0.0274,0.00274,0.00828,0.0167
libA_seq224221_[chr1:192512910-192513109]	ZNF212	4.73473	derived	1	0.0488
libB_seq206859_[chr1:192513101-192513300]	ZNF432	1.75	both	0.0425	0.0323
libB_seq35734_[chr1:192513973-192514172]
libB_seq119556_[chr1:193872101-193872300]	ZNF235	1.3137	both	0.0222	0.0148
libA_seq56698_[chr1:193872114-193872313]	ZNF235	1.3137	both	0.0222	0.0148
libA_seq220193_[chr1:195256419-195256618]	PRDM6,ZNF235,ZNF287	-2.1164799999999993,-5.2450600000000005,-4.096530000000001	ancestral,ancestral+ancestral,both+both	0.0455,0.0106,0.006220000000000001	1,1,0.0193
libB_seq228294_[chr1:195256513-195256712]
libA_seq137495_[chr1:195256971-195257170]
libB_seq285142_[chr1:195257054-195257253]
libB_seq72013_[chr1:195257954-195258153]
libB_seq240665_[chr1:195262708-195262907]
libA_seq238745_[chr1:195276753-195276952]
libA_seq233790_[chr1:195276915-195277114]	ZNF785,ZSCAN16	0.8247,-2.7058000000000035	both+both,both+both	0.00415,0.00011	0.0034,0.000302
libB_seq313035_[chr1:195278473-195278672]
libA_seq108953_[chr1:195289852-195290051]
libB_seq138960_[chr1:195291554-195291753]
libA_seq86559_[chr1:195297357-195297556]
libA_seq310707_[chr1:195304373-195304572]	ZNF235	-2.24505	both	0.0261	0.046
libB_seq31998_[chr1:195310919-195311118]
libA_seq249664_[chr1:195996770-195996969]	PRDM6,VEZF1,ZNF212,ZNF263,ZNF287,ZNF432,ZNF467,ZNF880	3.0290999999999997,1.7697500000000002,5.857139999999999,3.8350399999999993,1.6315799999999996,3.7300000000000004,1.870370000000002,0.722220000000001	both,derived+derived,both+both,both+both,both,derived,derived+derived,derived+derived	0.0724,1,0.0509,0.0716,0.0267,1,1,1	0.0322,0.0213,0.0213,0.0348,0.0181,0.0253,0.0241,0.0366
libB_seq269003_[chr1:196339585-196339784]	ZNF384	-2.1863	both+both	0.0236	0.086
libA_seq19096_[chr1:196634041-196634240]	ZNF287	0.42105	derived	1	0.0322
libB_seq37425_[chr1:198891824-198892023]
libB_seq8966_[chr1:201035196-201035395]	HKR1,ZNF283,ZNF320	0.5606999999999971,1.7777999999999992,1.5978999999999992	both,both,both+both	0.0316,0.0587,0.0586	0.0288,0.0465,0.0488
libA_seq29167_[chr1:201276399-201276598]	EGR2,FLI1,MAZ,PRDM9,SP2,VEZF1,WT1,ZBTB17,ZNF180,ZNF263,ZNF341,ZNF383,ZNF467,ZNF768,ZNF770,ZNF774	-1.9425000000000008,-0.948500000000001,-0.021430000000000504,-1.3831800000000003,-2.50408,-2.2180999999999997,-2.6082800000000006,-1.7431,-3.9259700000000004,-1.6224299999999996,-0.6966999999999999,0.009299999999999642,1.7407400000000015,8.721699999999998,3.91838,-0.23639999999999972	both,both,ancestral,ancestral+ancestral,both,both,ancestral,both,both,ancestral,ancestral,both,derived+derived,both+both,both,both	0.0329,0.0439,0.0317,0.0461,0.0347,0.00834,0.0328,0.0309,0.0324,0.0333,0.0477,0.0175,1,0.149,0.0754,0.0431	0.0501,0.0532,1,1,0.0529,0.0161,1,0.0481,0.0604,1,1,0.0175,0.0247,0.0312,0.0397,0.0462
libB_seq20674_[chr1:201924395-201924594]	PATZ1,SP1,ZNF180,ZNF304,ZNF432	0.2676000000000016,6.876320000000001,2.509260000000001,0.7850000000000001,0.8099999999999996	both,both,derived,both,derived	0.0411,0.0864,1,0.03,1	0.0387,0.0358,0.0463,0.0255,0.0399
libA_seq237274_[chr1:201932044-201932243]
libA_seq316469_[chr1:201932593-201932792]
libB_seq195703_[chr1:201933355-201933554]
libB_seq201875_[chr1:201937351-201937550]
libA_seq22637_[chr1:201938001-201938200]
libA_seq21033_[chr1:201938998-201939197]
libB_seq221276_[chr1:201943010-201943209]
libB_seq1492_[chr1:203055157-203055356]
libA_seq135700_[chr1:203342540-203342739]
libA_seq150607_[chr1:203342852-203343051]	HKR1,KLF15,MAZ,PATZ1,PRDM9,VEZF1,WT1,ZBTB17,ZNF263,ZNF341,ZNF432,ZNF467,ZNF770,ZNF774,ZNF880	2.7101999999999986,7.37117,5.350000000000001,2.6267300000000002,1.69158,2.4666999999999994,1.4536100000000012,1.12847,4.306100000000001,3.1557999999999993,7.369999999999999,5.34263,0.8060999999999989,3.572799999999999,2.1111000000000004	both,derived,both+both,derived+derived,both,both+both,derived,derived+derived,both+both,both,derived+derived,both+both,both,derived,both+both	0.0645,1,0.0215,1,0.0519,0.0203,1,1,0.0297,0.0438,1,0.0261,0.0464,1,0.0106	0.0382,0.0146,0.00509,0.0258,0.0372,0.00958,0.0407,0.0472,0.01,0.0226,0.0128,0.00825,0.040999999999999995,0.0373,0.00648
libB_seq57537_[chr1:203615267-203615466]	ZNF235,ZNF287	2.5489999999999995,-2.359639999999999	both+both,both	0.0221,0.00978	0.0102,0.0186
libA_seq150232_[chr1:204261188-204261387]
libA_seq229598_[chr1:204369378-204369577]	CTCF,ZNF182,ZNF235,ZNF287,ZNF384	-4.372499999999999,-2.5526,-2.6176600000000008,-2.1666599999999985,-2.1584000000000003	ancestral+both,both+both,ancestral,ancestral+ancestral,ancestral+ancestral	0.0187,0.0396,0.0234,0.022000000000000002,0.0452	0.1,0.0533,1,1,1
libB_seq68417_[chr1:207474266-207474465]	ZNF212,ZNF384	-3.32653,-2.0883000000000003	both,ancestral+ancestral	0.021,0.0291	0.0351,1
libA_seq55676_[chr1:207474298-207474497]	ZNF212,ZNF384	-3.32653,-2.0883000000000003	both,ancestral+ancestral	0.021,0.0291	0.0351,1
libB_seq12211_[chr1:207627775-207627974]
libB_seq298945_[chr1:209518516-209518715]	PRDM6,ZNF212	-0.7281000000000013,4.7244399999999995	both,both	0.0316,0.05	0.0393,0.0252
libB_seq319102_[chr1:210518729-210518928]
libA_seq137542_[chr1:213098394-213098593]
libA_seq68540_[chr1:213098419-213098618]	EGR2,HKR1,PATZ1,VEZF1,ZNF263,ZNF774	2.6618899999999996,0.6636000000000006,1.1408300000000011,1.3515499999999996,5.5361199999999995,7.318199999999997	derived,both,derived,derived,derived,derived	1,0.0384,1,1,1,1	0.0436,0.0336,0.0367,0.0242,0.032,0.013999999999999999
libA_seq170264_[chr1:213098427-213098626]	EGR2,HKR1,PATZ1,VEZF1,ZNF263,ZNF774	2.6618899999999996,0.6636000000000006,1.1408300000000011,1.3515499999999996,5.5361199999999995,7.318199999999997	derived,both,derived,derived,derived,derived	1,0.0384,1,1,1,1	0.0436,0.0336,0.0367,0.0242,0.032,0.013999999999999999
libA_seq267723_[chr1:213098490-213098689]	EGR2,HKR1,PATZ1,VEZF1,ZNF263,ZNF774	2.6618899999999996,0.6636000000000006,1.1408300000000011,1.3515499999999996,5.5361199999999995,7.318199999999997	derived,both,derived,derived,derived,derived	1,0.0384,1,1,1,1	0.0436,0.0336,0.0367,0.0242,0.032,0.013999999999999999
libB_seq303693_[chr1:214983808-214984007]	ZNF235,ZNF287	1.3137000000000008,2.56137	both+both,both+derived	0.0102,0.0281	0.00618,0.0153
libA_seq3098_[chr1:215923228-215923427]
libB_seq239819_[chr1:216023230-216023429]
libB_seq168966_[chr1:217982831-217983030]
libB_seq295295_[chr1:219625691-219625890]
libA_seq12502_[chr1:220707088-220707287]
libA_seq122620_[chr1:222882800-222882999]	EGR2,MAZ,PRDM9,VEZF1,WT1,ZNF212,ZNF263,ZNF341,ZNF432,ZNF467,ZNF880	-5.9137,-2.3714700000000004,-8.046760000000003,-2.47875,-1.9587699999999995,-6.05102,-2.6530299999999993,-1.1557399999999998,-3.4699999999999998,-1.0092600000000003,-3.5648100000000005	both,ancestral+ancestral,ancestral+ancestral,ancestral+ancestral,ancestral,both,ancestral,both,both,ancestral,ancestral	0.0148,0.0176,0.0108,0.0174,0.0369,0.0133,0.026000000000000002,0.0426,0.0188,0.0288,0.0204	0.0608,1,1,1,1,0.0348,1,0.0535,0.0325,1,1
libB_seq49800_[chr1:226165200-226165399]
libB_seq189775_[chr1:226635475-226635674]	ZNF287	-0.48245	ancestral	0.0319	1
libA_seq43223_[chr1:227383706-227383905]	CTCF,ZNF384	-5.17643,0.0	ancestral,both+both	0.0187,0.0236	1,0.0236
libB_seq212513_[chr1:227881586-227881785]
libA_seq255020_[chr1:228943502-228943701]
libA_seq202006_[chr1:229139748-229139947]
libA_seq57139_[chr1:229364994-229365193]
libA_seq238998_[chr1:229809354-229809553]
libB_seq213108_[chr1:229899619-229899818]	ZNF212	2.9898	both	0.0547	0.0361
libA_seq243672_[chr1:229900200-229900399]	PATZ1,PRDM9,WT1,ZNF180,ZNF341,ZNF467,ZNF880	0.3592000000000013,1.5887900000000013,0.25774000000000186,1.1296300000000006,0.4181000000000008,0.5510200000000003,-0.7315100000000001	both,both,derived,both,both,derived+derived,both+both	0.0266,0.0519,1,0.0548,0.035,1,0.0271	0.0241,0.038,0.0499,0.0469,0.0322,0.0336,0.0312
libA_seq140157_[chr1:229902529-229902728]
libB_seq98301_[chr1:229902721-229902920]
libA_seq86147_[chr1:229904098-229904297]
libA_seq288294_[chr1:229907980-229908179]
libB_seq152628_[chr1:229908988-229909187]
libB_seq126241_[chr1:230292743-230292942]
libA_seq121557_[chr1:230292749-230292948]
libB_seq219374_[chr1:230292980-230293179]
libB_seq157191_[chr1:230296374-230296573]	CTCF,ZNF235,ZNF287	-4.588230000000001,-3.4608000000000008,-2.8508999999999993	ancestral,both+both,both+both	0.0291,0.00785,0.00137	1,0.0231,0.0037
libA_seq111079_[chr1:230299290-230299489]
libA_seq215295_[chr1:230302111-230302310]
libB_seq315771_[chr1:230815191-230815390]
libA_seq52972_[chr1:230837647-230837846]	HKR1,KLF15,MAZ,PRDM9,SP2,WT1,ZNF467,ZNF548	-6.700980000000001,-2.3608699999999994,-0.5142800000000012,-7.43926,-2.9917800000000003,-4.855680000000001,-1.7347000000000001,-3.0832999999999977	ancestral,ancestral,ancestral+ancestral,ancestral,ancestral,ancestral,both+both,both	0.0335,0.0395,0.0281,0.0128,0.0377,0.0208,0.00521,0.0272	1,1,1,1,1,1,0.00828,0.0557
libB_seq37627_[chr1:230837712-230837911]	HKR1,KLF15,MAZ,PRDM9,SP2,WT1,ZNF467,ZNF548	-6.700980000000001,-2.3608699999999994,-0.5142800000000012,-7.43926,-2.9917800000000003,-4.855680000000001,-1.7347000000000001,-3.0832999999999977	ancestral,ancestral,ancestral+ancestral,ancestral,ancestral,ancestral,both+both,both	0.0335,0.0395,0.0281,0.0128,0.0377,0.0208,0.00521,0.0272	1,1,1,1,1,1,0.00828,0.0557
libB_seq119987_[chr1:230859337-230859536]
libA_seq296714_[chr1:230859900-230860099]
libB_seq25086_[chr1:230860519-230860718]
libA_seq28079_[chr1:231559631-231559830]
libA_seq296017_[chr1:231562738-231562937]
libA_seq103839_[chr1:231827469-231827668]	HKR1,MAZ,PATZ1,PRDM9,SP2,SP4,VEZF1,ZNF263,ZNF341,ZNF432,ZNF467,ZNF529,ZNF548,ZNF880	-2.3177000000000003,-1.24287,-1.7535000000000007,-2.8037800000000015,-2.6364,-1.5246000000000013,-2.0726999999999993,-0.7755100000000006,-1.8033000000000001,0.8499999999999996,-0.8469300000000013,-3.7857100000000004,-0.27779999999999916,-1.6574000000000026	both,ancestral,both+both,both,both,both,both+both,ancestral,both+both,both,ancestral,both,both,both+both	0.0481,0.0235,0.0199,0.0259,0.0286,0.0408,0.00606,0.0397,0.0267,0.0264,0.0315,0.049,0.0461,0.00539	0.0741,1,0.0302,0.0451,0.0448,0.055,0.0118,1,0.0383,0.0232,1,0.07400000000000001,0.051,0.00788
libA_seq226562_[chr1:232090251-232090450]	ZNF287	-0.07017	ancestral	0.0347	1
libA_seq249955_[chr1:232961623-232961822]	ZNF235	0.11765	derived	1	0.045
libA_seq177533_[chr1:233077826-233078025]
libB_seq46084_[chr1:233077827-233078026]
libA_seq282164_[chr1:234315327-234315526]
libB_seq233805_[chr1:234692673-234692872]	ZNF792	-9.91751	both	0.0356	0.097
libB_seq35402_[chr1:235134030-235134229]	ZNF283	0.3981	both	0.0465	0.0463
libB_seq76566_[chr1:236048287-236048486]
libB_seq138718_[chr1:236054422-236054621]
libB_seq38599_[chr1:236055801-236056000]
libB_seq210602_[chr1:236056470-236056669]
libA_seq290085_[chr1:236058831-236059030]
libB_seq18708_[chr1:236294125-236294324]
libB_seq51928_[chr1:236314192-236314391]
libA_seq290562_[chr1:236424208-236424407]
libA_seq223314_[chr1:236475693-236475892]	EGR2,FLI1,KLF10,KLF15,KLF6,MAZ,PATZ1,PRDM9,SP1,SP2,SP3,SP4,VEZF1,WT1,ZBTB17,ZNF132,ZNF180,ZNF263,ZNF281,ZNF341,ZNF383,ZNF432,ZNF444,ZNF467,ZNF529,ZNF770,ZNF880	3.6187000000000005,-9.876290000000001,8.319560000000001,-2.1030999999999977,-1.7245000000000008,-3.8070999999999984,-1.7535000000000007,-8.7477,7.0412300000000005,9.515500000000001,-1.2685999999999993,6.122999999999999,-3.636400000000002,-1.9380999999999986,2.8808000000000007,-4.8347,-1.9629600000000016,-3.9072199999999997,-6.1134,-1.8114999999999988,-4.0277400000000005,-1.1900000000000013,-9.907…	both,both+both,derived,both+both,both,both+both,both+derived,both+both,derived+derived,both+both,both+both,both,both+both,both+both,ancestral+both,both,both,ancestral+ancestral,both+both,ancestral+ancestral,both,both+both,both+both,both+both,both,both+both,both+both	0.0375,0.0286,1,0.00515,0.0193,0.0035299999999999997,0.0132,0.000734,1,0.114,0.0205,0.0747,0.0011300000000000001,0.00639,0.0213,0.0377,0.0449,0.0425,0.0452,0.0373,0.0401,0.00863,0.0366,0.00545,0.0282,0.0177,0.00466	0.0148,0.0799,0.0339,0.0086,0.0307,0.0103,0.0193,0.0126,0.0347,0.0276,0.0254,0.0238,0.0034200000000000003,0.00982,0.00995,0.0776,0.0595,1,0.0914,1,0.0651,0.0114,0.0839,0.0147,0.0877,0.00486,0.027000000000000003
libA_seq74225_[chr1:237543087-237543286]
libA_seq203265_[chr1:237684369-237684568]
libA_seq292868_[chr1:237698169-237698368]	CTCF,ZNF182,ZNF235,ZNF384	-4.568630000000001,-2.5526999999999997,-0.7353000000000005,-2.4117999999999995	ancestral,both+both,ancestral,ancestral+ancestral	0.0291,0.0396,0.0393,0.0236	1,0.0396,1,1
libA_seq172556_[chr1:237860311-237860510]	MAZ,PRDM9,VEZF1,ZNF263,ZNF432,ZNF467,ZNF770,ZNF880	-1.8785699999999999,-9.0093,-1.3878000000000004,3.7755300000000016,-0.7100000000000009,2.0092600000000003,3.5612399999999997,-2.4907100000000018	ancestral,both,both,derived,both+both,derived,derived,both+both	0.0201,0.0026899999999999997,0.0176,1,0.011000000000000001,1,1,0.0194	1,0.0296,0.0265,0.0201,0.0127,0.0235,0.0454,0.0322
libB_seq78576_[chr1:238463633-238463832]	ZNF287	1.1316	both+both	0.0115	0.00838
libA_seq196570_[chr1:238886514-238886713]
libB_seq243149_[chr1:238886988-238887187]	ZNF235	0.8922	both	0.0448	0.0364
libA_seq297875_[chr1:238887691-238887890]	ZNF235,ZNF287	-1.5489999999999995,-3.1754999999999995	both+both,both+both	0.0091,0.004370000000000001	0.0146,0.0112
libA_seq271883_[chr1:238888063-238888262]	CTCF,ZNF235,ZNF287,ZNF823	4.41173,-1.8333600000000008,0.9299,-2.9908	derived,ancestral,both+both,both	1,0.0292,0.00865,0.0314	0.0335,1,0.006690000000000001,0.0756
libB_seq260204_[chr1:238888152-238888351]	CTCF,ZNF235,ZNF287,ZNF823	4.41173,-1.8333600000000008,0.9299,-2.9908	derived,ancestral,both+both,both	1,0.0292,0.00865,0.0314	0.0335,1,0.006690000000000001,0.0756
libA_seq126674_[chr1:239601114-239601313]
libB_seq241172_[chr1:239729709-239729908]
libB_seq181260_[chr1:239733860-239734059]
libA_seq297401_[chr1:240232942-240233141]
libB_seq120105_[chr1:240233660-240233859]	ZNF181	-2.5556	both	0.0292	0.0834
libB_seq184793_[chr1:240235186-240235385]
libB_seq216239_[chr1:240235511-240235710]
libB_seq258190_[chr1:240236392-240236591]
libA_seq193265_[chr1:240620272-240620471]
libA_seq103604_[chr1:240646963-240647162]
libA_seq131247_[chr1:240672912-240673111]	IRF3,MAZ,PATZ1,VEZF1,WT1,ZNF263,ZNF341,ZNF383,ZNF432,ZNF467,ZNF529,ZNF770,ZNF880	-1.1586999999999996,4.4571000000000005,3.112630000000001,-0.03640000000000043,3.5979399999999995,5.357119999999998,1.8033000000000001,3.1110999999999986,0.6199999999999974,2.8981100000000017,4.3673,5.47958,1.0740000000000016	both,both+both,derived,both+both,both,both+both,both+both,both,both+both,derived+derived,both,both,both+both	0.0389,0.0217,1,0.0061,0.0385,0.0417,0.0307,0.0294,0.00286,1,0.0301,0.0585,0.00466	0.0482,0.00656,0.0229,0.0061600000000000005,0.0194,0.0117,0.0219,0.017,0.0024100000000000002,0.0199,0.0161,0.0193,0.0034200000000000003
libA_seq283606_[chr1:240689177-240689376]
libA_seq312996_[chr1:241100552-241100751]	MAZ,ZNF383,ZNF432	1.4142700000000001,0.3425900000000013,0.8900000000000006	derived,both,both	1,0.0481,0.0232	0.0226,0.0466,0.0196
libB_seq265176_[chr1:241317694-241317893]
libB_seq228135_[chr1:241326691-241326890]	HKR1,KLF15,PATZ1,SP2,SP3,WT1,ZBTB17,ZNF180,ZNF263,ZNF383,ZNF467	-0.0840999999999994,2.4535699999999983,2.260530000000001,2.7024800000000013,2.342550000000001,0.5979400000000012,1.275269999999999,2.546260000000002,0.4184000000000001,3.9352300000000007,2.040800000000001	both,derived,derived,derived,derived,derived,derived,both,both,both,both+both	0.028999999999999998,1,1,1,1,1,1,0.0501,0.0444,0.0652,0.0205	0.028999999999999998,0.0385,0.0284,0.0396,0.045,0.0467,0.0457,0.0327,0.0402,0.0407,0.0128
libB_seq285212_[chr1:241789640-241789839]	ZNF235,ZNF287	0.529399999999999,4.184239999999999	both+both,derived+derived	0.0187,1	0.016,0.0132
libB_seq92082_[chr1:242009787-242009986]	PRDM9	-1.2336	both+both	0.0148	0.0198
libA_seq126605_[chr1:242207771-242207970]
libA_seq139839_[chr1:242722984-242723183]	PRDM6,ZNF235	-1.79608,-0.13729999999999976	ancestral,both+both	0.05,0.0332	1,0.0345
libB_seq41762_[chr1:242723405-242723604]	EGR2	3.8418	both	0.0643	0.0276
libA_seq24567_[chr1:242724328-242724527]
libB_seq185351_[chr1:242725006-242725205]
libB_seq148097_[chr1:244454510-244454709]	KLF10,KLF11,MAZ,PRDM9,ZNF263,ZNF341,ZNF432,ZNF467	2.927839999999998,2.8659,-1.0571000000000002,-2.458000000000002,-1.3468999999999998,-2.3114999999999988,1.0899999999999999,-1.540799999999999	both,both,both,both,both+both,ancestral,derived,both+both	0.0615,0.0425,0.0181,0.00021600000000000002,0.0232,0.0339,1,0.0162	0.0463,0.0371,0.0236,0.00082,0.0329,1,0.0384,0.0231
libA_seq181294_[chr1:244756687-244756886]
libB_seq60430_[chr1:244756882-244757081]
libB_seq60102_[chr1:244758547-244758746]	ZNF341	0.9836	derived	1	0.0453
libA_seq310236_[chr1:245237955-245238154]	CTCF	2.2941	both	0.0376	0.0187
libA_seq35992_[chr1:245254386-245254585]
libB_seq42663_[chr1:245417443-245417642]
libA_seq91894_[chr1:245505027-245505226]	KLF15,MAZ,PATZ1,RXRA,SP1,VEZF1,ZNF263,ZNF341,ZNF467,ZNF880	2.1958,-0.9285999999999994,0.26759999999999984,2.5571,5.42268,0.5273000000000003,3.2755300000000016,0.9589999999999996,1.0,0.824069999999999	both,both,both,both,derived,both,derived,both,both+both,both	0.0281,0.0115,0.0286,0.0812,1,0.0238,1,0.0298,0.0261,0.0361	0.0181,0.0149,0.0266,0.0449,0.0451,0.0206,0.0226,0.025,0.0214,0.0303
libB_seq91205_[chr1:245778246-245778445]
libB_seq229876_[chr1:246025510-246025709]
libA_seq151514_[chr1:246113933-246114132]
libB_seq286956_[chr1:246256808-246257007]	PATZ1	-0.52817	ancestral	0.0426	1
libB_seq141751_[chr1:246691929-246692128]	ZNF212,ZNF235,ZNF287,ZNF341	8.45922,2.8920999999999992,3.070169999999999,-1.6884999999999994	derived,both,derived,ancestral	1,0.031,1,0.0383	0.0284,0.0132,0.0177,1
libB_seq239773_[chr1:246814757-246814956]
libA_seq122988_[chr1:246819657-246819856]
libB_seq305861_[chr1:246819837-246820036]	ZNF235,ZNF384	-1.7745000000000015,-1.4215999999999998	both+both,ancestral	0.00587,0.0441	0.0112,1
libA_seq127082_[chr1:246824075-246824274]	HKR1	-0.9906	both	0.00928	0.0144
libA_seq92758_[chr1:246827044-246827243]
libB_seq138932_[chr1:246838097-246838296]
libB_seq234099_[chr1:246890716-246890915]
libA_seq312370_[chr1:246893209-246893408]
libA_seq110130_[chr1:246895528-246895727]
libA_seq170372_[chr1:246896734-246896933]
libA_seq153423_[chr1:246897903-246898102]
libA_seq227689_[chr1:246898735-246898934]	ZNF212,ZNF235,ZNF287	0.8775499999999994,-1.3333600000000008,2.0438599999999987	both,ancestral,derived	0.0509,0.0334,1	0.0448,1,0.0226
libA_seq68799_[chr1:246899495-246899694]
libB_seq307571_[chr1:246902558-246902757]
libA_seq225483_[chr1:246905457-246905656]
libA_seq66900_[chr1:246907141-246907340]
libB_seq24688_[chr1:246910089-246910288]
libB_seq304869_[chr1:246914367-246914566]
libA_seq88438_[chr1:247147914-247148113]	ZNF235,ZNF287	0.08830000000000027,-0.5175000000000001	both+both,both	0.0123,0.00842	0.012,0.00975
libA_seq225011_[chr1:247148397-247148596]	ZSCAN16	0.15686	both	0.0428	0.0414
libA_seq197303_[chr1:247653997-247654196]
libA_seq159107_[chr1:247670128-247670327]
libA_seq245350_[chr1:248227346-248227545]
libA_seq220531_[chr1:249076474-249076673]
libA_seq313500_[chr1:249077559-249077758]
libA_seq153440_[chr10:161889-162088]	KLF6,SP2,SP3,VEZF1,WT1,ZBTB17,ZNF180,ZNF341,ZNF432,ZNF467,ZNF770,ZNF780A,ZNF880	0.7449000000000012,1.5371999999999986,0.4443999999999999,-0.8787000000000003,0.8453600000000012,0.8714999999999993,1.0555000000000003,-0.09839999999999982,-0.4900000000000002,-1.1296300000000015,-0.7347000000000019,0.07219999999999871,-2.3425999999999974	both,both,both,both,both,both,both+both,both,both,ancestral+ancestral,both,both,both+both	0.0203,0.0269,0.0309,0.00757,0.0466,0.0583,0.0374,0.0364,0.0166,0.0281,0.0326,0.0446,0.00417	0.0153,0.0197,0.0277,0.009729999999999999,0.0407,0.047,0.031,0.037000000000000005,0.0184,1,0.0376,0.0439,0.00717
libA_seq209893_[chr10:308147-308346]
libA_seq229681_[chr10:469651-469850]	PATZ1,SP2,ZNF311,ZNF93	0.112680000000001,1.4545100000000009,4.3093,-1.0142999999999986	derived,both,both,both	1,0.055,0.0727,0.0457	0.047,0.0426,0.0353,0.057999999999999996
libA_seq191028_[chr10:954303-954502]	PRDM9	0.9066	both	0.0141	0.0111
libB_seq196274_[chr10:2782145-2782344]	ZNF548	0.1111	both	0.0419	0.041
libA_seq18459_[chr10:2992455-2992654]
libB_seq245142_[chr10:2996096-2996295]
libA_seq166283_[chr10:3001041-3001240]
libA_seq158843_[chr10:3002579-3002778]
libA_seq211019_[chr10:3132755-3132954]	PRDM9	-1.07477	both	0.045	0.0548
libB_seq267521_[chr10:3132767-3132966]	PRDM9	-1.07477	both	0.045	0.0548
libA_seq313143_[chr10:3288840-3289039]	ZNF432	-4.39	ancestral+ancestral	0.0231	1
libA_seq262527_[chr10:3289026-3289225]
libB_seq203481_[chr10:3289095-3289294]
libB_seq116133_[chr10:3290866-3291065]
libA_seq69555_[chr10:3295007-3295206]
libA_seq9867_[chr10:3295033-3295232]
libB_seq316738_[chr10:3300346-3300545]
libA_seq100316_[chr10:3310158-3310357]	ZNF529	9.73465	both	0.0622	0.0177
libB_seq271286_[chr10:3316464-3316663]
libA_seq256094_[chr10:3317309-3317508]
libB_seq21807_[chr10:3318138-3318337]	KLF15,KLF6,MAZ,VEZF1,WT1,ZNF263,ZNF383,ZNF432,ZNF467,ZNF484	3.62887,0.8876999999999988,0.33570999999999884,0.8969000000000005,1.5876300000000008,2.561300000000001,1.8148100000000014,2.88,2.7499800000000008,7.231530000000001	derived,both,derived+derived,both+both,derived+derived,both+both,both,both,both+both,derived	1,0.0474,1,0.021,1,0.018000000000000002,0.0449,0.0363,0.0299,1	0.0297,0.0377,0.0295,0.0161,0.0398,0.00911,0.0365,0.0233,0.0171,0.0361
libA_seq285125_[chr10:3461216-3461415]	PRDM9	-1.04669	ancestral+both	0.0335	0.0407
libB_seq280578_[chr10:3540094-3540293]	ZNF287	0.46491	both	0.0272	0.0247
libB_seq83295_[chr10:3672752-3672951]
libB_seq119146_[chr10:3674631-3674830]	ZNF432	-1.48	both	0.022	0.0276
libA_seq294615_[chr10:3679477-3679676]	IRF3,MAZ,PATZ1,ZNF467,ZNF880	-1.4286000000000012,1.2571700000000003,1.0141299999999998,1.3981399999999997,-0.20370000000000044	both,derived,derived,both+both,ancestral	0.0397,1,1,0.0265,0.0404	0.0524,0.0234,0.038,0.0203,1
libA_seq285289_[chr10:3681535-3681734]
libB_seq156851_[chr10:3682307-3682506]
libB_seq311643_[chr10:3697932-3698131]	KLF15,KLF6,MAZ,PATZ1,RREB1,SP1,SP2,SP3,VEZF1,WT1,ZBTB17,ZNF180,ZNF263,ZNF467	-0.2371199999999991,1.193900000000001,0.47850000000000037,5.4718800000000005,-9.41234,1.4123,4.50409,3.324089999999998,0.1575799999999994,3.165000000000001,0.12840000000000096,2.592599999999999,1.6326,1.8703700000000003	both,both,both+both,both,both,both,both,both,derived,both,both+both,derived,both,both+both	0.0472,0.0542,0.0116,0.0425,0.0372,0.048,0.0567,0.0645,1,0.0276,0.0418,1,0.0591,0.0306	0.0494,0.0416,0.0103,0.0122,0.078,0.0341,0.0254,0.0324,0.0335,0.0147,0.0403,0.0454,0.043,0.0211
libA_seq211434_[chr10:3788942-3789141]
libA_seq141637_[chr10:3868744-3868943]
libA_seq51682_[chr10:3983399-3983598]
libA_seq138726_[chr10:4731826-4732025]	PATZ1,VEZF1,ZNF180,ZNF432,ZNF467	-2.1479300000000006,-0.61815,-2.1852300000000007,-0.7000000000000002,-2.6122000000000005	ancestral+ancestral,ancestral,both,ancestral,ancestral+ancestral	0.0293,0.0297,0.0431,0.0405,0.0211	1,1,0.0591,1,1
libB_seq228884_[chr10:5359693-5359892]	SP2,ZNF263,ZNF383,ZNF432	2.3967300000000016,0.18369999999999997,3.768509999999999,0.16999999999999993	both+both,both+both,both,both	0.0555,0.0356,0.0731,0.0367	0.0373,0.0336,0.0485,0.0355
libB_seq36905_[chr10:7547560-7547759]	KLF15,KLF6,MAZ,PATZ1,SP1,SP3,SP4,VEZF1,WT1,ZBTB17,ZNF132,ZNF180,ZNF341,ZNF444,ZNF467,ZNF880	0.7423000000000002,-2.0204000000000004,0.9785999999999984,-2.070400000000001,-0.948500000000001,0.6852,0.5,2.193900000000001,0.9794,1.091800000000001,4.7934,2.046289999999999,1.8852899999999995,-3.927900000000001,2.6944899999999983,4.046310000000001	both+both,both,both,both,both+both,both+both,both,both+both,both,both,both,both,both+both,both+both,both+both,derived+derived	0.0148,0.0419,0.0152,0.0237,0.0187,0.0198,0.0366,0.0256,0.0128,0.0195,0.0845,0.0469,0.0498,0.0155,0.0228,1	0.0126,0.0672,0.0116,0.0392,0.021,0.016,0.0331,0.0137,0.0101,0.0138,0.0399,0.0331,0.0337,0.0243,0.0129,0.0184
libA_seq275668_[chr10:7590119-7590318]	KLF15,KLF6,MAZ,PATZ1,PRDM9,SP2,SP3,SP4,VEZF1,WT1,ZNF180,ZNF304,ZNF341,ZNF444,ZNF770	-3.226799999999999,-2.214270000000001,-2.16427,-3.0000300000000006,-6.71966,-3.7438000000000002,-1.8888500000000015,-3.2869100000000007,-2.87875,-1.9793900000000004,-2.97218,2.9064999999999994,-5.3093,-9.690724,-3.571399999999999	both,both,ancestral,ancestral,ancestral,both+both,ancestral,both,ancestral,ancestral+ancestral,both,both,ancestral+ancestral,both+both,both	0.0139,0.049,0.0186,0.0234,0.0148,0.026000000000000002,0.0495,0.045,0.0157,0.0368,0.0286,0.0587,0.0291,0.0385,0.0227	0.0266,0.0805,1,1,1,0.0511,1,0.0826,1,1,0.0481,0.0339,1,0.0879,0.0467
libB_seq292556_[chr10:7867447-7867646]
libB_seq259754_[chr10:8691400-8691599]	ZNF235,ZNF287	-2.2156599999999997,-1.3771899999999988	ancestral+ancestral,ancestral	0.0265,0.0264	1,1
libB_seq88190_[chr10:11020538-11020737]
libA_seq68419_[chr10:11021633-11021832]
libB_seq199121_[chr10:11021850-11022049]
libB_seq24994_[chr10:11114126-11114325]	FLI1,KLF15,MAZ,VEZF1,WT1,ZBTB17,ZNF212,ZNF263,ZNF398,ZNF432,ZNF467,ZNF774,ZNF823,ZNF880	-4.639199999999999,1.5154699999999997,1.8142999999999994,1.98785,5.27838,1.5871700000000004,-8.295960000000001,4.1134200000000005,0.9380999999999986,2.6500000000000004,2.5277600000000007,-0.20000000000000107,-1.2685000000000013,1.4907000000000004	both,derived,both+both,derived+derived,derived+derived,derived+derived,ancestral,derived+derived,both,derived+derived,both+both,both,both,both+both	0.0185,1,0.0143,1,1,1,0.028999999999999998,1,0.0233,1,0.0211,0.0372,0.0208,0.0144	0.0595,0.0462,0.00866,0.0201,0.0195,0.0424,1,0.0407,0.0172,0.0301,0.0122,0.0393,0.0333,0.0105
libA_seq79317_[chr10:11223679-11223878]
libA_seq220342_[chr10:11251662-11251861]	CTCF,ZNF182,ZNF384	-0.6077999999999992,1.1492000000000004,-2.0391999999999992	both+both,both,ancestral+ancestral	0.0187,0.0396,0.0291	0.0291,0.0396,1
libA_seq29610_[chr10:11963729-11963928]
libA_seq46616_[chr10:12806417-12806616]	PRDM9,ZNF529	-1.308399999999999,-3.4693900000000006	both,both	0.0261,0.0451	0.0339,0.066
libB_seq51270_[chr10:12831709-12831908]
libA_seq144597_[chr10:13603722-13603921]
libA_seq185343_[chr10:13623987-13624186]
libB_seq45769_[chr10:13702099-13702298]	SP3,SP4,WT1	-1.4723000000000006,-4.344299999999999,-2.14433	both,both,ancestral	0.0315,0.0278,0.0358	0.0442,0.0622,1
libA_seq301705_[chr10:13705199-13705398]	ZNF880	-2.3426	both	0.00886	0.0145
libB_seq215984_[chr10:14006459-14006658]
libB_seq97314_[chr10:14276136-14276335]	PRDM6,ZNF182,ZNF235,ZNF287,ZNF487	-0.8544,3.0526,-0.5,1.342080000000001,0.4949499999999998	ancestral+both,both,both+both,both+derived,both	0.0116,0.0997,0.0207,0.02,0.0353	0.0163,0.0396,0.024,0.0143,0.0326
libB_seq237341_[chr10:14290541-14290740]
libA_seq82343_[chr10:14818664-14818863]	KLF15,PRDM9,SP1,WT1,ZBTB17,ZNF383,ZNF467	-5.4639500000000005,-3.327119999999999,-3.4535600000000013,-5.1546,-3.65137,-6.851869999999999,-0.5555500000000002	ancestral+ancestral,both,ancestral,both,ancestral,ancestral,ancestral	0.0443,0.0303,0.0452,0.0116,0.0241,0.0391,0.0314	1,0.0567,1,0.0325,1,1,1
libB_seq3365_[chr10:14944724-14944923]
libB_seq170234_[chr10:15250250-15250449]	MAZ,PATZ1,ZNF263,ZNF383,ZNF432,ZNF529,ZNF93,ZSCAN30	0.7428999999999988,-0.9154999999999998,1.0,-2.7407400000000006,1.0099999999999998,9.2347,-1.0714000000000006,-8.722199999999999	both,both,derived+derived,both,derived,both,both+both,both	0.0245,0.0263,1,0.0486,1,0.0752,0.03,0.0285	0.0203,0.0332,0.0378,0.0664,0.0386,0.0241,0.0344,0.154
libA_seq167570_[chr10:15250287-15250486]	MAZ,PATZ1,ZNF263,ZNF383,ZNF432,ZNF529,ZNF93,ZSCAN30	0.7428999999999988,-0.9154999999999998,1.0,-2.7407400000000006,1.0099999999999998,9.2347,-1.0714000000000006,-8.722199999999999	both,both,derived+derived,both,derived,both,both+both,both	0.0245,0.0263,1,0.0486,1,0.0752,0.03,0.0285	0.0203,0.0332,0.0378,0.0664,0.0386,0.0241,0.0344,0.154
libB_seq88084_[chr10:15250514-15250713]
libB_seq1804_[chr10:15254063-15254262]
libA_seq59029_[chr10:15255094-15255293]
libB_seq31891_[chr10:15256552-15256751]
libA_seq22980_[chr10:15258108-15258307]
libA_seq270838_[chr10:15258880-15259079]
libB_seq152478_[chr10:15562593-15562792]	ZNF432	0.08	both	0.04	0.0394
libB_seq45553_[chr10:15562639-15562838]	ZNF432	0.08	both	0.04	0.0394
libB_seq48968_[chr10:15562687-15562886]	ZNF432	0.08	both	0.04	0.0394
libA_seq266586_[chr10:15563873-15564072]	MAZ,PATZ1,PRDM9,SP2,VEZF1,ZBTB17,ZNF263,ZNF341,ZNF432,ZNF467,ZNF880	-0.10713999999999935,-0.5282,0.2804000000000002,-0.8512400000000007,-2.424199999999999,-2.761470000000001,-4.336729999999999,-0.7377000000000002,-1.25,-3.5305999999999997,-3.7778100000000014	ancestral,both,both+both,both,both+both,ancestral,ancestral,both,both+both,both+both,ancestral+ancestral	0.031,0.0247,0.0397,0.0483,0.0114,0.0312,0.0173,0.0262,0.0108,0.00313,0.0194	1,0.0285,0.0374,0.0555,0.0231,1,1,0.0301,0.013999999999999999,0.00763,1
libA_seq49516_[chr10:15564378-15564577]	IRF3	-4.35714	both	0.0368	0.0823
libA_seq318199_[chr10:15564945-15565144]	ZNF235	-1.3137	both	0.0243	0.0349
libA_seq26905_[chr10:15567864-15568063]
libB_seq245299_[chr10:15567880-15568079]
libA_seq10893_[chr10:15751582-15751781]
libB_seq9264_[chr10:15820151-15820350]
libB_seq16970_[chr10:16047936-16048135]
libA_seq283077_[chr10:16129783-16129982]	CTCF,ZNF225,ZNF235,ZNF287,ZNF384,ZNF487	-5.17643,-3.3837899999999994,-1.5,-0.9123000000000001,-2.1862999999999992,-8.565660000000001	ancestral,both,both+both,both+both,both+both,both	0.0187,0.0473,0.0206,0.00982,0.0236,0.0217	1,0.0605,0.0314,0.0129,0.0895,0.0622
libA_seq70753_[chr10:16517873-16518072]
libB_seq13789_[chr10:16528479-16528678]	ASCL1	-7.8557	ancestral	0.0482	1
libA_seq12021_[chr10:16705413-16705612]
libB_seq8812_[chr10:16707747-16707946]
libA_seq248438_[chr10:17766579-17766778]	ZNF880	-0.26852	ancestral	0.04	1
libA_seq202258_[chr10:18511274-18511473]	ZNF212	-4.18363	both	0.0306	0.0552
libB_seq80486_[chr10:18522162-18522361]
libA_seq227977_[chr10:19661177-19661376]	ZNF235	-1.2059	both	0.0138	0.0201
libA_seq256803_[chr10:19776197-19776396]	CTCF,PRDM6,ZNF235,ZNF287,ZNF384,ZNF487	1.0489999999999995,-3.679599999999999,-3.0,-2.6052999999999997,-1.754900000000001,-8.828200000000002	ancestral+both,both+both,both+both,both+both,ancestral+ancestral,both+both	0.0484,0.0199,0.0034100000000000003,0.00198,0.0351,0.00282	0.0335,0.0596,0.011000000000000001,0.0047,1,0.0128
libA_seq176414_[chr10:20496703-20496902]
libA_seq174129_[chr10:20869458-20869657]
libA_seq27562_[chr10:21781183-21781382]
libA_seq7951_[chr10:21792699-21792898]
libA_seq123791_[chr10:21900783-21900982]
libA_seq191635_[chr10:21910508-21910707]	MAZ,PATZ1,PRDM9,WT1,ZNF263,ZNF432,ZNF467	-2.971399999999999,-1.253499999999999,-0.8317999999999994,-2.1546400000000006,-4.632630000000001,-4.35,-1.8367300000000002	both,both,both,ancestral,ancestral,ancestral,ancestral+ancestral	0.0149,0.0278,0.0289,0.0358,0.0159,0.0232,0.0255	0.0312,0.0373,0.0339,1,1,1,1
libB_seq281822_[chr10:21989108-21989307]
libA_seq208853_[chr10:21994729-21994928]
libB_seq293985_[chr10:22012495-22012694]	ZNF287,ZNF432	-0.6928999999999998,5.789999999999999	both+both,derived	0.00346,1	0.00428,0.0181
libA_seq210661_[chr10:22014160-22014359]
libA_seq209555_[chr10:22234767-22234966]
libA_seq138673_[chr10:22573108-22573307]
libA_seq94353_[chr10:22575721-22575920]
libB_seq236617_[chr10:22578340-22578539]	ZNF287	-0.72807	ancestral	0.0301	1
libB_seq104686_[chr10:23445432-23445631]
libA_seq204921_[chr10:24295982-24296181]	CTCF,PRDM6,ZNF182,ZNF235,ZNF287,ZNF384,ZNF487	-5.17643,-1.7087000000000003,-3.2455999999999996,-5.450900000000001,-5.622799999999998,-0.11759999999999948,-3.4140999999999995	ancestral,both+both,ancestral,both+both,both+both,both+both,both+both	0.0187,0.00618,0.0396,0.000697,0.000143,0.0236,0.0114	1,0.0116,1,0.008190000000000001,0.0012900000000000001,0.027000000000000003,0.0162
libB_seq73174_[chr10:24475967-24476166]
libB_seq41641_[chr10:24576603-24576802]
libA_seq160236_[chr10:25248855-25249054]	EGR2,KLF11,KLF15,KLF6,MAZ,PATZ1,PRDM9,SP1,SP2,SP3,VEZF1,WT1,ZBTB17,ZNF263,ZNF341,ZNF432,ZNF444,ZNF467,ZNF529,ZNF770,ZNF880	-4.064789999999999,-4.824720000000001,-3.5566999999999993,-2.11228,-1.5929000000000002,-1.0281000000000002,-7.467299999999998,-2.89691,-1.4545000000000012,-1.2963000000000005,0.06670000000000087,-3.1339799999999993,-1.4770000000000003,-2.2783800000000003,-2.9262999999999995,-3.130000000000001,2.072119999999998,-2.1327,-1.1938700000000004,1.234700000000002,1.648100000000003	ancestral,both,both,ancestral,both+both,both+both,both+both,both,both,both+both,both+both,both+both,both+both,both+both,both,both+both,both+both,both+both,both+both,both,both+both	0.0328,0.0415,0.00945,0.0497,0.000991,0.0228,0.00288,0.0451,0.0429,0.0384,0.00509,0.0283,0.00411,0.0444,0.0173,0.024,0.0411,0.0049,0.0345,0.0276,0.00581	1,0.0582,0.0205,1,0.00139,0.0295,0.022000000000000002,0.0635,0.0551,0.0501,0.00496,0.0492,0.00472,0.068,0.0314,0.0386,0.0383,0.00848,0.0396,0.0193,0.004
libA_seq164393_[chr10:25986702-25986901]
libA_seq76305_[chr10:27126262-27126461]
libA_seq146713_[chr10:27655979-27656178]
libB_seq231439_[chr10:27947913-27948112]
libB_seq187507_[chr10:27960292-27960491]
libB_seq16529_[chr10:28821794-28821993]	ZNF432	0.72	both	0.0265	0.0238
libA_seq204730_[chr10:28823471-28823670]
libA_seq131368_[chr10:28823750-28823949]
libA_seq185019_[chr10:28823785-28823984]
libB_seq97227_[chr10:28824183-28824382]
libB_seq206310_[chr10:28831470-28831669]
libA_seq123513_[chr10:28836610-28836809]	ZNF225	8.41416	both	0.112	0.0473
libB_seq300874_[chr10:28849326-28849525]
libB_seq274300_[chr10:28873414-28873613]	PRDM6,ZNF287,ZNF432	-2.0485799999999994,-0.18420000000000059,-0.3700000000000001	ancestral,both,ancestral	0.0463,0.0111,0.0425	1,0.0116,1
libB_seq83084_[chr10:28885576-28885775]	ZNF235	1.38236	derived	1	0.0331
libB_seq213702_[chr10:28886239-28886438]
libA_seq145816_[chr10:28896951-28897150]	ZNF287	-0.82456	ancestral	0.0296	1
libA_seq74769_[chr10:28899136-28899335]
libA_seq72635_[chr10:28899686-28899885]
libA_seq308619_[chr10:28906348-28906547]
libB_seq280798_[chr10:28917096-28917295]
libB_seq241476_[chr10:29491217-29491416]	ZNF432	-1.14	ancestral	0.0382	1
libB_seq311380_[chr10:30838825-30839024]	ZNF287,ZNF384	1.7193000000000005,2.1584000000000003	derived,derived	1,1	0.0245,0.0452
libA_seq169711_[chr10:31433384-31433583]
libB_seq37120_[chr10:31750778-31750977]
libA_seq42233_[chr10:31764228-31764427]
libB_seq59228_[chr10:31906278-31906477]	KLF15,MAZ,PRDM9,ZNF180,ZNF320,ZNF341,ZNF383,ZNF432,ZNF467	-0.2886500000000005,-1.5928699999999996,-1.3176999999999985,-3.462999999999999,-3.6083,0.03270000000000017,1.657399999999999,0.8499999999999996,-0.8469300000000013	both,ancestral,both,both+both,both+both,both,both,both,ancestral	0.0486,0.0215,0.00881,0.0134,0.0151,0.0464,0.0405,0.0381,0.0315	0.0511,1,0.0128,0.027000000000000003,0.0534,0.0462,0.0353,0.033,1
libA_seq220461_[chr10:32125423-32125622]
libB_seq273014_[chr10:32440511-32440710]	ZNF8	-0.6701	both	0.00425	0.00581
libA_seq193970_[chr10:34730046-34730245]
libB_seq311262_[chr10:34732797-34732996]
libA_seq31494_[chr10:34732874-34733073]
libA_seq139171_[chr10:34750016-34750215]
libB_seq242883_[chr10:34754044-34754243]
libA_seq268721_[chr10:34759293-34759492]
libA_seq318378_[chr10:34761351-34761550]	MAZ,PATZ1,PRDM9,VEZF1,ZNF263,ZNF341,ZNF432,ZNF467,ZNF880	-1.7714700000000008,-0.4084500000000002,-0.9533000000000005,-2.0303499999999985,-1.02041,-4.581999999999999,-8.24,-2.3610999999999986,-3.425910000000001	ancestral,ancestral,both+both,ancestral+ancestral,ancestral,ancestral+ancestral,both,both+both,ancestral+ancestral	0.0207,0.0438,0.0281,0.0198,0.0377,0.0219,0.00777,0.00472,0.0209	1,1,0.0336,1,1,1,0.0367,0.00808,1
libA_seq152451_[chr10:35042374-35042573]
libB_seq99276_[chr10:37510309-37510508]
libB_seq275758_[chr10:37533485-37533684]	MAZ,ZNF212,ZNF263,ZNF432,ZNF880	1.0,-5.785699999999999,-2.5408199999999983,-1.0099999999999998,0.2591999999999999	derived,ancestral+both,both,both+both,both+both	1,0.0298,0.0237,0.0156,0.017	0.0251,0.0639,0.0415,0.0189,0.0163
libB_seq141306_[chr10:37536875-37537074]	ZNF235,ZNF287,ZNF487	0.8137000000000008,0.8069999999999986,6.75758	both+both,both+both,both	0.00277,0.00392,0.0722	0.00198,0.0030399999999999997,0.0384
libB_seq134284_[chr10:37540551-37540750]
libB_seq259225_[chr10:37542907-37543106]
libB_seq296577_[chr10:37546979-37547178]	ZNF235	-2.38236	ancestral+ancestral	0.0252	1
libB_seq232519_[chr10:37548657-37548856]	PATZ1,VEZF1,ZBTB17,ZNF212,ZNF263,ZNF432,ZNF467,ZNF774,ZNF880	0.8380299999999998,1.0,1.4770900000000005,3.5612200000000014,0.5510000000000002,1.6999999999999993,1.4907499999999994,3.3819,1.7314800000000004	derived+derived,both,both,both+both,both+both,both+both,both+both,derived,derived+derived	1,0.0303,0.0618,0.0447,0.0264,0.0345,0.0348,1,1	0.0394,0.0226,0.0429,0.0264,0.0234,0.0266,0.0257,0.0397,0.0297
libA_seq259811_[chr10:37549089-37549288]
libA_seq207063_[chr10:37553571-37553770]
libA_seq231782_[chr10:47036594-47036793]
libA_seq90917_[chr10:47118770-47118969]
libA_seq142501_[chr10:48336758-48336957]	ZNF765	3.1852	both	0.0584	0.0206
libB_seq141152_[chr10:48340970-48341169]
libA_seq203575_[chr10:48353946-48354145]
libB_seq307263_[chr10:48361828-48362027]
libB_seq249327_[chr10:48364112-48364311]	ZNF529	2.47959	both	0.0616	0.0475
libB_seq177109_[chr10:49828231-49828430]	ZNF235,ZNF287	-0.6568700000000014,-1.7894699999999997	ancestral,ancestral	0.0399,0.0241	1,1
libA_seq51616_[chr10:49912913-49913112]	ZNF341,ZNF770	-1.5327999999999982,-2.122399999999999	ancestral,both	0.0399,0.0239	1,0.0381
libB_seq152705_[chr10:50498288-50498487]	FLI1,MAZ,WT1,ZNF235,ZNF287,ZNF341,ZNF432,ZNF467,ZNF774	0.4742000000000015,1.1214700000000004,0.7113400000000016,-0.7745100000000011,-0.9122799999999991,1.8278800000000004,0.6199999999999992,0.07407000000000163,3.5	both,derived,derived,ancestral,both,both,both+both,derived,derived	0.0413,1,1,0.039,0.0217,0.05,0.0152,1,1	0.0379,0.0243,0.046,1,0.0269,0.0342,0.013000000000000001,0.0347,0.0377
libA_seq172674_[chr10:50711529-50711728]
libA_seq321190_[chr10:50712838-50713037]	KLF15,MAZ,PATZ1,VEZF1,WT1,ZBTB17,ZNF263,ZNF281,ZNF341,ZNF398,ZNF467,ZNF880	3.288669999999999,4.7286,3.2253299999999996,3.8484,3.0205800000000007,0.990870000000001,3.2347300000000008,4.505199999999999,2.6884999999999994,4.700999999999999,7.92788,6.740699999999999	derived,both+both,derived,both,derived,derived,derived+derived,derived,both,both,derived+derived,both	1,0.0183,1,0.0157,1,1,1,1,0.0344,0.10099999999999999,1,0.0189	0.0324,0.00505,0.0222,0.00457,0.0306,0.0488,0.0228,0.0466,0.0207,0.0341,0.0372,0.00439
libB_seq212998_[chr10:50716200-50716399]
libA_seq179603_[chr10:50721296-50721495]	ZSCAN16	0.9804	both+both	0.0011	0.000791
libB_seq2681_[chr10:50722935-50723134]
libA_seq36637_[chr10:50727272-50727471]
libA_seq215666_[chr10:50727743-50727942]
libA_seq2775_[chr10:50732582-50732781]
libA_seq173235_[chr10:50781886-50782085]
libA_seq16536_[chr10:50819302-50819501]	OSR2,SP2,WT1,ZNF263,ZNF341,ZNF596	1.8519000000000005,0.8346999999999998,2.79378,2.938789999999999,0.5163999999999991,2.5513999999999992	both,both,derived+derived,derived,derived,both	0.105,0.0408,1,1,1,0.0654	0.0466,0.0357,0.0316,0.046,0.0492,0.0418
libA_seq10443_[chr10:50819614-50819813]	HKR1,MAZ,PATZ1,PRDM9,VEZF1,WT1,ZNF180,ZNF432,ZNF467,ZNF880	-2.3177000000000003,-2.85717,-0.35909999999999975,-1.308399999999999,-1.1332999999999984,-1.67009,-3.4814800000000004,-0.1800000000000015,-2.2245,0.435179999999999	both,ancestral,both+both,both+both,both,both+both,both,both,ancestral+ancestral,both+both	0.039,0.0155,0.0282,0.0206,0.00782,0.0264,0.0342,0.0203,0.0231,0.0353	0.0625,1,0.0309,0.0272,0.011000000000000001,0.036000000000000004,0.0598,0.0212,1,0.0321
libB_seq47526_[chr10:50861020-50861219]
libA_seq48457_[chr10:52064023-52064222]
libA_seq271479_[chr10:52768801-52769000]	ZNF225,ZNF235,ZNF384	-9.22221,-0.5686300000000006,-1.4314	both,ancestral,ancestral	0.0367,0.0407,0.0441	0.071,1,1
libA_seq178364_[chr10:52911719-52911918]	ZNF287	1.5	both	0.0344	0.0251
libA_seq260166_[chr10:53257182-53257381]
libA_seq23481_[chr10:54285235-54285434]
libA_seq62853_[chr10:54303172-54303371]
libA_seq285375_[chr10:54306869-54307068]	PRDM9	0.97197	derived	1	0.0495
libB_seq207759_[chr10:54317251-54317450]
libA_seq187405_[chr10:54317361-54317560]
libA_seq72405_[chr10:55280140-55280339]	PRDM9	0.71964	both	0.04	0.0348
libA_seq134315_[chr10:55459041-55459240]
libB_seq311338_[chr10:55478965-55479164]	PRDM6,ZNF235,ZNF287,ZNF432,ZNF487	1.495099999999999,3.4607399999999995,1.6928999999999998,-0.6199999999999992,9.050506	both,both,both+both,both,both	0.0498,0.0435,0.0137,0.0249,0.0575	0.0321,0.0169,0.00838,0.0274,0.0181
libB_seq257742_[chr10:55772830-55773029]
libB_seq137539_[chr10:56142713-56142912]
libA_seq280594_[chr10:56145967-56146166]
libA_seq149074_[chr10:56147457-56147656]
libA_seq290492_[chr10:56147692-56147891]
libA_seq205139_[chr10:56148045-56148244]	ZNF432	0.18	both	0.044	0.0428
libB_seq204910_[chr10:56406725-56406924]
libA_seq218012_[chr10:56406936-56407135]
libB_seq231749_[chr10:56446817-56447016]
libB_seq250617_[chr10:56543121-56543320]	FLI1,IRF3,PRDM6,ZNF212,ZNF225,ZNF235,ZNF287,ZNF432,ZNF880	13.43303,2.9920000000000027,-1.6213000000000015,5.142849999999999,-1.07071,-2.960799999999999,-1.403500000000001,3.129999999999999,0.472220000000001	derived,both+both,both+both,both,both,both+both,both+both,both+both,derived	1,0.0336,0.00201,0.0806,0.0473,0.00195,0.0013599999999999999,0.019,1	0.0366,0.0221,0.00461,0.0434,0.0554,0.00678,0.00227,0.00988,0.0385
libB_seq279892_[chr10:56543126-56543325]	FLI1,IRF3,PRDM6,ZNF212,ZNF225,ZNF235,ZNF287,ZNF432,ZNF880	13.43303,2.9920000000000027,-1.6213000000000015,5.142849999999999,-1.07071,-2.960799999999999,-1.403500000000001,3.129999999999999,0.472220000000001	derived,both+both,both+both,both,both,both+both,both+both,both+both,derived	1,0.0336,0.00201,0.0806,0.0473,0.00195,0.0013599999999999999,0.019,1	0.0366,0.0221,0.00461,0.0434,0.0554,0.00678,0.00227,0.00988,0.0385
libB_seq86200_[chr10:56546161-56546360]
libA_seq242570_[chr10:56547305-56547504]
libA_seq147578_[chr10:56547316-56547515]
libB_seq304306_[chr10:56739476-56739675]
libA_seq316053_[chr10:56990218-56990417]	ZNF235,ZNF287	0.7156900000000004,2.5	derived,derived	1,1	0.0394,0.0203
libB_seq69679_[chr10:56993783-56993982]	ZBTB26,ZNF785,ZSCAN16	-4.5306,-1.5773199999999994,-6.872540000000001	both,both+both,both+both	0.0142,0.008140000000000001,0.0106	0.0606,0.0118,0.0674
libA_seq201967_[chr10:58945367-58945566]
libB_seq134621_[chr10:59499221-59499420]
libB_seq78710_[chr10:59515425-59515624]	ZNF774	-1.1636	both	0.0245	0.0362
libB_seq263550_[chr10:60473932-60474131]	FLI1	-3.57733	ancestral	0.0478	1
libA_seq219159_[chr10:60494144-60494343]
libB_seq152133_[chr10:60540304-60540503]	FLI1,MAZ,PRDM9,VEZF1,WT1,ZNF263,ZNF341,ZNF383,ZNF432,ZNF467,ZNF71,ZNF84,ZNF880	0.948500000000001,0.5571000000000002,-0.47660000000000124,1.327300000000001,0.9896900000000013,2.7142999999999997,1.8853000000000009,-0.009299999999999642,0.38000000000000256,1.111110000000001,0.5137,0.44040000000000035,2.907400000000001	both+both,both+both,both+both,both+both,derived,both+both,both,both,both+both,derived+derived,both,both,both	0.027000000000000003,0.0217,0.0297,0.0163,1,0.0309,0.0298,0.0414,0.00556,1,0.0234,0.0265,0.0235	0.0185,0.0188,0.0326,0.011000000000000001,0.044000000000000004,0.0159,0.021,0.0414,0.00509,0.0282,0.0181,0.0227,0.0132
libB_seq21496_[chr10:60677518-60677717]
libA_seq300463_[chr10:60678935-60679134]	ZNF235	0.01961	derived	1	0.0459
libB_seq35010_[chr10:60868341-60868540]
libA_seq126281_[chr10:62718727-62718926]
libB_seq22381_[chr10:62735760-62735959]
libA_seq34543_[chr10:62736125-62736324]
libB_seq91959_[chr10:63261108-63261307]	MAZ,RREB1,SP1,ZNF467	-0.9785999999999984,-9.45366,-2.5980000000000008,-1.0714299999999994	both,both,both,both	0.0147,0.040999999999999995,0.0338,0.0259	0.0188,0.0916,0.0591,0.0326
libB_seq273832_[chr10:64214301-64214500]	CTCF,PRDM6,ZNF182,ZNF235,ZNF287,ZNF384,ZNF487	-2.2940999999999985,-2.3980999999999995,-3.3858999999999995,-0.7745999999999995,-0.9123000000000019,-0.529399999999999,-9.41412	ancestral+both,both+both,ancestral+both,both+both,both+both,both+both,both+both	0.0187,0.0146,0.0396,0.00659,0.0011099999999999999,0.0236,0.00592	0.0595,0.032,0.105,0.00899,0.00157,0.0351,0.0191
libA_seq156633_[chr10:67752173-67752372]
libB_seq66747_[chr10:67995443-67995642]
libA_seq154015_[chr10:69538576-69538775]
libB_seq115304_[chr10:69548213-69548412]
libB_seq63355_[chr10:73839751-73839950]	KLF15,KLF6,MAZ,PATZ1,SP1,SP2,SP3,SP4,VEZF1,WT1,ZBTB17,ZNF180,ZNF263,ZNF320,ZNF341,ZNF467,ZNF529	-2.84537,-2.4693799999999992,-0.7214300000000016,-2.0281999999999982,-6.05159,-2.1239800000000013,-5.907450000000001,-4.8278300000000005,-1.6121499999999997,-5.350480000000001,-4.0275,-3.7314499999999997,0.0510199999999994,-4.206199999999999,-1.5051000000000005,-0.5408200000000001,8.79596	ancestral,ancestral,ancestral,both,both+both,ancestral,ancestral,ancestral,ancestral+ancestral,ancestral,both,both,both,both+both,both+both,both,both	0.0354,0.046,0.0268,0.0104,0.0339,0.0434,0.0218,0.0371,0.0223,0.0191,0.02,0.0365,0.0469,0.0448,0.0379,0.0245,0.0744	1,1,1,0.016,0.0742,1,1,1,1,1,0.0583,0.0652,0.0463,0.0534,0.0517,0.0277,0.0252
libA_seq72638_[chr10:73843931-73844130]	SP2,ZBTB17,ZNF281	2.595080000000001,0.2110000000000003,0.27839999999999954	derived,both,both	1,0.0427,0.0521	0.0399,0.0407,0.0497
libB_seq177357_[chr10:74895508-74895707]
libA_seq523_[chr10:75000640-75000839]
libA_seq208689_[chr10:75041756-75041955]
libB_seq212751_[chr10:75128829-75129028]
libB_seq206238_[chr10:75140924-75141123]
libB_seq92658_[chr10:75274392-75274591]
libB_seq13407_[chr10:75295592-75295791]
libA_seq224816_[chr10:75547980-75548179]
libA_seq86116_[chr10:75553106-75553305]	ZSCAN16	-1.29411	both	0.0493	0.0665
libA_seq320310_[chr10:75561949-75562148]
libA_seq103423_[chr10:75791296-75791495]	ZNF287,ZNF35	0.798239999999999,0.47359999999999935	derived+derived,both	1,0.05	0.0297,0.0456
libA_seq140481_[chr10:75793378-75793577]	ZBTB17,ZNF768	-1.266070000000001,4.5980000000000025	ancestral,both	0.0458,0.11	1,0.0398
libA_seq215246_[chr10:75793466-75793665]	ZBTB17,ZNF768	-1.266070000000001,4.5980000000000025	ancestral,both	0.0458,0.11	1,0.0398
libA_seq96220_[chr10:75794235-75794434]
libB_seq9599_[chr10:75795299-75795498]
libB_seq62711_[chr10:75797051-75797250]
libB_seq62500_[chr10:75797440-75797639]	FLI1	9.91752	both	0.0887	0.0347
libA_seq89082_[chr10:75800172-75800371]
libA_seq288708_[chr10:75801025-75801224]
libB_seq277046_[chr10:75801223-75801422]
libB_seq205965_[chr10:75802357-75802556]
libA_seq244907_[chr10:75802485-75802684]
libA_seq3609_[chr10:75802823-75803022]
libB_seq318489_[chr10:75805854-75806053]
libA_seq216446_[chr10:75806483-75806682]
libA_seq86045_[chr10:75809636-75809835]
libB_seq222700_[chr10:75821245-75821444]
libB_seq320857_[chr10:76661509-76661708]
libB_seq143404_[chr10:76794741-76794940]
libB_seq19681_[chr10:77468895-77469094]
libA_seq4061_[chr10:77490741-77490940]
libA_seq3595_[chr10:77491824-77492023]
libA_seq1133_[chr10:77810977-77811176]
libA_seq6775_[chr10:77812526-77812725]	MAZ	-0.05714	ancestral	0.0314	1
libA_seq164596_[chr10:78043734-78043933]
libA_seq102288_[chr10:78109528-78109727]
libA_seq73907_[chr10:78112546-78112745]
libA_seq6065_[chr10:78113902-78114101]
libB_seq290214_[chr10:78159478-78159677]
libA_seq251391_[chr10:78161224-78161423]	PRDM9,WT1	-1.3177699999999994,-1.2165300000000006	both,both	0.0348,0.0286	0.0452,0.0358
libB_seq184070_[chr10:78161773-78161972]
libB_seq133138_[chr10:78547212-78547411]	FOXG1,RREB1,ZBTB26,ZNF212,ZNF785,ZSCAN16	-0.9382000000000001,-9.267999999999999,-3.1531000000000002,-2.224490000000001,-9.3299,-0.1568000000000005	both+both,both,both+both,both,both+both,both+both	0.0144,0.0314,0.00822,0.0301,0.000412,0.0023	0.0583,0.0583,0.0256,0.0411,0.00551,0.00243
libA_seq69376_[chr10:80410568-80410767]	MAZ,PRDM9,VEZF1,ZBTB17,ZNF383,ZNF432,ZNF467,ZNF880	-1.2142700000000008,-5.990660000000001,-0.5454499999999989,-3.4954,1.7129699999999985,-8.24,-3.43515,-1.1666700000000008	ancestral,ancestral,ancestral,both,both,both+both,both+both,ancestral	0.0237,0.0177,0.0303,0.0238,0.0486,0.00424,0.0121,0.0331	1,1,1,0.0592,0.0399,0.0255,0.0246,1
libB_seq297015_[chr10:83070831-83071030]	ZNF235,ZNF487	-0.980360000000001,1.0808	ancestral,both	0.0369,0.0218	1,0.0191
libB_seq79087_[chr10:83146941-83147140]
libB_seq188632_[chr10:83561208-83561407]
libA_seq36919_[chr10:83647379-83647578]
libA_seq162468_[chr10:83822446-83822645]	PATZ1,VEZF1,ZNF235,ZNF263,ZNF287,ZNF467	-1.1338299999999997,-0.35758000000000045,-0.1764700000000019,-0.24489999999999945,0.2543799999999985,-0.5407999999999991	ancestral,ancestral,ancestral,ancestral,derived,both+both	0.0368,0.0318,0.0446,0.0444,1,0.019	1,1,1,1,0.0332,0.0214
libB_seq77820_[chr10:88428955-88429154]	VEZF1	0.3697	derived	1	0.0317
libB_seq295604_[chr10:88549384-88549583]	CTCF,PRDM6,ZNF182,ZNF225,ZNF235,ZNF287,ZNF384,ZNF487	-1.2646999999999995,-2.097100000000001,-4.228,-8.585899999999999,-1.4018999999999977,-4.122800000000002,-1.9901999999999997,-4.1010100000000005	ancestral+both,both+both,ancestral+ancestral,both,both+both,both+both,ancestral+both,both+both	0.0187,0.0152,0.0396,0.00456,0.00247,0.0012900000000000001,0.0236,0.0217	0.0429,0.0305,1,0.0399,0.00466,0.00503,0.086,0.0403
libB_seq239603_[chr10:88606848-88607047]
libB_seq316956_[chr10:88667188-88667387]
libA_seq42463_[chr10:88677481-88677680]	FLI1,IRF3,KLF15,MAZ,PATZ1,VEZF1,WT1,ZNF235,ZNF263,ZNF287,ZNF341,ZNF432,ZNF467,ZNF880	-1.2474000000000007,-2.4603,-2.5361199999999986,-2.107099999999999,-0.07746999999999993,-4.3576,-0.7010300000000012,3.15686,-2.7142999999999997,2.5175199999999993,-1.2377000000000002,-2.8100000000000023,-2.1837,-1.3887999999999998	both,both+both,both+both,both+both,ancestral,both+both,ancestral,derived,both+both,both+both,both+both,both+both,both+both,both+both	0.0441,0.0279,0.0293,0.017,0.0474,0.00603,0.046,1,0.00944,0.0252,0.0263,0.0044,0.00773,0.0174	0.0578,0.0405,0.0493,0.0288,1,0.0226,1,0.0201,0.0194,0.0135,0.0338,0.00882,0.0129,0.023
libB_seq11903_[chr10:89625026-89625225]
libA_seq45847_[chr10:89633427-89633626]
libA_seq236086_[chr10:89642302-89642501]
libB_seq276846_[chr10:89649781-89649980]	ZNF212	4.77552	both	0.0802	0.0456
libA_seq184674_[chr10:89674185-89674384]
libA_seq202386_[chr10:89674369-89674568]	PRDM9	3.1683	both	0.0374	0.0195
libB_seq288810_[chr10:89701516-89701715]
libA_seq56423_[chr10:89703959-89704158]	MAZ,PRDM9,ZNF341,ZNF432,ZNF467,ZNF774	-0.7857099999999999,0.25239999999999974,1.9589999999999996,-0.7699999999999996,-0.333330000000001,-1.1637000000000004	ancestral,both+both,derived,ancestral,ancestral,both	0.0264,0.0166,1,0.0401,0.0329,0.0237	1,0.0155,0.0364,1,1,0.0351
libB_seq237823_[chr10:89710976-89711175]
libA_seq133198_[chr10:89736006-89736205]
libA_seq319807_[chr10:90500383-90500582]
libA_seq17177_[chr10:92022593-92022792]
libA_seq224533_[chr10:92534212-92534411]
libA_seq132531_[chr10:93114943-93115142]
libB_seq115441_[chr10:93402242-93402441]	MAZ,PATZ1,PRDM9,ZBTB17,ZNF341,ZNF383,ZNF467,ZNF880	-2.5071399999999997,-1.5352300000000003,-0.9532699999999998,-1.6697699999999998,-2.614799999999999,-7.5092,-2.592600000000001,-1.537040000000002	both,ancestral,both+both,ancestral,ancestral,both,both+both,ancestral	0.0146,0.0335,0.0424,0.0417,0.0317,0.0155,0.0107,0.0307	0.0274,1,0.0509,1,1,0.0366,0.0189,1
libB_seq108179_[chr10:94042031-94042230]	ZNF487	7.74747	both	0.087	0.0424
libB_seq32957_[chr10:95763264-95763463]
libB_seq122644_[chr10:97632335-97632534]
libA_seq181018_[chr10:98792410-98792609]	PRDM9,ZNF320	-3.4953600000000007,-7.577310000000001	ancestral,both+both	0.0307,0.0496	1,0.12
libB_seq50712_[chr10:98995421-98995620]	ZNF780A	-8.8763	ancestral	0.0348	1
libA_seq40990_[chr10:99378170-99378369]	FLI1,PATZ1,ZNF341,ZNF383,ZNF774,ZNF880	-5.443299,-3.27463,-3.7704699999999995,-5.018560000000001,-2.8727,-1.1204	both+both,ancestral,both+both,both,both,both	0.0461,0.022000000000000002,0.0227,0.0259,0.0284,0.0167	0.0764,1,0.0501,0.0462,0.0584,0.021
libA_seq128801_[chr10:99381702-99381901]
libB_seq128888_[chr10:99798651-99798850]
libB_seq44561_[chr10:99813028-99813227]
libA_seq37129_[chr10:99859949-99860148]
libB_seq117958_[chr10:99860171-99860370]	ZNF549	-9.2474	both	0.0419	0.375
libA_seq95082_[chr10:99860503-99860702]
libA_seq235907_[chr10:99861522-99861721]
libA_seq74113_[chr10:99861695-99861894]
libB_seq153450_[chr10:99863835-99864034]	KLF6,MAZ,PATZ1,PRDM9,SP1,VEZF1,WT1,ZNF180,ZNF212,ZNF263,ZNF341,ZNF432,ZNF467,ZNF880	0.8061000000000007,0.7714999999999996,0.1056000000000008,0.8505000000000003,2.3505199999999995,1.9091000000000005,0.8144400000000012,3.7314999999999987,5.51016,0.18369999999999997,-2.29509,1.4400000000000004,1.6735000000000007,-2.7314000000000007	both,both+both,both,both,both,both+both,derived+derived,both,both+both,both+both,both+both,derived,both+both,both	0.0396,0.00349,0.0292,0.022000000000000002,0.0607,0.0224,1,0.0156,0.0518,0.0273,0.0304,1,0.00418,0.0137	0.0318,0.00295,0.0284,0.018000000000000002,0.0458,0.0131,0.0453,0.0084,0.0229,0.0259,0.0496,0.0364,0.00279,0.0235
libA_seq49531_[chr10:99867521-99867720]	FLI1,ZBTB17,ZNF132	-3.8659,1.6789000000000005,6.289299999999999	both,ancestral+both,both	0.0336,0.0265,0.0602	0.0741,0.0162,0.021
libA_seq22894_[chr10:99867619-99867818]
libB_seq18833_[chr10:99868675-99868874]
libB_seq160228_[chr10:99868713-99868912]
libB_seq113176_[chr10:99869342-99869541]	MAZ,WT1	-0.8714300000000001,-1.3711400000000005	ancestral,ancestral	0.0257,0.0414	1,1
libA_seq199716_[chr10:99869663-99869862]
libA_seq289001_[chr10:99907281-99907480]
libB_seq302704_[chr10:99913730-99913929]
libB_seq270112_[chr10:99953220-99953419]
libB_seq321180_[chr10:99968180-99968379]
libA_seq73526_[chr10:99972890-99973089]
libA_seq137716_[chr10:99986787-99986986]
libB_seq58540_[chr10:99987043-99987242]
libB_seq71532_[chr10:99991124-99991323]
libB_seq116513_[chr10:99993220-99993419]
libA_seq37026_[chr10:99997333-99997532]
libA_seq50379_[chr10:100008687-100008886]	KLF15,KLF6,MAZ,PATZ1,VEZF1,WT1,ZNF432,ZNF467	2.8969199999999997,1.693900000000001,1.7071400000000008,1.6831300000000002,0.7940000000000005,2.020620000000001,0.40999999999999925,3.0463000000000005	both,both,both,derived,both,derived,both,both+both	0.0485,0.0617,0.0309,1,0.0219,1,0.0403,0.0185	0.0271,0.0419,0.0204,0.0327,0.0174,0.0365,0.0382,0.00957
libA_seq39029_[chr10:100057613-100057812]
libA_seq891_[chr10:100152726-100152925]
libA_seq196912_[chr10:100152867-100153066]	VEZF1,ZNF436,ZNF770	1.0424999999999986,3.3607899999999997,3.2244600000000014	both,both,both	0.0193,0.0619,0.0748	0.0143,0.0257,0.0446
libB_seq1877_[chr10:100224556-100224755]
libA_seq273158_[chr10:100413232-100413431]
libA_seq46325_[chr10:100500947-100501146]
libB_seq298190_[chr10:102091397-102091596]	KLF6,MAZ,PATZ1,PRDM9,SP2,ZNF341,ZNF770	2.5918799999999997,1.2571700000000003,1.936630000000001,1.0653999999999986,1.4297600000000017,2.6721000000000004,4.887799999999999	derived,derived,derived+derived,both,derived,derived,both	1,1,1,0.0113,1,1,0.0139	0.0451,0.0234,0.0309,0.008490000000000001,0.049,0.0312,0.00182
libA_seq432_[chr10:102633709-102633908]	HKR1,MAZ,PATZ1,PRDM9,SP2,SP3,VEZF1,WT1,ZBTB17,ZIM2,ZNF263,ZNF320,ZNF341,ZNF383,ZNF432,ZNF467,ZNF529,ZNF71,ZNF770,ZNF880	5.747680000000001,-0.9642999999999997,0.2887000000000004,-1.2337000000000007,-1.4462800000000016,-2.19445,-1.8484499999999997,-2.2474500000000006,-0.1651000000000007,-2.9380999999999986,-3.3979899999999983,-4.2887,-1.6228999999999996,-3.9351399999999988,-0.3100000000000005,2.949019999999999,-4.163260000000001,-0.9908000000000019,-3.040840000000001,-2.4907000000000004	derived,both+both,ancestral+derived,both+both,ancestral,ancestral,ancestral+ancestral,ancestral+both,both,both,ancestral+ancestral,both,ancestral+ancestral,both,both+both,ancestral+derived,both,both,ancestral,both+both	1,0.0121,0.0316,0.0219,0.0488,0.0462,0.021,0.0309,0.0427,0.0189,0.0414,0.0472,0.0388,0.0299,0.00743,0.0324,0.0211,0.040999999999999995,0.0484,0.015	0.0382,0.0156,0.0295,0.0287,1,1,1,0.046,0.0447,0.0212,1,0.0762,1,0.0466,0.00796,0.0165,0.0366,0.0464,1,0.0247
libA_seq196112_[chr10:102651394-102651593]
libB_seq181203_[chr10:102663669-102663868]	PRDM6,ZNF235,ZNF287,ZNF487	-1.6214000000000013,-1.2156999999999982,-3.7894999999999985,-8.82828	both,both+both,both+both,both	0.0101,0.00231,0.00224,0.0408	0.0195,0.004,0.00758,0.0938
libB_seq194202_[chr10:102669025-102669224]	ZNF287	1.59649	both	0.0317	0.0225
libB_seq53351_[chr10:102669283-102669482]
libB_seq295014_[chr10:102670091-102670290]
libA_seq181891_[chr10:102676335-102676534]
libA_seq277593_[chr10:102683312-102683511]
libB_seq303827_[chr10:102684648-102684847]
libB_seq226339_[chr10:102694043-102694242]
libA_seq321286_[chr10:102724416-102724615]
libA_seq124099_[chr10:102725148-102725347]
libA_seq48891_[chr10:102792159-102792358]	KLF3,KLF6,SP2,SP3,ZNF596,ZNF785	1.3505000000000003,0.8061000000000007,2.0744000000000007,1.4444999999999997,-0.2522999999999982,6.835040000000001	both,both,both,both,both,both	0.0537,0.0593,0.0262,0.028999999999999998,0.0327,0.0264	0.0427,0.049,0.0164,0.0224,0.0374,0.00618
libA_seq33764_[chr10:102792236-102792435]	KLF3,KLF6,SP2,SP3,ZNF596,ZNF785	1.3505000000000003,0.8061000000000007,2.0744000000000007,1.4444999999999997,-0.2522999999999982,6.835040000000001	both,both,both,both,both,both	0.0537,0.0593,0.0262,0.028999999999999998,0.0327,0.0264	0.0427,0.049,0.0164,0.0224,0.0374,0.00618
libB_seq49547_[chr10:102792245-102792444]	KLF3,KLF6,SP2,SP3,ZNF596,ZNF785	1.3505000000000003,0.8061000000000007,2.0744000000000007,1.4444999999999997,-0.2522999999999982,6.835040000000001	both,both,both,both,both,both	0.0537,0.0593,0.0262,0.028999999999999998,0.0327,0.0264	0.0427,0.049,0.0164,0.0224,0.0374,0.00618
libB_seq44274_[chr10:102883819-102884018]
libB_seq1371_[chr10:102891304-102891503]	KLF15,PATZ1,SP1,SP2,SP3,ZNF180,ZNF467	1.49484,-0.7675999999999998,-0.08246999999999893,-3.5619999999999976,-2.3055000000000003,-1.9444500000000007,0.05102000000000029	both,both,both,both+both,both,both,derived	0.0542,0.0246,0.0426,0.00825,0.0186,0.0494,1	0.0406,0.0301,0.0432,0.0206,0.0298,0.0646,0.0372
libB_seq166291_[chr10:102936284-102936483]	ZNF263,ZNF432,ZNF467,ZNF880	-3.0714299999999994,0.5199999999999996,0.8055500000000002,1.0462999999999996	ancestral,derived,derived,derived	0.0237,1,1,1	1,0.0416,0.0301,0.034
libB_seq191601_[chr10:103009823-103010022]
libA_seq67580_[chr10:103498835-103499034]	SP2,ZNF792	0.9173999999999989,9.91752	both,both	0.0366,0.098	0.0307,0.0495
libB_seq13140_[chr10:103521715-103521914]
libA_seq118245_[chr10:103527116-103527315]	ZNF432,ZNF467	-0.6400000000000006,1.1020400000000006	both,both	0.0284,0.0372	0.0316,0.0295
libA_seq251134_[chr10:104142515-104142714]
libB_seq231566_[chr10:105042466-105042665]
libA_seq46024_[chr10:105256859-105257058]
libA_seq151378_[chr10:105502615-105502814]	EGR2,PATZ1,SP2,SP3,WT1,ZBTB17,ZNF132,ZNF281,ZNF341,ZNF398,ZNF444,ZNF467,ZNF880	0.5682999999999989,0.35916000000000103,1.2561999999999998,0.4167000000000005,1.5670000000000002,1.1008999999999993,4.495900000000001,0.9587000000000003,2.114699999999999,1.2576999999999998,-0.5670100000000016,5.092799999999999,1.8611000000000004	both,derived,both+both,both,both+both,both,both,both,both,both,both+both,both+both,both+both	0.0396,1,0.0461,0.0244,0.0217,0.0309,0.075,0.0146,0.0489,0.0517,0.0437,0.0452,0.0278	0.0345,0.0442,0.0376,0.0225,0.0161,0.0225,0.0377,0.0146,0.0313,0.0352,0.0446,0.0307,0.0188
libB_seq180700_[chr10:105806029-105806228]
libA_seq36621_[chr10:105927020-105927219]
libA_seq241043_[chr10:106053946-106054145]
libB_seq140041_[chr10:106054439-106054638]
libA_seq4844_[chr10:106113401-106113600]	SP1,ZNF529	1.6391399999999994,-2.5714200000000007	both,both	0.0451,0.0412	0.0346,0.0574
libA_seq303123_[chr10:106267924-106268123]	KLF1,KLF11,KLF15,MAZ,PATZ1,SP1,ZNF467,ZNF880	-7.35055,-8.38148,-6.1752699999999985,-2.871460000000001,-3.2817000000000007,-6.804119999999999,-1.0925900000000004,-1.4815199999999997	ancestral,both,ancestral,both,both,ancestral+ancestral,ancestral,both	0.0458,0.0478,0.018000000000000002,0.0148,0.0177,0.0361,0.0283,0.0222	1,0.0987,1,0.0305,0.0382,1,1,0.0304
libA_seq4883_[chr10:106268997-106269196]
libB_seq234762_[chr10:106423507-106423706]	ZNF235	-1.4216	both	0.0221	0.0328
libB_seq261515_[chr10:106432446-106432645]	ZNF235	-0.9216	both+both	0.0236	0.0305
libB_seq258101_[chr10:106432851-106433050]
libB_seq40992_[chr10:106435410-106435609]
libB_seq83493_[chr10:106436008-106436207]
libA_seq157832_[chr10:106439931-106440130]
libA_seq314988_[chr10:106496029-106496228]
libB_seq183363_[chr10:106496357-106496556]	IRF3,ZNF225,ZNF235	-3.42066,-2.302999999999999,-0.10790000000000077	ancestral,both,both+both	0.0427,0.0471,0.0272	1,0.0473,0.0279
libA_seq51367_[chr10:106513798-106513997]
libB_seq290446_[chr10:106744642-106744841]
libA_seq227732_[chr10:106778759-106778958]
libB_seq4451_[chr10:107734501-107734700]
libA_seq179464_[chr10:107911183-107911382]	CTCF,ZNF182,ZNF235,ZNF287,ZNF35,ZNF384	-5.17643,-3.0526,1.3431999999999977,-1.4474,-2.1578999999999997,-2.0098000000000003	ancestral,ancestral+both,both+both,both+both,both,both	0.0187,0.0396,0.00743,0.008790000000000001,0.0452,0.0236	1,0.0997,0.00421,0.0135,0.071,0.086
libA_seq235297_[chr10:108317595-108317794]
libB_seq28286_[chr10:108319652-108319851]
libA_seq231054_[chr10:108321425-108321624]
libA_seq166748_[chr10:108323174-108323373]
libA_seq69175_[chr10:108325330-108325529]
libB_seq141255_[chr10:108385032-108385231]	ZNF235	3.78429	both+both	0.0423	0.0145
libA_seq303904_[chr10:108385083-108385282]	ZNF235	3.78429	both+both	0.0423	0.0145
libB_seq71028_[chr10:108385283-108385482]
libA_seq88384_[chr10:108387889-108388088]
libB_seq112157_[chr10:108387892-108388091]
libB_seq134180_[chr10:108511014-108511213]	ZNF212,ZNF432,ZNF880	-3.020410000000001,-2.16,-1.4814800000000004	both+both,both,ancestral	0.0346,0.0231,0.031	0.0528,0.032,1
libA_seq209344_[chr10:108511426-108511625]
libB_seq152435_[chr10:108511950-108512149]	ZNF263,ZNF432,ZNF436	0.21428000000000047,-0.1900000000000004,-3.783499999999999	both,ancestral,both	0.0377,0.0437,0.0399	0.0358,1,0.0821
libA_seq217852_[chr10:108513055-108513254]	IRF3,KLF15,MAZ,VEZF1,WT1,ZBTB17,ZNF263,ZNF341,ZNF467,ZNF823	-0.7142999999999979,1.3917599999999988,1.2285000000000004,2.6485200000000013,2.2887000000000004,1.7248,2.2142,1.2540999999999993,1.620370000000002,-2.9907000000000004	both,derived,both+both,both+both,both,ancestral+derived,both+both,derived,derived+derived,both	0.0467,1,0.0115,0.0328,0.0291,0.0453,0.0494,1,1,0.0143	0.0527,0.0472,0.008159999999999999,0.0156,0.0184,0.0286,0.0292,0.0426,0.0254,0.0467
libB_seq218024_[chr10:108513592-108513791]	ZNF235,ZNF287	1.2352999999999987,2.8684600000000007	both+both,both+derived	0.00701,0.0259	0.00417,0.0126
libA_seq30041_[chr10:108513648-108513847]	ZNF235,ZNF287	1.2352999999999987,2.8684600000000007	both+both,both+derived	0.00701,0.0259	0.00417,0.0126
libB_seq90337_[chr10:108514015-108514214]
libB_seq48780_[chr10:108514663-108514862]
libA_seq34462_[chr10:108515014-108515213]
libA_seq5465_[chr10:108515042-108515241]
libA_seq109539_[chr10:108517664-108517863]
libA_seq228875_[chr10:108518348-108518547]	ZNF287	-1.35965	ancestral	0.0265	1
libB_seq45176_[chr10:108518946-108519145]
libB_seq168085_[chr10:108519539-108519738]
libB_seq236373_[chr10:108520476-108520675]	KLF15,PATZ1,ZNF263,ZNF467,ZNF529	-1.7422699999999987,-0.035210000000001074,-3.443320000000001,2.1224,4.27551	ancestral,ancestral,ancestral+ancestral,derived+derived,both	0.0441,0.0479,0.046,1,0.0783	1,1,1,0.0237,0.0496
libB_seq56862_[chr10:108522668-108522867]
libB_seq264384_[chr10:108522880-108523079]
libA_seq75631_[chr10:108523705-108523904]
libB_seq204118_[chr10:108525630-108525829]
libA_seq30219_[chr10:108526883-108527082]
libA_seq1238_[chr10:108527790-108527989]
libA_seq10283_[chr10:108527805-108528004]
libB_seq1240_[chr10:108527895-108528094]
libA_seq2189_[chr10:108527907-108528106]
libA_seq173487_[chr10:108549416-108549615]
libA_seq299585_[chr10:108699754-108699953]
libB_seq268568_[chr10:108906796-108906995]
libB_seq74149_[chr10:108908204-108908403]
libA_seq79915_[chr10:109470614-109470813]
libA_seq53960_[chr10:109470935-109471134]
libB_seq61535_[chr10:109525064-109525263]
libB_seq137122_[chr10:109955351-109955550]
libB_seq240893_[chr10:111215263-111215462]	CTCF,ZNF182,ZNF235,ZNF384	-5.17643,-3.2455999999999996,-3.2450600000000005,0.0	ancestral+ancestral,ancestral+ancestral,ancestral,both+both	0.0187,0.0396,0.0195,0.0236	1,1,1,0.0236
libB_seq87_[chr10:112660161-112660360]	ZNF235	1.88237	both	0.0394	0.0235
libA_seq3838_[chr10:112660180-112660379]	ZNF235	1.88237	both	0.0394	0.0235
libA_seq186038_[chr10:112663071-112663270]	EGR2,KLF6,PATZ1,SP1,SP2,SP4,VEZF1,ZNF180	-1.6402999999999999,-0.8061000000000007,-1.3169000000000004,-2.597900000000001,-1.8925,-2.295,-1.1333399999999987,-3.7314299999999996	both,both,both+both,both,both,both,both,both	0.0282,0.0165,0.0186,0.0255,0.0327,0.0413,0.0237,0.0364	0.0411,0.0218,0.0251,0.048,0.0456,0.0629,0.0327,0.065
libA_seq306_[chr10:112676368-112676567]
libA_seq64298_[chr10:112683325-112683524]
libB_seq247279_[chr10:112744467-112744666]
libA_seq200210_[chr10:112747429-112747628]
libA_seq243291_[chr10:112765897-112766096]
libA_seq321492_[chr10:112772800-112772999]
libB_seq148448_[chr10:112782261-112782460]	PRDM9,RXRA,SOX2,SOX4,VEZF1,ZNF320,ZNF432	5.37387,3.721399999999999,5.320000000000002,4.6545999999999985,0.4181899999999992,-0.8865999999999996,0.33000000000000007	both,both,derived,both,derived,both,derived	0.0586,0.0789,1,0.32299999999999995,1,0.0469,1	0.0203,0.0317,0.0189,0.0317,0.0313,0.0485,0.0428
libA_seq12648_[chr10:112796091-112796290]
libB_seq202842_[chr10:112797753-112797952]
libA_seq265113_[chr10:112812217-112812416]	KLF15,MAZ,PATZ1,VEZF1,WT1,ZBTB17,ZNF180,ZNF212,ZNF235,ZNF263,ZNF341,ZNF432,ZNF467,ZNF774,ZNF823,ZNF880	1.2989800000000002,2.185699999999999,1.8310000000000013,1.7757000000000005,1.5257999999999985,1.2109699999999997,3.95369,5.102070000000001,-0.9019600000000008,5.773219999999999,1.6494,5.140000000000001,1.9259000000000004,2.0182,-0.0926000000000009,1.3055999999999983	both+both,both+both,ancestral+derived,both+both,both,derived,both,both,ancestral,derived+derived,both+both,both+both,both+both,both,both,both+both	0.0429,0.0225,0.0398,0.00893,0.0181,1,0.0623,0.0718,0.0376,1,0.0641,0.0146,0.0119,0.0432,0.0432,0.00717	0.0332,0.0126,0.0257,0.0050100000000000006,0.0134,0.0467,0.0334,0.037000000000000005,1,0.0314,0.0462,0.004229999999999999,0.007559999999999999,0.0245,0.0443,0.00539
libA_seq274423_[chr10:112834211-112834410]	ZNF774	-2.691	ancestral	0.0469	1
libA_seq46085_[chr10:112838927-112839126]
libA_seq16142_[chr10:112841992-112842191]	VEZF1,ZNF263,ZNF304,ZNF341,ZNF432,ZNF880	-1.7332999999999998,-3.5000300000000006,-1.0560999999999972,-0.43441999999999936,-2.370000000000001,-1.2129999999999992	both,ancestral+ancestral,both,ancestral,both+both,both+both	0.0188,0.0213,0.0182,0.05,0.00157,0.0106	0.0309,1,0.0237,1,0.00288,0.0137
libB_seq68506_[chr10:114086678-114086877]	CTCF,IRF3,PRDM6,ZNF182,ZNF235,ZNF263,ZNF287,ZNF384,ZNF432,ZNF467	-1.0686,2.4603,-0.15529999999999866,-4.5877,-3.460749999999999,1.275500000000001,0.02632000000000012,-2.1584000000000003,2.63,1.7244900000000003	both+both,both,both+both,both,both,both+both,both,ancestral+ancestral,derived,derived+derived	0.0187,0.0744,0.0159,0.0396,0.0144,0.0189,0.0351,0.0452,1,1	0.0376,0.0461,0.0166,0.106,0.039,0.0133,0.0349,1,0.0302,0.0261
libA_seq71036_[chr10:114330236-114330435]
libA_seq971_[chr10:114552943-114553142]
libB_seq226977_[chr10:114980809-114981008]
libB_seq46429_[chr10:114996936-114997135]
libA_seq27753_[chr10:115350575-115350774]	PATZ1,VEZF1,ZNF263,ZNF467,ZNF774	-1.8732299999999995,-0.018189999999998818,-2.2165300000000006,-0.16667000000000165,2.2363999999999997	ancestral,ancestral,both,ancestral,both	0.0312,0.0347,0.040999999999999995,0.034,0.0372	1,1,0.0619,1,0.0208
libB_seq177666_[chr10:115362346-115362545]
libB_seq35758_[chr10:115363186-115363385]	ZNF770	3.67343	both	0.0708	0.0386
libB_seq135694_[chr10:115366425-115366624]
libB_seq150564_[chr10:115479559-115479758]
libA_seq22253_[chr10:115481121-115481320]	ZNF770	-3.64284	ancestral	0.0448	1
libA_seq157243_[chr10:115482075-115482274]
libA_seq277993_[chr10:115483112-115483311]	MAZ,ZNF432,ZNF467	0.4715000000000007,5.51,1.175930000000001	both+both,derived,both+both	0.015,1,0.0312	0.0132,0.0188,0.0245
libB_seq177416_[chr10:117594251-117594450]
libA_seq99789_[chr10:117851951-117852150]	PRDM9,SP3,ZNF444	-6.906560000000002,-1.75,3.4536099999999994	ancestral,both,both+both	0.0142,0.0333,0.0552	1,0.0501,0.0403
libB_seq209434_[chr10:118050239-118050438]	KLF15,KLF6,MAZ,PATZ1,PRDM9,SP1,SP2,VEZF1,WT1,ZNF180,ZNF263,ZNF341,ZNF383,ZNF432,ZNF467,ZNF529,ZNF770,ZNF880	-2.010300000000001,1.1938000000000013,-0.9285999999999994,1.7745999999999995,1.1588999999999992,6.876319999999999,4.504100000000001,0.5273000000000003,1.2165,-0.6943999999999999,4.5361199999999995,0.5901999999999994,3.6296000000000017,5.94,0.5925699999999985,-6.928570000000001,1.6326,-0.7314999999999987	both,both,both+both,both,both,both,both+both,both+both,derived,both+both,derived+derived,derived,both+both,both,both+both,both,both,both+both	0.0165,0.0454,0.0109,0.0305,0.0059299999999999995,0.0694,0.0378,0.0189,1,0.0239,1,1,0.0402,0.0432,0.0213,0.0381,0.0455,0.0183	0.0249,0.0329,0.0141,0.0199,0.00402,0.027999999999999997,0.0146,0.0161,0.0424,0.027000000000000003,0.0379,0.0486,0.0268,0.0164,0.0189,0.0868,0.034,0.0213
libA_seq175802_[chr10:118051985-118052184]
libB_seq9872_[chr10:118053492-118053691]	ZNF235	-1.07846	ancestral	0.036	1
libA_seq92645_[chr10:118642862-118643061]
libB_seq254124_[chr10:118656577-118656776]
libA_seq165379_[chr10:118668661-118668860]	ZNF433	1.1031	both	0.0768	0.0184
libB_seq319900_[chr10:118676990-118677189]
libA_seq75692_[chr10:118707031-118707230]
libA_seq47294_[chr10:118707382-118707581]
libA_seq150409_[chr10:118727036-118727235]
libB_seq139695_[chr10:118739439-118739638]
libB_seq198042_[chr10:118770714-118770913]
libA_seq277037_[chr10:118770961-118771160]
libA_seq288988_[chr10:118771111-118771310]
libB_seq286095_[chr10:118771920-118772119]	ZNF384	2.1584	both+both	0.0452	0.0452
libA_seq144814_[chr10:119732241-119732440]
libB_seq14820_[chr10:119766896-119767095]
libB_seq120929_[chr10:120258166-120258365]
libB_seq56024_[chr10:120258221-120258420]
libA_seq107851_[chr10:120261937-120262136]
libA_seq235414_[chr10:123253341-123253540]	ZNF212,ZNF383	4.224489999999999,4.75004	both+both,both	0.0159,0.0705	0.00703,0.0409
libA_seq64900_[chr10:123255125-123255324]	ZNF263	3.84532	derived	1	0.0429
libA_seq285467_[chr10:123256184-123256383]
libA_seq129762_[chr10:123257296-123257495]
libB_seq217468_[chr10:123259475-123259674]
libA_seq24814_[chr10:123894243-123894442]
libB_seq76382_[chr10:124529225-124529424]
libA_seq140143_[chr10:124764563-124764762]	CTCF,ZNF235,ZNF287,ZNF384	-5.17643,-4.2255,-2.2017000000000007,-2.0098000000000003	ancestral,both+both,both+both,both	0.0187,0.0034100000000000003,0.00678,0.0291	1,0.0163,0.0128,0.098
libB_seq24326_[chr10:125384421-125384620]	CTCF,ZNF182,ZNF225,ZNF235,ZNF384	-5.17643,-3.2455999999999996,-2.9292,-2.460799999999999,-0.24510000000000076	ancestral,ancestral,both,both+both,both+both	0.0187,0.0396,0.044000000000000004,0.0137,0.0236	1,1,0.0473,0.0285,0.0291
libA_seq63792_[chr10:125424685-125424884]
libB_seq315466_[chr10:126294300-126294499]	FLI1,HKR1,KLF15,MAZ,PATZ1,PRDM9,SP1,SP2,VEZF1,WT1,ZNF180,ZNF263,ZNF304,ZNF341,ZNF383,ZNF432,ZNF454,ZNF467,ZNF529,ZNF596,ZNF770,ZNF774,ZNF780A,ZNF880,ZNF93	2.6186000000000007,-0.5607000000000006,2.103089999999998,2.507100000000001,4.2113,0.40190000000000126,1.711339999999999,0.08259999999999934,3.6606000000000005,4.2783000000000015,1.9166700000000017,5.16323,1.5981000000000005,7.834999999999999,2.7592399999999984,6.640000000000001,-5.0824,5.7347,1.9898000000000007,8.785099999999998,3.2448999999999995,6.209099999999998,0.8040999999999983,2.7592999999…	both+both,both,both+both,both+both,both+both,both+both,both+both,both+both,both+both,both+both,derived,both+both,both,derived+derived,both+both,both+both,both,both+both,both+both,both,both+both,both,both,both+derived,both	0.0499,0.0294,0.0573,0.00866,0.017,0.00607,0.0533,0.0286,0.0104,0.0198,1,0.0379,0.0601,1,0.0507,0.0124,0.0341,0.00905,0.0501,0.13,0.0462,0.0443,0.0494,0.0227,0.0456	0.0281,0.0335,0.038,0.0042899999999999995,0.00639,0.0051600000000000005,0.0434,0.0282,0.00318,0.008320000000000001,0.05,0.0108,0.0473,0.0159,0.0366,0.00224,0.078,0.00215,0.0374,0.027000000000000003,0.0238,0.00701,0.0394,0.0131,0.0344
libB_seq131037_[chr10:126297162-126297361]	KLF11,KLF15,KLF3,KLF6,MAZ,PATZ1,PRDM9,SP1,SP2,SP3,VEZF1,WT1,ZNF180,ZNF212,ZNF263,ZNF320,ZNF341,ZNF383,ZNF444,ZNF467,ZNF529,ZNF770	5.18558,-3.7937699999999994,0.24739999999999895,-3.5817000000000014,-2.4785000000000004,-0.816930000000001,-4.542,-3.8041,-3.6114999999999995,-1.1111000000000004,-0.278789999999999,-1.0824800000000003,-8.63887,-4.77552,-3.2040599999999984,-8.700980000000001,-1.8524999999999991,1.3424999999999994,0.18554999999999922,-4.4388,-7.918359999999999,-5.173400000000001	both,ancestral,both,both+both,both+both,ancestral,ancestral+both,both,both+both,both+both,ancestral,ancestral,both+both,both,both,ancestral,ancestral,both,both+both,ancestral+ancestral,both+both,both	0.068,0.0288,0.0347,0.0087,0.00823,0.0397,0.0135,0.023,0.00707,0.0311,0.0325,0.0435,0.012,0.0254,0.0195,0.0472,0.037000000000000005,0.0353,0.0409,0.0138,0.0257,0.00936	0.0425,1,0.0324,0.0255,0.0163,1,0.0357,0.0414,0.017,0.0406,1,1,0.053,0.0508,0.0403,1,1,0.0294,0.04,1,0.0681,0.0381
libA_seq301917_[chr10:127675882-127676081]	CTCF,IRF3,PRDM6,ZNF182,ZNF225,ZNF235,ZNF287,ZNF35,ZNF384,ZNF492	0.617700000000001,-3.88096,-1.669900000000002,1.403500000000001,-9.414190000000001,-1.8432000000000013,-1.9122999999999983,-4.306999999999999,-2.1584000000000003,-5.3368	ancestral+both,ancestral,both+both,both+both,both,both+both,both+both,both,ancestral+ancestral,both	0.0187,0.0397,0.0069900000000000006,0.0396,0.044000000000000004,0.0143,0.000643,0.019,0.0452,0.0389	0.0187,1,0.0133,0.0396,0.0855,0.0249,0.00135,0.05,1,0.0906
libA_seq241086_[chr10:127846687-127846886]
libA_seq173008_[chr10:128144832-128145031]
libA_seq64123_[chr10:128233320-128233519]
libB_seq87362_[chr10:128269416-128269615]
libB_seq227156_[chr10:128491659-128491858]
libA_seq54115_[chr10:130069660-130069859]	KLF15,PRDM9,SP1,ZNF467,ZNF580	-1.4432999999999998,-7.54206,-5.0412,-2.8980000000000006,1.8264999999999993	ancestral,ancestral,both,ancestral,both	0.0468,0.0125,0.026000000000000002,0.0198,0.0305	1,1,0.0814,1,0.026000000000000002
libA_seq4739_[chr10:130844140-130844339]	PRDM9	-3.1215	both	0.0177	0.0344
libA_seq103316_[chr10:132131681-132131880]
libB_seq83228_[chr10:132595844-132596043]
libA_seq287325_[chr10:134187440-134187639]	EGR1,EGR2,MAZ,VEZF1,ZBTB17,ZNF263,ZNF432,ZNF880	1.657399999999999,0.45319999999999894,0.5785,-0.14540000000000042,1.2384999999999984,-0.06121999999999872,0.9100000000000001,-1.907399999999999	both,both,both,both,both,ancestral,both,both	0.051,0.0366,0.0218,0.0111,0.0132,0.0465,0.0427,0.00556	0.0332,0.0334,0.0188,0.0118,0.00998,1,0.0375,0.0085
libA_seq229297_[chr10:134822945-134823144]	EGR2,HKR1,KLF15,KLF3,KLF6,MAZ,PATZ1,PRDM9,SP1,SP2,SP3,SP4,VEZF1,WT1,ZBTB17,ZNF180,ZNF263,ZNF281,ZNF304,ZNF341,ZNF383,ZNF432,ZNF467,ZNF563,ZNF770,ZNF880,ZNF93	3.5252,-0.5607999999999969,5.154649999999998,6.257699999999998,4.224499999999999,2.0070999999999994,3.1761,0.4017999999999997,3.2370699999999992,1.710799999999999,2.4536999999999995,3.573730000000001,3.6061000000000014,4.2783,2.7064699999999995,8.44442,1.591800000000001,4.0825000000000005,1.729000000000001,6.020599999999998,-1.2963000000000005,3.1900000000000004,3.490739999999999,0.09750000000000…	both,both,derived+derived,both,both+both,both+both,both+both,both,both+both,both+both,both+both,derived,both+both,both+both,derived,both,both+both,derived,both,both+both,both,derived,both+both,both,derived,derived,derived	0.045,0.0143,1,0.0996,0.055999999999999994,0.0149,0.0161,0.0135,0.0466,0.0131,0.0203,1,0.0142,0.0139,1,0.0483,0.0225,1,0.0492,0.0332,0.0345,1,0.0202,0.0255,1,1,1	0.0189,0.0161,0.0463,0.0291,0.0192,0.00861,0.00771,0.0124,0.0305,0.00825,0.0108,0.045,0.00454,0.00577,0.0314,0.0113,0.0153,0.0497,0.0329,0.00705,0.0365,0.0276,0.00933,0.0255,0.0432,0.0315,0.047
libA_seq107959_[chr10:134823133-134823332]	KLF11,MAZ,PATZ1,PRDM9,SP1,SP2,SP3,ZBTB17,ZNF180,ZNF304,ZNF341,ZNF519,ZNF529,ZNF548,ZNF571,ZNF770,ZNF785,ZNF93	6.3092999999999995,0.5571000000000002,2.3451000000000004,9.00939,2.7629,5.239699999999999,4.787049999999999,-2.018370000000001,3.9537200000000006,1.3271000000000015,1.4227000000000007,2.628899999999998,-1.3775499999999994,3.083400000000001,2.1667000000000005,1.040799999999999,6.752574999999999,-0.7500000000000018	both,both,both+both,both,both,both+both,both,ancestral,both+both,both,both+both,both,both,both,both,both,both,both+both	0.0729,0.0268,0.0309,0.0584,0.0262,0.0477,0.0665,0.038,0.045,0.0446,0.0462,0.0544,0.0376,0.036000000000000004,0.0604,0.0412,0.114,0.03	0.0415,0.0233,0.0177,0.007940000000000001,0.0169,0.017,0.0251,1,0.0211,0.0336,0.0344,0.0327,0.0473,0.018000000000000002,0.0438,0.0349,0.0394,0.0344
libB_seq9217_[chr11:819387-819586]	PATZ1,SP1,SP2,SP3,WT1,ZNF180,ZNF341,ZNF467	0.45069999999999943,-5.42268,-2.636329999999999,-2.6018500000000007,-1.62885,-1.277800000000001,-0.6392000000000024,-0.15306000000000086	derived,ancestral,both,ancestral,ancestral+derived,both+both,both+both,ancestral	1,0.0451,0.0325,0.043,0.0355,0.0331,0.00916,0.0366	0.0434,1,0.0511,1,0.0468,0.0421,0.0126,1
libA_seq198191_[chr11:837071-837270]	HKR1,KLF6,PATZ1,PRDM9,SP1,SP2,SP3,VEZF1,WT1,ZIM2,ZNF180,ZNF267,ZNF283,ZNF341,ZNF383,ZNF467,ZNF770	-0.5607000000000006,-1.6531000000000002,0.3661999999999992,-0.2616999999999994,-3.6082,-0.4463000000000008,-1.9166000000000007,-0.012129999999999086,-2.9586999999999986,-7.22682,-0.6202999999999985,1.2407000000000004,-2.963000000000001,-1.5983999999999998,-2.0649000000000015,0.5917999999999992,-0.7449000000000012	both,both+both,both+derived,both+both,both+both,both+both,both+both,ancestral,both+both,both,both+both,both,both,both+both,both,both,both	0.0255,0.0395,0.0335,0.0354,0.023,0.0132,0.0143,0.0347,0.0171,0.0212,0.0131,0.0373,0.0465,0.0338,0.0155,0.023,0.0414	0.0272,0.0585,0.0309,0.0371,0.0403,0.0141,0.0236,1,0.0305,0.0432,0.0134,0.0373,0.0682,0.0474,0.0155,0.0201,0.0467
libA_seq104041_[chr11:842131-842330]
libB_seq106105_[chr11:854388-854587]	KLF15,KLF6,MAZ,PATZ1,PRDM9,SP2,VEZF1,WT1,ZBTB17,ZNF263,ZNF281,ZNF444,ZNF467	-0.4330000000000016,-0.34689999999999976,-2.01427,-1.6479300000000006,-7.467300000000002,-1.5537399999999995,-0.18787999999999982,-1.670110000000001,-2.284370000000001,-1.3673300000000008,0.010300000000000864,-8.587629999999999,-0.5407999999999991	both,both,ancestral+ancestral,ancestral,both,both,ancestral,ancestral,ancestral+ancestral,ancestral,both,both+both,both	0.033,0.0442,0.0193,0.0329,0.0111,0.0461,0.0332,0.0389,0.0362,0.0349,0.0455,0.0395,0.0192	0.0359,0.0474,1,1,0.0546,0.0596,1,1,1,1,0.0455,0.0779,0.0216
libA_seq272433_[chr11:880843-881042]
libB_seq138408_[chr11:1109010-1109209]	ZNF432	-1.62	ancestral	0.0353	1
libA_seq104300_[chr11:1157377-1157576]	KLF15,SP1,SP2,SP3,SP4,ZNF341,ZNF383,ZNF548	5.82475,4.876280000000001,1.7108000000000008,2.453800000000001,5.39343,-3.4433000000000007,4.96296,0.15740000000000087	derived,both,both,both,derived,ancestral,both,both	1,0.0425,0.0387,0.0414,1,0.0388,0.078,0.0504	0.040999999999999995,0.0196,0.0288,0.0243,0.0331,1,0.0454,0.048
libB_seq102062_[chr11:1226884-1227083]
libA_seq285607_[chr11:1227090-1227289]	ZNF432	1.05	derived	1	0.0384
libA_seq237798_[chr11:1279661-1279860]
libA_seq167343_[chr11:1445965-1446164]	EGR1,EGR2,FLI1,HKR1,KLF11,KLF15,KLF3,KLF6,MAZ,PATZ1,PRDM9,SP1,SP2,SP3,SP4,VEZF1,WT1,ZBTB17,ZNF132,ZNF180,ZNF263,ZNF341,ZNF432,ZNF467,ZNF529,ZNF770,ZNF774,ZNF780A,ZNF880,ZNF93	-1.7407000000000004,-2.172699999999999,-8.50513,-4.158899999999999,0.7629000000000001,-3.1958900000000003,-0.7525999999999993,-0.8877999999999986,-2.9142999999999972,-2.929599999999999,-0.21499999999999986,-1.1442999999999994,-3.437999999999999,-1.3240999999999996,-2.6392999999999986,-1.4969999999999999,-2.773199999999999,-1.1468000000000007,-1.9917000000000016,3.0,-6.63264,-2.114700000000001,-2.…	both+both,both+both,ancestral,both,both,both+both,both,both+both,both+both,both+both,both+both,both+both,both+both,both+both,both+both,both+both,both+both,both+both,both,both+both,both+both,both+both,ancestral+ancestral,both+both,both+both,both+both,ancestral,both,both+both,both+both	0.012,0.00882,0.0115,0.0487,0.0493,0.0235,0.0435,0.0258,0.00201,0.006959999999999999,0.022000000000000002,0.0338,0.004370000000000001,0.0202,0.0203,0.0011,0.0097,0.0129,0.0256,0.0208,0.0144,0.0192,0.0307,0.0372,0.0237,0.0352,0.0256,0.0565,0.0278,0.0291	0.0217,0.0155,1,0.10800000000000001,0.0474,0.044000000000000004,0.0512,0.0329,0.0047,0.0136,0.0229,0.0451,0.0111,0.0253,0.0372,0.00158,0.0175,0.0177,0.0388,0.0124,0.0642,0.0294,1,0.0579,0.0488,0.0443,1,0.0426,0.0375,0.0444
libB_seq63906_[chr11:1868227-1868426]	KLF15,MAZ,PATZ1,VEZF1,WT1,ZNF180,ZNF263,ZNF341,ZNF383,ZNF432,ZNF467,ZNF880	3.639169999999999,1.8143100000000008,0.8450299999999995,4.921249999999999,2.8659800000000004,2.2684800000000003,6.63916,1.5410000000000004,-0.6574100000000005,5.140000000000001,3.29627,3.6388800000000003	derived,both+both,derived,derived+derived,derived,both,both+both,both,both,both,both+derived,both	1,0.026000000000000002,1,1,1,0.0556,0.0763,0.0475,0.0493,0.0297,0.0318,0.0301	0.0296,0.0165,0.0393,0.008409999999999999,0.0312,0.0397,0.0229,0.0342,0.053,0.0116,0.0163,0.0145
libA_seq251467_[chr11:2042979-2043178]
libA_seq98268_[chr11:2178688-2178887]	ZNF180	-3.7593	both	0.00966	0.017
libB_seq295088_[chr11:2228783-2228982]
libA_seq234298_[chr11:2234700-2234899]	PATZ1	-1.80983	ancestral	0.0316	1
libB_seq298101_[chr11:2251510-2251709]	ZNF287	0.16666	derived	1	0.034
libB_seq78792_[chr11:2252478-2252677]
libB_seq58875_[chr11:2420940-2421139]	MAZ,SP2,SP3,SP4,ZBTB17,ZNF281,ZNF341	-1.5356699999999996,-2.024799999999999,-1.5,-2.2212999999999994,-1.4404000000000003,-1.4846000000000004,-1.6186000000000007	ancestral,both+both,both,both,both,both,both	0.0219,0.0295,0.0412,0.0492,0.0178,0.0422,0.0452	1,0.0419,0.0553,0.0741,0.0274,0.0538,0.0624
libB_seq18319_[chr11:2421330-2421529]	PPARD,SP2,ZNF121,ZNF263	-0.5410000000000004,-1.5619999999999994,-0.3426000000000009,-0.8366999999999987	both,both,both,both	0.0266,0.0308,0.0419,0.0474	0.0309,0.0405,0.0448,0.0549
libB_seq28760_[chr11:2422555-2422754]
libA_seq25489_[chr11:2422818-2423017]
libB_seq151177_[chr11:2422944-2423143]	ZNF770	1.81637	both	0.0636	0.0472
libA_seq28038_[chr11:2423184-2423383]	KLF15,ZNF341,ZNF467	-1.3092800000000002,-0.5082000000000004,-0.36733999999999956	ancestral,ancestral,ancestral	0.0481,0.0493,0.0348	1,1,1
libA_seq136605_[chr11:2423268-2423467]	KLF15,VEZF1,ZNF341,ZNF467	-1.3092800000000002,-1.0424499999999988,-0.5082000000000004,-0.36733999999999956	ancestral,ancestral,ancestral,ancestral	0.0481,0.0265,0.0493,0.0348	1,1,1,1
libA_seq107098_[chr11:2423377-2423576]
libA_seq172305_[chr11:2444812-2445011]	PATZ1,ZNF341	-1.7746999999999993,-1.5983	both,both+both	0.0224,0.0256	0.0345,0.0354
libA_seq156523_[chr11:2571394-2571593]	PRDM9,ZNF281,ZNF444	-1.0373900000000011,-4.845400000000001,-8.73191	ancestral,ancestral,both+both	0.0489,0.0434,0.0251	1,1,0.055999999999999994
libB_seq161444_[chr11:2571439-2571638]	PRDM9,ZNF281,ZNF444	-1.0373900000000011,-4.845400000000001,-8.73191	ancestral,ancestral,both+both	0.0489,0.0434,0.0251	1,1,0.055999999999999994
libA_seq253464_[chr11:2739201-2739400]
libB_seq166243_[chr11:3925929-3926128]
libA_seq114043_[chr11:4092212-4092411]	PRDM9	-7.07476	ancestral	0.0138	1
libB_seq319685_[chr11:4656237-4656436]
libA_seq237712_[chr11:4929613-4929812]	PRDM6,ZNF235,ZNF287,ZNF384	-2.3980999999999995,-0.4117999999999995,-0.9123000000000001,2.1584000000000003	both+both,both+both,both+both,both+both	0.0309,0.0164,0.00806,0.0452	0.0606,0.0185,0.0103,0.0452
libB_seq98708_[chr11:5320074-5320273]	ZSCAN16	4.36275	derived	1	0.0466
libA_seq62442_[chr11:5719781-5719980]
libA_seq212094_[chr11:6239127-6239326]	EGR2,KLF10,KLF15,KLF6,MAZ,PATZ1,PRDM9,SP1,SP2,SP3,SP4,VEZF1,WT1,ZBTB17,ZNF180,ZNF263,ZNF281,ZNF383,ZNF432,ZNF444,ZNF467,ZNF529,ZNF770,ZNF774,ZNF880,ZNF93	4.287799999999999,8.30926,3.618500000000001,1.5101999999999993,3.4715000000000007,1.2113000000000014,8.8038,7.762889999999999,9.195850000000002,4.166600000000001,4.040899999999999,5.0303499999999985,4.896930000000001,1.7064000000000021,-0.7963000000000005,3.316300000000002,3.3607999999999993,2.675930000000001,0.04999999999999982,7.40206,3.62242,6.163259999999999,-8.278400000000001,0.3000000000000…	both,derived,both+derived,both,both+both,both+both,both+both,derived+derived,derived+derived,both+both,both,derived+derived,both+derived,both+both,both,both+both,both+both,both,derived,both+both,both+derived,both+derived,both+both,both,derived+derived,both	0.0734,1,0.0898,0.0239,0.0096,0.0049299999999999995,0.0323,1,1,0.0471,0.0303,1,0.0379,0.0207,0.0131,0.0181,0.0759,0.0561,1,0.0711,0.0362,0.0693,0.0293,0.0318,1,0.0344	0.0284,0.0339,0.0412,0.0153,0.00359,0.0032700000000000003,0.00328,0.0408,0.0362,0.0199,0.0107,0.00809,0.0148,0.0126,0.0141,0.0072299999999999994,0.049,0.0402,0.0446,0.0385,0.0159,0.0339,0.185,0.0284,0.013999999999999999,0.0444
libA_seq116126_[chr11:6417482-6417681]
libA_seq6449_[chr11:6417585-6417784]	KLF15,PATZ1,SP2,SP4,VEZF1,ZNF263,ZNF467	2.37117,1.4648000000000003,1.4545499999999993,0.6556999999999995,0.9878499999999999,1.3571999999999989,1.1020199999999996	derived,both+both,both,both,derived,both,both+both	1,0.0393,0.0622,0.045,1,0.0575,0.0307	0.0394,0.0281,0.0487,0.0408,0.0269,0.0443,0.024
libB_seq310656_[chr11:6555319-6555518]	EGR2,SP1,VEZF1,ZBTB17,ZNF281,ZNF880	-2.388489999999999,-2.3299000000000003,-1.9090999999999987,-1.9358000000000004,-3.0102600000000006,1.120370000000002	ancestral,both,both,both,both,derived	0.0465,0.0326,0.0119,0.0284,0.0398,1	1,0.0552,0.0207,0.0471,0.0628,0.0335
libB_seq1167_[chr11:6654670-6654869]
libA_seq117830_[chr11:6672556-6672755]	MAZ,PATZ1,WT1,ZNF180,ZNF467,ZNF770,ZNF774	1.5929000000000002,3.0775000000000006,0.7113400000000016,1.953710000000001,1.555550000000001,1.7142999999999997,3.4726999999999997	both,both,derived+derived,derived,derived+derived,both,both	0.0225,0.04,1,1,1,0.0421,0.0738	0.0149,0.0193,0.046,0.0499,0.0256,0.031,0.0351
libA_seq54098_[chr11:7006070-7006269]
libA_seq164874_[chr11:7156992-7157191]	FLI1,KLF6,ZBTB17,ZNF235,ZNF263,ZNF467,ZNF880	-3.6598300000000012,-1.6021,-2.7522699999999993,-2.0784599999999998,-0.7040799999999994,-0.6203700000000012,-1.4907399999999997	ancestral,both,ancestral,ancestral,ancestral,ancestral,both	0.0475,0.0474,0.0312,0.0275,0.0402,0.0311,0.0309	1,0.0692,1,1,1,1,0.042
libA_seq97761_[chr11:7157061-7157260]	FLI1,KLF6,ZBTB17,ZNF235,ZNF263,ZNF467,ZNF880	-3.6598300000000012,-1.6021,-2.7522699999999993,-2.0784599999999998,-0.7040799999999994,-0.6203700000000012,-1.4907399999999997	ancestral,both,ancestral,ancestral,ancestral,ancestral,both	0.0475,0.0474,0.0312,0.0275,0.0402,0.0311,0.0309	1,0.0692,1,1,1,1,0.042
libB_seq203710_[chr11:7157077-7157276]	FLI1,ZBTB17,ZNF235,ZNF263,ZNF467,ZNF880	-3.6598300000000012,-2.7522699999999993,-2.0784599999999998,-0.7040799999999994,-0.6203700000000012,-1.4907399999999997	ancestral,ancestral,ancestral,ancestral,ancestral,both	0.0475,0.0312,0.0275,0.0402,0.0311,0.0309	1,1,1,1,1,0.042
libA_seq122000_[chr11:7157267-7157466]
libB_seq71271_[chr11:7159175-7159374]
libA_seq281860_[chr11:7284415-7284614]
libA_seq181930_[chr11:7285971-7286170]	ZNF212,ZNF432	5.102039999999999,2.6500000000000004	both,derived	0.0778,1	0.0419,0.0301
libA_seq296900_[chr11:7288192-7288391]
libA_seq108023_[chr11:7290688-7290887]	ZNF235	1.05886	derived	1	0.0362
libB_seq7687_[chr11:7291544-7291743]
libA_seq2239_[chr11:7313324-7313523]	ZNF235	-0.47059	ancestral	0.0417	1
libB_seq2538_[chr11:7313350-7313549]	ZNF235	-0.47059	ancestral	0.0417	1
libB_seq316388_[chr11:7375254-7375453]
libB_seq17580_[chr11:7598015-7598214]
libA_seq54845_[chr11:7649617-7649816]
libA_seq107293_[chr11:7661160-7661359]	MAZ,PATZ1,SP2,SP3,ZNF180,ZNF263,ZNF467	2.4928299999999997,2.0352300000000003,1.9338999999999995,1.4444,2.1481499999999993,0.02041000000000004,2.2245100000000004	both,derived,both,both,derived,derived,both+both	0.0278,1,0.0479,0.0534,1,1,0.0276	0.0149,0.03,0.0346,0.0404,0.0483,0.0469,0.0163
libA_seq40141_[chr11:8256467-8256666]
libA_seq30494_[chr11:8739858-8740057]	KLF11,MAZ,SP1,SP2,SP3,SP4,ZNF180,ZNF263,ZNF341	1.0722100000000019,0.8785699999999999,3.0618599999999994,1.8512500000000003,3.0555000000000003,3.7377000000000002,2.0185200000000005,2.2165,4.515500000000001	both,derived,both+both,both+both,both,both,derived,both,derived+derived	0.0551,1,0.06,0.0496,0.0559,0.0746,1,0.0586,1	0.0493,0.0257,0.0412,0.0362,0.0295,0.0373,0.0496,0.0386,0.0319
libA_seq134448_[chr11:8751478-8751677]	EGR2,KLF15,KLF3,KLF6,MAZ,PATZ1,PRDM9,SP1,SP2,SP3,SP4,VEZF1,WT1,ZBTB17,ZNF180,ZNF263,ZNF341,ZNF432,ZNF444,ZNF467,ZNF484,ZNF529,ZNF548,ZNF770,ZNF774,ZNF880	-1.9207999999999998,-3.5566999999999993,-5.268099999999999,-1.2143000000000015,-1.5928000000000004,-1.3169000000000004,-9.0094,-4.474230000000001,-1.5868000000000002,-3.1111000000000004,-1.3361,-0.5394000000000005,5.845299999999998,1.2385000000000002,-6.41671,-1.8763000000000023,-1.5051999999999985,-1.5,-8.804120000000001,-1.6204,-2.4259000000000004,-1.4898000000000025,-1.6388999999999996,-1.0408…	both+both,both+both,both,both+both,both+both,both+both,both+both,both+both,both+both,both,both,both+both,both+both,both+both,ancestral+ancestral,both+both,both+both,both+both,ancestral+ancestral,both+both,both,both+both,both,both+both,both+both,both+both	0.0398,0.00698,0.0357,0.0153,0.00405,0.00564,0.000734,0.0295,0.0224,0.0254,0.0323,0.00262,0.0204,0.0325,0.0219,0.0109,0.00535,0.0184,0.0439,0.0013800000000000002,0.0354,0.0151,0.018000000000000002,0.0026100000000000003,0.0245,0.00895	0.06,0.016,0.099,0.0226,0.00646,0.00796,0.013999999999999999,0.053,0.0305,0.0511,0.0408,0.00322,0.00639,0.0227,1,0.0195,0.00859,0.0238,1,0.00216,0.0568,0.0172,0.0272,0.0045899999999999995,0.0366,0.016
libB_seq30015_[chr11:9697383-9697582]
libA_seq205879_[chr11:9752376-9752575]	EGR2,KLF15,KLF6,MAZ,PATZ1,PRDM9,SP2,SP3,SP4,VEZF1,WT1,ZBTB17,ZNF132,ZNF180,ZNF263,ZNF281,ZNF304,ZNF341,ZNF432,ZNF444,ZNF467,ZNF529,ZNF770,ZNF774,ZNF823,ZNF880	2.0862999999999996,-0.8247000000000018,0.46940000000000026,-1.2999999999999972,4.4437000000000015,-4.710299999999998,1.1157000000000004,-0.8240999999999996,-0.5082000000000004,-2.2180999999999997,-1.0823999999999998,-0.19270000000000032,-4.47106,0.018499999999999517,-3.479599999999998,-1.1753,0.16829999999999856,-3.163899999999998,-1.58,-2.5979399999999986,-3.4285999999999994,7.8367,0.96940000000…	both,both+both,both+both,both+both,both+both,both+both,both+both,both,both+derived,both+both,both+both,both+derived,both,both+both,both+both,both,both,both+both,both+both,both+both,both+both,both+both,both+both,both+both,both,ancestral+both	0.0706,0.0111,0.0454,0.00314,0.016,0.00472,0.0301,0.0458,0.042,0.0016699999999999998,0.0214,0.0335,0.0495,0.0187,0.0028,0.0395,0.0463,0.00527,0.00542,0.0385,0.00312,0.0179,0.007890000000000001,0.0222,0.027000000000000003,0.0101	0.0454,0.013999999999999999,0.0405,0.00451,0.00541,0.0179,0.0247,0.0543,0.0454,0.0035399999999999997,0.0269,0.0357,0.102,0.0186,0.006679999999999999,0.0479,0.0444,0.0113,0.00784,0.0467,0.007379999999999999,0.0034700000000000004,0.00618,0.00742,0.0635,0.0178
libB_seq124113_[chr11:10313595-10313794]
libA_seq283898_[chr11:10518836-10519035]
libB_seq298898_[chr11:11132351-11132550]
libB_seq64687_[chr11:11148992-11149191]	ZNF182,ZNF235,ZNF287,ZNF384,ZNF487	-3.0526,-3.8236000000000008,-0.07900000000000063,-0.9705999999999992,-2.484845	ancestral,both+both,both+both,both,both	0.0454,0.0058200000000000005,0.008329999999999999,0.0291,0.0397	1,0.021,0.00842,0.0491,0.0502
libB_seq164648_[chr11:11424970-11425169]
libB_seq294968_[chr11:11767138-11767337]	IRF3,PRDM6,ZNF235,ZNF287,ZNF384,ZNF487	-3.087299999999999,-1.6797000000000004,-4.097999999999999,-2.8507999999999996,-2.1584000000000003,-2.48484	both,both+both,both+both,both+both,ancestral+ancestral,both	0.0368,0.0123,0.000796,0.000388,0.0452,0.0372	0.0654,0.0229,0.00509,0.00133,1,0.0479
libA_seq316450_[chr11:12492169-12492368]	EGR2,HKR1,KLF15,KLF6,MAZ,PATZ1,PRDM9,SP2,SP3,SP4,VEZF1,WT1,ZNF132,ZNF263,ZNF341,ZNF432,ZNF467,ZNF770,ZNF880	-0.9855999999999998,1.9907000000000004,1.4741999999999997,2.6225000000000005,0.47139999999999915,1.394400000000001,1.308399999999999,1.6362999999999985,1.0185000000000013,0.8689,-1.2788000000000004,1.7629000000000001,1.2975999999999992,1.3607999999999993,4.459,-0.07999999999999918,2.1938000000000013,-1.3878000000000004,-1.3333999999999993	both,both,both,both,both+both,both+both,both,both+both,both+both,both,both+both,both,both,both+both,derived+derived,both,both+both,both,both+both	0.0357,0.0606,0.0251,0.0773,0.00823,0.0235,0.0386,0.0369,0.0408,0.0457,0.00457,0.0345,0.0256,0.06,1,0.0295,0.009179999999999999,0.0487,0.011000000000000001	0.0443,0.0398,0.0182,0.0427,0.0072299999999999994,0.0172,0.0306,0.0272,0.032,0.0399,0.0071,0.0245,0.0215,0.046,0.022000000000000002,0.0299,0.00519,0.0617,0.0145
libA_seq15357_[chr11:12621780-12621979]
libB_seq163938_[chr11:12622573-12622772]	ZNF341	-2.0722	both+both	0.0426	0.0641
libB_seq22761_[chr11:12622629-12622828]	ZNF341	-2.0722	both+both	0.0426	0.0641
libA_seq155378_[chr11:12622753-12622952]
libB_seq5550_[chr11:12663726-12663925]
libB_seq70330_[chr11:12664650-12664849]	KLF15,KLF6,MAZ,PRDM9,SP1,SP3,VEZF1,WT1,ZNF467,ZNF529,ZNF765	0.12370000000000125,0.8468999999999998,1.2929000000000013,1.0093000000000014,2.1340000000000003,1.3332999999999995,1.0424499999999988,1.7113800000000001,0.7244899999999994,1.479560000000001,3.148199999999999	both,both,both,both,both,both,derived,both,both+both,both,both	0.0359,0.0338,0.0147,0.0185,0.0652,0.0327,1,0.0401,0.0288,0.0366,0.0833	0.035,0.0271,0.0102,0.0147,0.0423,0.0251,0.0265,0.0294,0.0243,0.0313,0.0364
libB_seq263345_[chr11:12937949-12938148]
libB_seq220306_[chr11:12937971-12938170]
libB_seq201297_[chr11:13042632-13042831]
libA_seq43418_[chr11:14155994-14156193]
libA_seq154333_[chr11:14157115-14157314]
libB_seq53624_[chr11:14157525-14157724]	ZNF467	0.32653	derived	1	0.0351
libA_seq56531_[chr11:14163284-14163483]
libB_seq30658_[chr11:14164713-14164912]
libB_seq79248_[chr11:14214775-14214974]
libB_seq124711_[chr11:14266323-14266522]	SP1	2.8969	both	0.0569	0.04
libA_seq47989_[chr11:14280496-14280695]
libB_seq201576_[chr11:14290959-14291158]	ZNF770	-2.2347	both	0.0155	0.029
libA_seq283907_[chr11:14303491-14303690]	ZNF436	-4.4846	both	0.000796	0.00338
libB_seq136905_[chr11:14310075-14310274]
libB_seq8418_[chr11:14322370-14322569]
libA_seq61756_[chr11:14343071-14343270]
libB_seq226689_[chr11:14345633-14345832]
libB_seq220842_[chr11:14367016-14367215]	FLI1,PRDM6,ZNF235,ZNF287,ZNF492	0.7731999999999992,-1.9611800000000006,-0.686300000000001,-2.3245500000000003,4.7143	both,ancestral,both+both,both+both,both	0.0475,0.0479,0.0308,0.0104,0.0863	0.0391,1,0.0372,0.0194,0.0389
libA_seq169675_[chr11:14369671-14369870]
libA_seq210418_[chr11:14374634-14374833]
libB_seq53024_[chr11:14401591-14401790]	ZNF287	0.3421	both	0.0163	0.0149
libA_seq72266_[chr11:14606513-14606712]
libA_seq290063_[chr11:14609781-14609980]
libA_seq96163_[chr11:15181704-15181903]
libA_seq181533_[chr11:15181849-15182048]
libA_seq157113_[chr11:15689817-15690016]
libB_seq260947_[chr11:15791193-15791392]	ZNF212	-0.26531	both	0.0399	0.0413
libB_seq193353_[chr11:15844094-15844293]
libB_seq83322_[chr11:16942699-16942898]
libB_seq33185_[chr11:16945632-16945831]	EGR2,ZNF212	-2.000020000000001,-5.112289999999999	both,both	0.0493,0.0312	0.0751,0.0621
libB_seq5020_[chr11:16947211-16947410]
libA_seq74438_[chr11:16952381-16952580]	ZNF467	-5.99998	ancestral	0.042	1
libB_seq98813_[chr11:16966839-16967038]
libB_seq272618_[chr11:17753360-17753559]	MAZ,PATZ1,PRDM9,SP1,VEZF1,WT1,ZNF212,ZNF263,ZNF432,ZNF467,ZNF880	-3.057170000000001,-1.1831300000000002,-1.6075,-3.9381600000000017,-1.26065,-0.27834999999999965,-9.673480000000001,-0.8775499999999994,-1.75,-0.09183000000000074,-2.1110799999999994	ancestral+ancestral,ancestral,both+both,ancestral,ancestral,ancestral,both,ancestral,both+both,ancestral,both+both	0.0148,0.0364,0.0144,0.0406,0.0248,0.0498,0.0186,0.0387,0.0072299999999999994,0.037000000000000005,0.0187	1,1,0.0213,1,1,1,0.0719,1,0.0107,1,0.028999999999999998
libA_seq36864_[chr11:18135194-18135393]
libB_seq120179_[chr11:19224571-19224770]
libB_seq180513_[chr11:19425387-19425586]
libA_seq65751_[chr11:19472423-19472622]	PRDM9	-7.55136	ancestral	0.0125	1
libA_seq103508_[chr11:19472424-19472623]	PRDM9	-7.55136	ancestral	0.0125	1
libA_seq92444_[chr11:19480235-19480434]	PRDM9,SP2,VEZF1,ZNF180,ZNF320,ZNF529	3.570079999999999,1.8925899999999984,1.557549999999999,3.6574100000000005,1.2885999999999989,-2.3877500000000005	both+derived,both,derived,derived,both+both,both	0.048,0.0617,1,1,0.0496,0.0499	0.0232,0.0449,0.0226,0.0375,0.0378,0.0632
libA_seq31859_[chr11:19873348-19873547]	MAZ,PATZ1,PRDM9,VEZF1,WT1,ZNF263,ZNF432,ZNF467,ZNF770,ZNF880	-2.8714000000000013,-3.281600000000001,-1.7289700000000003,-2.545399999999999,-2.752600000000001,-0.97959,7.73,-4.816319999999999,-2.4489400000000003,-2.527800000000001	both+both,both,both,both+both,both,ancestral,both,both+both,both,both+both	0.009170000000000001,0.0168,0.0383,0.0021,0.0139,0.0381,0.0296,0.0113,0.0462,0.00648	0.0197,0.0363,0.0536,0.005370000000000001,0.0233,1,0.00646,0.0343,0.0683,0.0115
libA_seq132906_[chr11:20005366-20005565]	PRDM6,ZNF235,ZNF287	-1.4271999999999991,-0.6372600000000013,-6.89471	both,ancestral,both+both	0.0203,0.0401,0.00243	0.0323,1,0.0186
libA_seq165979_[chr11:20019766-20019965]	MAZ,VEZF1,ZNF263,ZNF432,ZNF880	-0.085700000000001,-1.7332999999999998,-2.449,-0.9499999999999993,0.08330000000000126	both,both+both,both,both+both,both+both	0.017,0.0107,0.0132,0.0041,0.013999999999999999	0.0173,0.018000000000000002,0.0249,0.0053,0.0137
libB_seq78660_[chr11:21812141-21812340]	CTCF,PRDM6,ZNF182,ZNF235,ZNF287,ZNF384,ZNF487	-4.568630000000001,-2.8348999999999993,-2.5526999999999997,0.20589999999999975,0.42109999999999914,-2.7058999999999997,-1.5756999999999977	ancestral,ancestral+both,both,both+both,both+both,ancestral+ancestral,both+both	0.0291,0.0081,0.0396,0.0121,0.00491,0.0236,0.0043	1,0.0227,0.0535,0.0112,0.00428,1,0.00624
libA_seq150418_[chr11:21938682-21938881]
libA_seq315422_[chr11:21959331-21959530]	CTCF,ZNF182,ZNF235,ZNF384	-5.17643,-4.228,-0.5686300000000006,-1.745099999999999	ancestral,ancestral,ancestral+ancestral,both	0.0187,0.0396,0.0407,0.0291	1,1,1,0.086
libA_seq278538_[chr11:22332929-22333128]
libB_seq194326_[chr11:22730668-22730867]	CTCF,PRDM6,ZNF182,ZNF235,ZNF287,ZNF384,ZNF432,ZNF487	-5.17643,-0.6504999999999992,0.0,-3.1079000000000008,-5.324500000000002,-1.7451000000000008,1.71,-9.41413	ancestral,ancestral+both,ancestral+both,both+both,both+both,both,both,both	0.0187,0.0419,0.0396,0.012,0.0016600000000000002,0.0236,0.0388,0.00854	1,0.0498,0.0396,0.0304,0.00892,0.0722,0.0299,0.0266
libA_seq246505_[chr11:23259485-23259684]	PRDM9,VEZF1,ZNF287,ZNF432,ZNF467,ZNF71,ZNF880	-5.121499999999999,-2.1151,1.1754399999999992,-2.8,-1.3877499999999996,3.367000000000001,-2.9537000000000013	both+both,both,derived,ancestral,ancestral,both,both+both	0.008579999999999999,0.0061,1,0.0294,0.0283,0.053,0.0152	0.0294,0.0121,0.0274,1,1,0.040999999999999995,0.0278
libB_seq180394_[chr11:23504294-23504493]
libA_seq312876_[chr11:23861190-23861389]	ZNF880	0.43519	both	0.0403	0.0371
libB_seq169428_[chr11:24035918-24036117]	EGR2,MAZ,PRDM9,VEZF1,WT1,ZBTB17,ZNF180,ZNF263,ZNF398,ZNF432,ZNF467,ZNF484,ZNF880	-1.942499999999999,-1.1285699999999999,-3.0747600000000004,-0.9878499999999999,-1.1958800000000007,-1.1834699999999998,-0.5,9.39175,7.14428,-2.33,-1.0648,-0.45369999999999955,-0.6388899999999991	both,ancestral+ancestral,ancestral,ancestral+ancestral,ancestral,ancestral,both,both+both,derived,both+both,both+both,both,both	0.0231,0.0243,0.0333,0.0269,0.0427,0.0469,0.0124,0.07200000000000001,1,0.007370000000000001,0.0177,0.0486,0.0372	0.0366,1,1,1,1,1,0.0131,0.0101,0.0396,0.0124,0.022000000000000002,0.0515,0.042
libB_seq304615_[chr11:24075535-24075734]	ZSCAN16	-1.29414	both+both	0.0158	0.0231
libA_seq309165_[chr11:24504389-24504588]
libA_seq287992_[chr11:24506470-24506669]
libB_seq86547_[chr11:25599423-25599622]
libA_seq219458_[chr11:26555404-26555603]	ZBTB17,ZNF132,ZNF432	2.3486700000000003,3.818200000000001,2.58	derived,both,derived	1,0.0848,1	0.0355,0.0454,0.0303
libB_seq319122_[chr11:26817440-26817639]
libB_seq115575_[chr11:27262591-27262790]
libA_seq55721_[chr11:27991903-27992102]	ZNF212	-1.03061	both+both	0.0301	0.035
libA_seq272337_[chr11:28040808-28041007]
libB_seq233215_[chr11:28105497-28105696]
libB_seq321227_[chr11:28119196-28119395]	ZNF235,ZNF287	0.2647100000000009,0.9561399999999987	derived,derived	1,1	0.0436,0.0287
libA_seq90136_[chr11:28119684-28119883]
libB_seq99950_[chr11:28128741-28128940]
libB_seq302315_[chr11:28157601-28157800]
libA_seq219305_[chr11:28184028-28184227]
libA_seq274259_[chr11:28185453-28185652]
libA_seq227456_[chr11:28207446-28207645]
libA_seq311974_[chr11:28261317-28261516]
libB_seq113880_[chr11:28261892-28262091]
libB_seq70023_[chr11:28267457-28267656]
libA_seq282028_[chr11:28274302-28274501]	ZNF880	0.60185	derived	1	0.0375
libB_seq253923_[chr11:28277956-28278155]
libB_seq184726_[chr11:28355555-28355754]	ZNF235,ZSCAN16	1.2058,2.5686	both+both,both+both	0.024,0.00732	0.0169,0.0030800000000000003
libB_seq299008_[chr11:28367381-28367580]
libB_seq47053_[chr11:28368520-28368719]
libA_seq269362_[chr11:28369647-28369846]
libB_seq63643_[chr11:28371611-28371810]
libA_seq124803_[chr11:28371889-28372088]
libB_seq119970_[chr11:28377880-28378079]
libA_seq152587_[chr11:28378191-28378390]
libA_seq76903_[chr11:28379548-28379747]
libA_seq127730_[chr11:28383272-28383471]
libB_seq44471_[chr11:28383282-28383481]
libB_seq27373_[chr11:28603304-28603503]
libA_seq300175_[chr11:29945346-29945545]
libA_seq52500_[chr11:29945922-29946121]	ZNF331	-9.4433	both	0.0188	0.165
libB_seq88405_[chr11:29949397-29949596]	ZNF341,ZNF484	0.4426199999999998,1.9444	derived,both	1,0.066	0.05,0.0498
libB_seq23318_[chr11:29949987-29950186]
libB_seq165459_[chr11:29952284-29952483]
libA_seq201060_[chr11:29956978-29957177]
libA_seq181588_[chr11:29957139-29957338]
libA_seq9119_[chr11:29960661-29960860]
libA_seq104479_[chr11:29966353-29966552]
libB_seq85547_[chr11:29967702-29967901]
libA_seq158854_[chr11:29968317-29968516]
libB_seq205058_[chr11:29971826-29972025]
libA_seq61927_[chr11:29980538-29980737]
libA_seq17290_[chr11:29982685-29982884]
libB_seq24715_[chr11:29987161-29987360]	ZNF287	-2.51754	both	0.0185	0.0325
libA_seq308302_[chr11:29993945-29994144]	SP2,SP4,VEZF1	2.371880000000001,3.2868999999999993,3.6969499999999993	derived,both,derived	1,0.0724,1	0.0417,0.0396,0.0123
libB_seq191553_[chr11:30142649-30142848]
libA_seq35167_[chr11:30772061-30772260]	ZNF311	-5.3918	both	0.00771	0.0263
libB_seq292181_[chr11:31631502-31631701]	ZNF287	0.10526	both	0.0269	0.0263
libB_seq45609_[chr11:32278031-32278230]	PRDM6,PRDM9,VEZF1,ZNF432,ZNF880	-1.8349799999999998,-0.47659999999999947,1.2242499999999996,-0.6400000000000006,0.06481000000000137	ancestral,both,derived,both,derived	0.0495,0.0143,1,0.0188,1	1,0.0159,0.025,0.021,0.0415
libA_seq255348_[chr11:33504547-33504746]	EGR2,FLI1,HKR1,IRF3,KLF15,KLF6,MAZ,PATZ1,PRDM9,SP1,SP2,SP3,SP4,VEZF1,WT1,ZBTB17,ZNF212,ZNF235,ZNF263,ZNF281,ZNF287,ZNF341,ZNF383,ZNF398,ZNF432,ZNF467,ZNF529,ZNF71,ZNF770,ZNF774,ZNF823,ZNF880	1.4748000000000019,-5.092788,2.3178,1.3332999999999995,2.5051000000000005,2.37758,1.9215000000000018,1.753499999999999,2.8038000000000007,1.3504999999999985,2.6363000000000003,1.4444999999999997,1.5245999999999995,1.4120999999999988,3.5979000000000028,1.6880000000000006,3.357146,-0.441180000000001,5.082500000000001,2.072099999999999,-0.8070199999999996,1.2049999999999983,1.9259000000000004,9.1339…	both+both,both+both,both,both+both,both+both,derived+derived,both+both,both+both,both+both,both,both,both,both+both,both+both,both+both,both+both,both+both,ancestral,both+both,both,ancestral+ancestral,both+both,both+both,derived,both+both,both+both,both+both,both+both,both+both,both+both,both+both,both+both	0.0162,0.0292,0.0402,0.0485,0.0443,1,0.00329,0.00788,0.0116,0.0392,0.0356,0.0582,0.0163,0.000713,0.00998,0.0144,0.0103,0.0421,0.0991,0.0494,0.0297,0.012,0.0399,1,0.00159,0.00281,0.0197,0.0534,0.00943,0.0221,0.0482,0.00569	0.013000000000000001,0.0521,0.028999999999999998,0.0372,0.0218,0.0474,0.0019399999999999999,0.0049299999999999995,0.00473,0.0269,0.0211,0.0444,0.0107,0.000462,0.00492,0.00979,0.00507,1,0.0418,0.035,1,0.00867,0.0348,0.0196,0.000588,0.00149,0.0151,0.0439,0.007809999999999999,0.00701,0.0209,0.0022
libA_seq10918_[chr11:33563744-33563943]	EGR2,KLF15,KLF3,KLF6,MAZ,PATZ1,PRDM9,SP1,SP2,SP3,SP4,VEZF1,WT1,ZBTB17,ZNF180,ZNF212,ZNF263,ZNF281,ZNF341,ZNF383,ZNF432,ZNF467,ZNF529,ZNF770,ZNF774,ZNF880	-2.0144,-5.35055,-1.5154999999999994,-1.6020000000000003,-4.528599999999997,-3.232400000000002,-3.168199999999999,-3.701060000000002,-1.91737,-0.9907000000000004,-1.3934000000000015,-1.0424000000000007,-0.5051999999999985,0.7430999999999983,-2.2592999999999996,4.683710000000001,-7.391699999999998,-1.5360999999999994,-1.5052000000000003,-2.5741000000000014,-0.620000000000001,-4.670059999999999,-7.…	both+both,ancestral+ancestral,both,both+both,both+both,both+both,both+both,ancestral,both+both,both+both,both+both,both+both,both+both,both+both,both+both,derived,both+both,both+both,both+both,both+both,both+both,both+both,ancestral,both+both,both,both+both	0.0259,0.0443,0.0324,0.0165,0.0010199999999999999,0.0104,0.0149,0.0419,0.0353,0.0131,0.0325,0.0015300000000000001,0.0028,0.015,0.009590000000000001,1,0.0101,0.0473,0.0303,0.0215,0.00857,0.0475,0.0365,0.00969,0.0284,0.00587	0.0407,1,0.0459,0.026000000000000002,0.00323,0.0212,0.0307,1,0.0488,0.0174,0.0413,0.00197,0.0033799999999999998,0.0126,0.0131,0.0491,0.0454,0.059000000000000004,0.0393,0.0299,0.0101,0.0867,1,0.0195,0.0263,0.0101
libB_seq83369_[chr11:33872981-33873180]	ZNF770	0.8061	both	0.0381	0.0326
libB_seq13739_[chr11:34340740-34340939]	RARG	-1.4714	both	0.0442	0.13
libB_seq133010_[chr11:34346252-34346451]
libB_seq234384_[chr11:34418601-34418800]
libB_seq80631_[chr11:34623228-34623427]
libA_seq19817_[chr11:34678703-34678902]
libB_seq274599_[chr11:34860783-34860982]	ZBTB26,ZNF785,ZSCAN16	-6.908099999999999,-2.5772999999999993,-6.696100000000001	both+both,both+both,both+both	0.00367,0.0034200000000000003,0.000162	0.0474,0.0059,0.00175
libA_seq216096_[chr11:35318303-35318502]
libA_seq60452_[chr11:35863974-35864173]	IRF3,PRDM6,ZNF235,ZNF287,ZNF467,ZNF487	-0.8015999999999988,-0.6601999999999997,-0.9705999999999992,0.18420000000000059,0.03704000000000107,-8.242429999999999	both,both,both+both,both+both,both,both	0.0386,0.00564,0.008159999999999999,0.00411,0.0351,0.0335	0.0439,0.007559999999999999,0.0111,0.0039,0.0349,0.0759
libB_seq124497_[chr11:35991782-35991981]	ZBTB26	-3.59182	both	0.0359	0.0975
libA_seq234029_[chr11:36069487-36069686]	PATZ1,ZNF263,ZNF341,ZNF770,ZNF880	-0.7746300000000002,-0.4591799999999999,-5.598399999999998,-1.959200000000001,1.3332999999999995	ancestral,both,both+both,both,both	0.04,0.042,0.00892,0.0216,0.0243	1,0.0469,0.031,0.035,0.0185
libB_seq20767_[chr11:36145298-36145497]
libB_seq155934_[chr11:39390452-39390651]	ZNF132	-5.54549	ancestral	0.0466	1
libB_seq243718_[chr11:39489137-39489336]
libB_seq176672_[chr11:42083740-42083939]
libB_seq171347_[chr11:42350178-42350377]
libB_seq58307_[chr11:42512177-42512376]
libB_seq210752_[chr11:42620894-42621093]	ZNF235	-1.35296	ancestral	0.0333	1
libB_seq31265_[chr11:42881005-42881204]
libA_seq77453_[chr11:43351856-43352055]
libA_seq60306_[chr11:43363678-43363877]
libB_seq168507_[chr11:43397626-43397825]
libA_seq107815_[chr11:43413665-43413864]	ZNF287	-1.08772	both	0.0186	0.0244
libB_seq6724_[chr11:43414174-43414373]
libB_seq71356_[chr11:43453616-43453815]
libB_seq317781_[chr11:43476861-43477060]
libA_seq267066_[chr11:44689745-44689944]	PATZ1,ZNF304	-0.6408199999999997,-2.7662999999999993	ancestral+derived,both	0.0365,0.0277	0.0425,0.0528
libA_seq110521_[chr11:44964110-44964309]	PRDM9	1.0093	both	0.0213	0.0165
libA_seq51879_[chr11:45355052-45355251]
libA_seq30961_[chr11:46317593-46317792]	KLF15,KLF6,MAZ,PATZ1,SP1,SP2,VEZF1,WT1,ZBTB17,ZNF263,ZNF341,ZNF383,ZNF432,ZNF467,ZNF529,ZNF548,ZNF774,ZNF880	-5.185600000000001,-2.7856799999999993,-3.3356899999999996,-2.0352300000000003,-4.82474,-0.8346999999999998,-2.806000000000001,-3.350480000000001,-1.2935700000000008,-2.642800000000001,0.37700000000000067,-4.175879999999999,-1.1899999999999995,-3.9693400000000008,-9.642809999999999,1.4258999999999986,0.2272999999999996,-1.2777800000000008	both+both,ancestral,both+both,ancestral+ancestral,ancestral,both+both,both+both,ancestral+ancestral,ancestral,both+both,ancestral+derived,both,both+both,both+both,both,both,both+both,ancestral	0.0111,0.0432,0.0106,0.03,0.0476,0.0397,0.0111,0.0287,0.0456,0.0139,0.0373,0.0359,0.0262,0.0105,0.0201,0.0205,0.013000000000000001,0.0323	0.0337,1,0.0253,1,1,0.0457,0.0253,1,1,0.0249,0.0345,0.0581,0.0316,0.0263,0.0691,0.015,0.0118,1
libB_seq87492_[chr11:46689537-46689736]
libA_seq276356_[chr11:47777274-47777473]	PRDM6,ZNF235,ZNF287,ZNF487	0.6601999999999997,0.23530000000000229,-1.9561000000000028,-8.747500000000002	both+both,both+both,both+both,both+both	0.0289,0.000726,0.000117,0.00148	0.0231,0.000697,0.000236,0.00988
libB_seq6227_[chr11:47788763-47788962]	ZNF180,ZNF432,ZNF792	0.8611000000000004,0.48999999999999844,-8.59793	both+both,both+both,both	0.0378,0.0212,0.0333	0.0326,0.0192,0.052000000000000005
libA_seq11641_[chr11:47788885-47789084]
libA_seq289661_[chr11:47817952-47818151]	ZNF212,ZNF235,ZNF287,ZNF432,ZNF880	4.53061,2.8922000000000008,1.5526600000000013,-3.0700000000000003,-0.9814899999999991	both+both,both+both,both+both,both+both,ancestral+both	0.0428,0.0231,0.0237,0.00257,0.0322	0.0219,0.00949,0.0162,0.00606,0.0395
libA_seq235082_[chr11:47823166-47823365]
libA_seq59620_[chr11:47859332-47859531]
libB_seq314970_[chr11:47982671-47982870]	CTCF,ZNF287,ZNF384	-3.6372999999999998,-0.3771899999999988,-2.1584000000000003	both,ancestral,ancestral+ancestral	0.0291,0.0324,0.0452	0.098,1,1
libA_seq256748_[chr11:55113228-55113427]
libA_seq264483_[chr11:55699992-55700191]	ZNF287	-0.43859	ancestral	0.032	1
libB_seq4366_[chr11:57247438-57247637]	ZNF432,ZNF880	1.4800000000000004,0.5	both+both,both+both	0.0411,0.0247	0.0327,0.022000000000000002
libA_seq32723_[chr11:58953560-58953759]	ZNF432	0.35	derived	1	0.0427
libB_seq82188_[chr11:58958613-58958812]
libA_seq172863_[chr11:59485458-59485657]	EGR2,KLF15,KLF6,MAZ,PATZ1,PRDM9,SP1,VEZF1,WT1,ZBTB17,ZNF212,ZNF432,ZNF467,ZNF770	-3.8416999999999994,-2.8969000000000005,-2.540800000000001,-0.5571300000000008,-2.54223,-1.2336399999999994,-3.267999999999999,-1.87275,-2.2886100000000003,-4.55045,9.295914,0.05000000000000071,-1.898159999999999,0.8775999999999993	both,both+both,both,both+both,ancestral,both,both,ancestral,both+both,both,both+both,both+both,both,both	0.0237,0.0189,0.0208,0.0237,0.0263,0.0337,0.0313,0.0208,0.0257,0.018000000000000002,0.0426,0.0017,0.0185,0.0557	0.0556,0.0345,0.0407,0.0272,1,0.0428,0.0633,1,0.0393,0.0615,0.00951,0.0016899999999999999,0.0271,0.0489
libB_seq27362_[chr11:59583268-59583467]
libB_seq321709_[chr11:59812113-59812312]
libA_seq137601_[chr11:60161428-60161627]
libB_seq144377_[chr11:60836367-60836566]	EGR2,KLF15,KLF3,KLF5,KLF6,MAZ,PATZ1,PRDM9,SP1,SP2,SP3,SP4,VEZF1,WT1,ZNF180,ZNF263,ZNF28,ZNF341,ZNF383,ZNF432,ZNF444,ZNF467,ZNF880	1.6402999999999999,3.556700000000001,2.0721999999999987,2.226800000000001,2.3979999999999997,1.5929000000000002,0.1056000000000008,-0.9252399999999987,3.041240000000001,1.8512000000000004,1.963000000000001,0.8689,1.3514999999999997,0.8453000000000017,8.63885,2.2783999999999995,-0.7196999999999996,1.5245999999999995,5.87042,0.16999999999999993,1.618549999999999,2.6224000000000007,-2.73140000000000…	both,both+both,both,both,both,both+both,both+both,both+both,both,both+both,both+both,both,both+both,both+both,both+both,both+both,both,derived,both,both+both,both+both,both+both,both+both	0.0358,0.0246,0.0212,0.0791,0.0417,0.004070000000000001,0.0172,0.0331,0.0695,0.0465,0.0153,0.0471,0.0057399999999999994,0.00405,0.0508,0.0389,0.0214,1,0.0671,0.00945,0.0455,0.0193,0.00314	0.0243,0.0111,0.0129,0.0489,0.0221,0.00283,0.0168,0.0387,0.0472,0.0342,0.00983,0.0403,0.00361,0.0028,0.0113,0.0253,0.03,0.04,0.0356,0.00908,0.04,0.0105,0.0059700000000000005
libA_seq67288_[chr11:61354639-61354838]	SP1	1.31959	both	0.0451	0.037
libA_seq56553_[chr11:61399635-61399834]
libB_seq158815_[chr11:61651942-61652141]
libA_seq98061_[chr11:61975560-61975759]	ZNF774	-3.491	ancestral	0.0379	1
libB_seq32526_[chr11:62649051-62649250]	EGR2,HKR1,KLF15,MAZ,PATZ1,PRDM9,SP1,SP2,SP3,VEZF1,WT1,ZNF180,ZNF263,ZNF341,ZNF383,ZNF432,ZNF444,ZNF467,ZNF880	2.2445899999999988,-1.6541999999999994,-2.0412399999999993,-1.9499700000000004,-1.9718999999999998,-2.2337000000000007,-3.433020000000001,-1.5867000000000004,-4.6296,-1.4788000000000014,-2.0,-7.61112,-2.30616,-1.3688000000000002,-2.574,-0.3799999999999999,6.29901,-3.7113999999999994,-4.805589999999999	derived,both+derived,ancestral,ancestral+ancestral,both+derived,both,both+both,both+both,both+both,both+both,both+both,both+both,both+both,both,both,both,both+both,both+both,both	1,0.0255,0.0414,0.0197,0.021,0.011000000000000001,0.0412,0.0345,0.0189,0.008790000000000001,0.007240000000000001,0.0135,0.044000000000000004,0.0232,0.022000000000000002,0.0356,0.0552,0.0317,0.0126	0.0481,0.0316,1,1,0.034,0.0188,0.083,0.0447,0.0503,0.0139,0.0111,0.0549,0.0686,0.0305,0.033,0.0381,0.0333,0.043,0.033
libB_seq279611_[chr11:63291689-63291888]	VEZF1,ZNF432,ZNF467	2.2787499999999987,-2.1800000000000006,3.3704100000000006	derived,both,derived+derived	1,0.032,1	0.0184,0.0446,0.0179
libB_seq287327_[chr11:63291768-63291967]	VEZF1,ZNF432,ZNF467	2.2787499999999987,-2.1800000000000006,3.3704100000000006	derived,both,derived+derived	1,0.032,1	0.0184,0.0446,0.0179
libA_seq68345_[chr11:63297513-63297712]
libB_seq41705_[chr11:63304324-63304523]	PATZ1,SP2,ZSCAN30	0.3451000000000004,1.0908999999999995,-0.06490000000000151	both+derived,both,both	0.0277,0.0309,0.0285	0.0252,0.0248,0.0285
libB_seq222982_[chr11:63306595-63306794]	KLF15,MAZ,PATZ1,PRDM9,VEZF1,ZBTB17,ZNF263,ZNF341,ZNF398,ZNF467,ZNF823,ZNF880,ZSCAN16	-3.680369999999999,-4.092830000000001,-1.4788300000000003,0.24300000000000033,-3.6364,-3.7064699999999995,-2.6428700000000003,-0.6884999999999994,-0.7421999999999986,-3.4897699999999983,-6.0741,-8.09254,5.049060000000001	ancestral,both+both,ancestral,both,both,ancestral+ancestral,both+both,ancestral,both,both+both,ancestral,both+both,both+both	0.0295,0.0101,0.034,0.0371,0.00777,0.0238,0.0457,0.0478,0.0441,0.0126,0.0211,0.00541,0.0269	1,0.0293,1,0.0355,0.0228,1,0.0756,1,0.054000000000000006,0.0284,1,0.0298,0.00584
libB_seq185714_[chr11:63306673-63306872]	KLF15,MAZ,PATZ1,PRDM9,VEZF1,ZBTB17,ZNF263,ZNF341,ZNF398,ZNF467,ZNF823,ZNF880,ZSCAN16	-3.680369999999999,-4.092830000000001,-1.4788300000000003,0.24300000000000033,-3.6364,-3.7064699999999995,-2.6428700000000003,-0.6884999999999994,-0.7421999999999986,-3.4897699999999983,-6.0741,-8.09254,5.049060000000001	ancestral,both+both,ancestral,both,both,ancestral+ancestral,both+both,ancestral,both,both+both,ancestral,both+both,both+both	0.0295,0.0101,0.034,0.0371,0.00777,0.0238,0.0457,0.0478,0.0441,0.0126,0.0211,0.00541,0.0269	1,0.0293,1,0.0355,0.0228,1,0.0756,1,0.054000000000000006,0.0284,1,0.0298,0.00584
libB_seq215248_[chr11:63307693-63307892]
libA_seq206539_[chr11:63313255-63313454]
libB_seq168838_[chr11:63320746-63320945]
libB_seq297407_[chr11:63682216-63682415]	MAZ,PATZ1,SP2,VEZF1,ZNF180,ZNF263,ZNF320,ZNF432,ZNF626,ZNF93	-0.29285999999999923,-1.2253299999999996,-2.2396800000000017,-0.10909999999999975,-3.0370100000000004,-1.5816300000000005,-0.28859999999999886,-1.4800000000000004,3.5185999999999993,-0.021399999999999864	ancestral,ancestral,ancestral,ancestral,ancestral,ancestral,both+both,both+both,both,both+both	0.0298,0.0363,0.0426,0.0339,0.0428,0.0335,0.0216,0.024,0.0373,0.0444	1,1,1,1,1,1,0.0216,0.0303,0.0070799999999999995,0.0444
libA_seq287765_[chr11:63682219-63682418]	MAZ,PATZ1,SP2,VEZF1,ZNF180,ZNF263,ZNF320,ZNF432,ZNF626,ZNF93	-0.29285999999999923,-1.2253299999999996,-2.2396800000000017,-0.10909999999999975,-3.0370100000000004,-1.5816300000000005,-0.28859999999999886,-1.4800000000000004,3.5185999999999993,-0.021399999999999864	ancestral,ancestral,ancestral,ancestral,ancestral,ancestral,both+both,both+both,both,both+both	0.0298,0.0363,0.0426,0.0339,0.0428,0.0335,0.0216,0.024,0.0373,0.0444	1,1,1,1,1,1,0.0216,0.0303,0.0070799999999999995,0.0444
libB_seq201584_[chr11:63817031-63817230]	EGR1,EGR2,KLF11,KLF15,KLF3,KLF6,MAZ,PATZ1,PRDM9,SP1,SP2,SP3,SP4,VEZF1,WT1,ZBTB17,ZNF180,ZNF263,ZNF281,ZNF341,ZNF467,ZNF529,ZNF770,ZNF774,ZNF880,ZNF93	-1.2370999999999999,-5.633099999999999,-3.7629099999999998,-9.690719999999999,-6.1855699999999985,-4.744900000000001,-6.235699999999998,-5.6127,0.2989999999999995,-4.876200000000001,-4.561999999999999,-2.4536999999999995,-6.081999999999999,-4.290899999999999,-4.27838,-6.8165,-8.064810000000001,-2.4694000000000003,-7.56706,-3.1639,-3.4908,-3.74493,-8.3609,-5.4091000000000005,-2.8148100000000005,-1…	both,both+both,both,both+both,ancestral,both,both+both,both+both,ancestral+both,both+both,both+both,both+both,both+both,both+both,both+both,both+both,both+both,both+both,both+both,both+both,both+both,both+both,both+both,both,ancestral+ancestral,both	0.0461,0.0148,0.0415,0.0172,0.040999999999999995,0.012,0.00201,0.00078,0.0232,0.0159,0.00825,0.0148,0.0144,0.0033399999999999997,0.0158,0.00783,0.0134,0.0197,0.0208,0.0241,0.00808,0.0251,0.0293,0.006940000000000001,0.0235,0.0198	0.0582,0.053,0.0552,0.11599999999999999,1,0.0447,0.0115,0.006959999999999999,0.022000000000000002,0.0319,0.0243,0.0254,0.0593,0.0136,0.0359,0.045,0.0589,0.0349,0.0705,0.0466,0.0177,0.0401,0.188,0.0328,1,0.0233
libB_seq171215_[chr11:63817196-63817395]
libB_seq15606_[chr11:64059373-64059572]	SP2,ZBTB26	1.7272800000000004,-4.57147	derived,both	1,0.0231	0.0468,0.0894
libB_seq44720_[chr11:64060727-64060926]	MAZ,PATZ1,SP2,VEZF1,ZNF432,ZNF770,ZNF774	2.3428999999999984,0.4859999999999989,-2.024800000000001,1.448500000000001,0.41000000000000014,-0.408100000000001,-0.45449999999999946	both,both,both,both,both,both,both	0.0213,0.0155,0.0155,0.0182,0.0145,0.0431,0.016	0.0115,0.013999999999999999,0.0249,0.012,0.013000000000000001,0.046,0.02
libA_seq13351_[chr11:64096672-64096871]
libA_seq151641_[chr11:64363981-64364180]
libA_seq62589_[chr11:64416981-64417180]
libA_seq259442_[chr11:64466347-64466546]	ZSCAN30	-2.25	both	0.0497	0.0696
libA_seq185459_[chr11:64474206-64474405]
libA_seq177115_[chr11:64497917-64498116]	ZNF467,ZNF770	-0.8163200000000002,-1.7652999999999999	ancestral,both	0.0317,0.0479	1,0.0647
libA_seq14060_[chr11:64543929-64544128]
libB_seq5276_[chr11:64569135-64569334]
libB_seq80153_[chr11:64810477-64810676]	ZNF121	3.1239	both	0.13	0.0497
libB_seq4735_[chr11:64813819-64814018]	MAZ,PRDM9,VEZF1,WT1,ZNF263,ZNF304,ZNF341,ZNF383,ZNF467,ZNF529,ZNF880	1.7143000000000015,1.3178,1.3272999999999993,2.3814199999999985,2.7142600000000012,4.5327,1.8033000000000001,1.0,4.17525,2.489799999999999,1.6573700000000002	both+both,both+both,both+both,both+both,both+both,both,both,both,both+both,both,both	0.00665,0.0159,0.0309,0.0357,0.0384,0.0699,0.046,0.0485,0.0825,0.0056700000000000006,0.0368	0.00403,0.0119,0.0212,0.0221,0.0205,0.0309,0.031,0.0432,0.0484,0.0031100000000000004,0.0262
libA_seq2726_[chr11:64814866-64815065]
libA_seq25690_[chr11:64827633-64827832]	MAZ,PRDM9,VEZF1,ZNF263,ZNF383,ZNF467,ZNF770,ZNF880	-2.828570000000001,-2.0280400000000016,-1.9757499999999997,-3.5611999999999995,-2.5,-5.602070000000001,-1.5612700000000004,-0.6203700000000021	ancestral,ancestral,ancestral,both+both,both,both+both,both,ancestral	0.0156,0.0403,0.0202,0.0121,0.017,0.00909,0.0488,0.0374	1,1,1,0.03,0.0268,0.0333,0.0635,1
libB_seq95589_[chr11:64854505-64854704]
libA_seq298607_[chr11:64856009-64856208]	EGR1,EGR2,FLI1,HKR1,KLF15,KLF6,MAZ,PATZ1,PRDM9,SP1,SP2,SP3,SP4,VEZF1,WT1,ZBTB17,ZNF180,ZNF212,ZNF260,ZNF263,ZNF281,ZNF341,ZNF383,ZNF432,ZNF444,ZNF467,ZNF529,ZNF580,ZNF770,ZNF774,ZNF880	-0.06480000000000175,-0.4245000000000019,-6.05153,-2.336499999999999,-2.5463999999999984,0.36739999999999995,-4.478499999999999,-4.880299999999998,-2.794299999999998,-3.0309600000000003,-3.330630000000001,-2.4352,-2.959100000000001,-2.466700000000003,-3.6701000000000015,-2.4770000000000003,-2.453710000000001,0.08163999999999927,-1.130799999999999,-5.571400000000001,-9.16498,-3.1556999999999995,-2…	both,both+both,ancestral,both,both+both,both,both+both,both+both,both+both,both+both,both+both,both+both,both,both+both,both+both,both+both,ancestral,both,both,ancestral+both,ancestral+ancestral,both+both,both+both,both+derived,both+both,both+both,both+both,both,both+both,both,both+both	0.0332,0.0148,0.027000000000000003,0.0386,0.0193,0.0542,0.00201,0.00525,0.006409999999999999,0.0297,0.0338,0.0239,0.0372,0.00158,0.00822,0.0232,0.0464,0.0293,0.040999999999999995,0.00647,0.0449,0.00943,0.0294,0.0137,0.0409,0.0247,0.0063100000000000005,0.0402,0.0139,0.0474,0.000381	0.0341,0.0156,1,0.0614,0.033,0.0494,0.007090000000000001,0.0169,0.0141,0.0451,0.059000000000000004,0.0408,0.0627,0.00371,0.0175,0.0453,1,0.0288,0.0715,0.0287,1,0.0199,0.0379,0.0224,0.0948,0.0469,0.00605,0.0526,0.0155,0.0621,0.000808
libA_seq455_[chr11:64884858-64885057]	KLF6,MAZ,PATZ1,SP2,ZNF180,ZNF263,ZNF341,ZNF529	-1.3163000000000018,-0.07857000000000092,-0.4647900000000007,-2.504139999999998,-4.064810000000001,-2.2578000000000014,1.8041,-1.1734599999999995	both,ancestral,ancestral,both,ancestral+ancestral,both+both,both,both	0.0337,0.0312,0.0432,0.0316,0.0349,0.0478,0.0641,0.0395	0.0476,1,1,0.0486,1,0.0784,0.0444,0.0479
libA_seq34728_[chr11:64889668-64889867]	EGR1,EGR2,HKR1,KLF10,KLF14,KLF15,KLF3,KLF6,KLF9,MAZ,PATZ1,PRDM9,SP1,SP2,SP3,SP4,VEZF1,WT1,ZBTB17,ZNF180,ZNF263,ZNF281,ZNF341,ZNF444,ZNF467,ZNF529,ZNF770,ZNF774,ZNF880,ZNF93	-9.917539999999999,-5.331000000000001,-6.3738800000000015,-3.8247,-3.948500000000003,-5.08245,-0.35050000000000026,0.4286000000000012,-5.9794,-6.192870000000001,-3.3309999999999995,0.7010000000000005,-5.21646,-3.278400000000005,-1.472299999999997,-4.3443000000000005,-4.703099999999999,-4.9072,-4.3027999999999995,-3.16671,-2.1530000000000005,-9.123719999999999,-2.6476000000000006,-8.55670000000000…	both+both,both,ancestral,both,both,ancestral+ancestral,both,ancestral+derived,both,ancestral+ancestral,both+both,both,ancestral+ancestral,both+both,both+both,both+both,both+both,both+both,both,ancestral+ancestral,ancestral+both,both+both,both+both,ancestral,both+both,both+both,both,ancestral,both+both,both	0.0448,0.00834,0.0336,0.0253,0.0179,0.0475,0.0253,0.0374,0.0198,0.00633,0.016,0.0148,0.0292,0.00818,0.00763,0.00292,0.00663,0.00639,0.0103,0.0415,0.0395,0.0419,0.0219,0.0451,0.0357,0.0211,0.0738,0.0416,0.0143,0.0344	0.153,0.0332,1,0.0641,0.0949,1,0.0282,0.0331,0.0986,1,0.0353,0.0129,1,0.0362,0.00983,0.012,0.0272,0.0179,0.0345,1,0.0608,0.10400000000000001,0.0368,1,0.0641,0.0523,0.0476,1,0.0286,0.0682
libA_seq162701_[chr11:64891247-64891446]
libA_seq284496_[chr11:64893052-64893251]
libB_seq3593_[chr11:64893152-64893351]
libB_seq71432_[chr11:64896708-64896907]
libB_seq10703_[chr11:64899239-64899438]
libB_seq29992_[chr11:64900185-64900384]
libB_seq311855_[chr11:64900644-64900843]	KLF15,MAZ,PATZ1,SP3,VEZF1,WT1,ZNF180,ZNF467,ZNF770,ZNF880	2.484580000000001,1.9499700000000004,0.6972299999999994,1.2963000000000005,1.9090999999999987,0.5876300000000008,3.26853,1.612239999999999,3.224499999999999,-1.68518	both,derived,derived,both,both,derived,both,derived+derived,both,ancestral	0.0481,1,1,0.0539,0.0248,1,0.0567,1,0.0618,0.0298	0.0288,0.0197,0.0408,0.0417,0.0143,0.0468,0.0333,0.0267,0.0373,1
libA_seq74851_[chr11:64902283-64902482]
libA_seq64689_[chr11:64902790-64902989]	ZNF567	-1.2131	both	0.0427	0.0481
libA_seq161184_[chr11:64907834-64908033]
libA_seq254060_[chr11:64911416-64911615]	ZNF436	-6.88659	both	0.0493	0.148
libB_seq76871_[chr11:64913306-64913505]
libB_seq26714_[chr11:64918287-64918486]
libA_seq277571_[chr11:64925697-64925896]	ZNF287,ZNF774	-1.2894799999999993,-4.6545999999999985	both+both,ancestral	0.0176,0.0264	0.0241,1
libB_seq316104_[chr11:64925716-64925915]	ZNF287,ZNF774	-1.2894799999999993,-4.6545999999999985	both+both,ancestral	0.0176,0.0264	0.0241,1
libA_seq78897_[chr11:64926587-64926786]
libB_seq79420_[chr11:65112296-65112495]	PATZ1,ZNF304,ZNF880	-4.542299999999999,-1.093399999999999,-0.6573999999999991	both,both,both	0.013000000000000001,0.009559999999999999,0.0085	0.0365,0.0136,0.00983
libA_seq113693_[chr11:65115355-65115554]
libB_seq306454_[chr11:65131550-65131749]
libB_seq161087_[chr11:65141402-65141601]	KLF6,SP4	-2.4795800000000003,-4.05733	ancestral,ancestral	0.046,0.0413	1,1
libB_seq7077_[chr11:65154503-65154702]	EGR2,KLF15,MAZ,PATZ1,SP1,SP2,SP3,SP4,VEZF1,WT1,ZNF263,ZNF432,ZNF467,ZNF529,ZNF770	-0.2085999999999988,-0.3298999999999985,-1.2286000000000001,-2.4506999999999994,-6.876339999999999,-2.504200000000001,-3.3240599999999993,-3.475439999999999,-1.6303,-1.5876300000000008,5.57142,-2.01,-1.1758999999999986,-2.0305999999999997,-1.989799999999999	both,both,both+both,both+both,both,both+both,both,both,both+both,both,both+both,ancestral,both+both,both+both,both	0.0301,0.0441,0.00607,0.0134,0.0324,0.0295,0.0328,0.0439,0.0143,0.0352,0.0377,0.033,0.00793,0.0199,0.017	0.0316,0.047,0.00839,0.023,0.0776,0.0462,0.0657,0.0814,0.0228,0.046,0.00953,1,0.0105,0.027000000000000003,0.0295
libA_seq22526_[chr11:65156382-65156581]
libA_seq268131_[chr11:65163033-65163232]	VEZF1,WT1,ZBTB17,ZNF304	0.7212499999999995,2.742280000000001,2.66057,-3.5701	derived,derived,derived,both	1,1,1,0.0428	0.0289,0.0319,0.0321,0.0774
libA_seq212446_[chr11:65164721-65164920]	ZNF467	-1.22449	ancestral	0.0292	1
libA_seq221627_[chr11:65169916-65170115]
libA_seq125553_[chr11:65169917-65170116]
libB_seq207443_[chr11:65171111-65171310]	ZNF212	-5.01024	ancestral	0.0468	1
libA_seq83342_[chr11:65171647-65171846]	KLF11,PRDM9,ZNF93	-2.340160000000001,1.0654199999999996,1.0141999999999989	both,both,both	0.0425,0.0498,0.062	0.0534,0.0405,0.0485
libB_seq106484_[chr11:65183055-65183254]	HKR1,PATZ1,ZNF341	2.3177999999999983,0.7957300000000007,1.213099999999999	both,derived,derived	0.0538,1,1	0.035,0.0399,0.0431
libB_seq38905_[chr11:65186739-65186938]
libB_seq39143_[chr11:65188331-65188530]
libA_seq41970_[chr11:65188608-65188807]	MAZ,PATZ1	0.9571400000000008,1.4859399999999994	derived,both	1,0.0467	0.0253,0.0331
libB_seq48258_[chr11:65188852-65189051]	ZNF529	-8.83676	both	0.0306	0.0867
libA_seq240030_[chr11:65192649-65192848]
libA_seq94155_[chr11:65198010-65198209]
libB_seq125757_[chr11:65203244-65203443]
libA_seq264926_[chr11:65539234-65539433]	ZNF235,ZNF287,ZNF487	-0.49019999999999975,-1.0350899999999994,-8.82828	ancestral,ancestral+ancestral,both	0.0414,0.0283,0.031	1,1,0.0759
libB_seq57646_[chr11:66361414-66361613]
libA_seq301649_[chr11:66387588-66387787]
libB_seq155306_[chr11:66400338-66400537]
libB_seq18946_[chr11:66405478-66405677]	ZNF93	2.4286	both	0.0671	0.0448
libB_seq21556_[chr11:66406404-66406603]
libA_seq20866_[chr11:66406597-66406796]	ZNF432	-0.31	both	0.0384	0.0402
libB_seq41726_[chr11:66407012-66407211]
libB_seq181479_[chr11:66407884-66408083]
libB_seq262982_[chr11:66416068-66416267]	ZNF432	2.16	both	0.0283	0.0201
libA_seq196867_[chr11:66424759-66424958]	ZNF33A	-6.49484	both	0.0404	0.128
libA_seq28549_[chr11:66445854-66446053]	ZNF212	1.95918	both+both	0.0066	0.00409
libB_seq22718_[chr11:66454105-66454304]	PATZ1,ZNF341,ZNF383,ZNF467,ZNF529	-2.2817299999999996,-1.7212999999999994,-3.96296,-1.5816299999999996,6.9183699999999995	ancestral,both,both,ancestral,derived	0.0283,0.0303,0.0414,0.0269,1	1,0.0447,0.0659,1,0.0392
libA_seq246117_[chr11:66459142-66459341]	SP3,SP4,VEZF1,ZNF180,ZNF263,ZNF341,ZNF792	-1.4167000000000005,-0.22129999999999939,-0.12121999999999922,-3.7870799999999996,-1.7039999999999988,-2.1884999999999994,-9.91753	both,both,ancestral,ancestral+both,both,ancestral+ancestral,both	0.0203,0.0391,0.0338,0.0284,0.0193,0.0345,0.0333	0.0258,0.0405,1,0.0538,0.0289,1,0.0842
libB_seq152072_[chr11:66459875-66460074]	WT1,ZNF283,ZNF341,ZNF880	-1.9072600000000008,-2.962999999999999,-1.4344000000000001,-0.09259000000000128	both,both,ancestral,ancestral	0.0269,0.0423,0.0408,0.0413	0.0381,0.0486,1,1
libA_seq47147_[chr11:66465733-66465932]
libA_seq35623_[chr11:66492503-66492702]
libA_seq103011_[chr11:66498908-66499107]
libB_seq4880_[chr11:66505095-66505294]
libA_seq118681_[chr11:66516535-66516734]
libA_seq70128_[chr11:66531711-66531910]
libA_seq34215_[chr11:66553165-66553364]
libA_seq173909_[chr11:66563822-66564021]
libA_seq113460_[chr11:66575995-66576194]	ZNF235	-0.26471	ancestral	0.0436	1
libB_seq136217_[chr11:66580669-66580868]
libA_seq313030_[chr11:66597833-66598032]
libB_seq219902_[chr11:66599056-66599255]
libB_seq252006_[chr11:66602703-66602902]	ZNF235,ZNF287	-1.2157,-0.7895000000000003	both,both	0.0112,0.0109	0.0166,0.0137
libB_seq228501_[chr11:66618767-66618966]	PATZ1,WT1,ZNF180,ZNF283,ZNF780A	-3.1831300000000002,-0.9587699999999995,-4.676,-6.1759499999999985,-2.0619000000000014	ancestral+ancestral,ancestral,both,ancestral,both	0.0224,0.0442,0.0131,0.05,0.0235	1,1,0.0325,1,0.0359
libB_seq130799_[chr11:66735638-66735837]
libA_seq55806_[chr11:66752086-66752285]	KLF15,KLF6,MAZ,PATZ1,PRDM9,SP1,SP2,SP3,VEZF1,WT1,ZNF180,ZNF263,ZNF341,ZNF432,ZNF467,ZNF880	2.288599999999999,-0.12239999999999895,1.4429000000000016,1.3169000000000004,1.757019999999999,1.5464000000000002,-0.3058000000000014,1.4167000000000005,1.0545000000000009,2.721680000000001,1.9907400000000006,2.9694199999999995,1.8934399999999982,1.75,5.34263,-0.05555999999999983	both+both,both,both+both,both+derived,both+derived,both+both,both,both,both+both,derived+derived,derived,both+both,both,derived+derived,both+both,both+both	0.00938,0.0144,0.0035299999999999997,0.04,0.0412,0.0358,0.0388,0.0404,0.0158,1,1,0.0355,0.0536,1,0.0258,0.0309	0.0056700000000000006,0.0146,0.00243,0.0295,0.0296,0.0297,0.0406,0.0289,0.0116,0.0321,0.0498,0.0177,0.0363,0.0345,0.00811,0.0313
libB_seq102132_[chr11:67836337-67836536]
libA_seq172654_[chr11:67892735-67892934]
libA_seq202430_[chr11:68885947-68886146]	CTCF,ZNF182,ZNF235,ZNF384	1.225500000000002,1.4034999999999993,-3.2156599999999997,-2.2843	both+both,both+both,ancestral,ancestral+ancestral	0.0187,0.0396,0.0196,0.0236	0.0187,0.0396,1,1
libA_seq155386_[chr11:68897850-68898049]	PATZ1,SP3,VEZF1,WT1,ZNF467	-0.5282,-0.7776999999999994,-2.2727499999999985,-1.1958800000000007,-1.1296300000000015	both,both,ancestral,ancestral,ancestral+ancestral	0.0311,0.049,0.0185,0.0427,0.0281	0.0349,0.0559,1,1,1
libB_seq210008_[chr11:69310837-69311036]	ZNF263	0.15306	derived	1	0.0455
libB_seq56243_[chr11:69475941-69476140]
libA_seq201000_[chr11:69640776-69640975]	EGR2,KLF3,KLF6,MAZ,PATZ1,PRDM9,SP2,SP3,SP4,WT1,ZNF180,ZNF529	0.5540000000000003,-1.7423000000000002,-0.35710000000000086,0.9285999999999994,1.4507300000000019,-1.5887399999999996,1.0908999999999995,-1.7315000000000005,1.6065000000000005,-0.15470000000000006,-2.888889999999998,6.489799999999999	both,both,both+both,both,ancestral+derived,both+both,both+both,both+both,both,both+both,both,derived	0.0482,0.040999999999999995,0.0455,0.0183,0.0441,0.0371,0.0183,0.0184,0.0544,0.0315,0.036000000000000004,1	0.0424,0.0565,0.049,0.0144,0.0316,0.0509,0.013999999999999999,0.0254,0.0396,0.0324,0.0572,0.0415
libA_seq128871_[chr11:69643919-69644118]
libB_seq278182_[chr11:69690840-69691039]
libA_seq7319_[chr11:70317330-70317529]
libA_seq253001_[chr11:70323591-70323790]
libA_seq242887_[chr11:70328481-70328680]	PATZ1,SP2,SP3,SP4,VEZF1,WT1,ZBTB17,ZNF383,ZNF432	-0.9788300000000003,-0.12390000000000079,-0.16660000000000075,1.7213000000000012,1.25455,-0.6391799999999979,0.8165000000000013,3.06485,1.9400000000000004	ancestral,both,both,both,derived,both,both,both,derived	0.0383,0.0434,0.0361,0.0619,1,0.0435,0.0313,0.0503,1	1,0.0444,0.0381,0.0449,0.0248,0.0482,0.025,0.0359,0.0334
libA_seq80876_[chr11:70328579-70328778]	KLF15,MAZ,PATZ1,SP2,SP4,VEZF1,WT1,ZBTB17,ZNF263,ZNF341,ZNF383,ZNF432,ZNF467,ZNF93	1.1443299999999992,1.692870000000001,1.19013,-0.12397000000000169,1.7212999999999994,2.23635,0.9793900000000004,0.8164999999999996,3.7629200000000003,1.885200000000001,1.6018999999999988,3.0700000000000003,0.9629600000000007,3.549999999999999	derived,derived+derived,derived,both,both,derived+derived,derived,both,derived,both+both,both,both+derived,both+both,both	1,1,1,0.0499,0.0593,1,1,0.0199,1,0.0486,0.0402,0.035,0.0247,0.0839	0.0495,0.021,0.0364,0.051,0.0426,0.0187,0.044000000000000004,0.0156,0.0438,0.0329,0.0353,0.0218,0.0207,0.047
libA_seq156026_[chr11:70330343-70330542]
libB_seq289799_[chr11:70334867-70335066]	SP2,SREBF2,TFAP2C,ZNF180	-1.9090800000000012,0.4444999999999997,-1.8144000000000027,-1.712959999999999	ancestral,both,both,both	0.0452,0.0614,0.0367,0.0445	1,0.0445,0.0666,0.0565
libA_seq283689_[chr11:70367874-70368073]	ZNF263	-5.35052	ancestral	0.0327	1
libA_seq166959_[chr11:70675632-70675831]	EGR2,HKR1,KLF1,KLF12,KLF15,KLF3,KLF5,KLF6,MAZ,PATZ1,PRDM9,RXRA,SP1,SP2,SP3,SP4,VEZF1,WT1,ZBTB17,ZNF180,ZNF263,ZNF304,ZNF341,ZNF432,ZNF467,ZNF529,ZNF880	3.2517899999999997,4.36448,1.247399999999999,0.9484999999999992,3.7011000000000003,1.2784000000000013,2.1442999999999977,1.724499999999999,1.757200000000001,2.9154999999999998,4.0281,1.3643,2.5772999999999993,1.0412999999999961,1.75,2.2048999999999985,2.5212000000000003,3.4432799999999997,2.1468000000000007,3.9815000000000005,3.806119999999998,4.4953,4.6495,3.5999999999999996,6.206180000000002,1.…	derived,derived,both+both,both,both+both,both,both,both,both+both,both+both,both+both,both,both+both,both+both,both+both,both,both+both,both+both,both+both,both+both,both+both,both,derived+derived,derived+derived,derived+derived,both,both+derived	1,1,0.036000000000000004,0.0631,0.00765,0.0108,0.0477,0.0107,0.00359,0.0137,0.0355,0.0416,0.0508,0.00671,0.0128,0.00584,0.00713,0.0359,0.0149,0.0342,0.0376,0.0807,1,1,1,0.0523,0.0377	0.0386,0.0485,0.0343,0.0349,0.00295,0.00795,0.0243,0.0087,0.0022600000000000003,0.006959999999999999,0.0148,0.0317,0.0267,0.004370000000000001,0.00932,0.00292,0.00297,0.0184,0.00891,0.0155,0.0149,0.0377,0.0313,0.0259,0.0399,0.0464,0.013999999999999999
libB_seq227854_[chr11:71007554-71007753]	ZNF287,ZNF384	-3.2368500000000004,-1.745099999999999	both+both,both	0.0101,0.0236	0.0235,0.0617
libB_seq114023_[chr11:72472357-72472556]
libB_seq28496_[chr11:72478850-72479049]
libB_seq150486_[chr11:72479423-72479622]	ZNF792	0.49484	both	0.0333	0.0333
libA_seq101854_[chr11:72485033-72485232]	FLI1,PATZ1,SP2,SP3,VEZF1,WT1,ZNF180,ZNF267,ZNF341,ZNF383,ZNF432,ZNF467,ZNF880	0.402000000000001,0.3591999999999995,2.074399999999999,1.4444000000000017,0.5273000000000003,1.6700999999999997,-0.04630000000000045,6.1944,1.618500000000001,-1.1944499999999998,2.7700000000000005,-1.2142499999999998,-0.6943999999999999	both,both,both,both+both,both+both,both,both,both,both+both,both,both+both,both+both,both	0.0464,0.0319,0.0403,0.0585,0.006490000000000001,0.0181,0.0287,0.0761,0.0608,0.0466,0.0382,0.0238,0.0248	0.0423,0.0295,0.0285,0.0447,0.0054399999999999995,0.0131,0.0289,0.0373,0.0442,0.0541,0.0246,0.0312,0.0287
libA_seq21753_[chr11:72485695-72485894]	ZNF341	-1.9508	both+both	0.0298	0.0453
libB_seq90115_[chr11:72486175-72486374]
libA_seq149475_[chr11:72486874-72487073]	EGR2,KLF15,MAZ,SP1,SP3,WT1,ZNF263,ZNF774	-3.2877899999999993,-4.556700000000001,-1.2714700000000008,-5.0412,-2.3148,-2.5979800000000015,-1.5510300000000008,-4.927299999999999	ancestral,both+both,ancestral,both+both,both,ancestral,ancestral,ancestral	0.0381,0.0144,0.0233,0.02,0.0384,0.0329,0.0337,0.0248	1,0.0355,1,0.0654,0.0601,1,1,1
libB_seq31422_[chr11:72488018-72488217]	FLI1,MAZ,PATZ1,PRDM9,RXRA,SP2,SP3,TFAP2A,TFAP2C,WT1,ZBTB17,ZNF281,ZNF383	-2.3298999999999985,-0.75,-1.5845300000000009,-1.785050000000001,-4.742800000000001,-3.7438000000000002,-2.0462500000000006,-2.814399999999999,-3.855599999999999,-0.9484600000000007,-4.7064699999999995,-4.8351,-3.000000000000001	both,ancestral,ancestral,ancestral,both,both+both,ancestral,both,both,ancestral,ancestral,ancestral,both	0.0453,0.0266,0.0334,0.0424,0.0393,0.028999999999999998,0.0477,0.0481,0.0367,0.0442,0.0177,0.0435,0.048	0.0729,1,1,1,0.11800000000000001,0.0551,1,0.0944,0.10800000000000001,1,1,1,0.0669
libA_seq23260_[chr11:72488049-72488248]	FLI1,MAZ,PATZ1,PRDM9,RXRA,SP2,SP3,TFAP2A,TFAP2C,WT1,ZBTB17,ZNF281,ZNF383	-2.3298999999999985,-0.75,-1.5845300000000009,-1.785050000000001,-4.742800000000001,-3.7438000000000002,-2.0462500000000006,-2.814399999999999,-3.855599999999999,-0.9484600000000007,-4.7064699999999995,-4.8351,-3.000000000000001	both,ancestral,ancestral,ancestral,both,both+both,ancestral,both,both,ancestral,ancestral,ancestral,both	0.0453,0.0266,0.0334,0.0424,0.0393,0.028999999999999998,0.0477,0.0481,0.0367,0.0442,0.0177,0.0435,0.048	0.0729,1,1,1,0.11800000000000001,0.0551,1,0.0944,0.10800000000000001,1,1,1,0.0669
libA_seq87132_[chr11:72488070-72488269]	FLI1,MAZ,PATZ1,PRDM9,RXRA,SP2,SP3,TFAP2A,TFAP2C,VEZF1,WT1,ZBTB17,ZNF281,ZNF383	-2.3298999999999985,-0.75,-1.5845300000000009,-1.785050000000001,-4.742800000000001,-3.7438000000000002,-2.0462500000000006,-2.814399999999999,-3.855599999999999,-0.19393999999999956,-0.9484600000000007,-4.7064699999999995,-4.8351,-3.000000000000001	both,ancestral,ancestral,ancestral,both,both+both,ancestral,both,both,ancestral,ancestral,ancestral,ancestral,both	0.0453,0.0266,0.0334,0.0424,0.0393,0.028999999999999998,0.0477,0.0481,0.0367,0.0332,0.0442,0.0177,0.0435,0.048	0.0729,1,1,1,0.11800000000000001,0.0551,1,0.0944,0.10800000000000001,1,1,1,1,0.0669
libB_seq24137_[chr11:72488161-72488360]	EGR2,KLF6,MAZ,PATZ1,PRDM9,SP2,VEZF1,ZIM2,ZNF341,ZNF467,ZNF529,ZNF880	-4.381300000000001,-3.5305999999999997,-0.12143000000000015,-2.3450000000000006,-1.8598200000000018,-1.578520000000001,-0.19393999999999956,0.6700999999999997,-1.2212999999999994,-2.6530999999999993,-4.1633,-1.2129699999999985	both,both,ancestral,both,ancestral,ancestral,ancestral,both,both,ancestral+ancestral,both,both+both	0.0201,0.0259,0.0309,0.0228,0.0418,0.0481,0.0332,0.0432,0.0267,0.0209,0.0153,0.0291	0.0553,0.0637,1,0.04,1,1,1,0.0388,0.0342,1,0.0275,0.0377
libA_seq29845_[chr11:72488252-72488451]	MAZ,PRDM9,ZIM2,ZNF341,ZNF467,ZNF529,ZNF880	-0.12143000000000015,-1.8598200000000018,0.6700999999999997,-1.2212999999999994,-2.6530999999999993,-4.1633,-1.2129699999999985	ancestral,ancestral,both,both,ancestral+ancestral,both,both+both	0.0309,0.0418,0.0432,0.0267,0.0209,0.0153,0.0291	1,1,0.0388,0.0342,1,0.0275,0.0377
libA_seq58002_[chr11:72489071-72489270]
libA_seq86478_[chr11:72489314-72489513]	ZNF880	-3.72221	ancestral	0.0196	1
libB_seq46560_[chr11:72489767-72489966]
libB_seq25011_[chr11:72490611-72490810]	FLI1,HKR1,IRF3,KLF15,KLF6,MAZ,PATZ1,PRDM9,PTF1A,SP2,SP3,VEZF1,WT1,ZBTB17,ZNF132,ZNF263,ZNF341,ZNF383,ZNF432,ZNF467,ZNF774,ZNF880	-4.4330300000000005,-4.5046800000000005,-4.0158000000000005,-0.7216000000000005,0.12239999999999895,-1.9713999999999992,-4.5564,-0.9440000000000008,-1.6296,1.3553800000000003,-0.4906999999999986,-3.4121000000000006,-3.371130000000001,-2.7523,-4.7934,-2.6122999999999994,-1.3195999999999994,0.7685000000000031,-7.85,-3.1111000000000004,-0.8727,-1.9628999999999994	ancestral+ancestral,ancestral,both,both+both,both+both,both+both,both+both,both+both,both,derived,both,both+both,both+both,both+both,both,both+both,both+both,both,both+both,both+both,both,both+both	0.0391,0.0481,0.0234,0.028999999999999998,0.0204,0.00165,0.00277,0.0265,0.0308,1,0.0437,0.0018899999999999998,0.019,0.0171,0.0402,0.0042899999999999995,0.035,0.0148,0.007259999999999999,0.00517,0.0437,0.0133	1,1,0.0473,0.0341,0.0193,0.00305,0.0103,0.0323,0.0658,0.0499,0.0483,0.006220000000000001,0.0362,0.037000000000000005,0.0892,0.00806,0.0462,0.0142,0.0327,0.0106,0.0536,0.0196
libA_seq45310_[chr11:72491024-72491223]
libB_seq27570_[chr11:72491146-72491345]
libA_seq24396_[chr11:72491476-72491675]	ZNF432	0.08	both+both	0.0254	0.0252
libA_seq43302_[chr11:72713933-72714132]
libA_seq316274_[chr11:72730676-72730875]
libA_seq260557_[chr11:72744850-72745049]
libB_seq26149_[chr11:72797686-72797885]
libA_seq120434_[chr11:72847386-72847585]	WT1,ZNF263,ZNF467	-0.39176000000000144,4.183630000000001,2.6481500000000002	ancestral,derived,derived+derived	0.0485,1,1	1,0.0179,0.0209
libA_seq206160_[chr11:72875400-72875599]
libB_seq85928_[chr11:72912163-72912362]
libB_seq30215_[chr11:72912499-72912698]	KLF6,ZNF283,ZNF467	3.1632800000000003,4.416600000000001,-5.154680000000001	derived,both,ancestral	1,0.0762,0.0476	0.0391,0.0465,1
libA_seq112154_[chr11:72912944-72913143]
libB_seq15002_[chr11:74768055-74768254]	ZNF263	-1.03059	both	0.0332	0.0409
libA_seq188504_[chr11:75144482-75144681]
libA_seq8620_[chr11:75631583-75631782]
libA_seq6526_[chr11:75724400-75724599]	PRDM9	-0.8411	both	0.0259	0.0308
libA_seq304419_[chr11:75737107-75737306]
libA_seq2541_[chr11:75742491-75742690]	ZNF235	-1.85296	ancestral	0.0291	1
libB_seq321219_[chr11:75758578-75758777]	FLI1	-3.28863	ancestral	0.0498	1
libA_seq136408_[chr11:75837736-75837935]	FLI1,PRDM9,ZBTB17,ZNF484,ZNF880	3.597999999999999,1.28038,2.0642700000000005,3.898199999999999,1.5462999999999996	both,derived,derived,both,derived	0.0854,1,1,0.0701,1	0.0406,0.0471,0.0378,0.0361,0.0307
libB_seq210346_[chr11:76287924-76288123]
libA_seq67003_[chr11:76516700-76516899]
libA_seq32868_[chr11:76778472-76778671]	KLF6,MAZ,PATZ1,RXRA,SP1,SP2,SP3,SP4,VEZF1,WT1,ZBTB17,ZNF180,ZNF281,ZNF304,ZNF341,ZNF383,ZNF467,ZNF529,ZNF792,ZNF880	0.8060999999999989,-0.9285999999999994,1.7745999999999995,-1.2072000000000003,0.9896900000000004,1.611600000000001,1.4166999999999987,1.8606999999999996,-0.20609999999999928,2.0206,1.0458999999999996,3.1667000000000005,0.8452999999999999,1.4765999999999995,1.7212999999999994,1.120379999999999,1.777779999999999,8.41836,9.917494999999999,0.27780000000000094	both+both,both+both,both+both,both,both,both+both,both+both,both,both+both,both+both,both,both+both,both+both,both,both+both,both,both+derived,both,both,both	0.0556,0.009009999999999999,0.0171,0.0365,0.0509,0.0377,0.0257,0.0408,0.00997,0.0249,0.0172,0.0397,0.0288,0.0544,0.0348,0.048,0.0339,0.081,0.09699999999999999,0.0144	0.0465,0.0116,0.0118,0.0504,0.0458,0.0285,0.0203,0.0297,0.0106,0.0168,0.0127,0.0211,0.0255,0.0379,0.0249,0.042,0.0237,0.0297,0.0389,0.0137
libB_seq257783_[chr11:76804595-76804794]	EGR2,KLF15,KLF3,KLF6,MAZ,PATZ1,PRDM9,SP1,SP2,SP3,SP4,VEZF1,WT1,ZBTB17,ZNF180,ZNF263,ZNF281,ZNF341,ZNF383,ZNF432,ZNF467,ZNF484,ZNF880	-3.410119999999999,7.3917399999999995,6.1649699999999985,4.050980000000001,3.5642999999999994,4.253499999999999,1.2336400000000012,7.77323,3.735569999999999,1.1110999999999986,4.041,2.2120999999999977,3.5052000000000003,1.3301999999999996,5.3148,4.3402199999999995,4.2268,8.340200000000001,5.842600000000001,3.369999999999999,3.959200000000001,-1.2870000000000026,2.4352	both,both+both,derived,derived+derived,both+both,both+both,both+both,derived+derived,both+derived,both+both,both,both+both,both+both,both+both,both,derived+derived,derived,derived+derived,both+both,both+both,both+both,both,both+both	0.0357,0.0607,1,1,0.0108,0.0171,0.0518,1,0.0542,0.0432,0.0587,0.00566,0.0196,0.0236,0.0467,1,1,1,0.0359,0.00644,0.0136,0.0231,0.0268	0.0751,0.0139,0.040999999999999995,0.0306,0.00392,0.00639,0.0409,0.0323,0.0286,0.0327,0.0271,0.00256,0.00953,0.016,0.0168,0.0391,0.0487,0.0128,0.0158,0.00246,0.00507,0.0341,0.0163
libB_seq242145_[chr11:77538851-77539050]	ZNF287	-1.36842	ancestral	0.0265	1
libB_seq205441_[chr11:77538859-77539058]	ZNF287	-1.36842	ancestral	0.0265	1
libA_seq138356_[chr11:78559047-78559246]	ZNF487	0.08081	both	0.0417	0.0415
libB_seq72276_[chr11:78742636-78742835]	PRDM9,SP2	-0.5139999999999993,2.6859800000000007	both,derived	0.00314,1	0.0034799999999999996,0.0397
libA_seq111700_[chr11:78859407-78859606]
libB_seq17811_[chr11:79161237-79161436]	ZNF235	0.40196	derived	1	0.0425
libB_seq47124_[chr11:79239769-79239968]
libA_seq67986_[chr11:80819602-80819801]	CTCF,PRDM6,ZNF182,ZNF235,ZNF287,ZNF384,ZNF487	-3.960699999999999,-4.39808,-3.2455999999999996,0.04899999999999949,-1.2631999999999994,-2.0098000000000003,-9.41414	ancestral+both,ancestral+ancestral,ancestral,both+both,both+both,both+both,both	0.0187,0.0227,0.0396,0.0035399999999999997,0.00982,0.0236,0.0202	0.094,1,1,0.00345,0.0142,0.0806,0.0644
libA_seq71344_[chr11:80929817-80930016]	MAZ,PRDM9,ZBTB17,ZNF263,ZNF432,ZNF467,ZNF880	-1.1143,-2.1775599999999997,1.6697699999999998,-2.8367000000000004,-2.9299999999999997,-3.867300000000001,-1.361110000000001	both,both,derived,both,ancestral+ancestral,ancestral+ancestral,ancestral+ancestral	0.0153,0.0271,1,0.009890000000000001,0.0287,0.0158,0.0317	0.0206,0.0414,0.0417,0.0206,1,1,1
libB_seq137511_[chr11:81023271-81023470]
libA_seq91066_[chr11:81460958-81461157]
libA_seq65980_[chr11:81583001-81583200]
libB_seq68858_[chr11:81583028-81583227]
libB_seq9898_[chr11:82330011-82330210]
libA_seq200042_[chr11:83060023-83060222]	EGR2,FOXG1,RREB1,ZBTB26,ZSCAN16	-0.5396000000000001,-3.2371,-1.8453000000000017,0.8264999999999993,-7.186240000000001	both,ancestral,both+both,both,both+both	0.0301,0.0144,0.0314,0.0471,0.00884	0.0335,1,0.0314,0.0366,0.0642
libB_seq130132_[chr11:83071806-83072005]	PRDM6,ZNF235,ZNF384	-0.15529999999999866,-1.0980600000000003,-1.960799999999999	both,ancestral,ancestral+ancestral	0.0114,0.0358,0.0312	0.0122,1,1
libB_seq6325_[chr11:84540624-84540823]
libA_seq2129_[chr11:86995469-86995668]
libA_seq199035_[chr11:88153140-88153339]	CTCF,PRDM6,ZNF182,ZNF235,ZNF287,ZNF384,ZNF487	-3.960699999999999,-2.4174799999999994,-4.2105,-3.0686,-5.6667000000000005,-2.1584000000000003,-9.41414	ancestral+both,ancestral,both+both,both+both,both+both,ancestral+ancestral,both+both	0.0187,0.0422,0.0396,0.004,0.000346,0.0452,0.0191	0.094,1,0.0997,0.0126,0.00307,1,0.0617
libB_seq271845_[chr11:88156544-88156743]	ZNF225,ZNF235,ZNF287	-5.4444,-0.44120000000000026,-0.19299999999999784	both,both+both,both+both	0.0473,0.00923,0.0018	0.0859,0.0106,0.0019
libA_seq248136_[chr11:90010544-90010743]
libA_seq286540_[chr11:90236367-90236566]
libA_seq134939_[chr11:90430106-90430305]
libA_seq270207_[chr11:90787389-90787588]
libA_seq271502_[chr11:93284260-93284459]
libA_seq320410_[chr11:93819024-93819223]	PRDM6,ZNF235,ZNF263,ZNF287	-0.6602000000000015,-0.38236000000000026,-0.7958999999999996,0.07894999999999985	both,ancestral,both,derived	0.0311,0.0427,0.0275,1	0.038,1,0.0332,0.0346
libB_seq24437_[chr11:94708235-94708434]
libA_seq27584_[chr11:94708236-94708435]
libB_seq62485_[chr11:95675584-95675783]
libB_seq88522_[chr11:97007556-97007755]
libB_seq83725_[chr11:98438644-98438843]	CTCF,ZNF182,ZNF384	-5.17643,-5.3858999999999995,-0.18630000000000102	ancestral,ancestral,both+both	0.0187,0.0396,0.027000000000000003	1,1,0.0312
libA_seq152887_[chr11:99664040-99664239]
libA_seq300121_[chr11:99759626-99759825]	ZNF880	1.33333	derived	1	0.0319
libB_seq251617_[chr11:100529358-100529557]	ZNF287	2.85091	both	0.0251	0.0121
libA_seq211879_[chr11:101444689-101444888]
libB_seq245031_[chr11:101444691-101444890]
libA_seq224271_[chr11:102082803-102083002]
libB_seq285152_[chr11:102479319-102479518]	CTCF,ZNF235	-2.0490000000000013,-1.9804200000000005	both,both	0.0291,0.0221	0.0689,0.038
libA_seq12719_[chr11:103403986-103404185]	ZNF880	0.4351	both	0.0079	0.00697
libB_seq22478_[chr11:105257248-105257447]
libB_seq56690_[chr11:105545015-105545214]
libB_seq314330_[chr11:105725185-105725384]	MAZ,PRDM9,VEZF1,ZNF263,ZNF287,ZNF432,ZNF770,ZNF774,ZNF880	-1.1999700000000004,-3.3271000000000015,-2.5090000000000003,-2.051030000000001,-0.48240000000000016,-1.870000000000001,-4.785739999999999,-3.0363999999999987,-1.4999899999999986	ancestral,both,both+both,ancestral+ancestral,both,both+both,ancestral,both,both+both	0.0238,0.00379,0.007940000000000001,0.03,0.00852,0.00896,0.0373,0.0302,0.023	1,0.0107,0.0167,1,0.00975,0.0137,1,0.0622,0.0314
libA_seq4782_[chr11:106221025-106221224]	CTCF,IRF3,ZNF880	-1.8138000000000005,-3.984160000000001,-0.13889000000000085	both,ancestral,ancestral	0.0476,0.0391,0.0409	0.0893,1,1
libB_seq41917_[chr11:106941861-106942060]
libA_seq294357_[chr11:107384745-107384944]
libA_seq102809_[chr11:108031196-108031395]	CTCF,ZNF384	-3.6372999999999998,-2.1584000000000003	both,ancestral+ancestral	0.0291,0.0452	0.098,1
libB_seq19158_[chr11:108620185-108620384]	ZNF235,ZNF432	-0.22549000000000063,-0.6399999999999997	ancestral,ancestral	0.044000000000000004,0.0408	1,1
libB_seq200425_[chr11:108621999-108622198]
libB_seq68932_[chr11:108626997-108627196]
libA_seq56812_[chr11:108653693-108653892]
libB_seq217794_[chr11:108659633-108659832]	ZNF383,ZNF768	-1.5370300000000015,6.3298000000000005	both,both+both	0.0456,0.14400000000000002	0.0545,0.0436
libA_seq267407_[chr11:108677987-108678186]
libA_seq222220_[chr11:108684768-108684967]
libB_seq266780_[chr11:108687592-108687791]
libB_seq156875_[chr11:108688381-108688580]
libB_seq41819_[chr11:108691283-108691482]
libA_seq188146_[chr11:108709744-108709943]
libB_seq179817_[chr11:108710872-108711071]
libA_seq219188_[chr11:108726621-108726820]	PRDM6,ZNF235,ZNF287,ZNF35,ZNF487	1.3204000000000011,-3.3823000000000008,-1.5701999999999998,-0.561399999999999,-9.0505	both,both+both,both+both,both+both,both	0.052000000000000005,0.0169,0.00367,0.019,0.0376	0.0354,0.0427,0.00591,0.019,0.0881
libA_seq190652_[chr11:108759283-108759482]
libA_seq10404_[chr11:108771012-108771211]
libA_seq250130_[chr11:108773853-108774052]	EGR2,IRF3,KLF15,MAZ,PATZ1,VEZF1,WT1,ZBTB17,ZNF263,ZNF281,ZNF341,ZNF432,ZNF467,ZNF880	3.3956899999999983,-1.968300000000001,2.896939999999999,1.2286000000000001,0.8450299999999995,2.6485000000000003,0.9484600000000007,2.5504700000000007,3.1837000000000018,4.3092999999999995,1.1557000000000013,2.9499999999999993,1.908199999999999,2.9628999999999994	derived,both,both,both+both,derived+derived,both+both,derived+derived,derived+derived,both+both,derived,ancestral+derived,both,both+both,both+both	1,0.0473,0.0435,0.0116,1,0.0191,1,1,0.0273,1,0.0465,0.0251,0.0195,0.0189	0.0374,0.0697,0.0249,0.00826,0.0393,0.00867,0.0442,0.033,0.0139,0.048,0.0362,0.0148,0.0125,0.0103
[truncated: 12,044 more rows]

## Sheet: supplementary file 3b
Supplementary Table 3. FIMO predicted transcription factor binding alterations and their correlation with expression
TF	ESC expression (FPKM)	Osteoblast expression (FPKM)	NPC expression (FPKM)	Number of differentially active sequences - ESCs	Mean binding score difference (log2) - ESCs	Binding vs expression correlation (Pearson's R) - ESCs	P-value - ESCs	FDR - ESCs	Number of differentially active sequences - Osteoblasts	Mean binding score difference (log2) - Osteoblasts	Binding vs expression correlation (Pearson's R) - Osteoblasts	P-value - Osteoblasts	FDR - Osteoblasts	Number of differentially active sequences - NPCs	Mean binding score difference (log2) - NPCs	Binding vs expression correlation (Pearson's R) - NPCs	P-value - NPCs	FDR - NPCs
PATZ1	98	2.72217	3.12733	12	-0.686617	0.655372	0.0206946	0.0520473	36	-1.06396	0.258839	0.127425	0.191138	29	-0.663183	0.185952	0.334149	0.369323
PRDM9		0.001		13	-1.44141	0.391774	0.185534		33	-2.10988	0.177379	0.32338		22	-2.46177	0.0272449	0.904204
SP1	71	14.0485	5.05692	13	0.0840615	0.375472	0.206135	0.270553	22	-1.45314	0.493057	0.0197218	0.0520473	20	-0.907737	0.625053	0.00321063	0.0219542
VEZF1	35	8.65855	16.8099	17	-0.916572	0.358144	0.158089	0.221325	36	-0.70016	0.432728	0.00838988	0.0354841	23	-0.385235	0.66565	0.000527043	0.0190592
ZNF263	8	8.61986	6.57285	16	-1.43977	0.287471	0.280319	0.3182	38	-0.818316	0.500848	0.00136137	0.0190592	25	-0.80956	0.514869	0.00844859	0.0354841
ZNF467	0.8	0.00345459	1.233	18	-0.839797	0.509616	0.0307443		39	-1.37602	0.497308	0.0012778		26	-0.535546	0.357063	0.0733432	0.133931
ZNF341	10	1.72142	0.191129	15	-0.578485	0.579581	0.0235452	0.0520473	32	-1.10638	0.403621	0.0219738	0.0520473	22	-0.657306	0.30407	0.168883
CTCF	27	9.86267	26.7677	2					2					1
ZNF180	2	1.69701	0.438254	9	-0.17182	-0.0897957	0.818294		26	-0.663469	0.183878	0.368554	0.387759	18	-0.449074	0.0634955	0.802355
ZNF283	2	1.74472	1.06918	2					1					2
MAZ	54	53.2844	57.3737	16	-0.512509	0.399282	0.125492	0.191138	38	-1.11223	0.404331	0.0118109	0.0381584	28	-1.14056	0.524321	0.00418175	0.0219542
ZNF548	7	1.96506	2.03772	0					1					2
SP2	14	7.32157	1.65108	11	-0.590514	0.450318	0.164561	0.222954	32	-0.6839	0.200085	0.272219	0.3182	26	-0.927866	0.222649	0.274282	0.3182
ZNF121	53	2.48813	21.6024	0					0					1
ZNF383	1	2.22124	1.45933	4	-5.30093	0.703442	0.296558		19	-0.102826	0.00449463	0.98543	0.98543	9	-1.06995	-0.451639	0.222324
HKR1		7.35141	12.4556	0					5	-2.28785	0.314834	0.605865		5	1.56635	-0.243416	0.693161
KLF15	43	0.603694	1.77084	8	-0.511613	0.523227	0.183296		30	-1.33884	0.41391	0.0229774		19	-1.39339	0.375664	0.112964	0.18248
SP3	18	8.76687	5.56334	10	-0.981495	0.652225	0.040968		25	-0.731498	0.507888	0.0095445	0.0364426	23	-1.2472	0.63753	0.00106687	0.0190592
WT1		0.001		14	-1.16863	0.435454	0.119641		34	-1.48818	0.197647	0.262517		23	-1.36756	0.260018	0.230836
ZNF304		2.4524	1.19209	2					4	-3.39485	0.59353	0.40647		7	0.423214	0.734282	0.0602157
ZNF432	4	6.69354	6.25776	14	-0.385714	0.482362	0.0806646	0.141163	32	-1.18687	0.16416	0.369294	0.387759	23	-0.783478	0.249606	0.250718	0.3182
ZNF529	13	3.90548	0.807064	5	-3.27756	0.506861	0.383455		13	-3.75666	0.248568	0.412848	0.422917	11	-3.29314	0.162248	0.633628
ZNF770	41	11.3843	14.5613	10	-0.686187	0.220774	0.539916		17	-0.318306	0.28787	0.262528	0.3182	12	-0.0348717	0.492088	0.104146	0.174965
ZNF880	24	8.04122	6.17317	13	-0.428774	0.417173	0.156122	0.221325	32	-0.746523	0.400634	0.0230693	0.0520473	24	-0.721442	0.450508	0.027159	0.0570339
EGR1	64	30.8737	10.1706	0					7	-0.107663	-0.105269	0.822278		4	-1.75145	-0.571033	0.428967
EGR2	3	19.7351	0.119847	4	1.73741	-0.242063	0.757937		19	-1.03029	0.550595	0.0145694	0.0437081	16	-1.53103	0.505786	0.0456294
FLI1		3.08627	0.00401826	4	-1.20877	-0.116868	0.883132		8	-3.6366	0.588098	0.125185		6	-2.94331	0.835335	0.0384393
KLF3	12	7.37067	5.66754	3	1.03096	0.995752	0.0587025		10	-0.315455	0.576628	0.0809851		6	-0.670083	0.526454	0.283274
KLF6	11	41.0328	1.06609	7	0.00292571	0.593486	0.160091		19	-0.619751	0.629559	0.00387224	0.0219542	14	-1.12171	0.720369	0.00366036	0.0219542
SP4	24	0.720778	6.11215	4	-1.24592	0.739746	0.260254		13	-1.785	0.559449	0.0468173		10	-2.49591	0.688859	0.0275898
ZBTB17	44	8.77212	2.07478	9	-0.759426	0.214922	0.578669		28	-0.843714	0.403282	0.0333378	0.0666756	23	-0.626257	0.575944	0.00402739	0.0219542
ZBTB7A	8	14.2567	1.88087	0					1					1
ZNF281	45	10.0396	3.10843	3	-6.78694	0.867682	0.331218		15	-4.28798	0.50587	0.054367	0.103792	14	-4.31884	0.65581	0.0108772	0.0380703
ZNF444	37	10.2853	2.98879	4	-1.9639	0.169522	0.830478		10	-6.02474	0.461577	0.179316		7	-8.10309	0.817633	0.0246613
ZNF530	6	0.847561	1.8078	0					0					0
ZNF774	1	0.584764	0.63484	5	-1.7873	0.422851	0.478114		12	-0.584842	0.354083	0.258809		10	0.05455	0.222288	0.537068
KLF11	21	2.34298	0.959554	1					4	-6.7964	-0.0386056	0.961394		3	-7.78694	0.681094	0.523009
ZNF212	18	4.00878	2.40158	3	-6.09181	0.617762	0.576079		8	1.76913	-0.141966	0.737369		5	3.73061	-0.223536	0.717773
ZNF93	27	0.916768	10.9909	3	-1.51669	-0.971165	0.153251		3	-3.66429	0.887044	0.305509		3	0.5643	0.112878	0.927986
ZNF468	4	5.49406	0.433876	0					0					0
ZNF235	1	0.893181	1.86626	8	-1.07475	0.443021	0.271624		8	-1.26839	-0.218743	0.602752		4	-1.26717	0.883714	0.116286
ZNF331	30	3.0297	0.769734	0					1					0
ZNF487	0.9		1.52942	2					0					2
ZNF71	17	2.4508	6.49874	2					1					5	-1.32843	0.356261	0.556181
ZNF398	64	2.41532	2.1337	1					1					1
ZNF823	2	1.32018	0.848194	2					0					2
THRB	2	0.0284617	0.0485016	0					0					0
RREB1	6	4.65443	0.611592	0					0					0
PRDM6		0.548291	0.071546	2					5	0.093206	0.75598	0.139283		5	-0.475974	0.763329	0.133198
ZNF287	3	1.98102	3.05008	9	-0.694918	0.111298	0.775593		10	-0.976314	-0.132238	0.715735		7	-1.16417	0.248963	0.590323
ZNF320	5	5.77821	5.62077	0					6	-3.51375	-0.505678	0.306136		5	-3.41239	-0.539011	0.348565
ZSCAN16	7	0.946332	7.12418	0					1					1
RBAK	5	3.41148	5.12814	0					0					0
ZNF785	8	2.69888	2.39278	0					1					1
ZNF816	4	2.13243	0.96674	0					0					0
ZNF768	104	13.0961	17.2603	0					1					0
ZNF182	3	2.14861	0.886703	2					2					1
ZNF225		2.28871	2.12334	1					0					0
ZNF384	40	17.3468	2.69158	4	-1.64502	-0.181989	0.818011		2					1
KLF10	21	22.9578	1.0881	2					6	-1.55327	0.725158	0.102927		4	-4.88918	0.828471	0.171529
KLF5	1	3.37142	0.333155	1					2					2
RXRA	11	9.07224	4.346	0					1					2
ZNF484	3	1.35824	0.946518	2					3	-1.50924	-0.127451	0.918641		3	-1.00308	-0.883742	0.310032
ZNF740	14	6.76153	7.6954	0					0					0
IRF3	81	24.2541	1.35966	3	1.41536	0.624998	0.570199		4	0.752	0.297081	0.702919		4	-0.055525	0.395945	0.604055
ZNF580	17	31.2161	2.99602	0					4	-2.86733	-0.117162	0.882838		3	-4.2517	-0.868338	0.330377
ZNF35	6	2.42699	6.0899	1					0					0
TFAP2A		0.0985039	0.344582	0					0					0
ZNF8	22	2.2726	10.2531	0					0					0
ZNF596		2.12693	0.280122	0					0					0
ZNF780A	3	3.41574	3.47495	2					1					1
ZNF189	4	7.3087	1.27434	0					0					0
ZNF563	1	0.968936	0.495572	0					0					0
ZNF571	2	1.02045	0.819084	3	-5.37656	0.993824	0.0707928		2					1
KLF1	3	0.0257999	0.0156584	1					2					3	-1.68729	0.973844	0.145927
ZNF98		0.00883938		0					0					0
ZIM2		0.0177561		2					5	-0.020622	0.842962	0.0729184		4	-0.634012	0.986593	0.0134072
ZNF146	43	20.8646	9.68829	0					0					0
ZNF260	13	3.87492	3.08596	1					0					0
ZNF879	2	1.20269	2.14693	0					0					0
ZNF132	3	2.47099	0.336718	1					2					2
KLF9	1	4.49767	0.0574897	1					1					0
PAX5		0.001	0.0061772	0					0					0
ZBTB26	12	1.94813	3.38421	1					1					1
ZNF792	6	0.359481	1.98535	0					0					0
ZNF181	1	3.34988	1.48006	0					0					0
ZNF311	5	0.546549	0.293309	0					0					0
ZSCAN30	6	6.36898	1.20848	0					0					0
ASCL1		0.001	2.87717	0					0					0
ZNF765	4	1.71697	2.11432	0					0					0
OSR2		0.77207	0.0247075	0					0					0
ZNF84	8	5.43858	3.00235	0					0					0
FOXG1		0.0731532	24.1695	0					0					0
ZNF549	5	2.70034	1.33615	0					0					0
ZNF436	1	3.64727	2.53041	0					0					0
SOX2	293	0.00192516	57.5172	0					0					0
SOX4	36	6.23717	35.7491	0					0					0
ZNF433	2	1.28507	3.04225	0					0					0
ZNF454	1	0.704616	0.724613	0					0					0
ZNF492		0.149996	0.00358981	0					0					0
ZNF519	8	0.27701	2.0678	1					0					0
ZNF267	3	1.81192	1.33421	1					1					1
PPARD	35	28.0914	4.48749	0					0					0
RARG	99	39.5448	0.326368	0					0					0
ZNF28	11	2.90137	1.19575	0					1					0
ZNF626	4	3.53888	2.38567	0					0					0
KLF14		0.00545074	0.0213875	0					1					0
ZNF567	5	2.18	2.31927	0					0					0
ZNF33A	10	3.95965	12.3927	0					0					0
SREBF2	246	27.116	9.25568	0					0					0
TFAP2C	6	0.209552	14.3441	0					1					1
KLF12	6	8.38955	5.51235	0					0					1
PTF1A		0.001		0					0					0
ZNF662		1.56175	0.163372	1					0					0
SALL4	215	0.779263	10.5805	0					0					0
NR2F1		13.7918	27.8458	0					0					0
ZNF394	8	4.97722	5.39538	0					0					1
REST	18	5.49624	10.9811	0					0					0
ZNF675	4	1.26627	10.5373	0					0					0
ZFP1	6	2.64642	7.44048	0					0					0
ZNF3	23	8.88537	2.5328	0					0					0
ETV4	106	0.732124	0.468416	0					1					0
ETV5	19	23.1005	3.13728	0					1					0
ZNF322	1		0.567984	0					0					0
ZNF224	2	0.943105	4.05998	0					0					0
ZNF134	27	6.11704	11.5139	0					0					0
ZNF682	3	1.34055	2.49913	0					0					0
ZNF429	5	0.790097	6.93123	0					0					0
ZNF141	6	0.936381	12.7111	0					0					0
ZNF566	4	2.01458	0.431698	0					0					0
ZNF443	1	0.551135	3.21132	0					0					0
MECOM		1.12761	5.16728	0					0					0
ZNF24	24	8.51918	19.2039	0					0					0
ZNF496	40	3.88515	8.97016	0					1					0
ZNF76	20	10.4356	3.7579	1					0					1
ZKSCAN3	7	1.81244	0.672105	0					0					0
ZNF30	5	1.31695	0.464896	0					0					0
ZNF140	5	5.00532	0.950587	0					0					0
ESRRA	29	11.3171	2.24601	0					0					0
NR5A2	3	0.00648127	0.0073528	0					0					0
ZNF300	13	3.63237	3.67173	0					0					0
ZSCAN31	3		0.283697	0					0					1
ZNF449	5	4.0683	2.31351	0					0					0
EHF		0.0113907	0.0182572	0					0					0
ELF1	7	11.9956	1.24833	0					0					0
ELF2	13	5.61197	2.05385	0					0					0
ELF3	10	0.0124291	0.0891122	0					0					0
ELF4	6	11.5441	0.236295	0					0					0
ZNF543	4	0.628588	4.30512	0					1					1
KLF7	13	8.56932	0.703883	0					1					1
ERG	0.7	0.621214	0.0332486	0					0					0
ZNF513	59	13.7535	2.60343	0					0					0
ZNF586	12	1.42628	1.50764	1					1					1
ZNF285	0.5	0.976342	0.509296	0					0					0
ZNF329	11	4.26234	5.42001	0					0					0
ZNF264	6	1.6002	2.65333	0					0					0
ZNF274	9	9.84875	1.67647	0					0					0
ZNF419	3	8.01152	0.432737	0					0					0
ZKSCAN1	16	9.96044	5.72144	0					0					0
ZNF787	25	10.3096	6.93425	0					0					0
PLAG1	7	1.09906	0.795823	0					0					0
NR1H4		0.001		0					0					0
ZNF17	3	1.79903	3.65965	0					0					0
E2F6	4	5.84311	0.402165	0					0					0
ZFP82	5	2.83442	4.09483	0					0					0
NHLH2	2	0.00934498	0.624993	0					0					0
TBX3		3.06964	0.108351	0					0					0
ZNF680		1.58466	4.07363	0					0					0
THAP1	12	4.15565	1.60845	0					0					0
ZNF100	9	0.632049	3.01915	0					0					0
ZNF250	6	0.898159	1.4936	0					0					0
YY1	47	24.067	19.6964	0					0					0
PAX4	0.5	0.001		0					0					0
PAX6		0.0690852	5.21215	0					0					0
ETS2	24	1.64087	0.732319	0					0					0
ZNF565	1	2.02396	0.602573	0					0					0
STAT1	36	304.377	4.65127	0					0					0
MEF2A	20	29.7524	4.52004	0					0					0
VDR	0.6	23.6325	0.0156411	0					0					0
FOXP1	0.8	9.11446	0.859835	0					0					0
ZNF354A	5	5.63144	4.85741	0					0					0
ZFP14	4	0.746544	1.32131	0					0					0
ZNF660	6	0.404321	8.30935	0					0					0
ZNF582	4	1.00141	1.17432	0					1					0
ZIC1	0.5	0.125168	42.5848	0					0					0
PRDM1		0.679982	0.0292925	0					0					0
ZNF16	7	3.05626	1.27432	0					0					0
SOX21	17	0.00867864	5.04396	0					0					0
SOX7	0.7	0.109185	0.0745408	0					0					0
ZNF382	1	1.44032	2.36478	0					0					0
RARA	6	14.2699	4.14406	0					0					0
RFX1	14	3.8194	1.87474	0					0					0
RFX2	3	1.97346	2.21469	0					0					0
RFX3	5	0.641764	3.09265	0					0					0
RFX4		0.023904	2.2926	0					0					0
ZNF136	2	2.1726	3.27158	0					0					0
NFATC1	2	4.09704	0.117126	0					0					0

## Sheet: supplementary file 3c
Supplementary Table 3. Enriched transcription factors
TF	ESC expression (FPKM)	Osteoblast expression (FPKM)	NPC expression (FPKM)	active vs all ratio ESC	active vs all P-value ESC	active vs all FDR ESC	differentially active vs active ratio ESC	differentially active vs active P-value ESC	differentially active vs active FDR ESC	active vs all ratio osteoblast	active vs all P-value osteoblast	active vs all FDR osteoblast	differentially active vs active ratio osteoblast	differentially active vs active P-value osteoblast	differentially active vs active FDR osteoblast	active vs all ratio NPC	active vs all P-value NPC	active vs all FDR NPC	differentially active vs active ratio NPC	differentially active vs active P-value NPC	differentially active vs active FDR NPC
PATZ1	98	2.72217	3.12733	1.67822	7.90317e-07	8.79227e-06	1.00909	1	1	1.85218	2.67499e-07	3.9679e-06	1.36201	0.165814	0.414536	2.0598	5.48542e-08	1.39486e-06	1.63663	0.0601423	0.225534
PRDM9		0.001		1.57973	6.10389e-05		1.36354	0.302385		1.76642	1.2155e-05		1.57974	0.0598813		1.94174	4.17548e-06		1.43471	0.190061
SP1	71	14.0485	5.05692	2.14381	5.07825e-07	6.69467e-06	2.48645	0.00833938	0.156348	2.96797	1.62227e-11	7.21912e-10	1.35802	0.308252	0.49082	3.36886	6.53491e-12	3.87738e-10	1.89332	0.0458849	0.21735
VEZF1	35	8.65855	16.8099	1.3138	0.0128521	0.031338	1.8844	0.0380911	0.214262	1.59537	0.000154205	0.000703805	1.65577	0.0374657	0.214262	1.78151	2.73239e-05	0.000138961	1.37748	0.256157	0.479001
ZNF263	8	8.61986	6.57285	1.33876	0.00700183	0.0175539	1.6782	0.0890418	0.276337	1.55968	0.000305541	0.0012486	1.8191	0.0104232	0.156348	1.90005	1.68882e-06	1.58216e-05	1.38426	0.219106	0.448654
ZNF467	0.8	0.00345459	1.233	1.39151	0.000977679		1.51364	0.125388		1.52137	0.000263307		1.47551	0.0862722		1.77524	5.31008e-06	3.78078e-05	1.25083	0.363283	0.55416
ZNF341	10	1.72142	0.191129	1.62479	1.40734e-05	8.08087e-05	1.52415	0.176262	0.417462	1.82318	2.52576e-06	2.14088e-05	1.39003	0.176103	0.417462	2.18244	1.46209e-08		1.19559	0.490088
CTCF	27	9.86267	26.7677	1.0943	0.689897	0.78719	1.30061	0.668131	0.841895	0.63744	0.338185	0.473992	0.938272			0.491546	0.197612	0.305869	0.978214
ZNF180	2	1.69701	0.438254	1.73279	0.000126765	0.000593796	1.54019	0.276756	0.479001	2.31717	7.52893e-08	1.48905e-06	1.79375	0.041458	0.214488	2.70408	4.24397e-09		1.55363	0.186962
ZNF283	2	1.74472	1.06918	2.05491	0.0412515	0.0843997	2.43864	0.240039	0.471412	3.45682	0.000933348	0.00339053	0.234568	0.189162	0.433398	3.25877	0.00547726	0.014772	0.978214
MAZ	54	53.2844	57.3737	1.5714	1.22884e-05	7.54253e-05	1.36906	0.271955	0.479001	1.73029	3.55745e-06	2.75315e-05	1.46124	0.10595	0.313787	1.98253	1.5123e-07	2.69189e-06	1.46732	0.145431	0.373964
ZNF548	7	1.96506	2.03772	0.971413	1	1	0			1.74841	0.17296	0.279881	0.469136			0.74565	1	1	Inf
SP2	14	7.32157	1.65108	1.90068	1.3248e-06	1.36537e-05	1.51127	0.240944	0.471412	2.75734	3.44723e-13	3.06803e-11	1.56379	0.0749749	0.242845	3.34833	8.49613e-16	1.51231e-13	1.65871	0.0656016	0.229929
ZNF121	53	2.48813	21.6024	2.00354	0.135608	0.232133	0			1.37375	0.487983	0.638683	0			2.58784	0.0824745	0.154531	0.978214
ZNF383	1	2.22124	1.45933	2.04988	3.49228e-05		0.9074	1		2.60758	5.9978e-07	7.11738e-06	2.02581	0.0359262	0.214262	2.69691	4.27243e-06	3.16872e-05	1.14834	0.68287	0.841895
HKR1		7.35141	12.4556	1.31331	0.251879		0	0.252998		1.38612	0.224945	0.333668	1.06622	1	1	1.77393	0.0529808	0.103633	1.46732	0.54931	0.772467
KLF15	43	0.603694	1.77084	1.42474	0.00727896	0.0179952	1.18237	0.6796	0.841895	2.03564	5.69849e-07		1.71635	0.0436292		2.31544	7.48685e-08	1.48905e-06	1.35996	0.284117	0.480838
SP3	18	8.76687	5.56334	2.12423	5.26547e-07	6.69467e-06	1.74188	0.130017	0.344164	2.77301	2.41036e-10	7.15072e-09	1.72476	0.0566256	0.221579	3.14238	8.92867e-11	3.17861e-09	2.49988	0.00264226	0.0939177
WT1		0.001		1.63485	3.94854e-05		1.64535	0.107586		2.07438	2.3049e-08		1.59506	0.0480684		2.32242	6.12226e-09		1.4361	0.196443
ZNF304		2.4524	1.19209	2.05491	0.0150146		1.5007	0.643754		2.80474	0.00124412	0.00442907	0.938272	1	1	3.21903	0.000841064	0.00318531	4.1085	0.0170032	0.1791
ZNF432	4	6.69354	6.25776	1.37559	0.00186156	0.00581329	1.2303	0.519509	0.754126	1.44976	0.00193015	0.00592356	1.27223	0.336366	0.521947	1.47643	0.00394896	0.0111574	1.46732	0.192621	0.433398
ZNF529	13	3.90548	0.807064	1.65606	0.00423565	0.0115992	1.31818	0.586012	0.811402	2.40699	3.01843e-06	2.44219e-05	1.08907	0.861511	0.945561	2.67103	2.32885e-06		1.40352	0.419758
ZNF770	41	11.3843	14.5613	1.63388	0.00282794	0.00838955	2.43864	0.0237893	0.1791	1.94988	0.000245567	0.00104074	1.66152	0.120335	0.328186	2.10403	0.000214686	0.00093205	1.67694	0.219342	0.448654
ZNF880	24	8.04122	6.17317	1.30741	0.014894	0.0348833	1.39351	0.295338	0.48328	1.44536	0.00385246	0.0110603	1.59706	0.0560062	0.221579	1.6065	0.000884284	0.00327922	1.71784	0.0543148	0.221579
EGR1	64	30.8737	10.1706	3.05301	0.00179624	0.00570949	0	0.616413	0.815841	4.00677	0.000322119	0.00127416	4.10494	0.0222647	0.1791	3.74412	0.00258521	0.00779944	2.93464
EGR2	3	19.7351	0.119847	1.74782	0.00150224	0.00504526	0.975455	1	1	2.61182	2.07675e-07	3.36055e-06	1.78272	0.0664239	0.229929	2.67103	2.32885e-06		2.60857	0.00867541
FLI1		3.08627	0.00401826	0.950832	0.910573		2.29519	0.129644		1.42614	0.139705	0.234599	1.44349	0.470688	0.694457	1.46036	0.16294		1.76078	0.260625
KLF3	12	7.37067	5.66754	2.85951	0.000204857	0.000911615	1.82898	0.412815	0.619223	4.22936	1.38071e-06	1.36537e-05	2.60631	0.0428976	0.214488	4.69262	2.1673e-06	1.9289e-05	1.76078	0.260625	0.479001
KLF6	11	41.0328	1.06609	1.75653	0.000834519	0.00318531	1.66541	0.210238	0.448654	2.25129	8.97054e-06	6.14137e-05	2.13244	0.0243828	0.1791	2.43611	1.32983e-05	7.89032e-05	2.31682	0.02587	0.1791
SP4	24	0.720778	6.11215	2.30241	1.68453e-05	9.3702e-05	1.11481	0.779049	0.885872	2.81326	1.15781e-06		1.52469	0.25002		2.8057	1.79435e-05	9.39394e-05	1.95643	0.108082	0.313787
ZBTB17	44	8.77212	2.07478	1.52372	0.00136672	0.0047403	1.27233	0.546218	0.772467	1.82515	3.45e-05	0.000165973	1.82442	0.0245766	0.1791	2.0346	1.15194e-05	7.32307e-05	2.24989	0.00887906	0.156348
ZBTB7A	8	14.2567	1.88087	10.6855			0			16.0271			Inf			21.9967			Inf
ZNF281	45	10.0396	3.10843	1.88952	0.00288426	0.00841636	1.12552	0.747079	0.873209	2.37087	0.000308642	0.0012486	3.51852	0.00313059	0.0939177	2.95862	1.77516e-05	9.39394e-05	4.565	0.000465492	0.0418942
ZNF444	37	10.2853	2.98879	1.73749	0.0339177	0.0745351	2.43864	0.11307	0.31801	2.14535	0.00657987	0.0169742	3.35097	0.0153557	0.1791	2.55775	0.00173298	0.00560856	2.56781	0.0755519	0.242845
ZNF530	6	0.847561	1.8078	3.56185			0			5.34235			0			7.33223			0
ZNF774	1	0.584764	0.63484	1.57575	0.0221908		1.8064	0.218331		1.94924	0.00260262		1.87654	0.13468		2.13184	0.00255884		2.44553	0.0468091
KLF11	21	2.34298	0.959554	1.85836	0.135628	0.232133	1.39351			3.20541	0.00408568	0.0113633	1.87654			3.82551	0.00229651		1.76078
ZNF212	18	4.00878	2.40158	1.49681	0.0346041	0.0751163	0.886777	1	1	1.11137	0.616013	0.726161	1.70595	0.310853	0.49082	1.43978	0.147101	0.242444	1.12871	0.787441	0.885872
ZNF93	27	0.916768	10.9909	1.39734	0.184094	0.292578	2.09026	0.210418	0.448654	1.54335	0.156321		0.703704	0.764687		2.1182	0.0147575	0.0348833	0.880392	1	1
ZNF468	4	5.49406	0.433876	1.33569			0			2.00338			0			2.74958			0
ZNF235	1	0.893181	1.86626	1.26158	0.0368214		0.848221	0.856665		0.505751	0.000116814		0.893592	1		0.893389	0.563609	0.698245	0.355714	0.0487973	0.219588
ZNF331	30	3.0297	0.769734	0	0.615071	0.726161				6.01015	0.0235304	0.0530179	1.17284			2.19967	0.387162		0
ZNF487	0.9		1.52942	1.31426	0.214519		0.929004	1		0.552657	0.13718		0			0.536504	0.227402	0.334525	1.95643
ZNF71	17	2.4508	6.49874	2.67139	0.00161755	0.00533191	1.5007	0.643754	0.827683	2.18551	0.0422961	0.0847063	0.29321			2.26436	0.0453509	0.0896939	7.3366
ZNF398	64	2.41532	2.1337	1.29522	0.528279	0.676502	1.39351			0.445196	0.325348	0.463295	2.34568			1.25695	0.564872	0.698245	0.978214
ZNF823	2	1.32018	0.848194	1.30601	0.372632	0.514174	2.16768	0.276137	0.479001	0.323779	0.130956	0.230793	0			1.14566	0.628296		1.95643
THRB	2	0.0284617	0.0485016	0						0						0
RREB1	6	4.65443	0.611592	1.06855	0.758398	0.839426	0			0.500846	1	1	0			1.41914	0.653979		0
PRDM6		0.548291	0.071546	0.687374	0.104455		0.975455	1		0.641082	0.112022		1.30316	0.769058		0.749887	0.431498		2.09617	0.198164
ZNF287	3	1.98102	3.05008	1.12413	0.30614	0.43946	1.09739	0.709268	0.862623	0.623275	0.00563272	0.0149645	0.938272	1	1	0.779506	0.210189	0.322531	0.821699	0.834849	0.92761
ZNF320	5	5.77821	5.62077	1.72348	0.133785	0.232133	0	0.612211	0.815841	1.97256	0.0766801	0.145203	7.03704			2.70728	0.0142789	0.0343465	4.89107
ZSCAN16	7	0.946332	7.12418	1.05893	0.870262	0.950348	0	0.612731	0.815841	0.684917	0.559449		0.58642			0.366611	0.17929	0.287509	2.93464
RBAK	5	3.41148	5.12814	5.34277			0			3.20541			0			0
ZNF785	8	2.69888	2.39278	1.26778	0.507347	0.659181	0			1.90152	0.110729	0.203193	0.390947			1.80301	0.212712	0.323613	0.73366
ZNF816	4	2.13243	0.96674	0						0						0
ZNF768	104	13.0961	17.2603	0.562397	1	1	0			1.78078	0.330503	0.466901	2.34568			1.15772	0.589339	0.718509	0
ZNF182	3	2.14861	0.886703	1.17855	0.557175	0.698245	1.5007	0.643754	0.827683	0.548872	0.222082	0.33219	1.56379			0.445879	0.22254		1.46732
ZNF225		2.28871	2.12334	0.736934	0.578617		1.95091			0	0.00647609	0.0169521				0	0.0351504	0.0753827
ZNF384	40	17.3468	2.69158	1.07322	0.732997	0.821696	2.05359	0.265109	0.479001	0.457916	0.0400394	0.0828722	0.938272			0.536504	0.157002	0.256388	0.586928
KLF10	21	22.9578	1.0881	2.78753	0.0338219	0.0745351	4.87727			7.21218	2.94255e-05	0.000145493	4.69136			5.73826	0.00138481	0.0047403	5.86928
KLF5	1	3.37142	0.333155	1.06855	0.758398		4.87727			2.86198	0.0423532	0.0847063	1.56379			3.92798	0.0135438		1.95643
RXRA	11	9.07224	4.346	1.78092	0.191884	0.299608	0			1.04524	0.763972	0.839426	1.17284			3.0693	0.0193827	0.0448067	1.46732
ZNF484	3	1.35824	0.946518	1.21427	0.608438	0.726161	6.50303			1.42463	0.533204	0.67793	7.03704			1.95526	0.16439		8.80392
ZNF740	14	6.76153	7.6954	0						0						0
IRF3	81	24.2541	1.35966	1.55951	0.0359912	0.076267	1.21932	0.734042	0.86926	0.961624	1	1	1.17284	0.758539	0.875237	1.08894	0.733987	0.821696	1.95643	0.288503	0.480838
ZNF580	17	31.2161	2.99602	0.201614	0.0863063	0.160026	0			2.38701	0.0384054	0.0804254	3.12757			1.75973	0.298134	0.431446	8.80392
ZNF35	6	2.42699	6.0899	2.03534	0.0724573	0.138682	1.39351			0.667794	1	1	0			0.448912	0.725282	0.821696	0
TFAP2A		0.0985039	0.344582	1.78092			0			0						0
ZNF8	22	2.2726	10.2531	0						0						0
ZNF596		2.12693	0.280122	1.28227	0.72943		0			1.23285	0.679129	0.779902	0			1.69205	0.346073		0
ZNF780A	3	3.41574	3.47495	1.21427	0.608438	0.726161	6.50303			1.04524	0.763972	0.839426	1.17284			1.43457	0.472722	0.627944	1.46732
ZNF189	4	7.3087	1.27434	0						0						0
ZNF563	1	0.968936	0.495572	1.78092			0			0						0
ZNF571	2	1.02045	0.819084	9.61699	1.0531e-05	6.94269e-05	4.87727			4.27388	0.0228297	0.0520987	2.34568			4.12438	0.0476217		1.46732
KLF1	3	0.0257999	0.0156584	2.37457	0.114013	0.204993	3.25152			5.65661	0.00176667		1.17284			7.76353	0.000368992		2.93464
ZNF98		0.00883938		1.52651			0			0						0
ZIM2		0.0177561		5.12906	3.85776e-05		1.95091	0.31209		3.73965	0.00531171		5.8642			4.25742	0.00502378		5.86928
ZNF146	43	20.8646	9.68829	0						0						0
ZNF260	13	3.87492	3.08596	1.33569			Inf			0						0
ZNF879	2	1.20269	2.14693	0.821965	1	1	0			0	1	1				0	1	1
ZNF132	3	2.47099	0.336718	1.47779	0.221233	0.33219	0.812879	1	1	1.65227	0.14401	0.239568	0.58642	0.731565	0.86926	1.77751	0.145178		0.978214
KLF9	1	4.49767	0.0574897	7.1237			9.75455			10.6847			2.34568			14.6645			0
PAX5		0.001	0.0061772	0						0						0
ZBTB26	12	1.94813	3.38421	1.33569	0.588009	0.718509	2.43864			2.00338	0.18824	0.29652	0.58642			1.57119	0.446558	0.602177	1.46732
ZNF792	6	0.359481	1.98535	5.34277	0.00668395	0.0169963	0			1.14479	0.596867		0			3.3841	0.137079	0.232381	0
ZNF181	1	3.34988	1.48006	3.56185			0			0						0
ZNF311	5	0.546549	0.293309	2.24959	0.129135	0.22986	0			2.40406	0.15044		0			4.63088	0.0164931		0
ZSCAN30	6	6.36898	1.20848	0	0.615071	0.726161				1.60271	0.486407	0.638683	0			0	1	1
ASCL1		0.001	2.87717	0						0						0
ZNF765	4	1.71697	2.11432	2.67139			0			0						0
OSR2		0.77207	0.0247075	0						4.00677			0			5.49917			0
ZNF84	8	5.43858	3.00235	0						0						0
FOXG1		0.0731532	24.1695	0	0.260812					0	0.397848					0	0.624287	0.726294
ZNF549	5	2.70034	1.33615	Inf			0			0						0
ZNF436	1	3.64727	2.53041	0	0.25291					0	0.637137	0.736431				0	0.623628	0.726294
SOX2	293	0.00192516	57.5172	0						0						0
SOX4	36	6.23717	35.7491	0						0						0
ZNF433	2	1.28507	3.04225	0						0						0
ZNF454	1	0.704616	0.724613	0						0						0
ZNF492		0.149996	0.00358981	0						0						0
ZNF519	8	0.27701	2.0678	17.8092			2.43864			2.28958			0			0
ZNF267	3	1.81192	1.33421	3.05301	0.062409	0.120748	3.25152			0.942768	1	1	Inf			1.29392	0.551141	0.695767	Inf
PPARD	35	28.0914	4.48749	0						0						0
RARG	99	39.5448	0.326368	0						0						0
ZNF28	11	2.90137	1.19575	21.3711			0			8.01353			Inf			10.9983			0
ZNF626	4	3.53888	2.38567	0						0						0
KLF14		0.00545074	0.0213875	Inf			0			Inf			Inf			Inf			0
ZNF567	5	2.18	2.31927	0						5.34235			0			7.33223			0
ZNF33A	10	3.95965	12.3927	0						0						0
SREBF2	246	27.116	9.25568	0						6.41082			0			0
TFAP2C	6	0.209552	14.3441	1.06855	1	1	0			1.60271	0.486407		Inf			2.19967	0.387162	0.530115	Inf
KLF12	6	8.38955	5.51235	10.6855			0			16.0271			0			21.9967			Inf
PTF1A		0.001		1.52651			0			0						0
ZNF662		1.56175	0.163372	5.34277			Inf			8.01353			0			10.9983			0
SALL4	215	0.779263	10.5805	0						0						0
NR2F1		13.7918	27.8458	1.78092			0			0						0
ZNF394	8	4.97722	5.39538	2.13711	0.274669	0.400746	0			1.45701	0.516582	0.666315	0			1.9997	0.413833	0.562307	Inf
REST	18	5.49624	10.9811	0						0						0
ZNF675	4	1.26627	10.5373	0						0						0
ZFP1	6	2.64642	7.44048	0						0						0
ZNF3	23	8.88537	2.5328	0						0						0
ETV4	106	0.732124	0.468416	0						Inf			Inf			0
ETV5	19	23.1005	3.13728	0	1	1				4.00677	0.113707	0.204993	2.34568			2.44408	0.359277	0.499619	0
ZNF322	1		0.567984	0						0						0
ZNF224	2	0.943105	4.05998	10.6855			0			0						0
ZNF134	27	6.11704	11.5139	0						0						0
ZNF682	3	1.34055	2.49913	0						0						0
ZNF429	5	0.790097	6.93123	0						0						0
ZNF141	6	0.936381	12.7111	1.52651			0			2.28958			0			3.14238			0
ZNF566	4	2.01458	0.431698	0						16.0271			0			21.9967			0
ZNF443	1	0.551135	3.21132	0						0						0
MECOM		1.12761	5.16728	0						0						0
ZNF24	24	8.51918	19.2039	10.6855			0			0						0
ZNF496	40	3.88515	8.97016	0	1	1				1.78078	0.454347	0.608074	Inf			0	1	1
ZNF76	20	10.4356	3.7579	7.1237			9.75455			4.00677			0			14.6645			2.93464
ZKSCAN3	7	1.81244	0.672105	0						0						0
ZNF30	5	1.31695	0.464896	3.56185			0			0						0
ZNF140	5	5.00532	0.950587	0						0						0
ESRRA	29	11.3171	2.24601	0						0						0
NR5A2	3	0.00648127	0.0073528	0						0						0
ZNF300	13	3.63237	3.67173	0						0						0
ZSCAN31	3		0.283697	0						0						Inf			Inf
ZNF449	5	4.0683	2.31351	0						0						0
EHF		0.0113907	0.0182572	0						0						0
ELF1	7	11.9956	1.24833	0						0						0
ELF2	13	5.61197	2.05385	0						0						0
ELF3	10	0.0124291	0.0891122	0						0						0
ELF4	6	11.5441	0.236295	0						0						0
ZNF543	4	0.628588	4.30512	0						Inf			Inf			Inf			Inf
KLF7	13	8.56932	0.703883	0						Inf			Inf			Inf			Inf
ERG	0.7	0.621214	0.0332486	0						0						0
ZNF513	59	13.7535	2.60343	10.6855			0			0						0
ZNF586	12	1.42628	1.50764	10.6855			Inf			16.0271			Inf			21.9967			Inf
ZNF285	0.5	0.976342	0.509296	0						0						0
ZNF329	11	4.26234	5.42001	0						0						0
ZNF264	6	1.6002	2.65333	3.56185			0			0						0
ZNF274	9	9.84875	1.67647	0						0						0
ZNF419	3	8.01152	0.432737	0						0						0
ZKSCAN1	16	9.96044	5.72144	0						0						0
ZNF787	25	10.3096	6.93425	0						0						0
PLAG1	7	1.09906	0.795823	0						0						0
NR1H4		0.001		0						0						0
ZNF17	3	1.79903	3.65965	0						0						Inf			0
E2F6	4	5.84311	0.402165	0						0						0
ZFP82	5	2.83442	4.09483	0						0						0
NHLH2	2	0.00934498	0.624993	0						0						0
TBX3		3.06964	0.108351	0						0						0
ZNF680		1.58466	4.07363	0						Inf			0			0
THAP1	12	4.15565	1.60845	5.34277			0			8.01353			0			10.9983			0
ZNF100	9	0.632049	3.01915	Inf			0			0						0
ZNF250	6	0.898159	1.4936	0						0						0
YY1	47	24.067	19.6964	0						0						0
PAX4	0.5	0.001		0						0						0
PAX6		0.0690852	5.21215	0						0						0
ETS2	24	1.64087	0.732319	0						0						0
ZNF565	1	2.02396	0.602573	0						0						0
STAT1	36	304.377	4.65127	0						0						0
MEF2A	20	29.7524	4.52004	0						0						0
VDR	0.6	23.6325	0.0156411	0						0						0
FOXP1	0.8	9.11446	0.859835	0						0						0
ZNF354A	5	5.63144	4.85741	0						0						0
ZFP14	4	0.746544	1.32131	0						0						0
ZNF660	6	0.404321	8.30935	0						0						Inf			0
ZNF582	4	1.00141	1.17432	5.34277			0			8.01353			Inf			10.9983			0
ZIC1	0.5	0.125168	42.5848	Inf			0			0						0
PRDM1		0.679982	0.0292925	0						0						0
ZNF16	7	3.05626	1.27432	0						0						0
SOX21	17	0.00867864	5.04396	0						0						0
SOX7	0.7	0.109185	0.0745408	0						0						0
ZNF382	1	1.44032	2.36478	0						Inf			0			Inf			0
RARA	6	14.2699	4.14406	0						0						0
RFX1	14	3.8194	1.87474	Inf			0			Inf			0			Inf			0
RFX2	3	1.97346	2.21469	Inf			0			Inf			0			Inf			0
RFX3	5	0.641764	3.09265	Inf			0			Inf			0			Inf			0
RFX4		0.023904	2.2926	Inf			0			Inf			0			Inf			0
ZNF136	2	2.1726	3.27158	0						0						0
NFATC1	2	4.09704	0.117126	0						0						0
