# Supplementary material for: The cis-regulatory effects of modern human-specific variants
Source: eLife. 2021 Apr 22;10:e63713. doi: 10.7554/eLife.63713 (PMC8062137; doi:10.7554/eLife.63713)
Supplement: Supplementary file 6. [file elife-63713-supp6.xls]

## Sheet: supplementary file 6a
Supplementary Table 6. Gene Ontology terms enriched within genes associated with modern human-derived fixed variants.
Term	Enrichment	Observed	Expected	P-value	FDR
GO:0042472~inner ear morphogenesis	3.94344	11	2.78944	1.62672e-05	0.00204967
GO:0007157~heterophilic cell-cell adhesion via plasma membrane cell adhesion molecules	4.10118	11	2.68215	1.09028e-05	0.00204967
GO:0048706~embryonic skeletal system development	4.97113	8	1.60929	3.38144e-05	0.00284041
GO:0051965~positive regulation of synapse assembly	3.3074	11	3.32587	9.15391e-05	0.00463485
GO:0030534~adult behavior	5.01893	7	1.39472	9.19612e-05	0.00463485
GO:0060021~palate development	2.94343	12	4.07687	0.000150713	0.00632993
GO:0007399~nervous system development	1.81871	28	15.3956	0.000203085	0.00731106
GO:0007626~locomotory behavior	2.6631	12	4.50602	0.00039625	0.0124819
GO:0000122~negative regulation of transcription from RNA polymerase II promoter	1.39813	54	38.623	0.000553936	0.0155102
GO:0007268~chemical synaptic transmission	1.7865	23	12.8743	0.0008749	0.0220475
GO:0034332~adherens junction organization	3.52681	7	1.98479	0.000963711	0.0220777
GO:0001657~ureteric bud development	3.434	7	2.03844	0.00113901	0.0220792
GO:0030522~intracellular receptor signaling pathway	3.434	7	2.03844	0.00113901	0.0220792
GO:0001822~kidney development	2.38441	11	4.61331	0.00168031	0.0264648
GO:0007613~memory	2.70606	9	3.32587	0.00163398	0.0264648
GO:0001654~eye development	3.72835	6	1.60929	0.00151587	0.0264648
GO:0007507~heart development	1.83361	18	9.81669	0.00212348	0.0314774
GO:0006366~transcription from RNA polymerase II promoter	1.41721	39	27.5189	0.00230466	0.0322652
GO:0071363~cellular response to growth factor stimulus	2.89982	7	2.41394	0.00317283	0.0349056
GO:0051056~regulation of small GTPase mediated signal transduction	1.94764	14	7.18817	0.00339027	0.0349056
GO:0008584~male gonad development	2.18148	11	5.04245	0.00344186	0.0349056
GO:0030336~negative regulation of cell migration	2.15852	11	5.09609	0.00373989	0.0349056
GO:0030182~neuron differentiation	2.15852	11	5.09609	0.00373989	0.0349056
GO:0007612~learning	2.61638	8	3.05766	0.00344789	0.0349056
GO:0030514~negative regulation of BMP signaling pathway	2.89982	7	2.41394	0.00317283	0.0349056
GO:0030501~positive regulation of bone mineralization	3.19573	6	1.87751	0.00348092	0.0349056
GO:0050680~negative regulation of epithelial cell proliferation	2.6631	8	3.00401	0.00307776	0.0349056
GO:0034220~ion transmembrane transport	1.68663	19	11.265	0.00424568	0.0360464
GO:0045893~positive regulation of transcription, DNA-templated	1.37551	38	27.6262	0.00427969	0.0360464
GO:0043406~positive regulation of MAP kinase activity	2.52769	8	3.16494	0.00429124	0.0360464
GO:0045669~positive regulation of osteoblast differentiation	2.48556	8	3.21859	0.0047685	0.0387633
GO:0010811~positive regulation of cell-substrate adhesion	2.94343	6	2.03844	0.00533236	0.0419923
GO:0002062~chondrocyte differentiation	2.86796	6	2.09208	0.00608594	0.0431377
GO:0072659~protein localization to plasma membrane	2.3672	8	3.37951	0.00644742	0.0431377
GO:0007156~homophilic cell adhesion via plasma membrane adhesion molecules	1.76978	15	8.47561	0.00627834	0.0431377
GO:0010628~positive regulation of gene expression	1.56534	22	14.0545	0.00567482	0.0431377
GO:0007218~neuropeptide signaling pathway	2.03029	11	5.41795	0.00598887	0.0431377
GO:0019722~calcium-mediated signaling	2.55867	7	2.7358	0.00650489	0.0431377
GO:0007605~sensory perception of sound	1.82212	13	7.13453	0.00792923	0.0499541
GO:0048839~inner ear development	2.72806	6	2.19937	0.00782248	0.0499541
GO:0009653~anatomical structure morphogenesis	2.02627	10	4.93516	0.00838475	0.0515356
GO:0001541~ovarian follicle development	2.6631	6	2.25301	0.0088136	0.0528816
GO:0035264~multicellular organism growth	2.09719	9	4.29145	0.00932447	0.0546457
GO:0042475~odontogenesis of dentin-containing tooth	2.37258	7	2.95037	0.0098565	0.0564509
GO:0021987~cerebral cortex development	2.33022	7	3.00401	0.0108621	0.0608278
GO:0008285~negative regulation of cell proliferation	1.36518	29	21.2427	0.0120667	0.0660719
GO:0045892~negative regulation of transcription, DNA-templated	1.30754	35	26.7679	0.0123229	0.0660719
GO:0007420~brain development	1.56983	16	10.1922	0.0150105	0.0748906
GO:0005975~carbohydrate metabolic process	1.60705	15	9.3339	0.0146415	0.0748906
GO:0007411~axon guidance	1.64141	14	8.52925	0.0148467	0.0748906
GO:0043647~inositol phosphate metabolic process	2.3798	6	2.52123	0.0151564	0.0748906
GO:0016266~O-glycan processing	2.17487	7	3.21859	0.0156403	0.0757951
GO:0035176~social behavior	2.33022	6	2.57487	0.0167289	0.0795413
GO:0045944~positive regulation of transcription from RNA polymerase II promoter	1.15917	61	52.6239	0.0178544	0.0833205
GO:0006139~nucleobase-containing compound metabolic process	2.28266	6	2.62851	0.0184111	0.0843561
GO:0001649~osteoblast differentiation	1.79247	10	5.57888	0.0189624	0.0853308
GO:0001764~neuron migration	1.7754	10	5.63252	0.0201547	0.0891048
GO:0008284~positive regulation of cell proliferation	1.28012	32	24.9977	0.0208584	0.0906263
GO:0007269~neurotransmitter secretion	2.19314	6	2.7358	0.0221174	0.0928929
GO:0007519~skeletal muscle tissue development	2.19314	6	2.7358	0.0221174	0.0928929
GO:0030335~positive regulation of cell migration	1.51971	15	9.87033	0.0231618	0.0940562
GO:0046330~positive regulation of JNK cascade	2.00757	7	3.4868	0.0235141	0.0940562
GO:1902476~chloride transmembrane transport	1.80404	9	4.98881	0.0234712	0.0940562
GO:0002244~hematopoietic progenitor cell differentiation	1.97715	7	3.54044	0.0253672	0.0998835
GO:0071456~cellular response to hypoxia	1.74766	9	5.14974	0.0282051	0.106085
GO:0007155~cell adhesion	1.25903	31	24.6222	0.0275518	0.106085
GO:0007169~transmembrane receptor protein tyrosine kinase signaling pathway	1.74766	9	5.14974	0.0282051	0.106085
GO:0001934~positive regulation of protein phosphorylation	1.61464	11	6.81267	0.0297868	0.110386
GO:0007409~axonogenesis	1.712	9	5.25702	0.0317122	0.114164
GO:0035690~cellular response to drug	1.89119	7	3.70137	0.0315235	0.114164
GO:0042733~embryonic digit morphogenesis	1.99733	6	3.00401	0.0335145	0.116614
GO:0035335~peptidyl-tyrosine dephosphorylation	1.6947	9	5.31067	0.0335751	0.116614
GO:0071300~cellular response to retinoic acid	1.86417	7	3.75502	0.033781	0.116614
GO:0016310~phosphorylation	1.67776	9	5.36431	0.0355125	0.120935
GO:0043401~steroid hormone mediated signaling pathway	1.96229	6	3.05766	0.0361795	0.121563
GO:0016485~protein processing	1.81239	7	3.8623	0.038615	0.127564
GO:0017148~negative regulation of translation	1.92845	6	3.1113	0.038978	0.127564
GO:0007283~spermatogenesis	1.25892	26	20.6526	0.0395842	0.127887
GO:0035725~sodium ion transmembrane transport	1.78756	7	3.91595	0.0411945	0.129763
GO:0007165~signal transduction	1.09185	68	62.2796	0.0409874	0.129763
GO:0030154~cell differentiation	1.2105	30	24.7831	0.0459807	0.143051
GO:0018108~peptidyl-tyrosine phosphorylation	1.4621	12	8.20739	0.0476321	0.146382
GO:0032355~response to estradiol	1.63883	8	4.88152	0.0496124	0.15063
GO:0016525~negative regulation of angiogenesis	1.80404	6	3.32587	0.0515376	0.154613
GO:0006874~cellular calcium ion homeostasis	1.60359	8	4.98881	0.0551924	0.157907
GO:0001525~angiogenesis	1.33752	16	11.9624	0.0544645	0.157907
GO:0007586~digestion	1.7754	6	3.37951	0.0550249	0.157907
GO:0014066~regulation of phosphatidylinositol 3-kinase signaling	1.67298	7	4.18416	0.0557686	0.157907
GO:0045666~positive regulation of neuron differentiation	1.67298	7	4.18416	0.0557686	0.157907
GO:0046854~phosphatidylinositol phosphorylation	1.58653	8	5.04245	0.0581274	0.162757
GO:0001503~ossification	1.63115	7	4.29145	0.0623983	0.167281
GO:0042060~wound healing	1.63115	7	4.29145	0.0623983	0.167281
GO:0009952~anterior/posterior pattern specification	1.63115	7	4.29145	0.0623983	0.167281
GO:0034765~regulation of ion transmembrane transport	1.51149	9	5.95438	0.0620423	0.167281
GO:0043410~positive regulation of MAPK cascade	1.61101	7	4.34509	0.0658873	0.174122
GO:0050790~regulation of catalytic activity	1.6947	6	3.54044	0.0663322	0.174122
GO:0043065~positive regulation of apoptotic process	1.24278	20	16.0929	0.068412	0.17773
GO:0050796~regulation of insulin secretion	1.66941	6	3.59409	0.070384	0.180987
GO:0060070~canonical Wnt signaling pathway	1.57219	7	4.45238	0.0732147	0.186365
GO:0006469~negative regulation of protein kinase activity	1.5064	8	5.31067	0.074274	0.187171
GO:0042493~response to drug	1.22643	20	16.3075	0.075985	0.189586
GO:0016337~single organismal cell-cell adhesion	1.47657	8	5.41795	0.0814253	0.201168
GO:0007267~cell-cell signaling	1.24767	17	13.6253	0.0824337	0.201682
GO:0030855~epithelial cell differentiation	1.59786	6	3.75502	0.0833852	0.202049
GO:0043547~positive regulation of GTPase activity	1.1218	34	30.3083	0.0851776	0.204426
GO:0006915~apoptotic process	1.11785	34	30.4156	0.0883267	0.208022
GO:0070588~calcium ion transmembrane transport	1.40988	9	6.38353	0.0877035	0.208022
GO:0001701~in utero embryonic development	1.29595	13	10.0313	0.0892631	0.208281
GO:0001889~liver development	1.51149	6	3.96959	0.102667	0.233083
GO:0007160~cell-matrix adhesion	1.44991	7	4.82788	0.102521	0.233083
GO:0048015~phosphatidylinositol-mediated signaling	1.40692	8	5.68617	0.101035	0.233083
GO:0000187~activation of MAPK activity	1.39377	8	5.73981	0.105251	0.236816
GO:0030509~BMP signaling pathway	1.47172	6	4.07687	0.113122	0.252272
GO:0071356~cellular response to tumor necrosis factor	1.35576	8	5.90074	0.118479	0.2619
GO:0090090~negative regulation of canonical Wnt signaling pathway	1.25803	11	8.74382	0.124757	0.27338
GO:0032496~response to lipopolysaccharide	1.25036	11	8.79747	0.128629	0.279435
GO:0090630~activation of GTPase activity	1.41583	6	4.2378	0.129782	0.279531
GO:0007166~cell surface receptor signaling pathway	1.1566	17	14.6982	0.136478	0.291462
GO:0008152~metabolic process	1.2279	11	8.9584	0.140636	0.297184
GO:0035023~regulation of Rho protein signal transduction	1.38087	6	4.34509	0.141516	0.297184
GO:0006813~potassium ion transport	1.36403	6	4.39873	0.147564	0.307324
GO:0001501~skeletal system development	1.22464	9	7.3491	0.165192	0.341215
GO:0071805~potassium ion transmembrane transport	1.23251	8	6.49081	0.174013	0.35081
GO:0043488~regulation of mRNA stability	1.26691	7	5.52524	0.171247	0.35081
GO:0070126~mitochondrial translational termination	1.30059	6	4.61331	0.172897	0.35081
GO:0045471~response to ethanol	1.24278	7	5.63252	0.183302	0.366604
GO:0007601~visual perception	1.11294	12	10.7823	0.21104	0.418756
GO:0043524~negative regulation of neuron apoptotic process	1.1298	8	7.08089	0.239098	0.470724
GO:0051092~positive regulation of NF-kappaB transcription factor activity	1.12131	8	7.13453	0.245401	0.479389
GO:0006367~transcription initiation from RNA polymerase II promoter	1.10379	9	8.15375	0.247893	0.480531
GO:0007204~positive regulation of cytosolic calcium ion concentration	1.11294	8	7.18817	0.25176	0.480633
GO:0006396~RNA processing	1.1531	6	5.20338	0.250562	0.480633
GO:0035556~intracellular signal transduction	1.01766	22	21.6182	0.254635	0.482466
GO:0008283~cell proliferation	1.01867	20	19.6334	0.262462	0.493585
GO:0016579~protein deubiquitination	1.1298	6	5.31067	0.265682	0.495941
GO:0010629~negative regulation of gene expression	1.08857	8	7.3491	0.271144	0.500305
GO:0098609~cell-cell adhesion	1.03183	15	14.5373	0.271991	0.500305
GO:0051091~positive regulation of sequence-specific DNA binding transcription factor activity	1.06524	6	5.63252	0.312315	0.570314
GO:0016567~protein ubiquitination	0.98661	19	19.2579	0.314734	0.570597
GO:0007568~aging	1.01682	9	8.85111	0.3287	0.59166
GO:0042127~regulation of cell proliferation	1.00766	10	9.92397	0.331798	0.593
GO:0006810~transport	0.964227	18	18.6678	0.354343	0.623415
GO:0030036~actin cytoskeleton organization	1.00379	7	6.9736	0.356237	0.623415
GO:0006979~response to oxidative stress	1.01682	6	5.90074	0.352176	0.623415
GO:0042981~regulation of apoptotic process	0.962718	11	11.426	0.381184	0.649043
GO:0043066~negative regulation of apoptotic process	0.942329	23	24.4076	0.380716	0.649043
GO:0016477~cell migration	0.975439	9	9.22661	0.374184	0.649043
GO:0016569~covalent chromatin modification	0.989826	6	6.06167	0.376321	0.649043
GO:0007275~multicellular organism development	0.930297	26	27.948	0.400259	0.663587
GO:0006886~intracellular protein transport	0.947885	12	12.6598	0.398055	0.663587
GO:0030198~extracellular matrix organization	0.951109	10	10.514	0.399806	0.663587
GO:0007219~Notch signaling pathway	0.972612	6	6.16896	0.392452	0.663587
GO:0051260~protein homooligomerization	0.947885	9	9.49483	0.407031	0.670403
GO:0033209~tumor necrosis factor-mediated signaling pathway	0.947885	6	6.32988	0.416634	0.681765
GO:0006397~mRNA processing	0.937294	9	9.60211	0.420191	0.683149
GO:0031175~neuron projection development	0.932086	5	5.36431	0.434557	0.693091
GO:0007417~central nervous system development	0.932086	6	6.43717	0.432707	0.693091
GO:0090263~positive regulation of canonical Wnt signaling pathway	0.932086	6	6.43717	0.432707	0.693091
GO:0030308~negative regulation of cell growth	0.924383	6	6.49081	0.440719	0.698498
GO:0006355~regulation of transcription, DNA-templated	0.892423	72	80.6792	0.489838	0.771495
GO:0006357~regulation of transcription from RNA polymerase II promoter	0.887701	21	23.6566	0.49524	0.775158
GO:0055114~oxidation-reduction process	0.881703	28	31.7567	0.513273	0.798425
GO:0009615~response to virus	0.847351	5	5.90074	0.520275	0.799447
GO:0019221~cytokine-mediated signaling pathway	0.85382	6	7.02724	0.519283	0.799447
GO:0000165~MAPK cascade	0.85382	12	14.0545	0.544474	0.827318
GO:0006486~protein glycosylation	0.824855	5	6.06167	0.544979	0.827318
GO:0006351~transcription, DNA-templated	0.877258	92	104.872	0.561564	0.842346
GO:0045766~positive regulation of angiogenesis	0.81051	5	6.16896	0.561122	0.842346
GO:0007608~sensory perception of smell	0.820705	7	8.52925	0.567564	0.846308
GO:0006897~endocytosis	0.804679	6	7.45639	0.578974	0.853224
GO:0006511~ubiquitin-dependent protein catabolic process	0.819417	8	9.76304	0.577049	0.853224
GO:0010951~negative regulation of endopeptidase activity	0.770319	5	6.49081	0.60779	0.886053
GO:0006412~translation	0.81051	11	13.5717	0.611798	0.886053
GO:0007229~integrin-mediated signaling pathway	0.753201	4	5.31067	0.60923	0.886053
GO:0010468~regulation of gene expression	0.745669	4	5.36431	0.617443	0.889119
GO:0006281~DNA repair	0.793265	10	12.6061	0.632394	0.905474
GO:0018105~peptidyl-serine phosphorylation	0.745669	5	6.70539	0.637302	0.907345
GO:0002576~platelet degranulation	0.723951	4	5.52524	0.641449	0.908118
GO:0006464~cellular protein modification process	0.710161	4	5.63252	0.65691	0.909568
GO:0046777~protein autophosphorylation	0.758675	7	9.22661	0.651926	0.909568
GO:0006811~ion transport	0.733926	5	6.81267	0.651545	0.909568
GO:0002223~stimulatory C-type lectin receptor signaling pathway	0.710161	4	5.63252	0.65691	0.909568
GO:0006936~muscle contraction	0.696887	4	5.73981	0.671929	0.922691
GO:0042787~protein ubiquitination involved in ubiquitin-dependent protein catabolic process	0.731048	6	8.20739	0.673711	0.922691
GO:0006914~autophagy	0.700817	5	7.13453	0.692137	0.942803
GO:0071222~cellular response to lipopolysaccharide	0.659884	4	6.06167	0.714287	0.959312
GO:0006888~ER to Golgi vesicle-mediated transport	0.699065	6	8.58289	0.715677	0.959312
GO:0050821~protein stabilization	0.685358	5	7.29546	0.711202	0.959312
GO:0006508~proteolysis	0.782953	21	26.8215	0.724764	0.961266
GO:0043123~positive regulation of I-kappaB kinase/NF-kappaB signaling	0.694723	6	8.63654	0.721362	0.961266
GO:0000184~nuclear-transcribed mRNA catabolic process, nonsense-mediated decay	0.626613	4	6.38353	0.752578	0.99293
GO:0006954~inflammatory response	0.639426	13	20.3307	0.896474	0.999999
GO:0055085~transmembrane transport	0.687605	9	13.0889	0.78296	0.999999
GO:0001666~response to hypoxia	0.541911	5	9.22661	0.87766	0.999999
GO:0007186~G-protein coupled receptor signaling pathway	0.663554	32	48.2251	0.96501	0.999999
GO:0006629~lipid metabolic process	0.593686	5	8.42197	0.821618	0.999999
GO:0038096~Fc-gamma receptor signaling pathway involved in phagocytosis	0.293571	2	6.81267	0.965802	0.999999
GO:0030168~platelet activation	0.486306	3	6.16896	0.861799	0.999999
GO:0007596~blood coagulation	0.506569	5	9.87033	0.911078	0.999999
GO:0006974~cellular response to DNA damage stimulus	0.627366	7	11.1578	0.828689	0.999999
GO:0007010~cytoskeleton organization	0.463149	4	8.63654	0.920823	0.999999
GO:0042742~defense response to bacterium	0.385691	3	7.77825	0.9464	0.999999
GO:0006457~protein folding	0.621391	6	9.65576	0.814571	0.999999
GO:0051726~regulation of cell cycle	0.45101	3	6.65174	0.894924	0.999999
GO:0006468~protein phosphorylation	0.654096	16	24.4612	0.904703	0.999999
GO:0007062~sister chromatid cohesion	0.542963	3	5.52524	0.803979	0.999999
GO:0006955~immune response	0.354237	8	22.5837	0.999029	0.999999
GO:0007264~small GTPase mediated signal transduction	0.682015	9	13.1962	0.790915	0.999999
GO:0007049~cell cycle	0.687253	8	11.6406	0.767916	0.999999
GO:0043161~proteasome-mediated ubiquitin-dependent protein catabolic process	0.642818	7	10.8895	0.809315	0.999999
GO:0050776~regulation of immune response	0	0	9.54847	0.999922	0.999999
GO:0045087~innate immune response	0.173411	4	23.0665	0.999996	0.999999
GO:0000209~protein polyubiquitination	0.607882	6	9.87033	0.83072	0.999999
GO:0006958~complement activation, classical pathway	0	0	5.31067	0.996147	0.999999
GO:0050900~leukocyte migration	0.611204	4	6.54446	0.770215	0.999999
GO:0015031~protein transport	0.66072	14	21.189	0.87969	0.999999
GO:0044267~cellular protein metabolic process	0.315962	2	6.32988	0.952327	0.999999
GO:0038095~Fc-epsilon receptor signaling pathway	0.314186	3	9.54847	0.98277	0.999999
GO:0051301~cell division	0.585883	11	18.7751	0.931784	0.999999
GO:0050852~T cell receptor signaling pathway	0.503831	4	7.93918	0.884837	0.999999
GO:0002250~adaptive immune response	0.251915	2	7.93918	0.984599	0.999999
GO:0051607~defense response to virus	0.451921	4	8.85111	0.929685	0.999999
GO:0006461~protein complex assembly	0.482114	3	6.2226	0.86588	0.999999
GO:0007067~mitotic nuclear division	0.676514	9	13.3035	0.798656	0.999999
GO:0060271~cilium morphogenesis	0.548286	4	7.29546	0.839921	0.999999
GO:0007050~cell cycle arrest	0.528843	4	7.56368	0.86016	0.999999
GO:0006364~rRNA processing	0.609776	7	11.4796	0.849867	0.999999
GO:0000086~G2/M transition of mitotic cell cycle	0.544284	4	7.3491	0.844153	0.999999
GO:0006935~chemotaxis	0.611204	4	6.54446	0.770215	0.999999
GO:0016032~viral process	0.436428	7	16.0393	0.983375	0.999999
GO:1901796~regulation of signal transduction by p53 class mediator	0.300673	2	6.65174	0.96177	0.999999
GO:0016055~Wnt signaling pathway	0.59813	6	10.0313	0.842084	0.999999
GO:0070374~positive regulation of ERK1 and ERK2 cascade	0.639145	6	9.38754	0.79273	0.999999
GO:0008360~regulation of cell shape	0.532621	4	7.51003	0.856293	0.999999
GO:0000082~G1/S transition of mitotic cell cycle	0.548286	3	5.4716	0.798366	0.999999
GO:0006898~receptor-mediated endocytosis	0.400897	4	9.97761	0.963177	0.999999
GO:0042593~glucose homeostasis	0.369143	2	5.41795	0.912403	0.999999
GO:0000398~mRNA splicing, via spliceosome	0.419859	5	11.9088	0.970299	0.999999
GO:0031047~gene silencing by RNA	0.167944	1	5.95438	0.983768	0.999999
GO:0016925~protein sumoylation	0	0	6.27624	0.998414	0.999999
GO:0006260~DNA replication	0.481077	4	8.31468	0.905671	0.999999
GO:0006470~protein dephosphorylation	0.591801	4	6.75903	0.792206	0.999999
GO:0016192~vesicle-mediated transport	0.490572	4	8.15375	0.897183	0.999999
GO:0042384~cilium assembly	0.601346	4	6.65174	0.781426	0.999999
GO:0019083~viral transcription	0.332888	2	6.00803	0.940729	0.999999
GO:0050911~detection of chemical stimulus involved in sensory perception of smell	0.131589	3	22.7983	0.999999	0.999999
GO:0008380~RNA splicing	0.561498	5	8.90475	0.857308	0.999999
GO:0006614~SRP-dependent cotranslational protein targeting to membrane	0.396633	2	5.04245	0.888402	0.999999
GO:0006413~translational initiation	0.408213	3	7.3491	0.930376	0.999999
GO:0006334~nucleosome assembly	0.46996	3	6.38353	0.877501	0.999999
GO:0006406~mRNA export from nucleus	0.372835	2	5.36431	0.90929	0.999999
GO:0050907~detection of chemical stimulus involved in sensory perception	0.196229	1	5.09609	0.968092	0.999999
GO:1902475~L-alpha-amino acid transmembrane transport	1.86417	1	0.536431	0.233566
GO:0033700~phospholipid efflux	1.33155	1	0.751003	0.319432
GO:0006418~tRNA aminoacylation for protein translation	0.466043	1	2.14572	0.717989
GO:0030968~endoplasmic reticulum unfolded protein response	0.414261	1	2.41394	0.765536
GO:0006400~tRNA modification	0.690434	1	1.44836	0.553285
GO:0051592~response to calcium ion	0.964227	3	3.1113	0.414939
GO:0006879~cellular iron ion homeostasis	0.423676	1	2.3603	0.756644
GO:0046359~butyrate catabolic process	0	0	0.0536431	0.52391
GO:0032024~positive regulation of insulin secretion	1.36403	3	2.19937	0.22167
GO:0021549~cerebellum development	1.00766	2	1.98479	0.396716
GO:0045964~positive regulation of dopamine metabolic process	4.66043	1	0.214572	0.095428
GO:0097151~positive regulation of inhibitory postsynaptic potential	2.6631	1	0.375502	0.165639
GO:0033602~negative regulation of dopamine secretion	6.21391	1	0.160929	0.0716761
GO:0035640~exploration behavior	2.48556	2	0.804646	0.0957344
GO:0043691~reverse cholesterol transport	0	0	0.965576	0.793124
GO:0006911~phagocytosis, engulfment	0	0	1.87751	0.910183
GO:0016197~endosomal transport	0.564901	2	3.54044	0.72397
GO:0060020~Bergmann glial cell differentiation	0	0	0.482788	0.678343
GO:0070373~negative regulation of ERK1 and ERK2 cascade	1.28564	4	3.1113	0.221988
GO:0032956~regulation of actin cytoskeleton organization	0.396633	1	2.52123	0.782451
GO:0006975~DNA damage induced protein phosphorylation	0	0	0.429145	0.662181
GO:0007173~epidermal growth factor receptor signaling pathway	0.665776	2	3.00401	0.630329
GO:0051882~mitochondrial depolarization	0	0	0.214572	0.589004
GO:0071871~response to epinephrine	0	0	0.214572	0.589004
GO:2001020~regulation of response to DNA damage stimulus	0	0	0.429145	0.662181
GO:0030035~microspike assembly	0	0	0.268215	0.608663
GO:0009308~amine metabolic process	0	0	0.429145	0.662181
GO:0010506~regulation of autophagy	1.1185	3	2.68215	0.323283
GO:0051289~protein homotetramerization	0.310695	1	3.21859	0.867904
GO:0045717~negative regulation of fatty acid biosynthetic process	0	0	0.643717	0.722342
GO:0019254~carnitine metabolic process, CoA-linked	0	0	0.160929	0.568359
GO:0051791~medium-chain fatty acid metabolic process	0	0	0.160929	0.568359
GO:0006635~fatty acid beta-oxidation	0.847351	2	2.3603	0.49044
GO:0055088~lipid homeostasis	0.477993	1	2.09208	0.707516
GO:0014070~response to organic cyclic compound	1.52177	4	2.62851	0.144761
GO:0019229~regulation of vasoconstriction	0.932086	1	1.07286	0.436314
GO:0071467~cellular response to pH	0	0	0.375502	0.645207
GO:0042391~regulation of membrane potential	0.248556	1	4.02323	0.927304
GO:0008306~associative learning	0	0	1.28743	0.845878
GO:0031623~receptor internalization	0	0	2.30665	0.939367
GO:0007190~activation of adenylate cyclase activity	0.932086	2	2.14572	0.437777
GO:0006695~cholesterol biosynthetic process	0.981144	2	2.03844	0.410533
GO:0006102~isocitrate metabolic process	0	0	0.268215	0.608663
GO:0006099~tricarboxylic acid cycle	0.642818	1	1.55565	0.582901
GO:0019395~fatty acid oxidation	0	0	0.751003	0.748281
GO:0034097~response to cytokine	1.07548	3	2.78944	0.34631
GO:0048545~response to steroid hormone	0.932086	1	1.07286	0.436314
GO:0060047~heart contraction	0	0	0.69736	0.735629
GO:0006928~movement of cell or subcellular component	0.433529	2	4.61331	0.853837
GO:2000017~positive regulation of determination of dorsal identity	9.32086	1	0.107286	0.0478204
GO:0061445~endocardial cushion cell fate commitment	0	0	0.0536431	0.52391
GO:2001237~negative regulation of extrinsic apoptotic signaling pathway	1.96229	4	2.03844	0.0700207
GO:0003203~endocardial cushion morphogenesis	2.33022	2	0.858289	0.107405
GO:0003289~atrial septum primum morphogenesis	3.72835	1	0.268215	0.119032
GO:0014894~response to denervation involved in regulation of muscle adaptation	0	0	0.375502	0.645207
GO:0031016~pancreas development	3.55081	4	1.1265	0.00942863
GO:0070527~platelet aggregation	0	0	2.19937	0.933108
GO:0090002~establishment of protein localization to plasma membrane	0.443851	1	2.25301	0.737949
GO:1901017~negative regulation of potassium ion transmembrane transporter activity	0	0	0.375502	0.645207
GO:0043268~positive regulation of potassium ion transport	0	0	0.536431	0.693733
GO:0048633~positive regulation of skeletal muscle tissue growth	0	0	0.268215	0.608663
GO:0014883~transition between fast and slow fiber	0	0	0.375502	0.645207
GO:0038092~nodal signaling pathway	0	0	0.321859	0.627382
GO:0046545~development of primary female sexual characteristics	13.9813	3	0.214572	0.000212741
GO:0032924~activin receptor signaling pathway	1.16511	1	0.858289	0.360057
GO:0023014~signal transduction by protein phosphorylation	0.423676	1	2.3603	0.756644
GO:0010862~positive regulation of pathway-restricted SMAD protein phosphorylation	1.55348	4	2.57487	0.13696
GO:0009791~post-embryonic development	0.766098	3	3.91595	0.574521
GO:0030324~lung development	0.735858	3	4.07687	0.603265
GO:0006796~phosphate-containing compound metabolic process	1.03565	1	0.965576	0.399033
GO:0043967~histone H4 acetylation	0.601346	1	1.66294	0.610886
GO:0003407~neural retina development	1.33155	1	0.751003	0.319432
GO:0030890~positive regulation of B cell proliferation	0.477993	1	2.09208	0.707516
GO:0001890~placenta development	1.59786	3	1.87751	0.158913
GO:0048286~lung alveolus development	0	0	1.82387	0.905663
GO:0042323~negative regulation of circadian sleep/wake cycle, non-REM sleep	0	0	0.107286	0.546678
GO:0060407~negative regulation of penile erection	0	0	0.0536431	0.52391
GO:0071560~cellular response to transforming growth factor beta stimulus	1.52177	4	2.62851	0.144761
GO:0030513~positive regulation of BMP signaling pathway	1.80404	3	1.66294	0.121011
GO:0002043~blood vessel endothelial cell proliferation involved in sprouting angiogenesis	2.6631	1	0.375502	0.165639
GO:0006069~ethanol oxidation	1.55348	1	0.643717	0.277233
GO:1901020~negative regulation of calcium ion transmembrane transporter activity	0	0	0.160929	0.568359
GO:0071881~adenylate cyclase-inhibiting adrenergic receptor signaling pathway	0	0	0.0536431	0.52391
GO:0045785~positive regulation of cell adhesion	0.867057	2	2.30665	0.477523
GO:0007162~negative regulation of cell adhesion	0	0	1.98479	0.918585
GO:0008355~olfactory learning	0	0	0.107286	0.546678
GO:0051044~positive regulation of membrane protein ectodomain proteolysis	0	0	0.804646	0.760328
GO:0007220~Notch receptor processing	0	0	0.858289	0.7718
GO:0016553~base conversion or substitution editing	0	0	0.214572	0.589004
GO:0060216~definitive hemopoiesis	1.16511	1	0.858289	0.360057
GO:0061484~hematopoietic stem cell homeostasis	0	0	0.268215	0.608663
GO:0035455~response to interferon-alpha	0	0	0.536431	0.693733
GO:0006382~adenosine to inosine editing	0	0	0.214572	0.589004
GO:0034199~activation of protein kinase A activity	1.03565	1	0.965576	0.399033
GO:0071377~cellular response to glucagon stimulus	1.39813	3	2.14572	0.210823
GO:0071361~cellular response to ethanol	1.33155	1	0.751003	0.319432
GO:0006171~cAMP biosynthetic process	1.09657	1	0.911933	0.379754
GO:0007189~adenylate cyclase-activating G-protein coupled receptor signaling pathway	1.86417	5	2.68215	0.0603169
GO:0060124~positive regulation of growth hormone secretion	0	0	0.429145	0.662181
GO:0010656~negative regulation of muscle cell apoptotic process	0	0	0.268215	0.608663
GO:0045860~positive regulation of protein kinase activity	0.396633	1	2.52123	0.782451
GO:0070445~regulation of oligodendrocyte progenitor proliferation	3.72835	1	0.268215	0.119032
GO:0019933~cAMP-mediated signaling	1.47172	3	2.03844	0.189553
GO:0060670~branching involved in labyrinthine layer morphogenesis	0	0	0.482788	0.678343
GO:0051017~actin filament bundle assembly	1.86417	3	1.60929	0.112155
GO:0006175~dATP biosynthetic process	0	0	0.0536431	0.52391
GO:0045909~positive regulation of vasodilation	1.28564	2	1.55565	0.283216
GO:0019732~antifungal humoral response	1.86417	1	0.536431	0.233566
GO:0001843~neural tube closure	0.726301	3	4.13052	0.612571
GO:0045776~negative regulation of blood pressure	0.621391	1	1.60929	0.597094
GO:0051930~regulation of sensory perception of pain	2.15097	3	1.39472	0.0796113
GO:0060079~excitatory postsynaptic potential	2.6631	4	1.50201	0.0261854
GO:0007600~sensory perception	0	0	0.69736	0.735629
GO:0006612~protein targeting to membrane	0.71699	1	1.39472	0.537853
GO:0051924~regulation of calcium ion transport	1.55348	2	1.28743	0.212227
GO:0060134~prepulse inhibition	4.30194	3	0.69736	0.0121856
GO:0014049~positive regulation of glutamate secretion	0	0	0.375502	0.645207
GO:0006968~cellular defense response	0	0	3.32587	0.976173
GO:0010332~response to gamma radiation	1.20269	2	1.66294	0.311871
GO:0044030~regulation of DNA methylation	0	0	0.751003	0.748281
GO:0070212~protein poly-ADP-ribosylation	0	0	0.160929	0.568359
GO:0000724~double-strand break repair via homologous recombination	0.503831	2	3.96959	0.784365
GO:1903376~regulation of oxidative stress-induced neuron intrinsic apoptotic signaling pathway	0	0	0.0536431	0.52391
GO:0006471~protein ADP-ribosylation	0.887701	1	1.1265	0.454312
GO:0006259~DNA metabolic process	0	0	1.39472	0.860287
GO:0045987~positive regulation of smooth muscle contraction	0.887701	1	1.1265	0.454312
GO:0060073~micturition	0	0	0.107286	0.546678
GO:0019886~antigen processing and presentation of exogenous peptide antigen via MHC class II	0.405255	2	4.93516	0.880528
GO:0033327~Leydig cell differentiation	1.86417	1	0.536431	0.233566
GO:0030238~male sex determination	5.08411	3	0.590074	0.00739002
GO:0009409~response to cold	2.0713	4	1.93115	0.0593189
GO:0035625~epidermal growth factor-activated receptor transactivation by G-protein coupled receptor signaling pathway	0	0	0.214572	0.589004
GO:0045907~positive regulation of vasoconstriction	1.74766	3	1.71658	0.130128
GO:0040015~negative regulation of multicellular organism growth	0	0	0.643717	0.722342
GO:1904504~positive regulation of lipophagy	0	0	0.214572	0.589004
GO:0002025~vasodilation by norepinephrine-epinephrine involved in regulation of systemic arterial blood pressure	0	0	0.160929	0.568359
GO:0050873~brown fat cell differentiation	0.582554	1	1.71658	0.624281
GO:0071880~adenylate cyclase-activating adrenergic receptor signaling pathway	0.981144	1	1.01922	0.417887
GO:0060048~cardiac muscle contraction	0.414261	1	2.41394	0.765536
GO:0002029~desensitization of G-protein coupled receptor protein signaling pathway	0	0	0.107286	0.546678
GO:0018107~peptidyl-threonine phosphorylation	0.981144	2	2.03844	0.410533
GO:0006189~'de novo' IMP biosynthetic process	3.10695	1	0.321859	0.142447
GO:0071639~positive regulation of monocyte chemotactic protein-1 production	2.6631	1	0.375502	0.165639
GO:0060359~response to ammonium ion	0	0	0.0536431	0.52391
GO:0048268~clathrin coat assembly	2.86796	2	0.69736	0.0737686
GO:0035904~aorta development	0	0	0.965576	0.793124
GO:0060071~Wnt signaling pathway, planar cell polarity pathway	1.01314	5	4.93516	0.363956
GO:0003281~ventricular septum development	0.665776	1	1.50201	0.5683
GO:0050690~regulation of defense response to virus by virus	0.665776	1	1.50201	0.5683
GO:0043323~positive regulation of natural killer cell degranulation	0	0	0.107286	0.546678
GO:0007517~muscle organ development	0.837831	4	4.77424	0.521726
GO:0009611~response to wounding	0.591801	2	3.37951	0.698067
GO:0009755~hormone-mediated signaling pathway	0.665776	1	1.50201	0.5683
GO:0032868~response to insulin	0.55647	2	3.59409	0.732199
GO:0060259~regulation of feeding behavior	0	0	0.429145	0.662181
GO:0001974~blood vessel remodeling	1.16511	2	1.71658	0.326171
GO:0060411~cardiac septum morphogenesis	0	0	0.536431	0.693733
GO:0045429~positive regulation of nitric oxide biosynthetic process	0.867057	2	2.30665	0.477523
GO:0007200~phospholipase C-activating G-protein coupled receptor signaling pathway	1.41225	5	3.54044	0.151293
GO:0061049~cell growth involved in cardiac muscle cell development	2.33022	1	0.429145	0.188574
GO:0042311~vasodilation	1.33155	1	0.751003	0.319432
GO:0048144~fibroblast proliferation	0	0	0.107286	0.546678
GO:0003014~renal system process	0	0	0.482788	0.678343
GO:0010873~positive regulation of cholesterol esterification	0	0	0.482788	0.678343
GO:0086097~phospholipase C-activating angiotensin-activated signaling pathway	0	0	0.107286	0.546678
GO:0001991~regulation of systemic arterial blood pressure by circulatory renin-angiotensin	0	0	0.0536431	0.52391
GO:0042990~regulation of transcription factor import into nucleus	0	0	0.107286	0.546678
GO:0035932~aldosterone secretion	0	0	0.0536431	0.52391
GO:0072006~nephron development	0	0	0.214572	0.589004
GO:0046686~response to cadmium ion	0.745669	1	1.34108	0.522
GO:0006779~porphyrin-containing compound biosynthetic process	0	0	0.429145	0.662181
GO:0010212~response to ionizing radiation	0.760887	2	2.62851	0.552253
GO:0071353~cellular response to interleukin-4	0	0	1.28743	0.845878
GO:0042572~retinol metabolic process	1.24278	2	1.60929	0.297547
GO:0060013~righting reflex	2.0713	1	0.482788	0.211225
GO:0030388~fructose 1,6-bisphosphate metabolic process	0	0	0.375502	0.645207
GO:0021695~cerebellar cortex development	0	0	0.321859	0.627382
GO:0006805~xenobiotic metabolic process	1.19498	5	4.18416	0.243149
GO:2000406~positive regulation of T cell migration	0	0	0.536431	0.693733
GO:0046033~AMP metabolic process	3.72835	1	0.268215	0.119032
GO:0046627~negative regulation of insulin receptor signaling pathway	0.642818	1	1.55565	0.582901
GO:0014739~positive regulation of muscle hyperplasia	0	0	0.0536431	0.52391
GO:0071315~cellular response to morphine	0	0	0.160929	0.568359
GO:0071673~positive regulation of smooth muscle cell chemotaxis	0	0	0.160929	0.568359
GO:0015949~nucleobase-containing small molecule interconversion	0.745669	1	1.34108	0.522
GO:0046034~ATP metabolic process	0.582554	1	1.71658	0.624281
GO:0100002~negative regulation of protein kinase activity by protein phosphorylation	0	0	0.0536431	0.52391
GO:0005978~glycogen biosynthetic process	0.71699	1	1.39472	0.537853
GO:0006417~regulation of translation	0.71699	2	2.78944	0.586965
GO:1902176~negative regulation of oxidative stress-induced intrinsic apoptotic signaling pathway	0	0	0.751003	0.748281
GO:0034405~response to fluid shear stress	0	0	0.482788	0.678343
GO:0001938~positive regulation of endothelial cell proliferation	0.27017	1	3.70137	0.907465
GO:0051000~positive regulation of nitric-oxide synthase activity	0.847351	1	1.18015	0.471879
GO:1990418~response to insulin-like growth factor stimulus	0	0	0.107286	0.546678
GO:0032287~peripheral nervous system myelin maintenance	0	0	0.375502	0.645207
GO:0090004~positive regulation of establishment of protein localization to plasma membrane	1.24278	2	1.60929	0.297547
GO:0006809~nitric oxide biosynthetic process	2.86796	2	0.69736	0.0737686
GO:0030334~regulation of cell migration	0.251915	1	3.96959	0.924305
GO:0044598~doxorubicin metabolic process	0	0	0.429145	0.662181
GO:0006783~heme biosynthetic process	0	0	1.1265	0.821436
GO:0001895~retina homeostasis	0.466043	1	2.14572	0.717989
GO:1990138~neuron projection extension	1.96229	2	1.01922	0.144685
GO:0031290~retinal ganglion cell axon guidance	2.94343	3	1.01922	0.0354847
GO:0042760~very long-chain fatty acid catabolic process	0	0	0.321859	0.627382
GO:0006066~alcohol metabolic process	0	0	0.321859	0.627382
GO:0051384~response to glucocorticoid	0	0	3.4868	0.979442
GO:0045329~carnitine biosynthetic process	0	0	0.268215	0.608663
GO:0000038~very long-chain fatty acid metabolic process	1.33155	1	0.751003	0.319432
GO:0046716~muscle cell cellular homeostasis	0	0	1.01922	0.803027
GO:0007015~actin filament organization	1.03565	4	3.8623	0.357274
GO:0006094~gluconeogenesis	1.27103	3	2.3603	0.254894
GO:0001894~tissue homeostasis	0	0	1.01922	0.803027
GO:0009414~response to water deprivation	3.10695	1	0.321859	0.142447
GO:0044597~daunorubicin metabolic process	0	0	0.429145	0.662181
GO:0097238~cellular response to methylglyoxal	0	0	0.0536431	0.52391
GO:0016311~dephosphorylation	1.08382	5	4.61331	0.311211
GO:2001300~lipoxin metabolic process	3.72835	1	0.268215	0.119032
GO:2001306~lipoxin B4 biosynthetic process	0	0	0.0536431	0.52391
GO:0019372~lipoxygenase pathway	1.43398	1	0.69736	0.298524
GO:0046513~ceramide biosynthetic process	0	0	1.34108	0.853259
GO:0002820~negative regulation of adaptive immune response	0	0	0.160929	0.568359
GO:0045926~negative regulation of growth	0	0	1.01922	0.803027
GO:0030163~protein catabolic process	0.454676	1	2.19937	0.728131
GO:0018298~protein-chromophore linkage	0	0	0.858289	0.7718
GO:0050801~ion homeostasis	0	0	0.214572	0.589004
GO:0031214~biomineral tissue development	0	0	1.34108	0.853259
GO:0070936~protein K48-linked ubiquitination	0.396633	1	2.52123	0.782451
GO:0051865~protein autoubiquitination	0	0	2.68215	0.957015
GO:0001837~epithelial to mesenchymal transition	1.09657	2	1.82387	0.354627
GO:0032967~positive regulation of collagen biosynthetic process	0	0	1.23379	0.838127
GO:2000355~negative regulation of ovarian follicle development	0	0	0.0536431	0.52391
GO:0042692~muscle cell differentiation	1.24278	1	0.804646	0.339946
GO:0034394~protein localization to cell surface	1.6947	2	1.18015	0.184598
GO:0050918~positive chemotaxis	0.532621	1	1.87751	0.662153
GO:0060135~maternal process involved in female pregnancy	0.745669	1	1.34108	0.522
GO:0031100~organ regeneration	0.793265	2	2.52123	0.528102
GO:0060307~regulation of ventricular cardiac muscle cell membrane repolarization	0	0	0.911933	0.782723
GO:0086015~SA node cell action potential	0	0	0.321859	0.627382
GO:0070296~sarcoplasmic reticulum calcium ion transport	0	0	0.268215	0.608663
GO:1901018~positive regulation of potassium ion transmembrane transporter activity	0	0	0.321859	0.627382
GO:0071286~cellular response to magnesium ion	0	0	0.321859	0.627382
GO:0032743~positive regulation of interleukin-2 production	2.6631	2	0.751003	0.0845083
GO:0031340~positive regulation of vesicle fusion	2.6631	1	0.375502	0.165639
GO:0042102~positive regulation of T cell proliferation	0	0	3.21859	0.97371
GO:0032508~DNA duplex unwinding	0.847351	2	2.3603	0.49044
GO:0014839~myoblast migration involved in skeletal muscle regeneration	0	0	0.107286	0.546678
GO:0000733~DNA strand renaturation	2.0713	1	0.482788	0.211225
GO:0002548~monocyte chemotaxis	0	0	2.25301	0.936314
GO:1900121~negative regulation of receptor binding	2.6631	1	0.375502	0.165639
GO:0043086~negative regulation of catalytic activity	0.745669	3	4.02323	0.59382
GO:0006816~calcium ion transport	0.735858	3	4.07687	0.603265
GO:0042997~negative regulation of Golgi to plasma membrane protein transport	0	0	0.214572	0.589004
GO:0008653~lipopolysaccharide metabolic process	0	0	0.0536431	0.52391
GO:0042816~vitamin B6 metabolic process	0	0	0.160929	0.568359
GO:0006953~acute-phase response	0	0	2.09208	0.926202
GO:0070059~intrinsic apoptotic signaling pathway in response to endoplasmic reticulum stress	0.564901	1	1.77022	0.637286
GO:1902510~regulation of apoptotic DNA fragmentation	0	0	0.214572	0.589004
GO:0008635~activation of cysteine-type endopeptidase activity involved in apoptotic process by cytochrome c	0	0	0.482788	0.678343
GO:0006869~lipid transport	0	0	4.07687	0.988036
GO:0050714~positive regulation of protein secretion	0	0	1.93115	0.914487
GO:0010039~response to iron ion	1.03565	1	0.965576	0.399033
GO:0007026~negative regulation of microtubule depolymerization	2.94343	3	1.01922	0.0354847
GO:0006921~cellular component disassembly involved in execution phase of apoptosis	0.887701	1	1.1265	0.454312
GO:0045656~negative regulation of monocyte differentiation	0	0	0.375502	0.645207
GO:0002458~peripheral T cell tolerance induction	0	0	0.0536431	0.52391
GO:0035666~TRIF-dependent toll-like receptor signaling pathway	0.665776	1	1.50201	0.5683
GO:0007249~I-kappaB kinase/NF-kappaB signaling	0.932086	3	3.21859	0.437434
GO:0039535~regulation of RIG-I signaling pathway	0	0	0.107286	0.546678
GO:0034121~regulation of toll-like receptor signaling pathway	0	0	0.214572	0.589004
GO:0000723~telomere maintenance	1.03565	2	1.93115	0.382785
GO:0007193~adenylate cyclase-inhibiting G-protein coupled receptor signaling pathway	1.1899	3	2.52123	0.288875
GO:0080111~DNA demethylation	0	0	0.858289	0.7718
GO:1903507~negative regulation of nucleic acid-templated transcription	0.793265	2	2.52123	0.528102
GO:1990001~inhibition of cysteine-type endopeptidase activity involved in apoptotic process	0	0	0.482788	0.678343
GO:0031503~protein complex localization	0	0	0.160929	0.568359
GO:0061178~regulation of insulin secretion involved in cellular response to glucose stimulus	1.09657	1	0.911933	0.379754
GO:0034197~triglyceride transport	0	0	0.268215	0.608663
GO:0042158~lipoprotein biosynthetic process	2.0713	1	0.482788	0.211225
GO:0018206~peptidyl-methionine modification	0	0	0.321859	0.627382
GO:0060621~negative regulation of cholesterol import	0	0	0.107286	0.546678
GO:0034375~high-density lipoprotein particle remodeling	0	0	0.804646	0.760328
GO:0007159~leukocyte cell-cell adhesion	0	0	1.34108	0.853259
GO:0034379~very-low-density lipoprotein particle assembly	2.33022	1	0.429145	0.188574
GO:0010886~positive regulation of cholesterol storage	5.32621	2	0.375502	0.0220809
GO:0044257~cellular protein catabolic process	2.33022	2	0.858289	0.107405
GO:0009566~fertilization	2.33022	5	2.14572	0.0259783
GO:0090310~negative regulation of methylation-dependent chromatin silencing	0	0	0.160929	0.568359
GO:0009972~cytidine deamination	0	0	0.482788	0.678343
GO:0050919~negative chemotaxis	1.09657	2	1.82387	0.354627
GO:0050713~negative regulation of interleukin-1 beta secretion	0	0	0.375502	0.645207
GO:0060761~negative regulation of response to cytokine stimulus	0	0	0.268215	0.608663
GO:0031102~neuron projection regeneration	0	0	0.429145	0.662181
GO:0030300~regulation of intestinal cholesterol absorption	0	0	0.268215	0.608663
GO:0006644~phospholipid metabolic process	0.345217	1	2.89673	0.83329
GO:0070508~cholesterol import	0	0	0.321859	0.627382
GO:0001935~endothelial cell proliferation	0	0	0.965576	0.793124
GO:0035025~positive regulation of Rho protein signal transduction	0.71699	1	1.39472	0.537853
GO:0071320~cellular response to cAMP	0.71699	2	2.78944	0.586965
GO:0042157~lipoprotein metabolic process	0.981144	2	2.03844	0.410533
GO:0010898~positive regulation of triglyceride catabolic process	0	0	0.429145	0.662181
GO:0010897~negative regulation of triglyceride catabolic process	0	0	0.214572	0.589004
GO:0048261~negative regulation of receptor-mediated endocytosis	0	0	0.429145	0.662181
GO:0034382~chylomicron remnant clearance	0	0	0.321859	0.627382
GO:1900016~negative regulation of cytokine production involved in inflammatory response	0	0	0.375502	0.645207
GO:0006641~triglyceride metabolic process	0.532621	1	1.87751	0.662153
GO:0010890~positive regulation of sequestering of triglyceride	0	0	0.375502	0.645207
GO:0048662~negative regulation of smooth muscle cell proliferation	0	0	1.55565	0.879416
GO:0060588~negative regulation of lipoprotein lipid oxidation	0	0	0.0536431	0.52391
GO:0042308~negative regulation of protein import into nucleus	0	0	0.375502	0.645207
GO:0000302~response to reactive oxygen species	0	0	2.09208	0.926202
GO:1902998~positive regulation of neurofibrillary tangle assembly	0	0	0.107286	0.546678
GO:0015909~long-chain fatty acid transport	0	0	0.643717	0.722342
GO:0009992~cellular water homeostasis	0	0	0.69736	0.735629
GO:0006833~water transport	0	0	1.07286	0.812457
GO:1990090~cellular response to nerve growth factor stimulus	0	0	1.66294	0.890692
GO:0071346~cellular response to interferon-gamma	0.654096	2	3.05766	0.640641
GO:0007617~mating behavior	2.6631	1	0.375502	0.165639
GO:0051563~smooth endoplasmic reticulum calcium ion homeostasis	0	0	0.107286	0.546678
GO:0001967~suckling behavior	2.86796	2	0.69736	0.0737686
GO:0097296~activation of cysteine-type endopeptidase activity involved in apoptotic signaling pathway	1.43398	1	0.69736	0.298524
GO:1902041~regulation of extrinsic apoptotic signaling pathway via death domain receptors	1.09657	1	0.911933	0.379754
GO:0019724~B cell mediated immunity	0	0	0.160929	0.568359
GO:0071285~cellular response to lithium ion	0	0	0.69736	0.735629
GO:0010467~gene expression	0.388369	1	2.57487	0.790487
GO:0048388~endosomal lumen acidification	0	0	0.160929	0.568359
GO:0070848~response to growth factor	1.16511	1	0.858289	0.360057
GO:0045176~apical protein localization	1.6947	1	0.590074	0.255575
GO:0003091~renal water homeostasis	1.16511	2	1.71658	0.326171
GO:0071241~cellular response to inorganic substance	0	0	0.107286	0.546678
GO:0072488~ammonium transmembrane transport	0	0	0.482788	0.678343
GO:0003097~renal water transport	0	0	0.107286	0.546678
GO:0015701~bicarbonate transport	0.847351	2	2.3603	0.49044
GO:0046878~positive regulation of saliva secretion	0	0	0.160929	0.568359
GO:0042631~cellular response to water deprivation	0	0	0.160929	0.568359
GO:0009404~toxin metabolic process	0	0	0.321859	0.627382
GO:0031584~activation of phospholipase D activity	0	0	0.321859	0.627382
GO:0015670~carbon dioxide transport	0	0	0.214572	0.589004
GO:0015793~glycerol transport	0	0	0.69736	0.735629
GO:0015706~nitrate transport	0	0	0.0536431	0.52391
GO:0090003~regulation of establishment of protein localization to plasma membrane	6.21391	1	0.160929	0.0716761
GO:0060520~activation of prostate induction by androgen receptor signaling pathway	18.6417	1	0.0536431	0.0239102
GO:0060736~prostate gland growth	4.66043	2	0.429145	0.0289391
GO:0060599~lateral sprouting involved in mammary gland duct morphogenesis	9.32086	1	0.107286	0.0478204
GO:0008344~adult locomotory behavior	0.358495	1	2.78944	0.820006
GO:0043085~positive regulation of catalytic activity	0.690434	3	4.34509	0.648373
GO:0036089~cleavage furrow formation	0	0	0.375502	0.645207
GO:0060292~long term synaptic depression	2.33022	2	0.858289	0.107405
GO:0006890~retrograde vesicle-mediated transport, Golgi to ER	0.909353	4	4.39873	0.455621
GO:0061512~protein localization to cilium	1.03565	1	0.965576	0.399033
GO:0030838~positive regulation of actin filament polymerization	0.414261	1	2.41394	0.765536
GO:0030866~cortical actin cytoskeleton organization	1.55348	2	1.28743	0.212227
GO:0070301~cellular response to hydrogen peroxide	0.327048	1	3.05766	0.85153
GO:0032964~collagen biosynthetic process	3.10695	1	0.321859	0.142447
GO:0033688~regulation of osteoblast proliferation	0	0	0.160929	0.568359
GO:0048013~ephrin receptor signaling pathway	1.08382	5	4.61331	0.311211
GO:0043149~stress fiber assembly	1.24278	1	0.804646	0.339946
GO:0010595~positive regulation of endothelial cell migration	0.405255	1	2.46758	0.774136
GO:0071479~cellular response to ionizing radiation	1.20269	2	1.66294	0.311871
GO:0060193~positive regulation of lipase activity	0	0	0.160929	0.568359
GO:0009967~positive regulation of signal transduction	0.916806	3	3.27223	0.448575
GO:0007266~Rho protein signal transduction	0.372835	1	2.68215	0.805757
GO:0071260~cellular response to mechanical stimulus	0.787679	3	3.80866	0.554693
GO:0050771~negative regulation of axonogenesis	2.94343	3	1.01922	0.0354847
GO:0071526~semaphorin-plexin signaling pathway	0.564901	1	1.77022	0.637286
GO:0034260~negative regulation of GTPase activity	1.30059	3	2.30665	0.243718
GO:0051457~maintenance of protein location in nucleus	0	0	0.69736	0.735629
GO:0042753~positive regulation of circadian rhythm	2.33022	1	0.429145	0.188574
GO:0007623~circadian rhythm	0.745669	3	4.02323	0.59382
GO:0051775~response to redox state	0	0	0.536431	0.693733
GO:0090403~oxidative stress-induced premature senescence	0	0	0.214572	0.589004
GO:0045599~negative regulation of fat cell differentiation	1.33155	3	2.25301	0.232639
GO:0002092~positive regulation of receptor internalization	1.55348	2	1.28743	0.212227
GO:0032088~negative regulation of NF-kappaB transcription factor activity	0.525119	2	3.80866	0.763147
GO:0032720~negative regulation of tumor necrosis factor production	0.490572	1	2.03844	0.696703
GO:0042699~follicle-stimulating hormone signaling pathway	4.66043	1	0.214572	0.095428
GO:0050731~positive regulation of peptidyl-tyrosine phosphorylation	0.909353	4	4.39873	0.455621
GO:0099565~chemical synaptic transmission, postsynaptic	0	0	0.268215	0.608663
GO:0043627~response to estrogen	0.860388	3	3.4868	0.492282
GO:0008544~epidermis development	0.657943	3	4.55966	0.681854
GO:0030317~sperm motility	0.345217	1	2.89673	0.83329
GO:0007158~neuron cell-cell adhesion	2.33022	2	0.858289	0.107405
GO:0030641~regulation of cellular pH	0	0	0.107286	0.546678
GO:0015991~ATP hydrolysis coupled proton transport	1.16511	2	1.71658	0.326171
GO:0071305~cellular response to vitamin D	4.66043	2	0.429145	0.0289391
GO:0006878~cellular copper ion homeostasis	0	0	0.69736	0.735629
GO:0006825~copper ion transport	1.24278	1	0.804646	0.339946
GO:0030001~metal ion transport	0	0	0.375502	0.645207
GO:0051208~sequestering of calcium ion	0	0	0.214572	0.589004
GO:0003358~noradrenergic neuron development	0	0	0.160929	0.568359
GO:0021892~cerebral cortex GABAergic interneuron differentiation	0	0	0.107286	0.546678
GO:0022008~neurogenesis	1.33155	3	2.25301	0.232639
GO:0031668~cellular response to extracellular stimulus	0	0	0.965576	0.793124
GO:0030282~bone mineralization	1.09657	2	1.82387	0.354627
GO:0040030~regulation of molecular function, epigenetic	0	0	0.107286	0.546678
GO:0000050~urea cycle	0	0	0.643717	0.722342
GO:0046219~indolalkylamine biosynthetic process	0	0	0.268215	0.608663
GO:0045048~protein insertion into ER membrane	0	0	0.107286	0.546678
GO:0060314~regulation of ryanodine-sensitive calcium-release channel activity	0.981144	1	1.01922	0.417887
GO:0042789~mRNA transcription from RNA polymerase II promoter	0	0	0.911933	0.782723
GO:0007584~response to nutrient	1.25958	5	3.96959	0.210835
GO:0071549~cellular response to dexamethasone stimulus	1.28564	2	1.55565	0.283216
GO:0006526~arginine biosynthetic process	0	0	0.268215	0.608663
GO:0045663~positive regulation of myoblast differentiation	0.887701	1	1.1265	0.454312
GO:0061394~regulation of transcription from RNA polymerase II promoter in response to arsenic-containing substance	0	0	0.0536431	0.52391
GO:0036499~PERK-mediated unfolded protein response	0	0	0.643717	0.722342
GO:0007214~gamma-aminobutyric acid signaling pathway	0.847351	1	1.18015	0.471879
GO:0009168~purine ribonucleoside monophosphate biosynthetic process	1.43398	1	0.69736	0.298524
GO:0046654~tetrahydrofolate biosynthetic process	0	0	0.321859	0.627382
GO:0006977~DNA damage response, signal transduction by p53 class mediator resulting in cell cycle arrest	0.601346	2	3.32587	0.689021
GO:0021930~cerebellar granule cell precursor proliferation	3.10695	1	0.321859	0.142447
GO:0051966~regulation of synaptic transmission, glutamatergic	3.24204	4	1.23379	0.0131445
GO:0010248~establishment or maintenance of transmembrane electrochemical gradient	1.43398	1	0.69736	0.298524
GO:0000729~DNA double-strand break processing	1.24278	1	0.804646	0.339946
GO:0007004~telomere maintenance via telomerase	1.03565	1	0.965576	0.399033
GO:1904358~positive regulation of telomere maintenance via telomere lengthening	0	0	0.107286	0.546678
GO:0036289~peptidyl-serine autophosphorylation	6.21391	2	0.321859	0.0160424
GO:0045141~meiotic telomere clustering	0	0	0.482788	0.678343
GO:0048813~dendrite morphogenesis	1.51149	3	1.98479	0.179157
GO:0042668~auditory receptor cell fate determination	0	0	0.160929	0.568359
GO:0036376~sodium ion export from cell	1.86417	1	0.536431	0.233566
GO:0086009~membrane repolarization	0	0	0.482788	0.678343
GO:1990573~potassium ion import across plasma membrane	2.0713	1	0.482788	0.211225
GO:0051946~regulation of glutamate uptake involved in transmission of nerve impulse	0	0	0.107286	0.546678
GO:0055119~relaxation of cardiac muscle	1.55348	1	0.643717	0.277233
GO:0086036~regulation of cardiac muscle cell membrane potential	0	0	0.429145	0.662181
GO:0008542~visual learning	1.65704	4	2.41394	0.11468
GO:1903416~response to glycoside	0	0	0.160929	0.568359
GO:0006883~cellular sodium ion homeostasis	1.96229	2	1.01922	0.144685
GO:0006885~regulation of pH	3.49532	3	0.858289	0.0221263
GO:1903779~regulation of cardiac conduction	1.33155	4	3.00401	0.203878
GO:0086064~cell communication by electrical coupling involved in cardiac conduction	1.43398	1	0.69736	0.298524
GO:0090662~ATP hydrolysis coupled transmembrane transport	0	0	0.214572	0.589004
GO:0032470~positive regulation of endoplasmic reticulum calcium ion concentration	0	0	0.107286	0.546678
GO:0014898~cardiac muscle hypertrophy in response to stress	1.24278	1	0.804646	0.339946
GO:0033292~T-tubule organization	0	0	0.160929	0.568359
GO:0033138~positive regulation of peptidyl-serine phosphorylation	1.33155	5	3.75502	0.18011
GO:0006091~generation of precursor metabolites and energy	1.75865	5	2.84308	0.0740785
GO:0015986~ATP synthesis coupled proton transport	0	0	1.18015	0.829986
GO:0007588~excretion	0.503831	1	1.98479	0.685544
GO:0045299~otolith mineralization	0	0	0.0536431	0.52391
GO:0007595~lactation	0.887701	2	2.25301	0.464436
GO:0051599~response to hydrostatic pressure	0	0	0.214572	0.589004
GO:1901660~calcium ion export	12.4278	2	0.160929	0.00337163
GO:0098703~calcium ion import across plasma membrane	0	0	0.268215	0.608663
GO:0051001~negative regulation of nitric-oxide synthase activity	0	0	0.429145	0.662181
GO:0010751~negative regulation of nitric oxide mediated signal transduction	0	0	0.160929	0.568359
GO:1902600~hydrogen ion transmembrane transport	0.305602	1	3.27223	0.872977
GO:0010243~response to organonitrogen compound	0	0	0.751003	0.748281
GO:0006754~ATP biosynthetic process	0.642818	1	1.55565	0.582901
GO:0042776~mitochondrial ATP synthesis coupled proton transport	0	0	1.1265	0.821436
GO:0090383~phagosome acidification	0.690434	1	1.44836	0.553285
GO:0042417~dopamine metabolic process	1.6947	1	0.590074	0.255575
GO:0010273~detoxification of copper ion	0	0	0.160929	0.568359
GO:0015992~proton transport	0.380443	1	2.62851	0.798254
GO:0008286~insulin receptor signaling pathway	0.238997	1	4.18416	0.935636
GO:0016241~regulation of macroautophagy	0.423676	1	2.3603	0.756644
GO:0033572~transferrin transport	0.532621	1	1.87751	0.662153
GO:0006568~tryptophan metabolic process	0	0	0.160929	0.568359
GO:0043473~pigmentation	2.6631	3	1.1265	0.0462864
GO:0021702~cerebellar Purkinje cell differentiation	1.55348	1	0.643717	0.277233
GO:0015677~copper ion import	5.32621	2	0.375502	0.0220809
GO:0072711~cellular response to hydroxyurea	7.98931	3	0.375502	0.00173037
GO:0035811~negative regulation of urine volume	0	0	0.268215	0.608663
GO:0070198~protein localization to chromosome, telomeric region	2.0713	1	0.482788	0.211225
GO:0097695~establishment of macromolecular complex localization to telomere	0	0	0.107286	0.546678
GO:0043517~positive regulation of DNA damage response, signal transduction by p53 class mediator	0	0	0.643717	0.722342
GO:0031297~replication fork processing	1.38087	2	1.44836	0.254619
GO:0030900~forebrain development	2.02627	5	2.46758	0.0444704
GO:0002125~maternal aggressive behavior	0	0	0.214572	0.589004
GO:0003084~positive regulation of systemic arterial blood pressure	2.0713	1	0.482788	0.211225
GO:0032609~interferon-gamma production	0	0	0.375502	0.645207
GO:0031398~positive regulation of protein ubiquitination	0	0	3.43316	0.978405
GO:0050930~induction of positive chemotaxis	1.24278	1	0.804646	0.339946
GO:0071281~cellular response to iron ion	3.10695	1	0.321859	0.142447
GO:0006310~DNA recombination	0.449198	2	4.45238	0.838609
GO:0046718~viral entry into host cell	0.699065	3	4.29145	0.639638
GO:0034101~erythrocyte homeostasis	0	0	0.482788	0.678343
GO:0001779~natural killer cell differentiation	0	0	0.643717	0.722342
GO:0048549~positive regulation of pinocytosis	0	0	0.214572	0.589004
GO:2000669~negative regulation of dendritic cell apoptotic process	0	0	0.160929	0.568359
GO:0060068~vagina development	0	0	0.482788	0.678343
GO:0070528~protein kinase C signaling	0	0	0.858289	0.7718
GO:0019882~antigen processing and presentation	0	0	2.95037	0.966382
GO:0035584~calcium-mediated signaling using intracellular calcium source	1.86417	2	1.07286	0.157743
GO:0045123~cellular extravasation	0	0	0.214572	0.589004
GO:0002480~antigen processing and presentation of exogenous peptide antigen via MHC class I, TAP-independent	0	0	0.482788	0.678343
GO:0006637~acyl-CoA metabolic process	1.6947	2	1.18015	0.184598
GO:0019530~taurine metabolic process	0	0	0.268215	0.608663
GO:0071316~cellular response to nicotine	2.33022	1	0.429145	0.188574
GO:0033280~response to vitamin D	1.03565	1	0.965576	0.399033
GO:0043280~positive regulation of cysteine-type endopeptidase activity involved in apoptotic process	0.932086	2	2.14572	0.437777
GO:0060154~cellular process regulating host cell cycle in response to virus	0	0	0.160929	0.568359
GO:0034201~response to oleic acid	0	0	0.160929	0.568359
GO:0097202~activation of cysteine-type endopeptidase activity	0	0	0.590074	0.708387
GO:0045732~positive regulation of protein catabolic process	0.621391	2	3.21859	0.670302
GO:0017187~peptidyl-glutamic acid carboxylation	1.6947	1	0.590074	0.255575
GO:0033574~response to testosterone	1.24278	2	1.60929	0.297547
GO:0016322~neuron remodeling	0	0	0.536431	0.693733
GO:0051881~regulation of mitochondrial membrane potential	0	0	1.50201	0.873349
GO:0048705~skeletal system morphogenesis	0.582554	1	1.71658	0.624281
GO:0043496~regulation of protein homodimerization activity	2.6631	1	0.375502	0.165639
GO:1900103~positive regulation of endoplasmic reticulum unfolded protein response	0	0	0.268215	0.608663
GO:0032976~release of matrix enzymes from mitochondria	0	0	0.0536431	0.52391
GO:0051281~positive regulation of release of sequestered calcium ion into cytosol	0.690434	1	1.44836	0.553285
GO:0002358~B cell homeostatic proliferation	0	0	0.107286	0.546678
GO:0043653~mitochondrial fragmentation involved in apoptotic process	0	0	0.482788	0.678343
GO:0048678~response to axon injury	1.38087	2	1.44836	0.254619
GO:0033599~regulation of mammary gland epithelial cell proliferation	0	0	0.268215	0.608663
GO:0031018~endocrine pancreas development	0	0	1.39472	0.860287
GO:0001782~B cell homeostasis	1.03565	1	0.965576	0.399033
GO:0010524~positive regulation of calcium ion transport into cytosol	1.55348	1	0.643717	0.277233
GO:0051216~cartilage development	1.57981	5	3.16494	0.106317
GO:0007288~sperm axoneme assembly	2.33022	1	0.429145	0.188574
GO:0038108~negative regulation of appetite by leptin-mediated signaling pathway	0	0	0.214572	0.589004
GO:1903546~protein localization to photoreceptor outer segment	0	0	0.375502	0.645207
GO:0003085~negative regulation of systemic arterial blood pressure	0	0	0.375502	0.645207
GO:0034454~microtubule anchoring at centrosome	0	0	0.321859	0.627382
GO:0008630~intrinsic apoptotic signaling pathway in response to DNA damage	0.793265	2	2.52123	0.528102
GO:0030318~melanocyte differentiation	3.72835	4	1.07286	0.00786277
GO:0007569~cell aging	0	0	1.34108	0.853259
GO:0033689~negative regulation of osteoblast proliferation	2.33022	1	0.429145	0.188574
GO:0048041~focal adhesion assembly	0.776739	1	1.28743	0.505721
GO:0032835~glomerulus development	2.0713	1	0.482788	0.211225
GO:0043583~ear development	2.0713	1	0.482788	0.211225
GO:0022612~gland morphogenesis	0	0	0.429145	0.662181
GO:1902230~negative regulation of intrinsic apoptotic signaling pathway in response to DNA damage	0	0	0.751003	0.748281
GO:2001240~negative regulation of extrinsic apoptotic signaling pathway in absence of ligand	1.51149	3	1.98479	0.179157
GO:0071480~cellular response to gamma radiation	0	0	1.1265	0.821436
GO:0002268~follicular dendritic cell differentiation	0	0	0.107286	0.546678
GO:1904837~beta-catenin-TCF complex assembly	0.867057	2	2.30665	0.477523
GO:0071482~cellular response to light stimulus	0	0	0.643717	0.722342
GO:0048008~platelet-derived growth factor receptor signaling pathway	0.642818	1	1.55565	0.582901
GO:0050885~neuromuscular process controlling balance	1.21576	3	2.46758	0.277485
GO:0060313~negative regulation of blood vessel remodeling	0	0	0.160929	0.568359
GO:0046951~ketone body biosynthetic process	2.33022	1	0.429145	0.188574
GO:0046952~ketone body catabolic process	0	0	0.214572	0.589004
GO:0007205~protein kinase C-activating G-protein coupled receptor signaling pathway	1.20269	2	1.66294	0.311871
GO:0050764~regulation of phagocytosis	2.0713	1	0.482788	0.211225
GO:0050853~B cell receptor signaling pathway	0.345217	1	2.89673	0.83329
GO:0030853~negative regulation of granulocyte differentiation	0	0	0.429145	0.662181
GO:0072757~cellular response to camptothecin	4.66043	1	0.214572	0.095428
GO:0038016~insulin receptor internalization	0	0	0.107286	0.546678
GO:0042058~regulation of epidermal growth factor receptor signaling pathway	0	0	0.429145	0.662181
GO:0032692~negative regulation of interleukin-1 production	0	0	0.160929	0.568359
GO:1903385~regulation of homophilic cell adhesion	6.21391	1	0.160929	0.0716761
GO:0044319~wound healing, spreading of cells	0	0	0.643717	0.722342
GO:0071267~L-methionine salvage	0	0	0.107286	0.546678
GO:0072393~microtubule anchoring at microtubule organizing center	9.32086	1	0.107286	0.0478204
GO:0001763~morphogenesis of a branching structure	0	0	0.429145	0.662181
GO:0032823~regulation of natural killer cell differentiation	0	0	0.107286	0.546678
GO:0000732~strand displacement	0	0	1.39472	0.860287
GO:0043418~homocysteine catabolic process	0	0	0.214572	0.589004
GO:0043408~regulation of MAPK cascade	1.81871	4	2.19937	0.0878293
GO:0030595~leukocyte chemotaxis	0	0	0.643717	0.722342
GO:0042113~B cell activation	0.642818	1	1.55565	0.582901
GO:0042167~heme catabolic process	0	0	0.375502	0.645207
GO:0007379~segment specification	0	0	0.429145	0.662181
GO:0022617~extracellular matrix disassembly	0.981144	4	4.07687	0.396903
GO:0060804~positive regulation of Wnt signaling pathway by BMP signaling pathway	18.6417	1	0.0536431	0.0239102
GO:0072138~mesenchymal cell proliferation involved in ureteric bud development	6.21391	1	0.160929	0.0716761
GO:0045778~positive regulation of ossification	3.10695	2	0.643717	0.0635587
GO:2000065~negative regulation of cortisol biosynthetic process	9.32086	2	0.214572	0.0066343
GO:0048468~cell development	1.86417	4	2.14572	0.0816637
GO:0061312~BMP signaling pathway involved in heart development	0	0	0.321859	0.627382
GO:0035993~deltoid tuberosity development	0	0	0.160929	0.568359
GO:0060503~bud dilation involved in lung branching	0	0	0.0536431	0.52391
GO:0060438~trachea development	0	0	0.160929	0.568359
GO:0003150~muscular septum morphogenesis	3.10695	1	0.321859	0.142447
GO:0060197~cloacal septation	0	0	0.160929	0.568359
GO:0070244~negative regulation of thymocyte apoptotic process	0	0	0.429145	0.662181
GO:0035116~embryonic hindlimb morphogenesis	1.99733	3	1.50201	0.0952819
GO:0033085~negative regulation of T cell differentiation in thymus	0	0	0.268215	0.608663
GO:0021904~dorsal/ventral neural tube patterning	0	0	0.590074	0.708387
GO:0007281~germ cell development	1.24278	2	1.60929	0.297547
GO:0043407~negative regulation of MAP kinase activity	0.517826	1	1.93115	0.674029
GO:0002320~lymphoid progenitor cell differentiation	3.10695	1	0.321859	0.142447
GO:0060113~inner ear receptor cell differentiation	0	0	0.214572	0.589004
GO:0034116~positive regulation of heterotypic cell-cell adhesion	0	0	0.590074	0.708387
GO:0060592~mammary gland formation	0	0	0.0536431	0.52391
GO:0060235~lens induction in camera-type eye	0	0	0.214572	0.589004
GO:0021983~pituitary gland development	1.33155	2	1.50201	0.2689
GO:1900006~positive regulation of dendrite development	0	0	0.858289	0.7718
GO:1905069~allantois development	0	0	0.107286	0.546678
GO:0048754~branching morphogenesis of an epithelial tube	1.62102	2	1.23379	0.198331
GO:0048596~embryonic camera-type eye morphogenesis	1.55348	1	0.643717	0.277233
GO:0030166~proteoglycan biosynthetic process	1.55348	1	0.643717	0.277233
GO:0048842~positive regulation of axon extension involved in axon guidance	0	0	0.375502	0.645207
GO:0003151~outflow tract morphogenesis	1.21576	3	2.46758	0.277485
GO:0003222~ventricular trabecula myocardium morphogenesis	1.16511	1	0.858289	0.360057
GO:0010665~regulation of cardiac muscle cell apoptotic process	0	0	0.107286	0.546678
GO:0035912~dorsal aorta morphogenesis	0	0	0.429145	0.662181
GO:0048589~developmental growth	0.745669	1	1.34108	0.522
GO:0014912~negative regulation of smooth muscle cell migration	2.6631	2	0.751003	0.0845083
GO:0014032~neural crest cell development	7.1699	5	0.69736	0.000122779
GO:0003181~atrioventricular valve morphogenesis	1.6947	1	0.590074	0.255575
GO:0051149~positive regulation of muscle cell differentiation	3.88369	5	1.28743	0.00283336
GO:0031581~hemidesmosome assembly	0	0	0.643717	0.722342
GO:0072577~endothelial cell apoptotic process	0	0	0.375502	0.645207
GO:0051146~striated muscle cell differentiation	3.72835	2	0.536431	0.0449102
GO:0001824~blastocyst development	0	0	0.911933	0.782723
GO:0008219~cell death	1.91197	4	2.09208	0.0757262
GO:0071279~cellular response to cobalt ion	0	0	0.160929	0.568359
GO:0046902~regulation of mitochondrial membrane permeability	0	0	0.536431	0.693733
GO:0051402~neuron apoptotic process	0.564901	1	1.77022	0.637286
GO:0072332~intrinsic apoptotic signaling pathway by p53 class mediator	1.38087	2	1.44836	0.254619
GO:0030011~maintenance of cell polarity	0	0	0.268215	0.608663
GO:0042703~menstruation	0	0	0.0536431	0.52391
GO:0031989~bombesin receptor signaling pathway	0	0	0.107286	0.546678
GO:0043031~negative regulation of macrophage activation	0	0	0.375502	0.645207
GO:0007141~male meiosis I	0	0	0.965576	0.793124
GO:0006289~nucleotide-excision repair	0	0	2.19937	0.933108
GO:0007178~transmembrane receptor protein serine/threonine kinase signaling pathway	0	0	0.911933	0.782723
GO:0051574~positive regulation of histone H3-K9 methylation	3.10695	1	0.321859	0.142447
GO:0030878~thyroid gland development	0	0	1.34108	0.853259
GO:0071277~cellular response to calcium ion	1.09657	3	2.7358	0.334795
GO:0010764~negative regulation of fibroblast migration	0	0	0.429145	0.662181
GO:0014065~phosphatidylinositol 3-kinase signaling	2.0713	3	1.44836	0.0872902
GO:0045647~negative regulation of erythrocyte differentiation	0	0	0.482788	0.678343
GO:0071385~cellular response to glucocorticoid stimulus	2.79626	3	1.07286	0.0406981
GO:0006633~fatty acid biosynthetic process	0.71699	2	2.78944	0.586965
GO:0044344~cellular response to fibroblast growth factor stimulus	1.24278	2	1.60929	0.297547
GO:0030449~regulation of complement activation	1.24278	2	1.60929	0.297547
GO:0006303~double-strand break repair via nonhomologous end joining	0.591801	2	3.37951	0.698067
GO:0009048~dosage compensation by inactivation of X chromosome	0	0	0.214572	0.589004
GO:2000620~positive regulation of histone H4-K16 acetylation	0	0	0.107286	0.546678
GO:0007597~blood coagulation, intrinsic pathway	0	0	0.965576	0.793124
GO:0006957~complement activation, alternative pathway	1.43398	1	0.69736	0.298524
GO:0019835~cytolysis	0	0	1.1265	0.821436
GO:0034614~cellular response to reactive oxygen species	0.932086	1	1.07286	0.436314
GO:0000462~maturation of SSU-rRNA from tricistronic rRNA transcript (SSU-rRNA, 5.8S rRNA, LSU-rRNA)	0.582554	1	1.71658	0.624281
GO:2000145~regulation of cell motility	1.33155	2	1.50201	0.2689
GO:0045597~positive regulation of cell differentiation	0.503831	1	1.98479	0.685544
GO:0097067~cellular response to thyroid hormone stimulus	3.10695	2	0.643717	0.0635587
GO:0071407~cellular response to organic cyclic compound	0.947885	3	3.16494	0.42622
GO:2000271~positive regulation of fibroblast apoptotic process	3.10695	1	0.321859	0.142447
GO:0045603~positive regulation of endothelial cell differentiation	1.6947	1	0.590074	0.255575
GO:0034501~protein localization to kinetochore	0	0	0.536431	0.693733
GO:0001829~trophectodermal cell differentiation	0	0	0.69736	0.735629
GO:0048266~behavioral response to pain	0	0	0.590074	0.708387
GO:0010266~response to vitamin B1	0	0	0.107286	0.546678
GO:1903579~negative regulation of ATP metabolic process	0	0	0.0536431	0.52391
GO:0051928~positive regulation of calcium ion transport	0	0	1.39472	0.860287
GO:0042256~mature ribosome assembly	0	0	0.321859	0.627382
GO:0051897~positive regulation of protein kinase B signaling	0.443851	2	4.50602	0.843833
GO:0039534~negative regulation of MDA-5 signaling pathway	0	0	0.160929	0.568359
GO:0006956~complement activation	0.214273	1	4.66695	0.955502
GO:0060326~cell chemotaxis	1.14718	4	3.4868	0.28833
GO:1903027~regulation of opsonization	0	0	0.107286	0.546678
GO:0010575~positive regulation of vascular endothelial growth factor production	2.0713	3	1.44836	0.0872902
GO:0021534~cell proliferation in hindbrain	0	0	0.0536431	0.52391
GO:0038063~collagen-activated tyrosine kinase receptor signaling pathway	0	0	0.321859	0.627382
GO:0001952~regulation of cell-matrix adhesion	0	0	0.536431	0.693733
GO:0017144~drug metabolic process	0	0	1.44836	0.866978
GO:0051414~response to cortisol	4.66043	1	0.214572	0.095428
GO:0014075~response to amine	0	0	0.590074	0.708387
GO:0032849~positive regulation of cellular pH reduction	0	0	0.214572	0.589004
GO:0014003~oligodendrocyte development	0.81051	1	1.23379	0.489015
GO:0071926~endocannabinoid signaling pathway	0	0	0.0536431	0.52391
GO:1902254~negative regulation of intrinsic apoptotic signaling pathway by p53 class mediator	0	0	0.268215	0.608663
GO:0006730~one-carbon metabolic process	0	0	1.60929	0.885192
GO:0017158~regulation of calcium ion-dependent exocytosis	2.13048	4	1.87751	0.0543276
GO:0014056~regulation of acetylcholine secretion, neurotransmission	0	0	0.107286	0.546678
GO:0061577~calcium ion transmembrane transport via high voltage-gated calcium channel	0	0	0.160929	0.568359
GO:0043010~camera-type eye development	2.33022	5	2.14572	0.0259783
GO:0060372~regulation of atrial cardiac muscle cell membrane repolarization	0	0	0.321859	0.627382
GO:0007188~adenylate cyclase-modulating G-protein coupled receptor signaling pathway	2.01532	4	1.98479	0.0645507
GO:0050908~detection of light stimulus involved in visual perception	3.28972	3	0.911933	0.0261971
GO:0010842~retina layer formation	4.23676	5	1.18015	0.00187399
GO:0072205~metanephric collecting duct development	0	0	0.375502	0.645207
GO:0045651~positive regulation of macrophage differentiation	1.43398	1	0.69736	0.298524
GO:0045671~negative regulation of osteoclast differentiation	1.55348	2	1.28743	0.212227
GO:0019731~antibacterial humoral response	0.423676	1	2.3603	0.756644
GO:0071354~cellular response to interleukin-6	0	0	0.751003	0.748281
GO:0044130~negative regulation of growth of symbiont in host	0	0	0.858289	0.7718
GO:0048863~stem cell differentiation	2.0713	3	1.44836	0.0872902
GO:0048701~embryonic cranial skeleton morphogenesis	2.40538	4	1.66294	0.0367926
GO:0030316~osteoclast differentiation	0.81051	1	1.23379	0.489015
GO:0030819~positive regulation of cAMP biosynthetic process	1.39813	3	2.14572	0.210823
GO:1901844~regulation of cell communication by electrical coupling involved in cardiac conduction	0	0	0.429145	0.662181
GO:0032465~regulation of cytokinesis	0.847351	1	1.18015	0.471879
GO:0010880~regulation of release of sequestered calcium ion into cytosol by sarcoplasmic reticulum	0	0	0.965576	0.793124
GO:1901841~regulation of high voltage-gated calcium channel activity	2.6631	1	0.375502	0.165639
GO:0035307~positive regulation of protein dephosphorylation	0.887701	1	1.1265	0.454312
GO:0010801~negative regulation of peptidyl-threonine phosphorylation	0	0	0.751003	0.748281
GO:0051603~proteolysis involved in cellular protein catabolic process	0.776739	2	2.57487	0.540276
GO:1900026~positive regulation of substrate adhesion-dependent cell spreading	0.582554	1	1.71658	0.624281
GO:0033081~regulation of T cell differentiation in thymus	0	0	0.268215	0.608663
GO:0007616~long-term memory	0.665776	1	1.50201	0.5683
GO:1900034~regulation of cellular response to heat	0.248556	1	4.02323	0.927304
GO:0071803~positive regulation of podosome assembly	0	0	0.536431	0.693733
GO:0032801~receptor catabolic process	1.55348	1	0.643717	0.277233
GO:0051493~regulation of cytoskeleton organization	1.96229	2	1.01922	0.144685
GO:0016540~protein autoprocessing	0	0	0.69736	0.735629
GO:0014718~positive regulation of satellite cell activation involved in skeletal muscle regeneration	0	0	0.107286	0.546678
GO:1901725~regulation of histone deacetylase activity	0	0	0.0536431	0.52391
GO:0006423~cysteinyl-tRNA aminoacylation	0	0	0.107286	0.546678
GO:0009749~response to glucose	1.09657	4	3.64773	0.317706
GO:0086003~cardiac muscle cell contraction	0	0	0.107286	0.546678
GO:0002026~regulation of the force of heart contraction	0.981144	1	1.01922	0.417887
GO:1902306~negative regulation of sodium ion transmembrane transport	0	0	0.160929	0.568359
GO:0051016~barbed-end actin filament capping	0	0	0.751003	0.748281
GO:0097300~programmed necrotic cell death	0	0	0.214572	0.589004
GO:0097192~extrinsic apoptotic signaling pathway in absence of ligand	0.548286	1	1.82387	0.649908
GO:0034349~glial cell apoptotic process	0	0	0.268215	0.608663
GO:0032025~response to cobalt ion	0	0	0.321859	0.627382
GO:0051291~protein heterooligomerization	0.278235	1	3.59409	0.899783
GO:0050718~positive regulation of interleukin-1 beta secretion	0	0	1.18015	0.829986
GO:0043124~negative regulation of I-kappaB kinase/NF-kappaB signaling	0.932086	2	2.14572	0.437777
GO:0030220~platelet formation	0.981144	1	1.01922	0.417887
GO:0010033~response to organic substance	0	0	1.50201	0.873349
GO:0071313~cellular response to caffeine	2.33022	1	0.429145	0.188574
GO:0010193~response to ozone	4.66043	1	0.214572	0.095428
GO:0033197~response to vitamin E	1.6947	1	0.590074	0.255575
GO:1900085~negative regulation of peptidyl-tyrosine autophosphorylation	0	0	0.0536431	0.52391
GO:0009617~response to bacterium	0	0	1.23379	0.838127
GO:0030512~negative regulation of transforming growth factor beta receptor signaling pathway	0.291277	1	3.43316	0.887125
GO:0042542~response to hydrogen peroxide	0.365524	1	2.7358	0.813006
GO:0008203~cholesterol metabolic process	0.274143	1	3.64773	0.903696
GO:1903598~positive regulation of gap junction assembly	0	0	0.160929	0.568359
GO:0032091~negative regulation of protein binding	0.654096	2	3.05766	0.640641
GO:0030301~cholesterol transport	2.33022	2	0.858289	0.107405
GO:0042524~negative regulation of tyrosine phosphorylation of Stat5 protein	0	0	0.160929	0.568359
GO:0003057~regulation of the force of heart contraction by chemical signal	0	0	0.107286	0.546678
GO:0043409~negative regulation of MAPK cascade	0	0	0.751003	0.748281
GO:0019065~receptor-mediated endocytosis of virus by host cell	0	0	0.160929	0.568359
GO:0048741~skeletal muscle fiber development	1.33155	2	1.50201	0.2689
GO:0016050~vesicle organization	1.33155	2	1.50201	0.2689
GO:0007088~regulation of mitotic nuclear division	0	0	1.28743	0.845878
GO:0098909~regulation of cardiac muscle cell action potential involved in regulation of contraction	0	0	0.429145	0.662181
GO:0001933~negative regulation of protein phosphorylation	1.52801	5	3.27223	0.118399
GO:0007009~plasma membrane organization	0	0	0.69736	0.735629
GO:0010831~positive regulation of myotube differentiation	0	0	0.482788	0.678343
GO:0010614~negative regulation of cardiac muscle hypertrophy	0	0	0.375502	0.645207
GO:0002027~regulation of heart rate	1.1298	2	1.77022	0.340429
GO:0045595~regulation of cell differentiation	1.16511	2	1.71658	0.326171
GO:0007265~Ras protein signal transduction	1.06524	4	3.75502	0.337456
GO:1990314~cellular response to insulin-like growth factor stimulus	0	0	0.268215	0.608663
GO:0033129~positive regulation of histone phosphorylation	2.33022	1	0.429145	0.188574
GO:0007077~mitotic nuclear envelope disassembly	0	0	2.3603	0.942274
GO:0019343~cysteine biosynthetic process via cystathionine	0	0	0.160929	0.568359
GO:0050667~homocysteine metabolic process	0	0	0.375502	0.645207
GO:0038188~cholecystokinin signaling pathway	9.32086	1	0.107286	0.0478204
GO:0001696~gastric acid secretion	3.10695	1	0.321859	0.142447
GO:0045742~positive regulation of epidermal growth factor receptor signaling pathway	0.776739	1	1.28743	0.505721
GO:0090650~cellular response to oxygen-glucose deprivation	0	0	0.160929	0.568359
GO:0008652~cellular amino acid biosynthetic process	0.71699	1	1.39472	0.537853
GO:0032099~negative regulation of appetite	0	0	0.429145	0.662181
GO:0001937~negative regulation of endothelial cell proliferation	2.57127	4	1.55565	0.0294818
GO:1904874~positive regulation of telomerase RNA localization to Cajal body	1.24278	1	0.804646	0.339946
GO:0000083~regulation of transcription involved in G1/S transition of mitotic cell cycle	0.81051	1	1.23379	0.489015
GO:0000075~cell cycle checkpoint	0	0	0.482788	0.678343
GO:0007167~enzyme linked receptor protein signaling pathway	0	0	0.482788	0.678343
GO:0045058~T cell selection	0	0	0.160929	0.568359
GO:0008037~cell recognition	1.6947	2	1.18015	0.184598
GO:0048007~antigen processing and presentation, exogenous lipid antigen via MHC class Ib	0	0	0.375502	0.645207
GO:0007163~establishment or maintenance of cell polarity	0.642818	1	1.55565	0.582901
GO:0050850~positive regulation of calcium-mediated signaling	0	0	1.07286	0.812457
GO:0030101~natural killer cell activation	0	0	1.07286	0.812457
GO:0002669~positive regulation of T cell anergy	0	0	0.107286	0.546678
GO:0031295~T cell costimulation	0	0	4.18416	0.989157
GO:0071404~cellular response to low-density lipoprotein particle stimulus	0	0	0.482788	0.678343
GO:0042089~cytokine biosynthetic process	4.66043	1	0.214572	0.095428
GO:0016339~calcium-dependent cell-cell adhesion via plasma membrane cell adhesion molecules	1.33155	2	1.50201	0.2689
GO:0048514~blood vessel morphogenesis	2.19314	2	0.911933	0.119479
GO:0031663~lipopolysaccharide-mediated signaling pathway	0	0	1.71658	0.895929
GO:0009408~response to heat	0	0	2.57487	0.952575
GO:0097190~apoptotic signaling pathway	1.05024	4	3.80866	0.34736
GO:0060563~neuroepithelial cell differentiation	5.32621	2	0.375502	0.0220809
GO:1900168~positive regulation of glial cell-derived neurotrophic factor secretion	0	0	0.107286	0.546678
GO:0048870~cell motility	0.776739	1	1.28743	0.505721
GO:1901215~negative regulation of neuron death	0.466043	1	2.14572	0.717989
GO:0010899~regulation of phosphatidylcholine catabolic process	0	0	0.107286	0.546678
GO:0008588~release of cytoplasmic sequestered NF-kappaB	0	0	0.268215	0.608663
GO:0045579~positive regulation of B cell differentiation	0	0	0.751003	0.748281
GO:0045556~positive regulation of TRAIL biosynthetic process	0	0	0.0536431	0.52391
GO:0045019~negative regulation of nitric oxide biosynthetic process	1.43398	1	0.69736	0.298524
GO:0060290~transdifferentiation	5.32621	2	0.375502	0.0220809
GO:1900038~negative regulation of cellular response to hypoxia	0	0	0.0536431	0.52391
GO:1900035~negative regulation of cellular response to heat	0	0	0.0536431	0.52391
GO:0061042~vascular wound healing	0	0	0.268215	0.608663
GO:0034383~low-density lipoprotein particle clearance	2.33022	1	0.429145	0.188574
GO:0048304~positive regulation of isotype switching to IgG isotypes	0	0	0.429145	0.662181
GO:0035461~vitamin transmembrane transport	4.66043	1	0.214572	0.095428
GO:0070542~response to fatty acid	0	0	0.911933	0.782723
GO:0071726~cellular response to diacyl bacterial lipopeptide	0	0	0.214572	0.589004
GO:0044539~long-chain fatty acid import	0	0	0.375502	0.645207
GO:0042953~lipoprotein transport	2.48556	2	0.804646	0.0957344
GO:0051084~'de novo' posttranslational protein folding	0	0	0.321859	0.627382
GO:0043491~protein kinase B signaling	0.564901	1	1.77022	0.637286
GO:0042832~defense response to protozoan	0	0	1.01922	0.803027
GO:0034613~cellular protein localization	1.30059	3	2.30665	0.243718
GO:1900625~positive regulation of monocyte aggregation	0	0	0.160929	0.568359
GO:0060333~interferon-gamma-mediated signaling pathway	0.525119	2	3.80866	0.763147
GO:0035646~endosome to melanosome transport	0	0	0.536431	0.693733
GO:0071310~cellular response to organic substance	1.09657	1	0.911933	0.379754
GO:0043518~negative regulation of DNA damage response, signal transduction by p53 class mediator	1.43398	1	0.69736	0.298524
GO:0061462~protein localization to lysosome	0	0	0.268215	0.608663
GO:0051437~positive regulation of ubiquitin-protein ligase activity involved in regulation of mitotic cell cycle transition	0.245286	1	4.07687	0.930189
GO:0051436~negative regulation of ubiquitin-protein ligase activity involved in mitotic cell cycle	0.26256	1	3.80866	0.914588
GO:0051439~regulation of ubiquitin-protein ligase activity involved in mitotic cell cycle	0	0	1.23379	0.838127
GO:0019858~cytosine metabolic process	0	0	0.160929	0.568359
GO:0045980~negative regulation of nucleotide metabolic process	0	0	0.0536431	0.52391
GO:0014823~response to activity	1.73411	4	2.30665	0.100827
GO:0045931~positive regulation of mitotic cell cycle	0	0	1.50201	0.873349
GO:0072422~signal transduction involved in DNA damage checkpoint	0	0	0.107286	0.546678
GO:1902857~positive regulation of nonmotile primary cilium assembly	0	0	0.321859	0.627382
GO:1904385~cellular response to angiotensin	3.72835	1	0.268215	0.119032
GO:0050773~regulation of dendrite development	0	0	0.429145	0.662181
GO:1904668~positive regulation of ubiquitin protein ligase activity	2.0713	1	0.482788	0.211225
GO:0031145~anaphase-promoting complex-dependent catabolic process	0.235971	1	4.2378	0.938205
GO:0019233~sensory perception of pain	1.07548	3	2.78944	0.34631
GO:0007097~nuclear migration	0	0	0.482788	0.678343
GO:0043497~regulation of protein heterodimerization activity	2.33022	1	0.429145	0.188574
GO:0032912~negative regulation of transforming growth factor beta2 production	0	0	0.107286	0.546678
GO:0033136~serine phosphorylation of STAT3 protein	0	0	0.214572	0.589004
GO:0030517~negative regulation of axon extension	3.38941	2	0.590074	0.0539238
GO:0061001~regulation of dendritic spine morphogenesis	0	0	0.536431	0.693733
GO:0030219~megakaryocyte differentiation	0	0	0.375502	0.645207
GO:0043616~keratinocyte proliferation	0	0	0.643717	0.722342
GO:0030511~positive regulation of transforming growth factor beta receptor signaling pathway	1.55348	2	1.28743	0.212227
GO:0045736~negative regulation of cyclin-dependent protein serine/threonine kinase activity	1.6947	2	1.18015	0.184598
GO:0000079~regulation of cyclin-dependent protein serine/threonine kinase activity	1.43398	3	2.09208	0.200113
GO:0090399~replicative senescence	1.55348	1	0.643717	0.277233
GO:1904706~negative regulation of vascular smooth muscle cell proliferation	0	0	0.429145	0.662181
GO:0051271~negative regulation of cellular component movement	3.10695	1	0.321859	0.142447
GO:0042326~negative regulation of phosphorylation	1.86417	2	1.07286	0.157743
GO:0048102~autophagic cell death	0	0	0.375502	0.645207
GO:0071514~genetic imprinting	0	0	0.214572	0.589004
GO:0060770~negative regulation of epithelial cell proliferation involved in prostate gland development	0	0	0.321859	0.627382
GO:0034393~positive regulation of smooth muscle cell apoptotic process	0	0	0.482788	0.678343
GO:0035986~senescence-associated heterochromatin focus assembly	0	0	0.160929	0.568359
GO:2000111~positive regulation of macrophage apoptotic process	6.21391	1	0.160929	0.0716761
GO:0007005~mitochondrion organization	0.2421	1	4.13052	0.932965
GO:0045945~positive regulation of transcription from RNA polymerase III promoter	1.6947	1	0.590074	0.255575
GO:0001892~embryonic placenta development	1.86417	2	1.07286	0.157743
GO:0051591~response to cAMP	0	0	2.46758	0.947677
GO:0034109~homotypic cell-cell adhesion	3.10695	1	0.321859	0.142447
GO:0045078~positive regulation of interferon-gamma biosynthetic process	0	0	0.643717	0.722342
GO:0051315~attachment of mitotic spindle microtubules to kinetochore	2.33022	1	0.429145	0.188574
GO:0033762~response to glucagon	0	0	0.536431	0.693733
GO:0000097~sulfur amino acid biosynthetic process	0	0	0.0536431	0.52391
GO:0042412~taurine biosynthetic process	0	0	0.107286	0.546678
GO:0060575~intestinal epithelial cell differentiation	2.6631	1	0.375502	0.165639
GO:0060711~labyrinthine layer development	0	0	0.482788	0.678343
GO:0045670~regulation of osteoclast differentiation	3.10695	2	0.643717	0.0635587
GO:0032753~positive regulation of interleukin-4 production	0	0	1.07286	0.812457
GO:0035711~T-helper 1 cell activation	0	0	0.107286	0.546678
GO:0072574~hepatocyte proliferation	0	0	0.214572	0.589004
GO:0043388~positive regulation of DNA binding	0	0	1.50201	0.873349
GO:0043353~enucleate erythrocyte differentiation	0	0	0.268215	0.608663
GO:0050804~modulation of synaptic transmission	1.09657	1	0.911933	0.379754
GO:0016049~cell growth	1.33155	4	3.00401	0.203878
GO:0034080~CENP-A containing nucleosome assembly	1.73411	4	2.30665	0.100827
GO:0000070~mitotic sister chromatid segregation	0.745669	1	1.34108	0.522
GO:0007098~centrosome cycle	3.10695	1	0.321859	0.142447
GO:0033364~mast cell secretory granule organization	0	0	0.107286	0.546678
GO:0007207~phospholipase C-activating G-protein coupled acetylcholine receptor signaling pathway	0	0	0.429145	0.662181
GO:0046541~saliva secretion	0	0	0.268215	0.608663
GO:0034372~very-low-density lipoprotein particle remodeling	0	0	0.375502	0.645207
GO:0015914~phospholipid transport	0	0	1.34108	0.853259
GO:0006338~chromatin remodeling	0.867057	4	4.61331	0.493799
GO:0016575~histone deacetylation	0.81051	2	2.46758	0.515735
GO:0007099~centriole replication	0	0	0.858289	0.7718
GO:0022604~regulation of cell morphogenesis	0	0	1.34108	0.853259
GO:0045214~sarcomere organization	0.642818	1	1.55565	0.582901
GO:0030836~positive regulation of actin filament depolymerization	0	0	0.429145	0.662181
GO:0030042~actin filament depolymerization	0	0	0.429145	0.662181
GO:2001235~positive regulation of apoptotic signaling pathway	2.98268	4	1.34108	0.0176922
GO:0006590~thyroid hormone generation	1.55348	1	0.643717	0.277233
GO:0032275~luteinizing hormone secretion	0	0	0.214572	0.589004
GO:0007059~chromosome segregation	1.09657	4	3.64773	0.317706
GO:0072553~terminal button organization	0	0	0.214572	0.589004
GO:0008202~steroid metabolic process	0.433529	1	2.30665	0.747451
GO:0002551~mast cell chemotaxis	3.72835	1	0.268215	0.119032
GO:0006580~ethanolamine metabolic process	0	0	0.0536431	0.52391
GO:0009636~response to toxic substance	1.09657	5	4.55966	0.30252
GO:0046314~phosphocreatine biosynthetic process	0	0	0.0536431	0.52391
GO:0031572~G2 DNA damage checkpoint	0	0	1.07286	0.812457
GO:2000707~positive regulation of dense core granule biogenesis	0	0	0.107286	0.546678
GO:0045908~negative regulation of vasodilation	0	0	0.321859	0.627382
GO:0009612~response to mechanical stimulus	1.26385	4	3.16494	0.231208
GO:0006032~chitin catabolic process	0	0	0.375502	0.645207
GO:0003056~regulation of vascular smooth muscle contraction	0	0	0.214572	0.589004
GO:0007274~neuromuscular synaptic transmission	0.71699	1	1.39472	0.537853
GO:0007271~synaptic transmission, cholinergic	0.503831	1	1.98479	0.685544
GO:0048149~behavioral response to ethanol	0	0	0.590074	0.708387
GO:0095500~acetylcholine receptor signaling pathway	0	0	0.214572	0.589004
GO:0060084~synaptic transmission involved in micturition	0	0	0.160929	0.568359
GO:0060304~regulation of phosphatidylinositol dephosphorylation	0	0	0.0536431	0.52391
GO:0014059~regulation of dopamine secretion	2.86796	2	0.69736	0.0737686
GO:0098655~cation transmembrane transport	0.388369	1	2.57487	0.790487
GO:0035094~response to nicotine	1.00766	2	1.98479	0.396716
GO:0048255~mRNA stabilization	2.48556	2	0.804646	0.0957344
GO:1903959~regulation of anion transmembrane transport	1.09657	1	0.911933	0.379754
GO:0006940~regulation of smooth muscle contraction	0	0	0.858289	0.7718
GO:0050881~musculoskeletal movement	0	0	0.214572	0.589004
GO:1900118~negative regulation of execution phase of apoptosis	3.10695	1	0.321859	0.142447
GO:0008089~anterograde axonal transport	1.43398	2	1.39472	0.240397
GO:0000902~cell morphogenesis	1.50337	5	3.32587	0.124678
GO:0044772~mitotic cell cycle phase transition	4.66043	1	0.214572	0.095428
GO:0045737~positive regulation of cyclin-dependent protein serine/threonine kinase activity	0	0	1.28743	0.845878
GO:0007018~microtubule-based movement	0.46029	2	4.34509	0.827702
GO:0002724~regulation of T cell cytokine production	0	0	0.107286	0.546678
GO:0006678~glucosylceramide metabolic process	0	0	0.107286	0.546678
GO:0045600~positive regulation of fat cell differentiation	1.98316	5	2.52123	0.048164
GO:0043484~regulation of RNA splicing	0.642818	1	1.55565	0.582901
GO:0007040~lysosome organization	1.03565	2	1.93115	0.382785
GO:0016242~negative regulation of macroautophagy	1.86417	1	0.536431	0.233566
GO:0000387~spliceosomal snRNP assembly	1.33155	2	1.50201	0.2689
GO:0001523~retinoid metabolic process	0.916806	3	3.27223	0.448575
GO:0042059~negative regulation of epidermal growth factor receptor signaling pathway	1.03565	2	1.93115	0.382785
GO:0060236~regulation of mitotic spindle organization	0	0	0.429145	0.662181
GO:0032695~negative regulation of interleukin-12 production	0	0	0.643717	0.722342
GO:0050728~negative regulation of inflammatory response	0.471943	2	4.2378	0.816161
GO:0072676~lymphocyte migration	0	0	0.214572	0.589004
GO:0051491~positive regulation of filopodium assembly	2.15097	3	1.39472	0.0796113
GO:2000526~positive regulation of glycoprotein biosynthetic process involved in immunological synapse formation	0	0	0.0536431	0.52391
GO:0050862~positive regulation of T cell receptor signaling pathway	0	0	0.429145	0.662181
GO:0035845~photoreceptor cell outer segment organization	2.0713	1	0.482788	0.211225
GO:0032229~negative regulation of synaptic transmission, GABAergic	0	0	0.321859	0.627382
GO:0002507~tolerance induction	0	0	0.0536431	0.52391
GO:0030260~entry into host cell	0	0	0.214572	0.589004
GO:1904155~DN2 thymocyte differentiation	0	0	0.0536431	0.52391
GO:2000404~regulation of T cell migration	0	0	0.107286	0.546678
GO:2000107~negative regulation of leukocyte apoptotic process	0	0	0.321859	0.627382
GO:0051480~regulation of cytosolic calcium ion concentration	0	0	1.71658	0.895929
GO:0009214~cyclic nucleotide catabolic process	0	0	0.0536431	0.52391
GO:0031999~negative regulation of fatty acid beta-oxidation	0	0	0.214572	0.589004
GO:0060405~regulation of penile erection	0	0	0.0536431	0.52391
GO:0040007~growth	1.99733	3	1.50201	0.0952819
GO:0060414~aorta smooth muscle tissue morphogenesis	0	0	0.160929	0.568359
GO:0006919~activation of cysteine-type endopeptidase activity involved in apoptotic process	0.898397	4	4.45238	0.465255
GO:0007548~sex differentiation	3.88369	5	1.28743	0.00283336
GO:0060325~face morphogenesis	0.621391	1	1.60929	0.597094
GO:0030574~collagen catabolic process	1.16511	4	3.43316	0.278634
GO:0032836~glomerular basement membrane development	2.0713	1	0.482788	0.211225
GO:0007528~neuromuscular junction development	0.665776	1	1.50201	0.5683
GO:0006123~mitochondrial electron transport, cytochrome c to oxygen	0.932086	1	1.07286	0.436314
GO:0045333~cellular respiration	0.887701	1	1.1265	0.454312
GO:0010718~positive regulation of epithelial to mesenchymal transition	2.8245	5	1.77022	0.0117846
GO:0060351~cartilage development involved in endochondral bone morphogenesis	0	0	0.268215	0.608663
GO:0035434~copper ion transmembrane transport	0	0	0.214572	0.589004
GO:0003331~positive regulation of extracellular matrix constituent secretion	0	0	0.160929	0.568359
GO:0016338~calcium-independent cell-cell adhesion via plasma membrane cell-adhesion molecules	0	0	1.1265	0.821436
GO:2000147~positive regulation of cell motility	2.6631	2	0.751003	0.0845083
GO:0051894~positive regulation of focal adhesion assembly	0.887701	1	1.1265	0.454312
GO:0006891~intra-Golgi vesicle-mediated transport	0.690434	1	1.44836	0.553285
GO:2000346~negative regulation of hepatocyte proliferation	0	0	0.214572	0.589004
GO:0007565~female pregnancy	0.837831	4	4.77424	0.521726
GO:0032463~negative regulation of protein homooligomerization	3.10695	1	0.321859	0.142447
GO:0006518~peptide metabolic process	1.43398	1	0.69736	0.298524
GO:0045957~negative regulation of complement activation, alternative pathway	0	0	0.107286	0.546678
GO:0032916~positive regulation of transforming growth factor beta3 production	0	0	0.107286	0.546678
GO:0071548~response to dexamethasone	2.6631	1	0.375502	0.165639
GO:0007494~midgut development	4.14261	2	0.482788	0.0365656
GO:0070409~carbamoyl phosphate biosynthetic process	0	0	0.0536431	0.52391
GO:0071400~cellular response to oleic acid	0	0	0.160929	0.568359
GO:0006853~carnitine shuttle	0	0	0.482788	0.678343
GO:0036120~cellular response to platelet-derived growth factor stimulus	0	0	0.965576	0.793124
GO:0045672~positive regulation of osteoclast differentiation	0	0	1.01922	0.803027
GO:0045899~positive regulation of RNA polymerase II transcriptional preinitiation complex assembly	0	0	0.482788	0.678343
GO:0060509~Type I pneumocyte differentiation	3.72835	1	0.268215	0.119032
GO:0051412~response to corticosterone	3.10695	3	0.965576	0.0306502
GO:0035865~cellular response to potassium ion	0	0	0.429145	0.662181
GO:0048265~response to pain	1.09657	1	0.911933	0.379754
GO:0070093~negative regulation of glucagon secretion	0	0	0.160929	0.568359
GO:0016101~diterpenoid metabolic process	7.45669	2	0.268215	0.0108758
GO:0051464~positive regulation of cortisol secretion	0	0	0.214572	0.589004
GO:0014062~regulation of serotonin secretion	0	0	0.107286	0.546678
GO:0035774~positive regulation of insulin secretion involved in cellular response to glucose stimulus	0	0	1.55565	0.879416
GO:0033685~negative regulation of luteinizing hormone secretion	0	0	0.160929	0.568359
GO:0001963~synaptic transmission, dopaminergic	1.43398	1	0.69736	0.298524
GO:0007567~parturition	3.10695	2	0.643717	0.0635587
GO:0030097~hemopoiesis	1.26385	4	3.16494	0.231208
GO:0043087~regulation of GTPase activity	0.860388	3	3.4868	0.492282
GO:2000378~negative regulation of reactive oxygen species metabolic process	0.887701	1	1.1265	0.454312
GO:0051403~stress-activated MAPK cascade	1.7754	2	1.1265	0.171058
GO:2000323~negative regulation of glucocorticoid receptor signaling pathway	0	0	0.321859	0.627382
GO:0009785~blue light signaling pathway	0	0	0.107286	0.546678
GO:0050896~response to stimulus	0.601346	2	3.32587	0.689021
GO:0030851~granulocyte differentiation	0	0	0.590074	0.708387
GO:0046579~positive regulation of Ras protein signal transduction	1.96229	2	1.01922	0.144685
GO:0046488~phosphatidylinositol metabolic process	0	0	0.590074	0.708387
GO:0002009~morphogenesis of an epithelium	1.33155	1	0.751003	0.319432
GO:0060045~positive regulation of cardiac muscle cell proliferation	2.54205	3	1.18015	0.0522438
GO:0031281~positive regulation of cyclase activity	0	0	0.160929	0.568359
GO:0045648~positive regulation of erythrocyte differentiation	0.776739	1	1.28743	0.505721
GO:2000379~positive regulation of reactive oxygen species metabolic process	1.24278	2	1.60929	0.297547
GO:0043536~positive regulation of blood vessel endothelial cell migration	0	0	1.01922	0.803027
GO:0097186~amelogenesis	0	0	0.482788	0.678343
GO:0060397~JAK-STAT cascade involved in growth hormone signaling pathway	0	0	0.804646	0.760328
GO:0030224~monocyte differentiation	1.09657	1	0.911933	0.379754
GO:0001817~regulation of cytokine production	0	0	0.69736	0.735629
GO:0032922~circadian regulation of gene expression	0.981144	3	3.05766	0.403601
GO:0030178~negative regulation of Wnt signaling pathway	1.43398	4	2.78944	0.16919
GO:0048715~negative regulation of oligodendrocyte differentiation	1.6947	1	0.590074	0.255575
GO:1904793~regulation of euchromatin binding	18.6417	1	0.0536431	0.0239102
GO:0060479~lung cell differentiation	18.6417	1	0.0536431	0.0239102
GO:1904798~positive regulation of core promoter binding	18.6417	1	0.0536431	0.0239102
GO:0007398~ectoderm development	1.43398	1	0.69736	0.298524
GO:0051145~smooth muscle cell differentiation	2.86796	2	0.69736	0.0737686
GO:0033234~negative regulation of protein sumoylation	1.6947	1	0.590074	0.255575
GO:0042129~regulation of T cell proliferation	2.33022	1	0.429145	0.188574
GO:0009948~anterior/posterior axis specification	2.19314	2	0.911933	0.119479
GO:0060916~mesenchymal cell proliferation involved in lung development	6.21391	1	0.160929	0.0716761
GO:0022009~central nervous system vasculogenesis	4.66043	1	0.214572	0.095428
GO:0030206~chondroitin sulfate biosynthetic process	1.49134	2	1.34108	0.226258
GO:0055014~atrial cardiac muscle cell development	0	0	0.160929	0.568359
GO:0048599~oocyte development	2.86796	2	0.69736	0.0737686
GO:0030208~dermatan sulfate biosynthetic process	1.55348	1	0.643717	0.277233
GO:0070221~sulfide oxidation, using sulfide:quinone oxidoreductase	0	0	0.214572	0.589004
GO:0045861~negative regulation of proteolysis	0.887701	1	1.1265	0.454312
GO:0001580~detection of chemical stimulus involved in sensory perception of bitter taste	0	0	2.14572	0.92974
GO:2000117~negative regulation of cysteine-type endopeptidase activity	0	0	0.858289	0.7718
GO:0010466~negative regulation of peptidase activity	1.09657	1	0.911933	0.379754
GO:0060037~pharyngeal system development	1.03565	1	0.965576	0.399033
GO:0042517~positive regulation of tyrosine phosphorylation of Stat3 protein	0.490572	1	2.03844	0.696703
GO:0048666~neuron development	2.02627	5	2.46758	0.0444704
GO:0051385~response to mineralocorticoid	0	0	0.214572	0.589004
GO:0031103~axon regeneration	1.33155	1	0.751003	0.319432
GO:0060929~atrioventricular node cell fate commitment	0	0	0.0536431	0.52391
GO:0003166~bundle of His development	0	0	0.160929	0.568359
GO:0001570~vasculogenesis	0	0	3.00401	0.967995
GO:0003342~proepicardium development	0	0	0.160929	0.568359
GO:0050872~white fat cell differentiation	0	0	0.69736	0.735629
GO:0090241~negative regulation of histone H4 acetylation	0	0	0.107286	0.546678
GO:0048386~positive regulation of retinoic acid receptor signaling pathway	0	0	0.214572	0.589004
GO:0071897~DNA biosynthetic process	0.71699	1	1.39472	0.537853
GO:0051496~positive regulation of stress fiber assembly	0.443851	1	2.25301	0.737949
GO:0006534~cysteine metabolic process	0	0	0.214572	0.589004
GO:0090136~epithelial cell-cell adhesion	0	0	0.482788	0.678343
GO:0002088~lens development in camera-type eye	1.1298	2	1.77022	0.340429
GO:0019346~transsulfuration	0	0	0.268215	0.608663
GO:0002224~toll-like receptor signaling pathway	0.690434	1	1.44836	0.553285
GO:0042738~exogenous drug catabolic process	0	0	0.643717	0.722342
GO:0097267~omega-hydroxylase P450 pathway	0	0	0.482788	0.678343
GO:0090350~negative regulation of cellular organofluorine metabolic process	0	0	0.0536431	0.52391
GO:0018910~benzene metabolic process	0	0	0.0536431	0.52391
GO:0018931~naphthalene metabolic process	0	0	0.107286	0.546678
GO:0002764~immune response-regulating signaling pathway	0	0	0.107286	0.546678
GO:0046483~heterocycle metabolic process	0	0	0.321859	0.627382
GO:0016098~monoterpenoid metabolic process	0	0	0.321859	0.627382
GO:0050832~defense response to fungus	0	0	1.44836	0.866978
GO:0031648~protein destabilization	2.13048	4	1.87751	0.0543276
GO:0010634~positive regulation of epithelial cell migration	0	0	1.77022	0.900915
GO:0060008~Sertoli cell differentiation	0	0	0.375502	0.645207
GO:0021675~nerve development	0	0	0.482788	0.678343
GO:0060441~epithelial tube branching involved in lung morphogenesis	1.24278	1	0.804646	0.339946
GO:0017004~cytochrome complex assembly	0	0	0.107286	0.546678
GO:0097411~hypoxia-inducible factor-1alpha signaling pathway	4.66043	1	0.214572	0.095428
GO:0050665~hydrogen peroxide biosynthetic process	0	0	0.482788	0.678343
GO:0006778~porphyrin-containing compound metabolic process	0	0	0.214572	0.589004
GO:0010669~epithelial structure maintenance	0	0	0.375502	0.645207
GO:0003106~negative regulation of glomerular filtration by angiotensin	0	0	0.0536431	0.52391
GO:0032930~positive regulation of superoxide anion generation	4.14261	2	0.482788	0.0365656
GO:1904044~response to aldosterone	0	0	0.160929	0.568359
GO:0032760~positive regulation of tumor necrosis factor production	0.793265	2	2.52123	0.528102
GO:1904845~cellular response to L-glutamine	0	0	0.160929	0.568359
GO:0006122~mitochondrial electron transport, ubiquinol to cytochrome c	0	0	0.804646	0.760328
GO:0060137~maternal process involved in parturition	6.21391	2	0.321859	0.0160424
GO:1900087~positive regulation of G1/S transition of mitotic cell cycle	1.6947	2	1.18015	0.184598
GO:0032870~cellular response to hormone stimulus	1.24278	3	2.41394	0.266154
GO:0002017~regulation of blood volume by renal aldosterone	0	0	0.107286	0.546678
GO:0006702~androgen biosynthetic process	1.6947	1	0.590074	0.255575
GO:0046834~lipid phosphorylation	0	0	0.643717	0.722342
GO:0019373~epoxygenase P450 pathway	0	0	0.965576	0.793124
GO:0071375~cellular response to peptide hormone stimulus	0.932086	1	1.07286	0.436314
GO:0044550~secondary metabolite biosynthetic process	0	0	0.268215	0.608663
GO:0021942~radial glia guided migration of Purkinje cell	0	0	0.268215	0.608663
GO:0021589~cerebellum structural organization	0	0	0.107286	0.546678
GO:0010980~positive regulation of vitamin D 24-hydroxylase activity	0	0	0.160929	0.568359
GO:0016340~calcium-dependent cell-matrix adhesion	0	0	0.107286	0.546678
GO:0009822~alkaloid catabolic process	0	0	0.160929	0.568359
GO:0070561~vitamin D receptor signaling pathway	0	0	0.160929	0.568359
GO:0034341~response to interferon-gamma	0	0	1.28743	0.845878
GO:0006766~vitamin metabolic process	2.33022	1	0.429145	0.188574
GO:2000279~negative regulation of DNA biosynthetic process	3.10695	2	0.643717	0.0635587
GO:0031664~regulation of lipopolysaccharide-mediated signaling pathway	0	0	0.160929	0.568359
GO:0055130~D-alanine catabolic process	0	0	0.0536431	0.52391
GO:0046487~glyoxylate metabolic process	1.43398	2	1.39472	0.240397
GO:0010977~negative regulation of neuron projection development	1.6947	4	2.3603	0.107649
GO:0071625~vocalization behavior	2.6631	2	0.751003	0.0845083
GO:1901214~regulation of neuron death	1.09657	1	0.911933	0.379754
GO:0010970~establishment of localization by movement along microtubule	0	0	0.0536431	0.52391
GO:0090063~positive regulation of microtubule nucleation	0	0	0.0536431	0.52391
GO:0006487~protein N-linked glycosylation	0.955986	2	2.09208	0.424224
GO:0048511~rhythmic process	1.03565	3	2.89673	0.369311
GO:0008016~regulation of heart contraction	1.20269	2	1.66294	0.311871
GO:0008625~extrinsic apoptotic signaling pathway via death domain receptors	1.47172	3	2.03844	0.189553
GO:0070935~3'-UTR-mediated mRNA stabilization	1.09657	1	0.911933	0.379754
GO:2001236~regulation of extrinsic apoptotic signaling pathway	0	0	0.268215	0.608663
GO:0090141~positive regulation of mitochondrial fission	2.48556	2	0.804646	0.0957344
GO:0007346~regulation of mitotic cell cycle	0.466043	1	2.14572	0.717989
GO:0010508~positive regulation of autophagy	1.39813	3	2.14572	0.210823
GO:0046134~pyrimidine nucleoside biosynthetic process	0	0	0.321859	0.627382
GO:0071838~cell proliferation in bone marrow	0	0	0.0536431	0.52391
GO:0035518~histone H2A monoubiquitination	1.55348	1	0.643717	0.277233
GO:0071799~cellular response to prostaglandin D stimulus	3.10695	1	0.321859	0.142447
GO:1903608~protein localization to cytoplasmic stress granule	0	0	0.375502	0.645207
GO:0046726~positive regulation by virus of viral protein levels in host cell	0	0	0.214572	0.589004
GO:0006294~nucleotide-excision repair, preincision complex assembly	0	0	1.55565	0.879416
GO:0042448~progesterone metabolic process	2.0713	1	0.482788	0.211225
GO:0072655~establishment of protein localization to mitochondrion	0	0	0.321859	0.627382
GO:1903026~negative regulation of RNA polymerase II regulatory region sequence-specific DNA binding	0	0	0.214572	0.589004
GO:0043433~negative regulation of sequence-specific DNA binding transcription factor activity	0.932086	3	3.21859	0.437434
GO:0006446~regulation of translational initiation	0	0	1.93115	0.914487
GO:0010501~RNA secondary structure unwinding	0.423676	1	2.3603	0.756644
GO:0033962~cytoplasmic mRNA processing body assembly	0	0	0.69736	0.735629
GO:0043928~exonucleolytic nuclear-transcribed mRNA catabolic process involved in deadenylation-dependent decay	0.642818	1	1.55565	0.582901
GO:1901838~positive regulation of transcription of nuclear large rRNA transcript from RNA polymerase I promoter	0	0	0.375502	0.645207
GO:0050830~defense response to Gram-positive bacterium	0.438629	2	4.55966	0.848908
GO:2001244~positive regulation of intrinsic apoptotic signaling pathway	0	0	1.77022	0.900915
GO:0010923~negative regulation of phosphatase activity	0.365524	1	2.7358	0.813006
GO:0048646~anatomical structure formation involved in morphogenesis	1.6947	1	0.590074	0.255575
GO:0009157~deoxyribonucleoside monophosphate biosynthetic process	0	0	0.268215	0.608663
GO:0030041~actin filament polymerization	1.43398	2	1.39472	0.240397
GO:0000910~cytokinesis	0.388369	1	2.57487	0.790487
GO:0033490~cholesterol biosynthetic process via lathosterol	0	0	0.214572	0.589004
GO:0042987~amyloid precursor protein catabolic process	0	0	0.429145	0.662181
GO:1903576~response to L-arginine	0	0	0.107286	0.546678
GO:0071420~cellular response to histamine	4.66043	2	0.429145	0.0289391
GO:0051279~regulation of release of sequestered calcium ion into cytosol	0	0	0.590074	0.708387
GO:0042446~hormone biosynthetic process	1.55348	1	0.643717	0.277233
GO:0045454~cell redox homeostasis	0.726301	3	4.13052	0.612571
GO:0090287~regulation of cellular response to growth factor stimulus	4.66043	1	0.214572	0.095428
GO:0001658~branching involved in ureteric bud morphogenesis	1.7754	4	2.25301	0.0942187
GO:0051973~positive regulation of telomerase activity	0.642818	1	1.55565	0.582901
GO:0045197~establishment or maintenance of epithelial cell apical/basal polarity	0	0	0.69736	0.735629
GO:0046037~GMP metabolic process	1.24278	1	0.804646	0.339946
GO:0009954~proximal/distal pattern formation	3.88369	5	1.28743	0.00283336
GO:0001568~blood vessel development	1.47172	3	2.03844	0.189553
GO:0001958~endochondral ossification	2.86796	4	1.39472	0.0202949
GO:0010881~regulation of cardiac muscle contraction by regulation of the release of sequestered calcium ion	0.981144	1	1.01922	0.417887
GO:0048812~neuron projection morphogenesis	1.55348	4	2.57487	0.13696
GO:0060857~establishment of glial blood-brain barrier	0	0	0.107286	0.546678
GO:0070173~regulation of enamel mineralization	0	0	0.107286	0.546678
GO:0006264~mitochondrial DNA replication	0	0	0.482788	0.678343
GO:0090305~nucleic acid phosphodiester bond hydrolysis	0.497113	2	4.02323	0.791073
GO:0006284~base-excision repair	1.06524	2	1.87751	0.36875
GO:0051932~synaptic transmission, GABAergic	0	0	0.375502	0.645207
GO:0003374~dynamin polymerization involved in mitochondrial fission	0	0	0.375502	0.645207
GO:0010657~muscle cell apoptotic process	0	0	0.0536431	0.52391
GO:1902990~mitotic telomere maintenance via semi-conservative replication	0	0	0.160929	0.568359
GO:0000731~DNA synthesis involved in DNA repair	0.532621	1	1.87751	0.662153
GO:1903526~negative regulation of membrane tubulation	0	0	0.107286	0.546678
GO:0050999~regulation of nitric-oxide synthase activity	2.15097	3	1.39472	0.0796113
GO:0042220~response to cocaine	1.74766	3	1.71658	0.130128
GO:0046499~S-adenosylmethioninamine metabolic process	9.32086	1	0.107286	0.0478204
GO:0006306~DNA methylation	1.49134	2	1.34108	0.226258
GO:0090116~C-5 methylation of cytosine	6.21391	1	0.160929	0.0716761
GO:0016458~gene silencing	0	0	0.375502	0.645207
GO:0033189~response to vitamin A	3.10695	3	0.965576	0.0306502
GO:0043046~DNA methylation involved in gamete generation	1.03565	1	0.965576	0.399033
GO:0050766~positive regulation of phagocytosis	0	0	1.55565	0.879416
GO:0006047~UDP-N-acetylglucosamine metabolic process	0	0	0.375502	0.645207
GO:0043154~negative regulation of cysteine-type endopeptidase activity involved in apoptotic process	0.27017	1	3.70137	0.907465
GO:0046135~pyrimidine nucleoside catabolic process	3.38941	2	0.590074	0.0539238
GO:0046676~negative regulation of insulin secretion	1.80404	3	1.66294	0.121011
GO:0030432~peristalsis	0	0	0.375502	0.645207
GO:0010976~positive regulation of neuron projection development	0.418915	2	4.77424	0.867781
GO:0010975~regulation of neuron projection development	3.92457	4	1.01922	0.00647965
GO:0043966~histone H3 acetylation	1.73411	4	2.30665	0.100827
GO:0006821~chloride transport	2.33022	5	2.14572	0.0259783
GO:1902358~sulfate transmembrane transport	1.55348	1	0.643717	0.277233
GO:0060081~membrane hyperpolarization	0	0	0.590074	0.708387
GO:0060291~long-term synaptic potentiation	1.96229	4	2.03844	0.0700207
GO:0042711~maternal behavior	2.86796	2	0.69736	0.0737686
GO:0021769~orbitofrontal cortex development	0	0	0.160929	0.568359
GO:0032228~regulation of synaptic transmission, GABAergic	1.55348	1	0.643717	0.277233
GO:0048169~regulation of long-term neuronal synaptic plasticity	1.03565	1	0.965576	0.399033
GO:0040018~positive regulation of multicellular organism growth	1.06524	2	1.87751	0.36875
GO:0007628~adult walking behavior	1.80404	3	1.66294	0.121011
GO:0035815~positive regulation of renal sodium excretion	3.10695	2	0.643717	0.0635587
GO:0001994~norepinephrine-epinephrine vasoconstriction involved in regulation of systemic arterial blood pressure	0	0	0.214572	0.589004
GO:0007416~synapse assembly	1.52801	5	3.27223	0.118399
GO:0051151~negative regulation of smooth muscle cell differentiation	2.6631	1	0.375502	0.165639
GO:0002934~desmosome organization	0	0	0.268215	0.608663
GO:0006227~dUDP biosynthetic process	0	0	0.107286	0.546678
GO:0010942~positive regulation of cell death	0.642818	1	1.55565	0.582901
GO:0003223~ventricular compact myocardium morphogenesis	0	0	0.321859	0.627382
GO:0086091~regulation of heart rate by cardiac conduction	0.532621	1	1.87751	0.662153
GO:0019532~oxalate transport	1.6947	1	0.590074	0.255575
GO:0060420~regulation of heart growth	0	0	0.107286	0.546678
GO:0051085~chaperone mediated protein folding requiring cofactor	0	0	0.536431	0.693733
GO:0030177~positive regulation of Wnt signaling pathway	2.0713	4	1.93115	0.0593189
GO:1903827~regulation of cellular protein localization	0	0	0.482788	0.678343
GO:0000381~regulation of alternative mRNA splicing, via spliceosome	1.96229	4	2.03844	0.0700207
GO:1900740~positive regulation of protein insertion into mitochondrial membrane involved in apoptotic signaling pathway	0	0	1.60929	0.885192
GO:0002313~mature B cell differentiation involved in immune response	0	0	0.0536431	0.52391
GO:0002828~regulation of type 2 immune response	0	0	0.0536431	0.52391
GO:1901222~regulation of NIK/NF-kappaB signaling	2.6631	1	0.375502	0.165639
GO:0010818~T cell chemotaxis	2.33022	1	0.429145	0.188574
GO:0006206~pyrimidine nucleobase metabolic process	0	0	0.321859	0.627382
GO:0009062~fatty acid catabolic process	2.0713	1	0.482788	0.211225
GO:0030502~negative regulation of bone mineralization	1.24278	1	0.804646	0.339946
GO:0045859~regulation of protein kinase activity	0	0	1.82387	0.905663
GO:0022038~corpus callosum development	3.10695	1	0.321859	0.142447
GO:0043507~positive regulation of JUN kinase activity	1.20269	2	1.66294	0.311871
GO:0042554~superoxide anion generation	1.33155	1	0.751003	0.319432
GO:0051482~positive regulation of cytosolic calcium ion concentration involved in phospholipase C-activating G-protein coupled signaling pathway	0.665776	1	1.50201	0.5683
GO:0010594~regulation of endothelial cell migration	3.10695	1	0.321859	0.142447
GO:0071453~cellular response to oxygen levels	0	0	0.160929	0.568359
GO:0032060~bleb assembly	0	0	0.536431	0.693733
GO:0032651~regulation of interleukin-1 beta production	0	0	0.160929	0.568359
GO:0060298~positive regulation of sarcomere organization	4.66043	1	0.214572	0.095428
GO:0030072~peptide hormone secretion	4.66043	1	0.214572	0.095428
GO:0042116~macrophage activation	0	0	0.536431	0.693733
GO:0002690~positive regulation of leukocyte chemotaxis	1.03565	1	0.965576	0.399033
GO:0042310~vasoconstriction	2.19314	2	0.911933	0.119479
GO:0008217~regulation of blood pressure	0.860388	3	3.4868	0.492282
GO:0003100~regulation of systemic arterial blood pressure by endothelin	3.72835	1	0.268215	0.119032
GO:0046887~positive regulation of hormone secretion	4.66043	2	0.429145	0.0289391
GO:0048070~regulation of developmental pigmentation	4.66043	1	0.214572	0.095428
GO:0060322~head development	0	0	0.536431	0.693733
GO:0071364~cellular response to epidermal growth factor stimulus	1.1298	2	1.77022	0.340429
GO:1904714~regulation of chaperone-mediated autophagy	0	0	0.268215	0.608663
GO:0051602~response to electrical stimulus	1.55348	2	1.28743	0.212227
GO:0010941~regulation of cell death	0	0	0.590074	0.708387
GO:0003009~skeletal muscle contraction	0	0	1.28743	0.845878
GO:0003183~mitral valve morphogenesis	2.6631	1	0.375502	0.165639
GO:0048845~venous blood vessel morphogenesis	0	0	0.321859	0.627382
GO:0002042~cell migration involved in sprouting angiogenesis	2.48556	2	0.804646	0.0957344
GO:0042743~hydrogen peroxide metabolic process	3.72835	1	0.268215	0.119032
GO:0022407~regulation of cell-cell adhesion	0	0	0.536431	0.693733
GO:2000727~positive regulation of cardiac muscle cell differentiation	3.72835	2	0.536431	0.0449102
GO:0009887~organ morphogenesis	1.01314	5	4.93516	0.363956
GO:0044332~Wnt signaling pathway involved in dorsal/ventral axis specification	3.72835	1	0.268215	0.119032
GO:0055113~epiboly involved in gastrulation with mouth forming second	0	0	0.0536431	0.52391
GO:0033590~response to cobalamin	6.21391	1	0.160929	0.0716761
GO:1905208~negative regulation of cardiocyte differentiation	18.6417	1	0.0536431	0.0239102
GO:0071506~cellular response to mycophenolic acid	0	0	0.107286	0.546678
GO:0008045~motor neuron axon guidance	1.96229	2	1.01922	0.144685
GO:0045740~positive regulation of DNA replication	0.887701	2	2.25301	0.464436
GO:0010960~magnesium ion homeostasis	6.21391	2	0.321859	0.0160424
GO:0045930~negative regulation of mitotic cell cycle	1.43398	2	1.39472	0.240397
GO:0030217~T cell differentiation	0.621391	1	1.60929	0.597094
GO:0035914~skeletal muscle cell differentiation	1.52177	4	2.62851	0.144761
GO:0007622~rhythmic behavior	0	0	0.0536431	0.52391
GO:0006475~internal protein amino acid acetylation	2.33022	1	0.429145	0.188574
GO:0045773~positive regulation of axon extension	1.86417	3	1.60929	0.112155
GO:0006452~translational frameshifting	0	0	0.160929	0.568359
GO:0000289~nuclear-transcribed mRNA poly(A) tail shortening	0	0	1.55565	0.879416
GO:0045905~positive regulation of translational termination	0	0	0.160929	0.568359
GO:0031017~exocrine pancreas development	0	0	0.429145	0.662181
GO:0060309~elastin catabolic process	0	0	0.0536431	0.52391
GO:0071394~cellular response to testosterone stimulus	3.72835	1	0.268215	0.119032
GO:0009416~response to light stimulus	1.09657	1	0.911933	0.379754
GO:0030010~establishment of cell polarity	0	0	1.28743	0.845878
GO:0051646~mitochondrion localization	0	0	0.375502	0.645207
GO:0021895~cerebral cortex neuron differentiation	1.86417	1	0.536431	0.233566
GO:0006930~substrate-dependent cell migration, cell extension	6.21391	3	0.482788	0.00395345
GO:0003208~cardiac ventricle morphogenesis	2.0713	1	0.482788	0.211225
GO:0048844~artery morphogenesis	1.7754	2	1.1265	0.171058
GO:0097084~vascular smooth muscle cell development	0	0	0.321859	0.627382
GO:0021762~substantia nigra development	0.380443	1	2.62851	0.798254
GO:0036475~neuron death in response to oxidative stress	0	0	0.0536431	0.52391
GO:0070278~extracellular matrix constituent secretion	0	0	0.160929	0.568359
GO:0061621~canonical glycolysis	0	0	1.39472	0.860287
GO:0030183~B cell differentiation	0.564901	2	3.54044	0.72397
GO:0030431~sleep	6.77881	4	0.590074	0.000698581
GO:1901642~nucleoside transmembrane transport	0	0	0.268215	0.608663
GO:0042415~norepinephrine metabolic process	0	0	0.268215	0.608663
GO:0043129~surfactant homeostasis	0	0	0.429145	0.662181
GO:0031032~actomyosin structure organization	2.0713	3	1.44836	0.0872902
GO:0007016~cytoskeletal anchoring at plasma membrane	3.38941	2	0.590074	0.0539238
GO:0090315~negative regulation of protein targeting to membrane	0	0	0.321859	0.627382
GO:0044829~positive regulation by host of viral genome replication	2.33022	1	0.429145	0.188574
GO:0034446~substrate adhesion-dependent cell spreading	0.981144	2	2.03844	0.410533
GO:0097156~fasciculation of motor neuron axon	0	0	0.107286	0.546678
GO:0050775~positive regulation of dendrite morphogenesis	2.19314	2	0.911933	0.119479
GO:0001547~antral ovarian follicle growth	0	0	0.160929	0.568359
GO:0060523~prostate epithelial cord elongation	0	0	0.160929	0.568359
GO:0030520~intracellular estrogen receptor signaling pathway	0	0	1.1265	0.821436
GO:0008209~androgen metabolic process	0	0	0.858289	0.7718
GO:0048050~post-embryonic eye morphogenesis	0	0	0.214572	0.589004
GO:0030155~regulation of cell adhesion	0	0	2.30665	0.939367
GO:0046272~stilbene catabolic process	0	0	0.0536431	0.52391
GO:0045820~negative regulation of glycolytic process	0	0	0.590074	0.708387
GO:0006929~substrate-dependent cell migration	0	0	0.321859	0.627382
GO:0071372~cellular response to follicle-stimulating hormone stimulus	0	0	0.590074	0.708387
GO:0021952~central nervous system projection neuron axonogenesis	2.33022	1	0.429145	0.188574
GO:0048593~camera-type eye morphogenesis	3.49532	3	0.858289	0.0221263
GO:0060996~dendritic spine development	1.43398	1	0.69736	0.298524
GO:0048538~thymus development	2.16764	5	2.30665	0.0344488
GO:0060997~dendritic spine morphogenesis	3.10695	2	0.643717	0.0635587
GO:0007413~axonal fasciculation	3.10695	3	0.965576	0.0306502
GO:0001806~type IV hypersensitivity	0	0	0.107286	0.546678
GO:0007340~acrosome reaction	1.16511	1	0.858289	0.360057
GO:1902219~negative regulation of intrinsic apoptotic signaling pathway in response to osmotic stress	6.21391	1	0.160929	0.0716761
GO:0031532~actin cytoskeleton reorganization	1.98316	5	2.52123	0.048164
GO:0006895~Golgi to endosome transport	0	0	1.01922	0.803027
GO:0038128~ERBB2 signaling pathway	0.981144	2	2.03844	0.410533
GO:0070555~response to interleukin-1	0	0	1.77022	0.900915
GO:0008015~blood circulation	1.24278	3	2.41394	0.266154
GO:0016601~Rac protein signal transduction	0	0	1.01922	0.803027
GO:0070372~regulation of ERK1 and ERK2 cascade	0.745669	1	1.34108	0.522
GO:0045727~positive regulation of translation	1.05519	3	2.84308	0.357819
GO:0032886~regulation of microtubule-based process	0	0	0.482788	0.678343
GO:0045943~positive regulation of transcription from RNA polymerase I promoter	0	0	0.536431	0.693733
GO:0001755~neural crest cell migration	1.24278	3	2.41394	0.266154
GO:0048661~positive regulation of smooth muscle cell proliferation	0.621391	2	3.21859	0.670302
GO:0001556~oocyte maturation	1.03565	1	0.965576	0.399033
GO:0045840~positive regulation of mitotic nuclear division	0.71699	1	1.39472	0.537853
GO:0006295~nucleotide-excision repair, DNA incision, 3'-to lesion	0	0	1.23379	0.838127
GO:0006296~nucleotide-excision repair, DNA incision, 5'-to lesion	0	0	1.98479	0.918585
GO:0006302~double-strand break repair	0.28245	1	3.54044	0.89572
GO:0000710~meiotic mismatch repair	3.10695	1	0.321859	0.142447
GO:0006368~transcription elongation from RNA polymerase II promoter	0.867057	4	4.61331	0.493799
GO:0000717~nucleotide-excision repair, DNA duplex unwinding	0	0	1.18015	0.829986
GO:0006362~transcription elongation from RNA polymerase I promoter	1.24278	2	1.60929	0.297547
GO:0035315~hair cell differentiation	3.10695	1	0.321859	0.142447
GO:0042700~luteinizing hormone signaling pathway	0	0	0.107286	0.546678
GO:0042108~positive regulation of cytokine biosynthetic process	0	0	0.0536431	0.52391
GO:0090502~RNA phosphodiester bond hydrolysis, endonucleolytic	0.338941	1	2.95037	0.839588
GO:0048384~retinoic acid receptor signaling pathway	2.0713	2	0.965576	0.131918
GO:0006370~7-methylguanosine mRNA capping	0.564901	1	1.77022	0.637286
GO:0006283~transcription-coupled nucleotide-excision repair	0.503831	2	3.96959	0.784365
GO:0000712~resolution of meiotic recombination intermediates	0	0	0.858289	0.7718
GO:0009411~response to UV	0.887701	2	2.25301	0.464436
GO:0045747~positive regulation of Notch signaling pathway	0.564901	1	1.77022	0.637286
GO:0006449~regulation of translational termination	3.10695	1	0.321859	0.142447
GO:0021854~hypothalamus development	1.24278	1	0.804646	0.339946
GO:0046677~response to antibiotic	0	0	1.71658	0.895929
GO:0045739~positive regulation of DNA repair	0.621391	1	1.60929	0.597094
GO:1904996~positive regulation of leukocyte adhesion to vascular endothelial cell	0	0	0.107286	0.546678
GO:0090009~primitive streak formation	1.86417	1	0.536431	0.233566
GO:0048935~peripheral nervous system neuron development	0	0	0.536431	0.693733
GO:0006024~glycosaminoglycan biosynthetic process	1.7754	4	2.25301	0.0942187
GO:0001707~mesoderm formation	0	0	1.50201	0.873349
GO:0048665~neuron fate specification	2.6631	2	0.751003	0.0845083
GO:0045664~regulation of neuron differentiation	0.932086	1	1.07286	0.436314
GO:0050679~positive regulation of epithelial cell proliferation	1.55348	5	3.21859	0.112278
GO:2000134~negative regulation of G1/S transition of mitotic cell cycle	0.745669	1	1.34108	0.522
GO:0090198~negative regulation of chemokine secretion	0	0	0.0536431	0.52391
GO:0090103~cochlea morphogenesis	0.847351	1	1.18015	0.471879
GO:0016576~histone dephosphorylation	0	0	0.321859	0.627382
GO:0036333~hepatocyte homeostasis	0	0	0.0536431	0.52391
GO:0097421~liver regeneration	1.28564	2	1.55565	0.283216
GO:0007529~establishment of synaptic specificity at neuromuscular junction	0	0	0.0536431	0.52391
GO:0003105~negative regulation of glomerular filtration	0	0	0.268215	0.608663
GO:0070493~thrombin receptor signaling pathway	4.14261	2	0.482788	0.0365656
GO:0070723~response to cholesterol	0	0	0.429145	0.662181
GO:0019369~arachidonic acid metabolic process	0	0	1.34108	0.853259
GO:0055091~phospholipid homeostasis	0	0	0.482788	0.678343
GO:0034140~negative regulation of toll-like receptor 3 signaling pathway	0	0	0.160929	0.568359
GO:0050927~positive regulation of positive chemotaxis	1.6947	1	0.590074	0.255575
GO:0061476~response to anticoagulant	0	0	0.0536431	0.52391
GO:0010641~positive regulation of platelet-derived growth factor receptor signaling pathway	0	0	0.160929	0.568359
GO:0031638~zymogen activation	0	0	0.482788	0.678343
GO:0051919~positive regulation of fibrinolysis	0	0	0.214572	0.589004
GO:0018149~peptide cross-linking	0	0	2.68215	0.957015
GO:0032000~positive regulation of fatty acid beta-oxidation	2.0713	1	0.482788	0.211225
GO:0019433~triglyceride catabolic process	1.49134	2	1.34108	0.226258
GO:0015758~glucose transport	1.6947	3	1.77022	0.139494
GO:0032307~negative regulation of prostaglandin secretion	0	0	0.0536431	0.52391
GO:0006970~response to osmotic stress	1.03565	1	0.965576	0.399033
GO:2000310~regulation of N-methyl-D-aspartate selective glutamate receptor activity	3.72835	3	0.804646	0.0184366
GO:0051090~regulation of sequence-specific DNA binding transcription factor activity	0	0	1.34108	0.853259
GO:0045589~regulation of regulatory T cell differentiation	0	0	0.214572	0.589004
GO:0036109~alpha-linolenic acid metabolic process	0	0	0.69736	0.735629
GO:0006527~arginine catabolic process	0	0	0.429145	0.662181
GO:0009725~response to hormone	0.443851	1	2.25301	0.737949
GO:0010752~regulation of cGMP-mediated signaling	0	0	0.0536431	0.52391
GO:0042976~activation of Janus kinase activity	0	0	0.0536431	0.52391
GO:0045638~negative regulation of myeloid cell differentiation	0.981144	1	1.01922	0.417887
GO:1904237~positive regulation of substrate-dependent cell migration, cell attachment to substrate	0	0	0.107286	0.546678
GO:1900119~positive regulation of execution phase of apoptosis	2.0713	1	0.482788	0.211225
GO:0001805~positive regulation of type III hypersensitivity	0	0	0.107286	0.546678
GO:0010543~regulation of platelet activation	0	0	0.268215	0.608663
GO:0035426~extracellular matrix-cell signaling	0	0	0.214572	0.589004
GO:0001812~positive regulation of type I hypersensitivity	0	0	0.160929	0.568359
GO:0038094~Fc-gamma receptor signaling pathway	0	0	0.214572	0.589004
GO:0051770~positive regulation of nitric-oxide synthase biosynthetic process	1.43398	1	0.69736	0.298524
GO:0002925~positive regulation of humoral immune response mediated by circulating immunoglobulin	0	0	0.214572	0.589004
GO:0006694~steroid biosynthetic process	2.91277	5	1.71658	0.010332
GO:0051597~response to methylmercury	0	0	0.429145	0.662181
GO:0044331~cell-cell adhesion mediated by cadherin	4.66043	1	0.214572	0.095428
GO:2000261~negative regulation of blood coagulation, common pathway	0	0	0.0536431	0.52391
GO:0009792~embryo development ending in birth or egg hatching	0	0	0.268215	0.608663
GO:0000226~microtubule cytoskeleton organization	0.787679	3	3.80866	0.554693
GO:0045921~positive regulation of exocytosis	0	0	1.1265	0.821436
GO:0071347~cellular response to interleukin-1	1.3128	5	3.80866	0.187624
GO:0043623~cellular protein complex assembly	1.03565	1	0.965576	0.399033
GO:0001759~organ induction	0	0	0.643717	0.722342
GO:0036092~phosphatidylinositol-3-phosphate biosynthetic process	1.14133	3	2.62851	0.311785
GO:0045542~positive regulation of cholesterol biosynthetic process	0	0	0.268215	0.608663
GO:0008543~fibroblast growth factor receptor signaling pathway	0.682015	3	4.39873	0.656963
GO:0046668~regulation of retinal cell programmed cell death	0	0	0.107286	0.546678
GO:0006661~phosphatidylinositol biosynthetic process	0.964227	3	3.1113	0.414939
GO:0048598~embryonic morphogenesis	0	0	0.321859	0.627382
GO:0055026~negative regulation of cardiac muscle tissue development	9.32086	1	0.107286	0.0478204
GO:0060363~cranial suture morphogenesis	3.10695	1	0.321859	0.142447
GO:0051781~positive regulation of cell division	1.1899	3	2.52123	0.288875
GO:0060128~corticotropin hormone secreting cell differentiation	6.21391	1	0.160929	0.0716761
GO:0008078~mesodermal cell migration	0	0	0.107286	0.546678
GO:0010463~mesenchymal cell proliferation	0	0	0.214572	0.589004
GO:0061033~secretion by lung epithelial cell involved in lung growth	0	0	0.107286	0.546678
GO:0046622~positive regulation of organ growth	3.38941	2	0.590074	0.0539238
GO:0060425~lung morphogenesis	1.43398	1	0.69736	0.298524
GO:0023019~signal transduction involved in regulation of gene expression	0.981144	1	1.01922	0.417887
GO:0033563~dorsal/ventral axon guidance	0	0	0.160929	0.568359
GO:0071338~positive regulation of hair follicle cell proliferation	0	0	0.107286	0.546678
GO:0060665~regulation of branching involved in salivary gland morphogenesis by mesenchymal-epithelial signaling	0	0	0.214572	0.589004
GO:0060019~radial glial cell differentiation	3.72835	1	0.268215	0.119032
GO:0060513~prostatic bud formation	0	0	0.214572	0.589004
GO:0010631~epithelial cell migration	0	0	0.321859	0.627382
GO:0050673~epithelial cell proliferation	3.10695	2	0.643717	0.0635587
GO:0048762~mesenchymal cell differentiation	2.33022	1	0.429145	0.188574
GO:0048568~embryonic organ development	1.09657	1	0.911933	0.379754
GO:0010518~positive regulation of phospholipase activity	2.33022	1	0.429145	0.188574
GO:0021847~ventricular zone neuroblast division	6.21391	1	0.160929	0.0716761
GO:0070640~vitamin D3 metabolic process	0	0	0.0536431	0.52391
GO:0043009~chordate embryonic development	0	0	0.160929	0.568359
GO:2001239~regulation of extrinsic apoptotic signaling pathway in absence of ligand	0	0	0.0536431	0.52391
GO:0030203~glycosaminoglycan metabolic process	3.21409	5	1.55565	0.00672186
GO:0048333~mesodermal cell differentiation	3.38941	2	0.590074	0.0539238
GO:0035604~fibroblast growth factor receptor signaling pathway involved in positive regulation of cell proliferation in bone marrow	0	0	0.0536431	0.52391
GO:0060667~branch elongation involved in salivary gland morphogenesis	0	0	0.107286	0.546678
GO:0042730~fibrinolysis	1.7754	2	1.1265	0.171058
GO:0042476~odontogenesis	2.0713	3	1.44836	0.0872902
GO:0090277~positive regulation of peptide hormone secretion	0	0	0.429145	0.662181
GO:0019227~neuronal action potential propagation	0	0	0.375502	0.645207
GO:0051209~release of sequestered calcium ion into cytosol	1.36403	3	2.19937	0.22167
GO:0032880~regulation of protein localization	0.71699	2	2.78944	0.586965
GO:0042026~protein refolding	0	0	0.804646	0.760328
GO:0051280~negative regulation of release of sequestered calcium ion into cytosol	0	0	0.214572	0.589004
GO:0022417~protein maturation by protein folding	0	0	0.482788	0.678343
GO:0000413~protein peptidyl-prolyl isomerization	0	0	2.30665	0.939367
GO:0048617~embryonic foregut morphogenesis	4.14261	2	0.482788	0.0365656
GO:0045198~establishment of epithelial cell apical/basal polarity	2.0713	1	0.482788	0.211225
GO:0007224~smoothened signaling pathway	0.81051	3	3.70137	0.534358
GO:0042249~establishment of planar polarity of embryonic epithelium	0	0	0.160929	0.568359
GO:0072016~glomerular parietal epithelial cell development	0	0	0.0536431	0.52391
GO:0097150~neuronal stem cell population maintenance	2.6631	3	1.1265	0.0462864
GO:0061303~cornea development in camera-type eye	2.33022	1	0.429145	0.188574
GO:0060429~epithelium development	0	0	0.214572	0.589004
GO:0002508~central tolerance induction	0	0	0.0536431	0.52391
GO:0042130~negative regulation of T cell proliferation	1.00766	2	1.98479	0.396716
GO:0060972~left/right pattern formation	0	0	0.429145	0.662181
GO:0060465~pharynx development	0	0	0.107286	0.546678
GO:0034599~cellular response to oxidative stress	0.291277	1	3.43316	0.887125
GO:2000353~positive regulation of endothelial cell apoptotic process	0	0	0.751003	0.748281
GO:0001946~lymphangiogenesis	0	0	0.590074	0.708387
GO:0042993~positive regulation of transcription factor import into nucleus	0	0	0.804646	0.760328
GO:0051764~actin crosslink formation	0	0	0.590074	0.708387
GO:0051220~cytoplasmic sequestering of protein	0	0	0.268215	0.608663
GO:0035726~common myeloid progenitor cell proliferation	0	0	0.375502	0.645207
GO:0043552~positive regulation of phosphatidylinositol 3-kinase activity	0.601346	1	1.66294	0.610886
GO:0090290~positive regulation of osteoclast proliferation	0	0	0.160929	0.568359
GO:0061713~anterior neural tube closure	0	0	0.0536431	0.52391
GO:0042340~keratan sulfate catabolic process	3.10695	2	0.643717	0.0635587
GO:0098908~regulation of neuronal action potential	6.21391	1	0.160929	0.0716761
GO:1900453~negative regulation of long term synaptic depression	9.32086	1	0.107286	0.0478204
GO:0098586~cellular response to virus	1.43398	1	0.69736	0.298524
GO:0001932~regulation of protein phosphorylation	0	0	1.82387	0.905663
GO:0018343~protein farnesylation	4.66043	1	0.214572	0.095428
GO:0060828~regulation of canonical Wnt signaling pathway	0.932086	1	1.07286	0.436314
GO:0071231~cellular response to folic acid	0	0	0.107286	0.546678
GO:0032570~response to progesterone	0.955986	2	2.09208	0.424224
GO:0001661~conditioned taste aversion	3.10695	1	0.321859	0.142447
GO:0002430~complement receptor mediated signaling pathway	0	0	0.536431	0.693733
GO:0035994~response to muscle stretch	2.33022	2	0.858289	0.107405
GO:0060395~SMAD protein signal transduction	1.20269	4	3.32587	0.259429
GO:0048714~positive regulation of oligodendrocyte differentiation	1.24278	1	0.804646	0.339946
GO:0046889~positive regulation of lipid biosynthetic process	3.10695	2	0.643717	0.0635587
GO:0003007~heart morphogenesis	1.74766	3	1.71658	0.130128
GO:0006950~response to stress	1.22241	4	3.27223	0.249936
GO:0090335~regulation of brown fat cell differentiation	0	0	0.268215	0.608663
GO:0021510~spinal cord development	1.86417	3	1.60929	0.112155
GO:0061053~somite development	1.33155	1	0.751003	0.319432
GO:0045780~positive regulation of bone resorption	2.86796	2	0.69736	0.0737686
GO:0070367~negative regulation of hepatocyte differentiation	0	0	0.0536431	0.52391
GO:0060029~convergent extension involved in organogenesis	0	0	0.107286	0.546678
GO:0060011~Sertoli cell proliferation	0	0	0.214572	0.589004
GO:0007292~female gamete generation	4.66043	4	0.858289	0.00332517
GO:0010738~regulation of protein kinase A signaling	1.33155	1	0.751003	0.319432
GO:0042632~cholesterol homeostasis	0.873831	3	3.43316	0.481496
GO:0007339~binding of sperm to zona pellucida	0.532621	1	1.87751	0.662153
GO:1903506~regulation of nucleic acid-templated transcription	1.16511	1	0.858289	0.360057
GO:0042355~L-fucose catabolic process	1.86417	1	0.536431	0.233566
GO:0007585~respiratory gaseous exchange	1.09657	2	1.82387	0.354627
GO:0070098~chemokine-mediated signaling pathway	1.05024	4	3.80866	0.34736
GO:0042177~negative regulation of protein catabolic process	1.74766	3	1.71658	0.130128
GO:0042523~positive regulation of tyrosine phosphorylation of Stat5 protein	1.09657	1	0.911933	0.379754
GO:0038083~peptidyl-tyrosine autophosphorylation	0.466043	1	2.14572	0.717989
GO:0042110~T cell activation	0	0	2.52123	0.950186
GO:0001780~neutrophil homeostasis	3.72835	1	0.268215	0.119032
GO:0001816~cytokine production	0	0	1.34108	0.853259
GO:0032682~negative regulation of chemokine production	0	0	0.160929	0.568359
GO:0032481~positive regulation of type I interferon production	0.731048	2	2.7358	0.5756
GO:0097680~double-strand break repair via classical nonhomologous end joining	6.21391	1	0.160929	0.0716761
GO:0007257~activation of JUN kinase activity	1.47172	3	2.03844	0.189553
GO:0070102~interleukin-6-mediated signaling pathway	0	0	0.482788	0.678343
GO:0072318~clathrin coat disassembly	0	0	0.160929	0.568359
GO:0072600~establishment of protein localization to Golgi	0	0	0.160929	0.568359
GO:0007029~endoplasmic reticulum organization	0.690434	1	1.44836	0.553285
GO:0001574~ganglioside biosynthetic process	1.03565	1	0.965576	0.399033
GO:0016198~axon choice point recognition	0	0	0.107286	0.546678
GO:0006006~glucose metabolic process	0.55647	2	3.59409	0.732199
GO:0070168~negative regulation of biomineral tissue development	0	0	0.160929	0.568359
GO:0060294~cilium movement involved in cell motility	0	0	0.321859	0.627382
GO:0030221~basophil differentiation	0	0	0.107286	0.546678
GO:0061623~glycolytic process from galactose	0	0	0.0536431	0.52391
GO:0018242~protein O-linked glycosylation via serine	0	0	0.160929	0.568359
GO:0018243~protein O-linked glycosylation via threonine	0	0	0.214572	0.589004
GO:0000023~maltose metabolic process	0	0	0.160929	0.568359
GO:0045165~cell fate commitment	1.21576	3	2.46758	0.277485
GO:0060628~regulation of ER to Golgi vesicle-mediated transport	0	0	0.268215	0.608663
GO:0019064~fusion of virus membrane with host plasma membrane	0	0	0.429145	0.662181
GO:0097028~dendritic cell differentiation	0	0	0.643717	0.722342
GO:2000352~negative regulation of endothelial cell apoptotic process	1.33155	2	1.50201	0.2689
GO:2000977~regulation of forebrain neuron differentiation	0	0	0.0536431	0.52391
GO:0045064~T-helper 2 cell differentiation	0	0	0.214572	0.589004
GO:2000607~negative regulation of cell proliferation involved in mesonephros development	0	0	0.0536431	0.52391
GO:0045061~thymic T cell selection	0	0	0.160929	0.568359
GO:0071733~transcriptional activation by promoter-enhancer looping	0	0	0.160929	0.568359
GO:0010559~regulation of glycoprotein biosynthetic process	0	0	0.107286	0.546678
GO:0033159~negative regulation of protein import into nucleus, translocation	0	0	0.160929	0.568359
GO:0001655~urogenital system development	4.66043	3	0.643717	0.00961083
GO:0090102~cochlea development	1.55348	2	1.28743	0.212227
GO:0035019~somatic stem cell population maintenance	1.43398	5	3.4868	0.144422
GO:0043306~positive regulation of mast cell degranulation	0	0	0.590074	0.708387
GO:0045746~negative regulation of Notch signaling pathway	0	0	1.55565	0.879416
GO:2000114~regulation of establishment of cell polarity	2.19314	2	0.911933	0.119479
GO:0072179~nephric duct formation	0	0	0.107286	0.546678
GO:0061085~regulation of histone H3-K27 methylation	0	0	0.0536431	0.52391
GO:0060430~lung saccule development	0	0	0.321859	0.627382
GO:0019230~proprioception	0	0	0.160929	0.568359
GO:0003309~type B pancreatic cell differentiation	0	0	0.482788	0.678343
GO:0009268~response to pH	0	0	0.643717	0.722342
GO:0097066~response to thyroid hormone	3.10695	1	0.321859	0.142447
GO:1903052~positive regulation of proteolysis involved in cellular protein catabolic process	4.66043	1	0.214572	0.095428
GO:0097374~sensory neuron axon guidance	0	0	0.160929	0.568359
GO:0010596~negative regulation of endothelial cell migration	4.14261	4	0.965576	0.0052694
GO:0042035~regulation of cytokine biosynthetic process	0	0	0.375502	0.645207
GO:2000121~regulation of removal of superoxide radicals	0	0	0.375502	0.645207
GO:0001678~cellular glucose homeostasis	0	0	0.751003	0.748281
GO:0006554~lysine catabolic process	0	0	0.643717	0.722342
GO:2001243~negative regulation of intrinsic apoptotic signaling pathway	0	0	1.18015	0.829986
GO:0014916~regulation of lung blood pressure	0	0	0.107286	0.546678
GO:0045721~negative regulation of gluconeogenesis	0	0	0.751003	0.748281
GO:0009750~response to fructose	4.66043	1	0.214572	0.095428
GO:0033133~positive regulation of glucokinase activity	0	0	0.268215	0.608663
GO:0022037~metencephalon development	9.32086	1	0.107286	0.0478204
GO:0021537~telencephalon development	3.28972	3	0.911933	0.0261971
GO:0043983~histone H4-K12 acetylation	2.6631	1	0.375502	0.165639
GO:0007276~gamete generation	1.09657	1	0.911933	0.379754
GO:0032467~positive regulation of cytokinesis	0.503831	1	1.98479	0.685544
GO:0048729~tissue morphogenesis	6.21391	1	0.160929	0.0716761
GO:0010608~posttranscriptional regulation of gene expression	0	0	0.858289	0.7718
GO:0007602~phototransduction	0.690434	1	1.44836	0.553285
GO:0032259~methylation	1.27683	5	3.91595	0.202992
GO:0045444~fat cell differentiation	1.02146	4	3.91595	0.367191
GO:0032482~Rab protein signal transduction	0	0	0.107286	0.546678
GO:0051310~metaphase plate congression	0	0	0.643717	0.722342
GO:0006112~energy reserve metabolic process	1.24278	1	0.804646	0.339946
GO:0048485~sympathetic nervous system development	2.48556	2	0.804646	0.0957344
GO:0051297~centrosome organization	1.1298	2	1.77022	0.340429
GO:0090161~Golgi ribbon formation	0	0	0.590074	0.708387
GO:2000818~negative regulation of myoblast proliferation	0	0	0.107286	0.546678
GO:0001555~oocyte growth	0	0	0.160929	0.568359
GO:0003337~mesenchymal to epithelial transition involved in metanephros morphogenesis	0	0	0.375502	0.645207
GO:0072108~positive regulation of mesenchymal to epithelial transition involved in metanephros morphogenesis	0	0	0.214572	0.589004
GO:0006520~cellular amino acid metabolic process	0.932086	2	2.14572	0.437777
GO:0033580~protein galactosylation at cell surface	0	0	0.0536431	0.52391
GO:0006573~valine metabolic process	0	0	0.214572	0.589004
GO:0010447~response to acidic pH	0	0	0.643717	0.722342
GO:0060054~positive regulation of epithelial cell proliferation involved in wound healing	0	0	0.429145	0.662181
GO:0018146~keratan sulfate biosynthetic process	1.99733	3	1.50201	0.0952819
GO:0007341~penetration of zona pellucida	0	0	0.375502	0.645207
GO:0005989~lactose biosynthetic process	0	0	0.160929	0.568359
GO:0006749~glutathione metabolic process	0.332888	1	3.00401	0.845666
GO:0046427~positive regulation of JAK-STAT cascade	0.847351	1	1.18015	0.471879
GO:0007259~JAK-STAT cascade	0	0	1.71658	0.895929
GO:0006103~2-oxoglutarate metabolic process	0	0	0.965576	0.793124
GO:0006600~creatine metabolic process	0	0	0.590074	0.708387
GO:0046005~positive regulation of circadian sleep/wake cycle, REM sleep	0	0	0.160929	0.568359
GO:0043567~regulation of insulin-like growth factor receptor signaling pathway	0	0	0.375502	0.645207
GO:0032869~cellular response to insulin stimulus	0.968402	4	4.13052	0.406773
GO:0030252~growth hormone secretion	0	0	0.375502	0.645207
GO:0042536~negative regulation of tumor necrosis factor biosynthetic process	0	0	0.321859	0.627382
GO:0045409~negative regulation of interleukin-6 biosynthetic process	0	0	0.268215	0.608663
GO:0046697~decidualization	0	0	1.07286	0.812457
GO:0045923~positive regulation of fatty acid metabolic process	0	0	0.107286	0.546678
GO:0070328~triglyceride homeostasis	1.43398	2	1.39472	0.240397
GO:0043950~positive regulation of cAMP-mediated signaling	1.55348	1	0.643717	0.277233
GO:0043434~response to peptide hormone	1.27103	3	2.3603	0.254894
GO:0001947~heart looping	0.611204	2	3.27223	0.679766
GO:0038192~gastric inhibitory peptide signaling pathway	0	0	0.0536431	0.52391
GO:0010652~positive regulation of cell communication by chemical coupling	0	0	0.107286	0.546678
GO:0086055~Purkinje myocyte to ventricular cardiac muscle cell communication by electrical coupling	0	0	0.0536431	0.52391
GO:0051259~protein oligomerization	0.642818	2	3.1113	0.65074
GO:0035050~embryonic heart tube development	2.48556	2	0.804646	0.0957344
GO:0098905~regulation of bundle of His cell action potential	0	0	0.107286	0.546678
GO:0060713~labyrinthine layer morphogenesis	0	0	0.107286	0.546678
GO:0046167~glycerol-3-phosphate biosynthetic process	6.21391	1	0.160929	0.0716761
GO:0051900~regulation of mitochondrial depolarization	0	0	0.214572	0.589004
GO:0097069~cellular response to thyroxine stimulus	0	0	0.107286	0.546678
GO:0008637~apoptotic mitochondrial changes	0	0	1.01922	0.803027
GO:0071333~cellular response to glucose stimulus	1.43398	4	2.78944	0.16919
GO:0006750~glutathione biosynthetic process	0	0	0.858289	0.7718
GO:0019464~glycine decarboxylation via glycine cleavage system	0	0	0.160929	0.568359
GO:0060032~notochord regression	0	0	0.107286	0.546678
GO:0009953~dorsal/ventral pattern formation	1.16511	2	1.71658	0.326171
GO:0021696~cerebellar cortex morphogenesis	0	0	0.268215	0.608663
GO:0048566~embryonic digestive tract development	4.66043	4	0.858289	0.00332517
GO:0002076~osteoblast development	0	0	0.911933	0.782723
GO:0007389~pattern specification process	2.6631	4	1.50201	0.0261854
GO:0060594~mammary gland specification	18.6417	1	0.0536431	0.0239102
GO:1903010~regulation of bone development	18.6417	1	0.0536431	0.0239102
GO:0001656~metanephros development	1.38087	2	1.44836	0.254619
GO:0043200~response to amino acid	0.601346	1	1.66294	0.610886
GO:0006541~glutamine metabolic process	0.932086	1	1.07286	0.436314
GO:0006538~glutamate catabolic process	4.66043	1	0.214572	0.095428
GO:0006542~glutamine biosynthetic process	9.32086	1	0.107286	0.0478204
GO:0019673~GDP-mannose metabolic process	0	0	0.214572	0.589004
GO:0007194~negative regulation of adenylate cyclase activity	2.43153	3	1.23379	0.0585636
GO:0009313~oligosaccharide catabolic process	0	0	0.590074	0.708387
GO:0007213~G-protein coupled acetylcholine receptor signaling pathway	0	0	0.804646	0.760328
GO:0010762~regulation of fibroblast migration	0	0	0.536431	0.693733
GO:0060158~phospholipase C-activating dopamine receptor signaling pathway	0	0	0.536431	0.693733
GO:0050805~negative regulation of synaptic transmission	2.6631	1	0.375502	0.165639
GO:0007215~glutamate receptor signaling pathway	6.21391	5	0.804646	0.000268463
GO:0001508~action potential	0	0	0.911933	0.782723
GO:0016056~rhodopsin mediated signaling pathway	0	0	0.643717	0.722342
GO:0042254~ribosome biogenesis	0.517826	1	1.93115	0.674029
GO:0040032~post-embryonic body morphogenesis	0	0	0.0536431	0.52391
GO:0007603~phototransduction, visible light	2.0713	1	0.482788	0.211225
GO:0046549~retinal cone cell development	4.66043	2	0.429145	0.0289391
GO:2001223~negative regulation of neuron migration	4.14261	2	0.482788	0.0365656
GO:0035235~ionotropic glutamate receptor signaling pathway	3.10695	4	1.28743	0.0153108
GO:0008104~protein localization	0.305602	1	3.27223	0.872977
GO:0006533~aspartate catabolic process	0	0	0.214572	0.589004
GO:0097052~L-kynurenine metabolic process	0	0	0.160929	0.568359
GO:0010983~positive regulation of high-density lipoprotein particle clearance	0	0	0.107286	0.546678
GO:0061436~establishment of skin barrier	1.03565	1	0.965576	0.399033
GO:0046486~glycerolipid metabolic process	0	0	0.375502	0.645207
GO:0038003~opioid receptor signaling pathway	2.6631	1	0.375502	0.165639
GO:0002862~negative regulation of inflammatory response to antigenic stimulus	2.6631	1	0.375502	0.165639
GO:1900738~positive regulation of phospholipase C-activating G-protein coupled receptor signaling pathway	0	0	0.160929	0.568359
GO:0090200~positive regulation of release of cytochrome c from mitochondria	0	0	1.50201	0.873349
GO:0014068~positive regulation of phosphatidylinositol 3-kinase signaling	1.14718	4	3.4868	0.28833
GO:0001956~positive regulation of neurotransmitter secretion	6.21391	2	0.321859	0.0160424
GO:0031959~mineralocorticoid receptor signaling pathway	0	0	0.107286	0.546678
GO:0051055~negative regulation of lipid biosynthetic process	0	0	0.268215	0.608663
GO:0002031~G-protein coupled receptor internalization	0	0	0.643717	0.722342
GO:0035589~G-protein coupled purinergic nucleotide receptor signaling pathway	1.33155	1	0.751003	0.319432
GO:0032722~positive regulation of chemokine production	0	0	0.911933	0.782723
GO:0002385~mucosal immune response	0	0	0.268215	0.608663
GO:0002232~leukocyte chemotaxis involved in inflammatory response	0	0	0.107286	0.546678
GO:0008277~regulation of G-protein coupled receptor protein signaling pathway	1.91197	4	2.09208	0.0757262
GO:0010387~COP9 signalosome assembly	0	0	0.214572	0.589004
GO:0010269~response to selenium ion	2.33022	1	0.429145	0.188574
GO:0008631~intrinsic apoptotic signaling pathway in response to oxidative stress	1.24278	1	0.804646	0.339946
GO:0098869~cellular oxidant detoxification	0.532621	2	3.75502	0.7557
GO:0030949~positive regulation of vascular endothelial growth factor receptor signaling pathway	1.16511	1	0.858289	0.360057
GO:0050806~positive regulation of synaptic transmission	1.43398	1	0.69736	0.298524
GO:0051967~negative regulation of synaptic transmission, glutamatergic	4.14261	2	0.482788	0.0365656
GO:0001662~behavioral fear response	1.28564	2	1.55565	0.283216
GO:0007196~adenylate cyclase-inhibiting G-protein coupled glutamate receptor signaling pathway	5.32621	2	0.375502	0.0220809
GO:0031630~regulation of synaptic vesicle fusion to presynaptic membrane	0	0	0.160929	0.568359
GO:0035249~synaptic transmission, glutamatergic	1.7754	2	1.1265	0.171058
GO:0001964~startle response	3.72835	3	0.804646	0.0184366
GO:0007611~learning or memory	2.0713	4	1.93115	0.0593189
GO:0050770~regulation of axonogenesis	0.81051	1	1.23379	0.489015
GO:0003073~regulation of systemic arterial blood pressure	2.33022	1	0.429145	0.188574
GO:0005977~glycogen metabolic process	1.92845	3	1.55565	0.103574
GO:0035372~protein localization to microtubule	2.0713	1	0.482788	0.211225
GO:1904339~negative regulation of dopaminergic neuron differentiation	0	0	0.160929	0.568359
GO:1902174~positive regulation of keratinocyte apoptotic process	0	0	0.160929	0.568359
GO:1903689~regulation of wound healing, spreading of epidermal cells	0	0	0.0536431	0.52391
GO:0032873~negative regulation of stress-activated MAPK cascade	0	0	0.321859	0.627382
GO:0010800~positive regulation of peptidyl-threonine phosphorylation	0	0	1.44836	0.866978
GO:1903906~regulation of plasma membrane raft polarization	0	0	0.0536431	0.52391
GO:0051127~positive regulation of actin nucleation	0	0	0.482788	0.678343
GO:0060315~negative regulation of ryanodine-sensitive calcium-release channel activity	0	0	0.643717	0.722342
GO:0071460~cellular response to cell-matrix adhesion	0	0	0.107286	0.546678
GO:0033683~nucleotide-excision repair, DNA incision	0	0	2.03844	0.922487
GO:0016446~somatic hypermutation of immunoglobulin genes	0	0	0.858289	0.7718
GO:0006298~mismatch repair	0.532621	1	1.87751	0.662153
GO:0016447~somatic recombination of immunoglobulin gene segments	0	0	0.160929	0.568359
GO:0042795~snRNA transcription from RNA polymerase II promoter	0.26631	1	3.75502	0.911094
GO:0009303~rRNA transcription	1.55348	1	0.643717	0.277233
GO:0042791~5S class rRNA transcription from RNA polymerase III type 1 promoter	3.10695	1	0.321859	0.142447
GO:0006182~cGMP biosynthetic process	2.33022	2	0.858289	0.107405
GO:0042797~tRNA transcription from RNA polymerase III promoter	3.10695	1	0.321859	0.142447
GO:0007589~body fluid secretion	6.21391	3	0.482788	0.00395345
GO:0031284~positive regulation of guanylate cyclase activity	0	0	0.590074	0.708387
GO:0006185~dGDP biosynthetic process	0	0	0.0536431	0.52391
GO:0030214~hyaluronan catabolic process	0	0	0.804646	0.760328
GO:0005980~glycogen catabolic process	1.7754	2	1.1265	0.171058
GO:0045814~negative regulation of gene expression, epigenetic	0.745669	2	2.68215	0.564028
GO:2001190~positive regulation of T cell activation via T cell receptor contact with antigen bound to MHC molecule on antigen presenting cell	0	0	0.107286	0.546678
GO:0043392~negative regulation of DNA binding	0.665776	1	1.50201	0.5683
GO:0098532~histone H3-K27 trimethylation	3.10695	1	0.321859	0.142447
GO:0051321~meiotic cell cycle	0	0	1.82387	0.905663
GO:0006342~chromatin silencing	0.414261	1	2.41394	0.765536
GO:0031508~pericentric heterochromatin assembly	0	0	0.214572	0.589004
GO:0048477~oogenesis	1.99733	3	1.50201	0.0952819
GO:0060349~bone morphogenesis	1.38087	2	1.44836	0.254619
GO:0015671~oxygen transport	2.48556	2	0.804646	0.0957344
GO:0070293~renal absorption	0	0	0.214572	0.589004
GO:0018063~cytochrome c-heme linkage	0	0	0.0536431	0.52391
GO:0030218~erythrocyte differentiation	0.466043	1	2.14572	0.717989
GO:0008156~negative regulation of DNA replication	0	0	1.01922	0.803027
GO:0001975~response to amphetamine	2.40538	4	1.66294	0.0367926
GO:0006344~maintenance of chromatin silencing	0	0	0.214572	0.589004
GO:0003300~cardiac muscle hypertrophy	0	0	0.429145	0.662181
GO:0006548~histidine catabolic process	0	0	0.375502	0.645207
GO:0045187~regulation of circadian sleep/wake cycle, sleep	0	0	0.321859	0.627382
GO:1901652~response to peptide	3.38941	2	0.590074	0.0539238
GO:0061029~eyelid development in camera-type eye	5.73592	4	0.69736	0.00142719
GO:2000757~negative regulation of peptidyl-lysine acetylation	0	0	0.268215	0.608663
GO:0006476~protein deacetylation	0	0	0.536431	0.693733
GO:0055093~response to hyperoxia	0	0	0.911933	0.782723
GO:0032732~positive regulation of interleukin-1 production	0	0	0.214572	0.589004
GO:0006687~glycosphingolipid metabolic process	0.414261	1	2.41394	0.765536
GO:0032092~positive regulation of protein binding	1.22241	4	3.27223	0.249936
GO:1902947~regulation of tau-protein kinase activity	0	0	0.107286	0.546678
GO:0006689~ganglioside catabolic process	0	0	0.321859	0.627382
GO:2000272~negative regulation of receptor activity	0	0	0.321859	0.627382
GO:0097459~iron ion import into cell	0	0	0.107286	0.546678
GO:2000573~positive regulation of DNA biosynthetic process	0	0	0.69736	0.735629
GO:0070572~positive regulation of neuron projection regeneration	0	0	0.0536431	0.52391
GO:0021781~glial cell fate commitment	6.21391	1	0.160929	0.0716761
GO:0051155~positive regulation of striated muscle cell differentiation	2.6631	1	0.375502	0.165639
GO:0030948~negative regulation of vascular endothelial growth factor receptor signaling pathway	0	0	0.375502	0.645207
GO:0061419~positive regulation of transcription from RNA polymerase II promoter in response to hypoxia	0	0	0.214572	0.589004
GO:0061072~iris morphogenesis	0	0	0.536431	0.693733
GO:0019885~antigen processing and presentation of endogenous peptide antigen via MHC class I	0	0	0.375502	0.645207
GO:0071103~DNA conformation change	0	0	0.0536431	0.52391
GO:0010944~negative regulation of transcription by competitive promoter binding	3.72835	2	0.536431	0.0449102
GO:0061418~regulation of transcription from RNA polymerase II promoter in response to hypoxia	0	0	1.50201	0.873349
GO:0046835~carbohydrate phosphorylation	0.81051	1	1.23379	0.489015
GO:0001709~cell fate determination	2.0713	2	0.965576	0.131918
GO:2001187~positive regulation of CD8-positive, alpha-beta T cell activation	0	0	0.0536431	0.52391
GO:0001916~positive regulation of T cell mediated cytotoxicity	0	0	0.69736	0.735629
GO:0048704~embryonic skeletal system morphogenesis	1.43398	3	2.09208	0.200113
GO:0060017~parathyroid gland development	0	0	0.375502	0.645207
GO:0060435~bronchiole development	0	0	0.107286	0.546678
GO:0002381~immunoglobulin production involved in immunoglobulin mediated immune response	0	0	0.268215	0.608663
GO:0002455~humoral immune response mediated by circulating immunoglobulin	0	0	0.375502	0.645207
GO:0032689~negative regulation of interferon-gamma production	0	0	1.50201	0.873349
GO:0050870~positive regulation of T cell activation	1.03565	1	0.965576	0.399033
GO:0002504~antigen processing and presentation of peptide or polysaccharide antigen via MHC class II	0	0	0.911933	0.782723
GO:2001179~regulation of interleukin-10 secretion	0	0	0.160929	0.568359
[truncated: 9,360 more rows]

## Sheet: supplementary file 6b
Supplementary Table 6. HPO terms enriched within genes associated with modern human-derived fixed variants.
Pheno	HPO_ID	Enrichment	N_world	n_world	N_entered	Observed (n_entered)	Expected	P-value	FDR
Broad nasal tip	HP:0000455	3.69576	4293	121	240	25	6.7645	6.19e-09	3.85e-06
Long philtrum	HP:0000343	2.31412	4293	286	240	37	15.9888	7.49e-07	0.000233435
X-linked inheritance	HP:0001417	4.12788	4293	65	240	15	3.63382	1.77e-06	0.000339626
X-linked recessive inheritance	HP:0001419	2.70392	4293	172	240	26	9.61565	2.18e-06	0.000339626
Drooling	HP:0002307	3.76579	4293	76	240	16	4.24878	2.93e-06	0.000364474
Intellectual disability, moderate	HP:0002342	2.68312	4293	160	240	24	8.94479	6.33e-06	0.000656857
X-linked dominant inheritance	HP:0001423	3.85269	4293	65	240	14	3.63382	9.39e-06	0.00083529
Autistic behavior	HP:0000729	2.37913	4293	203	240	27	11.3487	1.64e-05	0.00127931
Thin upper lip vermilion	HP:0000219	2.35591	4293	205	240	27	11.4605	1.97e-05	0.00136433
Hyperactivity	HP:0000752	2.46724	4293	174	240	24	9.72746	2.72e-05	0.00169385
Depressed nasal bridge	HP:0005280	1.8534	4293	415	240	43	23.2006	3.38e-05	0.00191463
Clinodactyly of the 2nd toe	HP:0005824	5.03086	4293	32	240	9	1.78896	4.15e-05	0.00215263
Moderate sensorineural hearing impairment	HP:0008504	4.87841	4293	33	240	9	1.84486	5.43e-05	0.00260068
Widened subarachnoid space	HP:0012704	4.73493	4293	34	240	9	1.90077	7.03e-05	0.00291786
Aggressive behavior	HP:0000718	2.39193	4293	172	240	23	9.61565	6.64e-05	0.00291786
Broad thumb	HP:0011304	3.5775	4293	60	240	12	3.3543	8.97e-05	0.00349463
Poor speech	HP:0002465	2.23594	4293	200	240	25	11.181	9.84e-05	0.00360638
Thick lower lip vermilion	HP:0000179	2.50175	4293	143	240	20	7.99441	0.000107509	0.003721
Mild neurosensory hearing impairment	HP:0008587	4.47187	4293	36	240	9	2.01258	0.000114262	0.00374659
Periorbital fullness	HP:0000629	3.7125	4293	53	240	11	2.96296	0.000124546	0.00387962
2-3 toe syndactyly	HP:0004691	3.1424	4293	74	240	13	4.13697	0.00018476	0.00548121
Shortening of all distal phalanges of the fingers	HP:0006118	4.02469	4293	40	240	9	2.2362	0.000272576	0.00771887
Anteverted ears	HP:0040080	10.2214	4293	7	240	4	0.391335	0.000291754	0.00790273
Aplasia/Hypoplasia of the external ear	HP:0008772	13.4156	4293	4	240	3	0.22362	0.000662048	0.0171857
Large forehead	HP:0002003	6.38839	4293	14	240	5	0.782669	0.000691361	0.0172287
Tapered finger	HP:0001182	2.73574	4293	85	240	13	4.75192	0.000751753	0.0180132
Intellectual disability, severe	HP:0010864	1.80037	4293	308	240	31	17.2187	0.000798468	0.0184239
Long palpebral fissure	HP:0000637	2.98125	4293	66	240	11	3.68973	0.000919562	0.0204603
Agenesis of cerebellar vermis	HP:0002335	7.95	4293	9	240	4	0.503145	0.000960424	0.0206326
Urinary incontinence	HP:0000020	2.26931	4293	134	240	17	7.49126	0.0011197	0.0232525
Thick eyebrow	HP:0000574	2.50425	4293	100	240	14	5.5905	0.00116997	0.0235127
Meckel diverticulum	HP:0002245	3.03178	4293	59	240	10	3.29839	0.00137025	0.0251079
Self-injurious behavior	HP:0100716	2.85163	4293	69	240	11	3.85744	0.00134561	0.0251079
Posteriorly rotated ears	HP:0000358	2.06792	4293	173	240	20	9.67156	0.00136527	0.0251079
Mesoaxial hand polydactyly	HP:0006159	10.7325	4293	5	240	3	0.279525	0.00158673	0.026717
High-pitched cry	HP:0025430	10.7325	4293	5	240	3	0.279525	0.00158673	0.026717
Snoring	HP:0025267	10.7325	4293	5	240	3	0.279525	0.00158673	0.026717
Absence seizure	HP:0002121	2.4738	4293	94	240	13	5.25507	0.0019548	0.0316788
Long face	HP:0000276	1.9986	4293	179	240	20	10.007	0.00207396	0.0316788
Intellectual disability, mild	HP:0001256	1.80963	4293	257	240	26	14.3676	0.00199606	0.0316788
Low-set ears	HP:0000369	1.5604	4293	470	240	41	26.2753	0.0020848	0.0316788
Pyloric stenosis	HP:0002021	2.23594	4293	120	240	15	6.7086	0.00252503	0.0374545
White forelock	HP:0002211	5.9625	4293	12	240	4	0.67086	0.0033013	0.0457046
Congenital microcephaly	HP:0011451	4.70724	4293	19	240	5	1.06219	0.00318904	0.0457046
Macrocephaly	HP:0000256	1.66654	4293	322	240	30	18.0014	0.00329718	0.0457046
Chronic constipation	HP:0012450	3.83304	4293	28	240	6	1.56534	0.00381493	0.0506098
Brachydactyly	HP:0001156	1.68636	4293	297	240	28	16.6038	0.00381808	0.0506098
Strabismus	HP:0000486	1.41498	4293	670	240	53	37.4563	0.00401463	0.0521066
Heterochromia iridis	HP:0001100	5.50385	4293	13	240	4	0.726765	0.00456166	0.0557237
Bruxism	HP:0003763	5.50385	4293	13	240	4	0.726765	0.00456166	0.0557237
Synophrys	HP:0000664	2.25765	4293	103	240	13	5.75821	0.00443513	0.0557237
Hearing impairment	HP:0000365	1.4602	4293	539	240	44	30.1328	0.00514083	0.0615912
Postnatal growth retardation	HP:0008897	2.10441	4293	119	240	14	6.65269	0.00605273	0.0691223
Small for gestational age	HP:0001518	1.93686	4293	157	240	17	8.77708	0.00610229	0.0691223
Wide nasal bridge	HP:0000431	1.52234	4293	423	240	36	23.6478	0.00598394	0.0691223
Buphthalmos	HP:0000557	4.06534	4293	22	240	5	1.22991	0.00629445	0.0700258
Facial asymmetry	HP:0000324	2.15313	4293	108	240	13	6.03774	0.00665351	0.0727217
Central adrenal insufficiency	HP:0011734	6.70781	4293	8	240	3	0.44724	0.00783462	0.0774757
Aplasia/hypoplasia of the uterus	HP:0008684	6.70781	4293	8	240	3	0.44724	0.00783462	0.0774757
Metacarpal synostosis	HP:0009701	6.70781	4293	8	240	3	0.44724	0.00783462	0.0774757
Premature graying of hair	HP:0002216	3.35391	4293	32	240	6	1.78896	0.00760882	0.0774757
Abnormality of the dentition	HP:0000164	1.9875	4293	135	240	15	7.54717	0.00774428	0.0774757
Attention deficit hyperactivity disorder	HP:0007018	1.70711	4293	241	240	23	13.4731	0.00741745	0.0774757
Macroorchidism	HP:0000053	4.77	4293	15	240	4	0.838574	0.00797143	0.0775969
Global developmental delay	HP:0001263	1.2257	4293	1401	240	96	78.3229	0.0081301	0.0779239
Delayed eruption of teeth	HP:0000684	1.97289	4293	136	240	15	7.60307	0.00827982	0.0781565
Obesity	HP:0001513	1.56718	4293	331	240	29	18.5045	0.00915023	0.0850835
Midface retrusion	HP:0011800	1.69623	4293	232	240	22	12.97	0.00942662	0.0863645
Telecanthus	HP:0000506	1.9875	4293	126	240	14	7.04403	0.00995085	0.0898461
Full cheeks	HP:0000293	2.10441	4293	102	240	12	5.70231	0.0107258	0.0954594
Intellectual disability, profound	HP:0002187	2.08398	4293	103	240	12	5.75821	0.0115553	0.101394
Delayed speech and language development	HP:0000750	1.42953	4293	488	240	39	27.2816	0.0119833	0.103689
Abnormal auditory evoked potentials	HP:0006958	5.36625	4293	10	240	3	0.55905	0.0154464	0.128308
Shyness	HP:0100962	5.36625	4293	10	240	3	0.55905	0.0154464	0.128308
Generalized tonic seizures	HP:0010818	3.3125	4293	27	240	5	1.50943	0.0153654	0.128308
Craniosynostosis	HP:0001363	1.9875	4293	108	240	12	6.03774	0.0164682	0.133243
Mandibular prognathia	HP:0000303	1.82526	4293	147	240	15	8.21803	0.0163372	0.133243
Overlapping toe	HP:0001845	2.82434	4293	38	240	6	2.12439	0.0175308	0.13825
Cerebral palsy	HP:0100021	2.82434	4293	38	240	6	2.12439	0.0175308	0.13825
Atrioventricular canal defect	HP:0006695	3.1942	4293	28	240	5	1.56534	0.0178764	0.139212
Aplasia/Hypoplasia of the macula	HP:0008059	4.87841	4293	11	240	3	0.614955	0.0203759	0.139887
Sleep-wake cycle disturbance	HP:0006979	4.87841	4293	11	240	3	0.614955	0.0203759	0.139887
Venous insufficiency	HP:0005293	4.87841	4293	11	240	3	0.614955	0.0203759	0.139887
Prominent glabella	HP:0002057	4.87841	4293	11	240	3	0.614955	0.0203759	0.139887
Thyroid hypoplasia	HP:0005990	4.87841	4293	11	240	3	0.614955	0.0203759	0.139887
Fibular hypoplasia	HP:0003038	3.76579	4293	19	240	4	1.06219	0.0189859	0.139887
Deep philtrum	HP:0002002	2.75192	4293	39	240	6	2.18029	0.0197798	0.139887
Reticulocytosis	HP:0001923	2.75192	4293	39	240	6	2.18029	0.0197798	0.139887
Renal hypoplasia/aplasia	HP:0008678	2.20531	4293	73	240	9	4.08106	0.0193869	0.139887
Hirsutism	HP:0001007	2.10441	4293	85	240	10	4.75192	0.0191066	0.139887
Somatic mutation	HP:0001428	1.7769	4293	151	240	15	8.44165	0.020433	0.139887
Upslanted palpebral fissure	HP:0000582	1.61878	4293	221	240	20	12.355	0.0209224	0.141681
Misalignment of teeth	HP:0000692	3.5775	4293	20	240	4	1.1181	0.022717	0.148208
Heart murmur	HP:0030148	3.5775	4293	20	240	4	1.1181	0.022717	0.148208
Low anterior hairline	HP:0000294	2.27143	4293	63	240	8	3.52201	0.0228378	0.148208
Blepharophimosis	HP:0000581	1.96762	4293	100	240	11	5.5905	0.0227098	0.148208
Premature ovarian insufficiency	HP:0008209	2.40793	4293	52	240	7	2.90706	0.0242683	0.155868
Proportionate short stature	HP:0003508	4.47187	4293	12	240	3	0.67086	0.0260675	0.165715
Scaphocephaly	HP:0030799	3.40714	4293	21	240	4	1.174	0.0268641	0.169054
Brachycephaly	HP:0000248	1.67368	4293	171	240	16	9.55975	0.0281313	0.175258
Hypohidrosis	HP:0000966	2.16818	4293	66	240	8	3.68973	0.0293623	0.180235
Sleep disturbance	HP:0002360	1.66395	4293	172	240	16	9.61565	0.0295089	0.180235
Atrial flutter	HP:0004749	4.12788	4293	13	240	3	0.726765	0.0325192	0.182518
Dysuria	HP:0100518	4.12788	4293	13	240	3	0.726765	0.0325192	0.182518
Persistence of primary teeth	HP:0006335	4.12788	4293	13	240	3	0.726765	0.0325192	0.182518
Abnormality of the pulmonary artery	HP:0004414	4.12788	4293	13	240	3	0.726765	0.0325192	0.182518
Tarsal synostosis	HP:0008368	3.25227	4293	22	240	4	1.22991	0.0314352	0.182518
Diffuse cerebral atrophy	HP:0002506	2.79492	4293	32	240	5	1.78896	0.0305746	0.182518
Pointed chin	HP:0000307	2.13582	4293	67	240	8	3.74563	0.0317964	0.182518
Everted lower lip vermilion	HP:0000232	1.87393	4293	105	240	11	5.87002	0.0312991	0.182518
Abnormality of cardiovascular system morphology	HP:0030680	1.64483	4293	174	240	16	9.72746	0.0324137	0.182518
External ear malformation	HP:0008572	2.01234	4293	80	240	9	4.4724	0.0330722	0.18291
Narrow forehead	HP:0000341	1.92339	4293	93	240	10	5.19916	0.0334699	0.18291
Infantile muscular hypotonia	HP:0008947	1.85625	4293	106	240	11	5.92593	0.0332625	0.18291
Angina pectoris	HP:0001681	2.71023	4293	33	240	5	1.84486	0.0344494	0.183436
Intention tremor	HP:0002080	2.10441	4293	68	240	8	3.80154	0.0343654	0.183436
Micropenis	HP:0000054	1.559	4293	218	240	19	12.1873	0.0339409	0.183436
Flat face	HP:0012368	1.9875	4293	81	240	9	4.5283	0.0354644	0.18412
Retinal detachment	HP:0000541	1.9875	4293	81	240	9	4.5283	0.0354644	0.18412
Downslanted palpebral fissures	HP:0000494	1.39746	4293	384	240	30	21.4675	0.0350957	0.18412
Irregular vertebral endplates	HP:0003301	3.11087	4293	23	240	4	1.28581	0.0364355	0.185338
Renal artery stenosis	HP:0001920	3.11087	4293	23	240	4	1.28581	0.0364355	0.185338
Frontal bossing	HP:0002007	1.44721	4293	309	240	25	17.2746	0.0365915	0.185338
Broad hallux	HP:0010055	2.385	4293	45	240	6	2.51572	0.0374372	0.18593
Prominent nasal bridge	HP:0000426	1.61695	4293	177	240	16	9.89518	0.0371592	0.18593
Absent speech	HP:0001344	1.56299	4293	206	240	18	11.5164	0.0376039	0.18593
Mitral regurgitation	HP:0001653	1.88289	4293	95	240	10	5.31097	0.0380037	0.186428
Narrow palpebral fissure	HP:0045025	2.63051	4293	34	240	5	1.90077	0.0386155	0.186492
Short chin	HP:0000331	2.63051	4293	34	240	5	1.90077	0.0386155	0.186492
Abnormal hair pattern	HP:0010720	3.83304	4293	14	240	3	0.782669	0.0397218	0.187475
Follicular thyroid carcinoma	HP:0006731	3.83304	4293	14	240	3	0.782669	0.0397218	0.187475
Vitreoretinopathy	HP:0007773	3.83304	4293	14	240	3	0.782669	0.0397218	0.187475
Epileptic encephalopathy	HP:0200134	1.86328	4293	96	240	10	5.36688	0.040423	0.18935
Osteoarthritis	HP:0002758	2.33315	4293	46	240	6	2.57163	0.0411201	0.191178
Cataract	HP:0000518	1.2953	4293	580	240	42	32.4249	0.0422405	0.194932
Anteverted nares	HP:0000463	1.36894	4293	392	240	30	21.9147	0.0444742	0.203731
Hypercholesterolemia	HP:0003124	2.28351	4293	47	240	6	2.62753	0.0450244	0.204746
Tall stature	HP:0000098	1.9875	4293	72	240	8	4.02516	0.0460416	0.207854
Thyroid adenoma	HP:0000854	3.5775	4293	15	240	3	0.838574	0.0476594	0.207958
Glucose intolerance	HP:0001952	3.5775	4293	15	240	3	0.838574	0.0476594	0.207958
High anterior hairline	HP:0009890	2.862	4293	25	240	4	1.39762	0.0477335	0.207958
Recurrent infections	HP:0002719	1.70357	4293	126	240	12	7.04403	0.0475563	0.207958
Broad forehead	HP:0000337	1.70357	4293	126	240	12	7.04403	0.0475563	0.207958
Cryptorchidism	HP:0000028	1.27768	4293	602	240	43	33.6548	0.048534	0.209977
Microtia	HP:0008551	1.78875	4293	100	240	10	5.5905	0.051156	0.219794
Self-mutilation	HP:0000742	2.75192	4293	26	240	4	1.45353	0.0540301	0.220005
Brisk reflexes	HP:0001348	2.75192	4293	26	240	4	1.45353	0.0540301	0.220005
Slow saccadic eye movements	HP:0000514	2.75192	4293	26	240	4	1.45353	0.0540301	0.220005
Urethral stenosis	HP:0008661	2.75192	4293	26	240	4	1.45353	0.0540301	0.220005
Pituitary hypothyroidism	HP:0008245	2.75192	4293	26	240	4	1.45353	0.0540301	0.220005
Abnormal heart morphology	HP:0001627	2.05266	4293	61	240	7	3.4102	0.051943	0.220005
Kyphoscoliosis	HP:0002751	1.63759	4293	142	240	13	7.9385	0.0524354	0.220005
Atrial septal defect	HP:0001631	1.44476	4293	260	240	21	14.5353	0.0537567	0.220005
Supravalvular aortic stenosis	HP:0004381	3.35391	4293	16	240	3	0.894479	0.0563108	0.22496
Hypoplastic ilia	HP:0000946	3.35391	4293	16	240	3	0.894479	0.0563108	0.22496
Decreased antibody level in blood	HP:0004313	1.908	4293	75	240	8	4.19287	0.0563302	0.22496
Neoplasm	HP:0002664	2.1465	4293	50	240	6	2.79525	0.0580889	0.226184
Epileptic spasms	HP:0011097	2.1465	4293	50	240	6	2.79525	0.0580889	0.226184
Depressed nasal ridge	HP:0000457	1.69623	4293	116	240	11	6.48498	0.0578733	0.226184
Babinski sign	HP:0003487	1.48376	4293	217	240	18	12.1314	0.0576326	0.226184
Palmoplantar hyperkeratosis	HP:0000972	2.65	4293	27	240	4	1.50943	0.0607544	0.226949
Neoplasm of the lung	HP:0100526	2.65	4293	27	240	4	1.50943	0.0607544	0.226949
Hyperventilation	HP:0002883	2.65	4293	27	240	4	1.50943	0.0607544	0.226949
Renal dysplasia	HP:0000110	1.9875	4293	63	240	7	3.52201	0.0600243	0.226949
Dental crowding	HP:0000678	1.88289	4293	76	240	8	4.24878	0.0600606	0.226949
Bifid uvula	HP:0000193	1.73665	4293	103	240	10	5.75821	0.0603537	0.226949
Cleft palate	HP:0000175	1.31586	4293	435	240	32	24.3187	0.0608354	0.226949
Coarse facial features	HP:0000280	1.51429	4293	189	240	16	10.566	0.0612324	0.22707
Short middle phalanx of the 5th finger	HP:0004220	3.15662	4293	17	240	3	0.950384	0.0656501	0.228492
Short columella	HP:0002000	3.15662	4293	17	240	3	0.950384	0.0656501	0.228492
Exostoses	HP:0100777	3.15662	4293	17	240	3	0.950384	0.0656501	0.228492
Broad phalanx of the toes	HP:0010174	3.15662	4293	17	240	3	0.950384	0.0656501	0.228492
Peters anomaly	HP:0000659	3.15662	4293	17	240	3	0.950384	0.0656501	0.228492
Broad hallux phalanx	HP:0010059	3.15662	4293	17	240	3	0.950384	0.0656501	0.228492
Microglossia	HP:0000171	3.15662	4293	17	240	3	0.950384	0.0656501	0.228492
Impaired platelet aggregation	HP:0003540	3.15662	4293	17	240	3	0.950384	0.0656501	0.228492
Preauricular pit	HP:0004467	2.29327	4293	39	240	5	2.18029	0.0639087	0.228492
Accelerated skeletal maturation	HP:0005616	1.95645	4293	64	240	7	3.57792	0.0643395	0.228492
Congenital diaphragmatic hernia	HP:0000776	1.85844	4293	77	240	8	4.30468	0.0639433	0.228492
Thickened calvaria	HP:0002684	2.55536	4293	28	240	4	1.56534	0.0679008	0.231159
Spastic diplegia	HP:0001264	2.55536	4293	28	240	4	1.56534	0.0679008	0.231159
Increased antibody level in blood	HP:0010702	2.55536	4293	28	240	4	1.56534	0.0679008	0.231159
Ectopia lentis	HP:0001083	2.55536	4293	28	240	4	1.56534	0.0679008	0.231159
Short tibia	HP:0005736	2.98125	4293	18	240	3	1.00629	0.0756481	0.234472
Pierre-Robin sequence	HP:0000201	2.98125	4293	18	240	3	1.00629	0.0756481	0.234472
Cutaneous syndactyly	HP:0012725	2.98125	4293	18	240	3	1.00629	0.0756481	0.234472
Alveolar cell carcinoma	HP:0006519	2.98125	4293	18	240	3	1.00629	0.0756481	0.234472
Enlarged polycystic ovaries	HP:0008675	2.98125	4293	18	240	3	1.00629	0.0756481	0.234472
Arthropathy	HP:0003040	2.98125	4293	18	240	3	1.00629	0.0756481	0.234472
Hamartoma of tongue	HP:0011802	2.98125	4293	18	240	3	1.00629	0.0756481	0.234472
Albinism	HP:0001022	2.98125	4293	18	240	3	1.00629	0.0756481	0.234472
Broad finger	HP:0001500	2.98125	4293	18	240	3	1.00629	0.0756481	0.234472
Large earlobe	HP:0009748	2.98125	4293	18	240	3	1.00629	0.0756481	0.234472
Coronal craniosynostosis	HP:0004440	2.98125	4293	18	240	3	1.00629	0.0756481	0.234472
Hypoplasia of the iris	HP:0007676	2.98125	4293	18	240	3	1.00629	0.0756481	0.234472
Long fingers	HP:0100807	2.46724	4293	29	240	4	1.62124	0.0754618	0.234472
Profound global developmental delay	HP:0012736	2.23594	4293	40	240	5	2.2362	0.0698646	0.234472
Long eyelashes	HP:0000527	1.81139	4293	79	240	8	4.41649	0.0721691	0.234472
Stereotypy	HP:0000733	1.60187	4293	134	240	12	7.49126	0.0696987	0.234472
Short philtrum	HP:0000322	1.52698	4293	164	240	14	9.16841	0.0727486	0.234472
Short nose	HP:0003196	1.41403	4293	253	240	20	14.144	0.0704142	0.234472
Ectopic kidney	HP:0000086	2.1814	4293	41	240	5	2.2921	0.0761166	0.234755
Talipes equinovarus	HP:0001762	1.39746	4293	256	240	20	14.3117	0.0774368	0.237651
Generalized-onset seizure	HP:0002197	1.86884	4293	67	240	7	3.74563	0.0783904	0.238022
Generalized tonic-clonic seizures	HP:0002069	1.50858	4293	166	240	14	9.28022	0.078704	0.238022
Splenomegaly	HP:0001744	1.33888	4293	334	240	25	18.6723	0.0781849	0.238022
Dysdiadochokinesis	HP:0002075	2.12946	4293	42	240	5	2.34801	0.0826615	0.247587
Abnormal hair morphology	HP:0001595	2.12946	4293	42	240	5	2.34801	0.0826615	0.247587
Severely reduced visual acuity	HP:0001141	2.385	4293	30	240	4	1.67715	0.0834285	0.248689
Autism	HP:0000717	1.46619	4293	183	240	15	10.2306	0.0852406	0.252881
Dysmetric saccades	HP:0000641	2.82434	4293	19	240	3	1.06219	0.0862723	0.253435
Poor coordination	HP:0002370	2.82434	4293	19	240	3	1.06219	0.0862723	0.253435
Flat occiput	HP:0005469	2.07994	4293	43	240	5	2.40391	0.0894956	0.253435
Sparse pubic hair	HP:0002225	2.07994	4293	43	240	5	2.40391	0.0894956	0.253435
Aniridia	HP:0000526	2.07994	4293	43	240	5	2.40391	0.0894956	0.253435
Incoordination	HP:0002311	2.07994	4293	43	240	5	2.40391	0.0894956	0.253435
Impotence	HP:0000802	2.07994	4293	43	240	5	2.40391	0.0894956	0.253435
Postural tremor	HP:0002174	2.07994	4293	43	240	5	2.40391	0.0894956	0.253435
Wide anterior fontanel	HP:0000260	1.81467	4293	69	240	7	3.85744	0.0886778	0.253435
Micrognathia	HP:0000347	1.2369	4293	564	240	39	31.5304	0.0878164	0.253435
Hypoplasia of the maxilla	HP:0000327	1.61149	4293	111	240	10	6.20545	0.0899027	0.253436
Tricuspid regurgitation	HP:0005180	2.30806	4293	31	240	4	1.73305	0.0917903	0.256437
Increased number of teeth	HP:0011069	2.30806	4293	31	240	4	1.73305	0.0917903	0.256437
Plagiocephaly	HP:0001357	1.78875	4293	70	240	7	3.91335	0.0940955	0.261703
Periventricular leukomalacia	HP:0006970	2.68312	4293	20	240	3	1.1181	0.097488	0.266382
Growth hormone excess	HP:0000845	2.68312	4293	20	240	3	1.1181	0.097488	0.266382
Elbow dislocation	HP:0003042	1.88289	4293	57	240	6	3.18658	0.0965358	0.266382
Short neck	HP:0000470	1.34637	4293	279	240	21	15.5975	0.0967145	0.266382
Gonadal dysgenesis	HP:0000133	2.23594	4293	32	240	4	1.78896	0.100535	0.268838
Bicuspid aortic valve	HP:0001647	1.76356	4293	71	240	7	3.96925	0.0996942	0.268838
Increased intracranial pressure	HP:0002516	1.76356	4293	71	240	7	3.96925	0.0996942	0.268838
Delayed gross motor development	HP:0002194	1.68353	4293	85	240	8	4.75192	0.100545	0.268838
Oculomotor apraxia	HP:0000657	1.68353	4293	85	240	8	4.75192	0.100545	0.268838
Hallux valgus	HP:0001822	1.9875	4293	45	240	5	2.51572	0.104011	0.27574
Optic nerve hypoplasia	HP:0000609	1.9875	4293	45	240	5	2.51572	0.104011	0.27574
Abnormality of epiphysis morphology	HP:0005930	1.66395	4293	86	240	8	4.80783	0.105809	0.279318
Hypoplastic scapulae	HP:0000882	2.55536	4293	21	240	3	1.174	0.109259	0.280807
Streak ovary	HP:0010464	2.55536	4293	21	240	3	1.174	0.109259	0.280807
Myelomeningocele	HP:0002475	2.55536	4293	21	240	3	1.174	0.109259	0.280807
Retinal coloboma	HP:0000480	2.55536	4293	21	240	3	1.174	0.109259	0.280807
Decreased body weight	HP:0004325	1.81907	4293	59	240	6	3.29839	0.109528	0.280807
Aganglionic megacolon	HP:0002251	1.55543	4293	115	240	10	6.42907	0.107461	0.280807
Patent ductus arteriosus	HP:0001643	1.3643	4293	236	240	18	13.1936	0.107813	0.280807
Polyphagia	HP:0002591	1.94429	4293	46	240	5	2.57163	0.111681	0.282907
Short foot	HP:0001773	1.54203	4293	116	240	10	6.48498	0.112139	0.282907
Oligohydramnios	HP:0001562	1.54203	4293	116	240	10	6.48498	0.112139	0.282907
Malar flattening	HP:0000272	1.40478	4293	191	240	15	10.6778	0.112164	0.282907
Hydronephrosis	HP:0000126	1.42287	4293	176	240	14	9.83927	0.113137	0.284211
Hypoplasia of the corpus callosum	HP:0002079	1.28134	4293	349	240	25	19.5108	0.114767	0.287149
Metaphyseal irregularity	HP:0003025	2.10441	4293	34	240	4	1.90077	0.119122	0.293332
Taurodontia	HP:0000679	2.10441	4293	34	240	4	1.90077	0.119122	0.293332
Increased circulating gonadotropin level	HP:0000837	2.10441	4293	34	240	4	1.90077	0.119122	0.293332
Highly arched eyebrow	HP:0002553	1.49063	4293	132	240	11	7.37945	0.117955	0.293332
Macrogyria	HP:0007227	2.4392	4293	22	240	3	1.22991	0.121546	0.296955
Palpebral edema	HP:0100540	2.4392	4293	22	240	3	1.22991	0.121546	0.296955
Small hand	HP:0200055	1.60787	4293	89	240	8	4.97554	0.1225	0.297111
Hypsarrhythmia	HP:0002521	1.45034	4293	148	240	12	8.27393	0.122564	0.297111
Partial agenesis of the corpus callosum	HP:0001338	2.04429	4293	35	240	4	1.95667	0.128934	0.299724
Abnormality of dental morphology	HP:0006482	2.04429	4293	35	240	4	1.95667	0.128934	0.299724
Prominent supraorbital ridges	HP:0000336	2.04429	4293	35	240	4	1.95667	0.128934	0.299724
Genu varum	HP:0002970	1.86328	4293	48	240	5	2.68344	0.127809	0.299724
Truncal ataxia	HP:0002078	1.86328	4293	48	240	5	2.68344	0.127809	0.299724
Micromelia	HP:0002983	1.54796	4293	104	240	9	5.81412	0.125387	0.299724
Arthralgia	HP:0002829	1.4406	4293	149	240	12	8.32984	0.127035	0.299724
Macrotia	HP:0000400	1.39902	4293	179	240	14	10.007	0.124985	0.299724
Cerebellar hypoplasia	HP:0001321	1.37596	4293	195	240	15	10.9015	0.127354	0.299724
Microcephaly	HP:0000252	1.14713	4293	920	240	59	51.4326	0.127025	0.299724
Intellectual disability	HP:0001249	1.11625	4293	1298	240	81	72.5646	0.126013	0.299724
Stillbirth	HP:0003826	2.33315	4293	23	240	3	1.28581	0.134313	0.305391
Death in childhood	HP:0003819	2.33315	4293	23	240	3	1.28581	0.134313	0.305391
Soft skin	HP:0000977	2.33315	4293	23	240	3	1.28581	0.134313	0.305391
Rectal prolapse	HP:0002035	2.33315	4293	23	240	3	1.28581	0.134313	0.305391
Increased LDL cholesterol concentration	HP:0003141	2.33315	4293	23	240	3	1.28581	0.134313	0.305391
Protuberant abdomen	HP:0001538	2.33315	4293	23	240	3	1.28581	0.134313	0.305391
Acne	HP:0001061	1.82526	4293	49	240	5	2.73934	0.136253	0.308674
Mask-like facies	HP:0000298	1.70357	4293	63	240	6	3.52201	0.13803	0.310443
Amblyopia	HP:0000646	1.70357	4293	63	240	6	3.52201	0.13803	0.310443
Echolalia	HP:0010529	1.9875	4293	36	240	4	2.01258	0.139072	0.311661
Gait ataxia	HP:0002066	1.41217	4293	152	240	12	8.49755	0.140991	0.314829
Glossoptosis	HP:0000162	2.23594	4293	24	240	3	1.34172	0.14752	0.318009
Restlessness	HP:0000711	2.23594	4293	24	240	3	1.34172	0.14752	0.318009
Mesomelia	HP:0003027	2.23594	4293	24	240	3	1.34172	0.14752	0.318009
Impaired smooth pursuit	HP:0007772	2.23594	4293	24	240	3	1.34172	0.14752	0.318009
Secondary amenorrhea	HP:0000869	1.78875	4293	50	240	5	2.79525	0.144937	0.318009
Bilateral single transverse palmar creases	HP:0007598	1.67695	4293	64	240	6	3.57792	0.145653	0.318009
Dental malocclusion	HP:0000689	1.53871	4293	93	240	8	5.19916	0.146778	0.318009
Retrognathia	HP:0000278	1.36101	4293	184	240	14	10.2865	0.146261	0.318009
Growth delay	HP:0001510	1.33116	4293	215	240	16	12.0196	0.145007	0.318009
Abnormal facial shape	HP:0001999	1.33116	4293	215	240	16	12.0196	0.145007	0.318009
Bone spicule pigmentation of the retina	HP:0007737	2.1465	4293	25	240	3	1.39762	0.161127	0.327651
Bilateral cryptorchidism	HP:0008689	2.1465	4293	25	240	3	1.39762	0.161127	0.327651
Focal seizures, afebril	HP:0040168	2.1465	4293	25	240	3	1.39762	0.161127	0.327651
Adrenal hypoplasia	HP:0000835	2.1465	4293	25	240	3	1.39762	0.161127	0.327651
Pancreatic cysts	HP:0001737	2.1465	4293	25	240	3	1.39762	0.161127	0.327651
Disproportionate tall stature	HP:0001519	2.1465	4293	25	240	3	1.39762	0.161127	0.327651
Colitis	HP:0002583	2.1465	4293	25	240	3	1.39762	0.161127	0.327651
Excessive wrinkled skin	HP:0007392	2.1465	4293	25	240	3	1.39762	0.161127	0.327651
Enlarged kidney	HP:0000105	2.1465	4293	25	240	3	1.39762	0.161127	0.327651
Abnormality of the optic disc	HP:0012795	2.1465	4293	25	240	3	1.39762	0.161127	0.327651
Prominent metopic ridge	HP:0005487	1.88289	4293	38	240	4	2.12439	0.160255	0.327651
Metatarsus adductus	HP:0001840	1.88289	4293	38	240	4	2.12439	0.160255	0.327651
Underdeveloped supraorbital ridges	HP:0009891	1.75368	4293	51	240	5	2.85115	0.153855	0.327651
Coxa valga	HP:0002673	1.62614	4293	66	240	6	3.68973	0.161459	0.327651
Limb ataxia	HP:0002070	1.62614	4293	66	240	6	3.68973	0.161459	0.327651
Focal-onset seizure	HP:0007359	1.56516	4293	80	240	7	4.4724	0.157853	0.327651
Pulmonic stenosis	HP:0001642	1.52234	4293	94	240	8	5.25507	0.153194	0.327651
Facial palsy	HP:0010628	1.36787	4293	170	240	13	9.50384	0.153368	0.327651
Narrow face	HP:0000275	1.54583	4293	81	240	7	4.5283	0.165122	0.332131
Microcornea	HP:0000482	1.41964	4293	126	240	10	7.04403	0.16503	0.332131
High palate	HP:0000218	1.19002	4293	481	240	32	26.8903	0.165266	0.332131
Acute myeloid leukemia	HP:0004808	1.83462	4293	39	240	4	2.18029	0.171266	0.341983
Almond-shaped palpebral fissure	HP:0007874	1.83462	4293	39	240	4	2.18029	0.171266	0.341983
Camptodactyly	HP:0012385	1.43739	4293	112	240	9	6.26136	0.172523	0.343392
Finger clinodactyly	HP:0040019	2.06394	4293	26	240	3	1.45353	0.175096	0.344116
Congenital hypothyroidism	HP:0000851	2.06394	4293	26	240	3	1.45353	0.175096	0.344116
Meningioma	HP:0002858	2.06394	4293	26	240	3	1.45353	0.175096	0.344116
Elevated circulating follicle stimulating hormone level	HP:0008232	2.06394	4293	26	240	3	1.45353	0.175096	0.344116
Pulmonary hypoplasia	HP:0002089	1.42467	4293	113	240	9	6.31726	0.178933	0.349452
Ventricular septal defect	HP:0001629	1.22977	4293	320	240	22	17.8896	0.178921	0.349452
Limitation of joint mobility	HP:0001376	1.50858	4293	83	240	7	4.64011	0.180097	0.349533
Short palpebral fissure	HP:0012745	1.50858	4293	83	240	7	4.64011	0.180097	0.349533
Hammertoe	HP:0001765	1.78875	4293	40	240	4	2.2362	0.182533	0.349901
Horizontal nystagmus	HP:0000666	1.78875	4293	40	240	4	2.2362	0.182533	0.349901
Chorioretinal coloboma	HP:0000567	1.78875	4293	40	240	4	2.2362	0.182533	0.349901
Cholestasis	HP:0001396	1.78875	4293	40	240	4	2.2362	0.182533	0.349901
Primary amenorrhea	HP:0000786	1.41217	4293	114	240	9	6.37317	0.18545	0.353785
Reduced visual acuity	HP:0007663	1.35698	4293	145	240	11	8.10622	0.185695	0.353785
Short distal phalanx of finger	HP:0009882	1.49063	4293	84	240	7	4.69602	0.187793	0.356693
Double outlet right ventricle	HP:0001719	1.9875	4293	27	240	3	1.50943	0.189389	0.357543
High forehead	HP:0000348	1.28379	4293	209	240	15	11.6841	0.189254	0.357543
Dolichocephaly	HP:0000268	1.34769	4293	146	240	11	8.16212	0.191545	0.360185
Epicanthus	HP:0000286	1.18956	4293	406	240	27	22.6974	0.191945	0.360185
Sparse axillary hair	HP:0002215	1.74512	4293	41	240	4	2.2921	0.194037	0.360851
Avascular necrosis	HP:0010885	1.74512	4293	41	240	4	2.2921	0.194037	0.360851
Abdominal pain	HP:0002027	1.26637	4293	226	240	16	12.6345	0.193717	0.360851
Long nose	HP:0003189	1.91652	4293	28	240	3	1.56534	0.203967	0.365148
Short clavicles	HP:0000894	1.91652	4293	28	240	3	1.56534	0.203967	0.365148
Aplasia/Hypoplasia of the cerebellar vermis	HP:0006817	1.91652	4293	28	240	3	1.56534	0.203967	0.365148
Hypoplastic fingernail	HP:0001804	1.91652	4293	28	240	3	1.56534	0.203967	0.365148
Prostate cancer	HP:0012125	1.91652	4293	28	240	3	1.56534	0.203967	0.365148
Occipital encephalocele	HP:0002085	1.91652	4293	28	240	3	1.56534	0.203967	0.365148
Decreased waist to hip ratio	HP:0031820	1.91652	4293	28	240	3	1.56534	0.203967	0.365148
Epiphyseal stippling	HP:0010655	1.91652	4293	28	240	3	1.56534	0.203967	0.365148
Short ribs	HP:0000773	1.5971	4293	56	240	5	3.13068	0.201582	0.365148
Progressive visual loss	HP:0000529	1.51162	4293	71	240	6	3.96925	0.203945	0.365148
Wide intermamillary distance	HP:0006610	1.45596	4293	86	240	7	4.80783	0.203582	0.365148
Short palm	HP:0004279	1.41683	4293	101	240	8	5.6464	0.201658	0.365148
Dandy-Walker malformation	HP:0001305	1.38782	4293	116	240	9	6.48498	0.198795	0.365148
Abnormality of the clavicle	HP:0000889	1.70357	4293	42	240	4	2.34801	0.205761	0.365211
Oligodontia	HP:0000677	1.70357	4293	42	240	4	2.34801	0.205761	0.365211
Large basal ganglia	HP:0007048	1.70357	4293	42	240	4	2.34801	0.205761	0.365211
Dysphasia	HP:0002357	1.56908	4293	57	240	5	3.18658	0.211682	0.372537
Hepatocellular carcinoma	HP:0001402	1.56908	4293	57	240	5	3.18658	0.211682	0.372537
Round face	HP:0000311	1.43922	4293	87	240	7	4.86373	0.211663	0.372537
Poor appetite	HP:0004396	1.85043	4293	29	240	3	1.62124	0.218795	0.37345
Cerebellar vermis atrophy	HP:0006855	1.85043	4293	29	240	3	1.62124	0.218795	0.37345
Clubbing	HP:0001217	1.85043	4293	29	240	3	1.62124	0.218795	0.37345
Macule	HP:0012733	1.85043	4293	29	240	3	1.62124	0.218795	0.37345
Arterial thrombosis	HP:0004420	1.85043	4293	29	240	3	1.62124	0.218795	0.37345
Hypoplasia of the pons	HP:0012110	1.85043	4293	29	240	3	1.62124	0.218795	0.37345
Aplasia/Hypoplasia of the skin	HP:0008065	1.85043	4293	29	240	3	1.62124	0.218795	0.37345
Patellar dislocation	HP:0002999	1.66395	4293	43	240	4	2.40391	0.217686	0.37345
Low-set, posteriorly rotated ears	HP:0000368	1.2538	4293	214	240	15	11.9637	0.214409	0.37345
Cerebral cortical atrophy	HP:0002120	1.23112	4293	247	240	17	13.8085	0.216603	0.37345
Glaucoma	HP:0000501	1.22424	4293	263	240	18	14.703	0.214843	0.37345
Breast carcinoma	HP:0003002	1.54203	4293	58	240	5	3.24249	0.221943	0.376828
Coarctation of aorta	HP:0001680	1.47021	4293	73	240	6	4.08106	0.221983	0.376828
Smooth philtrum	HP:0000319	1.37596	4293	104	240	8	5.81412	0.224139	0.379453
Hypoplastic left heart	HP:0004383	1.78875	4293	30	240	3	1.67715	0.233835	0.380364
Anal stenosis	HP:0002025	1.78875	4293	30	240	3	1.67715	0.233835	0.380364
Cellular immunodeficiency	HP:0005374	1.78875	4293	30	240	3	1.67715	0.233835	0.380364
Sensory impairment	HP:0003474	1.78875	4293	30	240	3	1.67715	0.233835	0.380364
Down-sloping shoulders	HP:0200021	1.78875	4293	30	240	3	1.67715	0.233835	0.380364
Hyperbilirubinemia	HP:0002904	1.78875	4293	30	240	3	1.67715	0.233835	0.380364
Abnormality of the cardiovascular system	HP:0001626	1.78875	4293	30	240	3	1.67715	0.233835	0.380364
Clubbing of toes	HP:0100760	1.78875	4293	30	240	3	1.67715	0.233835	0.380364
Congenital sensorineural hearing impairment	HP:0008527	1.62614	4293	44	240	4	2.45982	0.229793	0.380364
Delayed cranial suture closure	HP:0000270	1.62614	4293	44	240	4	2.45982	0.229793	0.380364
Pulmonary infiltrates	HP:0002113	1.62614	4293	44	240	4	2.45982	0.229793	0.380364
Pulmonary fibrosis	HP:0002206	1.51589	4293	59	240	5	3.29839	0.232351	0.380364
Papule	HP:0200034	1.45034	4293	74	240	6	4.13697	0.231197	0.380364
Severe global developmental delay	HP:0011344	1.36286	4293	105	240	8	5.87002	0.231833	0.380364
Abnormality of metabolism/homeostasis	HP:0001939	1.27768	4293	168	240	12	9.39203	0.228085	0.380364
Hypertelorism	HP:0000316	1.12749	4293	587	240	37	32.8162	0.234972	0.381218
Azoospermia	HP:0000027	1.39125	4293	90	240	7	5.03145	0.236592	0.381857
Gynecomastia	HP:0000771	1.39125	4293	90	240	7	5.03145	0.236592	0.381857
Sleep apnea	HP:0010535	1.59	4293	45	240	4	2.51572	0.242064	0.384074
Abnormal cardiac septum morphology	HP:0001671	1.49063	4293	60	240	5	3.3543	0.242897	0.384074
Obsessive-compulsive behavior	HP:0000722	1.49063	4293	60	240	5	3.3543	0.242897	0.384074
Anophthalmia	HP:0000528	1.49063	4293	60	240	5	3.3543	0.242897	0.384074
Biparietal narrowing	HP:0004422	1.49063	4293	60	240	5	3.3543	0.242897	0.384074
Microdontia	HP:0000691	1.35	4293	106	240	8	5.92593	0.239619	0.384074
Anal atresia	HP:0002023	1.31957	4293	122	240	9	6.82041	0.241098	0.384074
Hypertension	HP:0000822	1.2014	4293	268	240	18	14.9825	0.238834	0.384074
Hypoplastic nipples	HP:0002557	1.73105	4293	31	240	3	1.73305	0.249054	0.387902
Trigonocephaly	HP:0000243	1.73105	4293	31	240	3	1.73305	0.249054	0.387902
Hernia	HP:0100790	1.73105	4293	31	240	3	1.73305	0.249054	0.387902
Optic disc hypoplasia	HP:0007766	1.73105	4293	31	240	3	1.73305	0.249054	0.387902
Protruding ear	HP:0000411	1.26944	4293	155	240	11	8.66527	0.247705	0.387902
Gastroesophageal reflux	HP:0002020	1.1925	4293	270	240	18	15.0943	0.248739	0.387902
Underdeveloped nasal alae	HP:0000430	1.41217	4293	76	240	6	4.24878	0.249977	0.388368
Small nail	HP:0001792	1.46619	4293	61	240	5	3.4102	0.253569	0.391995
Sandal gap	HP:0001852	1.46619	4293	61	240	5	3.4102	0.253569	0.391995
Multifocal epileptiform discharges	HP:0010841	1.55543	4293	46	240	4	2.57163	0.254482	0.392431
Neurological speech impairment	HP:0002167	1.29829	4293	124	240	9	6.93222	0.255869	0.393595
Motor delay	HP:0001270	1.14958	4293	389	240	25	21.747	0.256635	0.393802
Single transverse palmar crease	HP:0000954	1.39383	4293	77	240	6	4.30468	0.259526	0.39726
Proximal placement of thumb	HP:0009623	1.67695	4293	32	240	3	1.78896	0.264419	0.401787
Hyperlipidemia	HP:0003077	1.67695	4293	32	240	3	1.78896	0.264419	0.401787
Late onset	HP:0003584	1.67695	4293	32	240	3	1.78896	0.264419	0.401787
Hypercalcemia	HP:0003072	1.52234	4293	47	240	4	2.62753	0.267027	0.403781
Infantile spasms	HP:0012469	1.52234	4293	47	240	4	2.62753	0.267027	0.403781
Cleft upper lip	HP:0000204	1.30091	4293	110	240	8	6.14955	0.271607	0.409712
Coloboma	HP:0000589	1.41964	4293	63	240	5	3.52201	0.275246	0.411219
Deeply set eye	HP:0000490	1.2375	4293	159	240	11	8.88889	0.274427	0.411219
Myopia	HP:0000545	1.17082	4293	275	240	18	15.3739	0.274206	0.411219
Nystagmus	HP:0000639	1.08673	4293	823	240	50	46.0098	0.274594	0.411219
Joint swelling	HP:0001386	1.62614	4293	33	240	3	1.84486	0.279895	0.413496
Decreased serum estradiol	HP:0008214	1.62614	4293	33	240	3	1.84486	0.279895	0.413496
Obstructive sleep apnea	HP:0002870	1.62614	4293	33	240	3	1.84486	0.279895	0.413496
Joint hypermobility	HP:0001382	1.31803	4293	95	240	7	5.31097	0.280089	0.413496
Malabsorption	HP:0002024	1.2196	4293	176	240	12	9.83927	0.278333	0.413496
Death in infancy	HP:0001522	1.24219	4293	144	240	10	8.05031	0.283925	0.418169
Widely spaced teeth	HP:0000687	1.39746	4293	64	240	5	3.57792	0.286229	0.419578
Reduced number of teeth	HP:0009804	1.39746	4293	64	240	5	3.57792	0.286229	0.419578
Subcutaneous nodule	HP:0001482	1.34156	4293	80	240	6	4.4724	0.288722	0.419731
Thin vermilion border	HP:0000233	1.3043	4293	96	240	7	5.36688	0.289029	0.419731
Pes planus	HP:0001763	1.16509	4293	261	240	17	14.5912	0.288933	0.419731
Autosomal dominant inheritance	HP:0000006	1.04793	4293	1724	240	101	96.3802	0.287427	0.419731
Postaxial polydactyly	HP:0100259	1.4602	4293	49	240	4	2.73934	0.292433	0.422704
Anterior hypopituitarism	HP:0000830	1.4602	4293	49	240	4	2.73934	0.292433	0.422704
Neonatal hypoglycemia	HP:0001998	1.57831	4293	34	240	3	1.90077	0.295454	0.423144
Neoplasm of the stomach	HP:0006753	1.57831	4293	34	240	3	1.90077	0.295454	0.423144
Abnormal nasal morphology	HP:0005105	1.57831	4293	34	240	3	1.90077	0.295454	0.423144
Megalocornea	HP:0000485	1.57831	4293	34	240	3	1.90077	0.295454	0.423144
Toe syndactyly	HP:0001770	1.26637	4293	113	240	8	6.31726	0.296356	0.423463
Hip dislocation	HP:0002827	1.22517	4293	146	240	10	8.16212	0.298529	0.425592
Cerebellar atrophy	HP:0001272	1.14991	4293	280	240	18	15.6534	0.300577	0.427219
Delayed skeletal maturation	HP:0002750	1.14432	4293	297	240	19	16.6038	0.301042	0.427219
Polymicrogyria	HP:0002126	1.20713	4293	163	240	11	9.11251	0.302015	0.427626
Genu valgum	HP:0002857	1.25526	4293	114	240	8	6.37317	0.304727	0.430487
Pulmonary artery stenosis	HP:0004415	1.53321	4293	35	240	3	1.95667	0.311065	0.433543
Furrowed tongue	HP:0000221	1.53321	4293	35	240	3	1.95667	0.311065	0.433543
Intestinal polyposis	HP:0200008	1.53321	4293	35	240	3	1.95667	0.311065	0.433543
Cubitus valgus	HP:0002967	1.53321	4293	35	240	3	1.95667	0.311065	0.433543
Dermal atrophy	HP:0004334	1.53321	4293	35	240	3	1.95667	0.311065	0.433543
Microphthalmia	HP:0000568	1.17021	4293	214	240	14	11.9637	0.308355	0.433543
Microretrognathia	HP:0000308	1.40294	4293	51	240	4	2.85115	0.318144	0.441047
Nasogastric tube feeding	HP:0040288	1.40294	4293	51	240	4	2.85115	0.318144	0.441047
Abnormality of the pinna	HP:0000377	1.29307	4293	83	240	6	4.64011	0.318574	0.441047
Prominent nose	HP:0000448	1.33489	4293	67	240	5	3.74563	0.31962	0.441515
Abnormality of retinal pigmentation	HP:0007703	1.15938	4293	216	240	14	12.0755	0.320751	0.442096
Personality changes	HP:0000751	1.49063	4293	36	240	3	2.01258	0.326701	0.447329
Neoplasm of the skin	HP:0008069	1.49063	4293	36	240	3	2.01258	0.326701	0.447329
Cerebral visual impairment	HP:0100704	1.21043	4293	133	240	9	7.43536	0.325493	0.447329
Bone marrow hypocellularity	HP:0005528	1.37596	4293	52	240	4	2.90706	0.331073	0.447415
Prominent occiput	HP:0000269	1.37596	4293	52	240	4	2.90706	0.331073	0.447415
Hydrops fetalis	HP:0001789	1.37596	4293	52	240	4	2.90706	0.331073	0.447415
Preaxial hand polydactyly	HP:0001177	1.37596	4293	52	240	4	2.90706	0.331073	0.447415
Short metacarpal	HP:0010049	1.31526	4293	68	240	5	3.80154	0.330862	0.447415
Retinal degeneration	HP:0000546	1.27768	4293	84	240	6	4.69602	0.328634	0.447415
Proptosis	HP:0000520	1.1569	4293	201	240	13	11.2369	0.332677	0.44861
Neuronal loss in central nervous system	HP:0002529	1.45034	4293	37	240	3	2.06848	0.342335	0.457671
Urticaria	HP:0001025	1.45034	4293	37	240	3	2.06848	0.342335	0.457671
Osteomyelitis	HP:0002754	1.45034	4293	37	240	3	2.06848	0.342335	0.457671
Clinodactyly	HP:0030084	1.1925	4293	135	240	9	7.54717	0.341491	0.457671
Narrow mouth	HP:0000160	1.16428	4293	169	240	11	9.44794	0.344657	0.459789
Hypospadias	HP:0000047	1.12677	4293	254	240	16	14.1999	0.345422	0.459824
Dysmetria	HP:0001310	1.20252	4293	119	240	8	6.65269	0.347274	0.461304
Abnormality of the hip bone	HP:0003272	1.41217	4293	38	240	3	2.12439	0.357942	0.462147
Telangiectasia	HP:0001009	1.41217	4293	38	240	3	2.12439	0.357942	0.462147
Freckling	HP:0001480	1.41217	4293	38	240	3	2.12439	0.357942	0.462147
Short finger	HP:0009381	1.41217	4293	38	240	3	2.12439	0.357942	0.462147
Acanthosis nigricans	HP:0000956	1.41217	4293	38	240	3	2.12439	0.357942	0.462147
Increased susceptibility to fractures	HP:0002659	1.41217	4293	38	240	3	2.12439	0.357942	0.462147
Joint contracture of the hand	HP:0009473	1.325	4293	54	240	4	3.01887	0.357	0.462147
Horseshoe kidney	HP:0000085	1.325	4293	54	240	4	3.01887	0.357	0.462147
Myocardial infarction	HP:0001658	1.27768	4293	70	240	5	3.91335	0.35345	0.462147
Spina bifida occulta	HP:0003298	1.27768	4293	70	240	5	3.91335	0.35345	0.462147
Abnormality of the hypothalamus-pituitary axis	HP:0000864	1.27768	4293	70	240	5	3.91335	0.35345	0.462147
Behavioral abnormality	HP:0000708	1.24797	4293	86	240	6	4.80783	0.348872	0.462147
Open mouth	HP:0000194	1.23362	4293	87	240	6	4.86373	0.359036	0.462147
Failure to thrive in infancy	HP:0001531	1.23362	4293	87	240	6	4.86373	0.359036	0.462147
Pachygyria	HP:0001302	1.1925	4293	120	240	8	6.7086	0.35589	0.462147
Abnormality of the metacarpal bones	HP:0001163	1.37596	4293	39	240	3	2.18029	0.373498	0.473909
Attenuation of retinal blood vessels	HP:0007843	1.37596	4293	39	240	3	2.18029	0.373498	0.473909
Recurrent aphthous stomatitis	HP:0011107	1.37596	4293	39	240	3	2.18029	0.373498	0.473909
Brain atrophy	HP:0012444	1.30091	4293	55	240	4	3.07477	0.369969	0.473909
Preauricular skin tag	HP:0000384	1.30091	4293	55	240	4	3.07477	0.369969	0.473909
Keratoconus	HP:0000563	1.1925	4293	105	240	7	5.87002	0.371786	0.473909
Delayed myelination	HP:0012448	1.17295	4293	122	240	8	6.82041	0.373193	0.473909
Renal cyst	HP:0000107	1.2059	4293	89	240	6	4.97554	0.379415	0.478493
Cerebellar vermis hypoplasia	HP:0001320	1.2059	4293	89	240	6	4.97554	0.379415	0.478493
Abnormal form of the vertebral bodies	HP:0003312	1.2059	4293	89	240	6	4.97554	0.379415	0.478493
Constriction of peripheral visual field	HP:0001133	1.27768	4293	56	240	4	3.13068	0.382922	0.48
Scrotal hypoplasia	HP:0000046	1.27768	4293	56	240	4	3.13068	0.382922	0.48
Osteolysis	HP:0002797	1.27768	4293	56	240	4	3.13068	0.382922	0.48
Overfolded helix	HP:0000396	1.34156	4293	40	240	3	2.2362	0.388982	0.48128
Thickened skin	HP:0001072	1.34156	4293	40	240	3	2.2362	0.388982	0.48128
Resting tremor	HP:0002322	1.34156	4293	40	240	3	2.2362	0.388982	0.48128
Atonic seizures	HP:0010819	1.34156	4293	40	240	3	2.2362	0.388982	0.48128
Increased bone mineral density	HP:0011001	1.34156	4293	40	240	3	2.2362	0.388982	0.48128
Bowel incontinence	HP:0002607	1.34156	4293	40	240	3	2.2362	0.388982	0.48128
Hypotelorism	HP:0000601	1.1925	4293	90	240	6	5.03145	0.389617	0.48128
Rigidity	HP:0002063	1.14176	4293	141	240	9	7.8826	0.390122	0.48128
Melanoma	HP:0002861	1.25526	4293	57	240	4	3.18658	0.395845	0.486413
Seizures	HP:0001250	1.03045	4293	1354	240	78	75.6953	0.395415	0.486413
Limb muscle weakness	HP:0003690	1.30884	4293	41	240	3	2.2921	0.404372	0.487543
Anosmia	HP:0000458	1.30884	4293	41	240	3	2.2921	0.404372	0.487543
Abnormal cortical bone morphology	HP:0003103	1.30884	4293	41	240	3	2.2921	0.404372	0.487543
Male pseudohermaphroditism	HP:0000037	1.30884	4293	41	240	3	2.2921	0.404372	0.487543
Abnormality of the nail	HP:0001597	1.23362	4293	58	240	4	3.24249	0.408727	0.487543
Lymphedema	HP:0001004	1.23362	4293	58	240	4	3.24249	0.408727	0.487543
Exotropia	HP:0000577	1.23362	4293	58	240	4	3.24249	0.408727	0.487543
Sparse body hair	HP:0002231	1.23362	4293	58	240	4	3.24249	0.408727	0.487543
Fasciculations	HP:0002380	1.23362	4293	58	240	4	3.24249	0.408727	0.487543
Hepatic fibrosis	HP:0001395	1.1925	4293	75	240	5	4.19287	0.410069	0.487543
Short attention span	HP:0000736	1.1925	4293	75	240	5	4.19287	0.410069	0.487543
Encephalocele	HP:0002084	1.1925	4293	75	240	5	4.19287	0.410069	0.487543
Renal hypoplasia	HP:0000089	1.1794	4293	91	240	6	5.08735	0.399817	0.487543
Thick vermilion border	HP:0012471	1.16658	4293	92	240	6	5.14326	0.41001	0.487543
Bradykinesia	HP:0002067	1.16658	4293	92	240	6	5.14326	0.41001	0.487543
Precocious puberty	HP:0000826	1.16658	4293	92	240	6	5.14326	0.41001	0.487543
Clinodactyly of the 5th finger	HP:0004209	1.08409	4293	264	240	16	14.7589	0.405444	0.487543
Decreased motor nerve conduction velocity	HP:0003431	1.27768	4293	42	240	3	2.34801	0.41965	0.492062
Arteriovenous malformation	HP:0100026	1.27768	4293	42	240	3	2.34801	0.41965	0.492062
Growth abnormality	HP:0001507	1.27768	4293	42	240	3	2.34801	0.41965	0.492062
Adrenal insufficiency	HP:0000846	1.27768	4293	42	240	3	2.34801	0.41965	0.492062
Generalized hyperpigmentation	HP:0007440	1.27768	4293	42	240	3	2.34801	0.41965	0.492062
Recurrent otitis media	HP:0000403	1.15403	4293	93	240	6	5.19916	0.420187	0.492062
Flexion contracture	HP:0001371	1.08662	4293	214	240	13	11.9637	0.419422	0.492062
Intrauterine growth retardation	HP:0001511	1.05459	4293	441	240	26	24.6541	0.416872	0.492062
Hypotrichosis	HP:0001006	1.21271	4293	59	240	4	3.29839	0.421554	0.492736
Generalized hirsutism	HP:0002230	1.12804	4293	111	240	7	6.20545	0.427893	0.499209
Thin skin	HP:0000963	1.16153	4293	77	240	5	4.30468	0.43258	0.502266
Mitral valve prolapse	HP:0001634	1.16153	4293	77	240	5	4.30468	0.43258	0.502266
Kyphosis	HP:0002808	1.06897	4293	251	240	15	14.0321	0.432932	0.502266
Abnormality of movement	HP:0100022	1.24797	4293	43	240	3	2.40391	0.434797	0.503492
Sloping forehead	HP:0000340	1.09515	4293	147	240	9	8.21803	0.439101	0.507253
Agenesis of corpus callosum	HP:0001274	1.0716	4293	217	240	13	12.1314	0.439673	0.507253
Rod-cone dystrophy	HP:0000510	1.08409	4293	165	240	10	9.22432	0.44338	0.510584
Macular degeneration	HP:0000608	1.2196	4293	44	240	3	2.45982	0.449797	0.512202
Cupped ear	HP:0000378	1.2196	4293	44	240	3	2.45982	0.449797	0.512202
Hemivertebrae	HP:0002937	1.2196	4293	44	240	3	2.45982	0.449797	0.512202
Nephroblastoma	HP:0002667	1.2196	4293	44	240	3	2.45982	0.449797	0.512202
Unilateral renal agenesis	HP:0000122	1.2196	4293	44	240	3	2.45982	0.449797	0.512202
Cafe-au-lait spot	HP:0000957	1.17295	4293	61	240	4	3.4102	0.446999	0.512202
Arachnodactyly	HP:0001166	1.11797	4293	96	240	6	5.36688	0.45057	0.512202
Decreased testicular size	HP:0008734	1.09237	4293	131	240	8	7.32355	0.451362	0.512202
Sudden cardiac death	HP:0001645	1.10644	4293	97	240	6	5.42278	0.460628	0.521765
Postaxial foot polydactyly	HP:0001830	1.1925	4293	45	240	3	2.51572	0.464636	0.52535
Abnormality of neuronal migration	HP:0002269	1.11797	4293	80	240	5	4.4724	0.465991	0.525928
Prominent forehead	HP:0011220	1.06614	4293	151	240	9	8.44165	0.471576	0.531269
Visual loss	HP:0000572	1.07942	4293	116	240	7	6.48498	0.474251	0.533318
Triphalangeal thumb	HP:0001199	1.16658	4293	46	240	3	2.57163	0.479297	0.53467
Choreoathetosis	HP:0001266	1.10417	4293	81	240	5	4.5283	0.477003	0.53467
Gingival overgrowth	HP:0000212	1.08409	4293	99	240	6	5.53459	0.480602	0.53467
Astigmatism	HP:0000483	1.08409	4293	99	240	6	5.53459	0.480602	0.53467
Muscular hypotonia of the trunk	HP:0008936	1.06791	4293	134	240	8	7.49126	0.477183	0.53467
Cerebral atrophy	HP:0002059	1.03431	4293	294	240	17	16.4361	0.479803	0.53467
Hoarse voice	HP:0001609	1.11797	4293	64	240	4	3.57792	0.484485	0.535167
Hemolytic anemia	HP:0001878	1.11797	4293	64	240	4	3.57792	0.484485	0.535167
Hyperinsulinemia	HP:0000842	1.07019	4293	117	240	7	6.54088	0.483422	0.535167
Short stature	HP:0004322	1.01185	4293	1043	240	59	58.3089	0.483488	0.535167
Myalgia	HP:0003326	1.06	4293	135	240	8	7.54717	0.485731	0.535593
Atypical scarring of skin	HP:0000987	1.07325	4293	100	240	6	5.5905	0.490509	0.538954
Renal agenesis	HP:0000104	1.07325	4293	100	240	6	5.5905	0.490509	0.538954
Calf muscle hypertrophy	HP:0008981	1.14176	4293	47	240	3	2.62753	0.49377	0.53939
Chronic diarrhea	HP:0002028	1.14176	4293	47	240	3	2.62753	0.49377	0.53939
Febrile seizures	HP:0002373	1.10077	4293	65	240	4	3.63382	0.49676	0.53939
Elbow flexion contracture	HP:0002987	1.10077	4293	65	240	4	3.63382	0.49676	0.53939
Abnormal autonomic nervous system physiology	HP:0012332	1.10077	4293	65	240	4	3.63382	0.49676	0.53939
Lymphadenopathy	HP:0002716	1.04537	4293	154	240	9	8.60936	0.495693	0.53939
Type II diabetes mellitus	HP:0005978	1.03997	4293	172	240	10	9.61565	0.496966	0.53939
Absent septum pellucidum	HP:0001331	1.07756	4293	83	240	5	4.64011	0.498797	0.540436
Myoclonus	HP:0001336	1.02893	4293	226	240	13	12.6345	0.500076	0.54088
Intellectual disability, progressive	HP:0006887	1.11797	4293	48	240	3	2.68344	0.508043	0.547346
Visual field defect	HP:0001123	1.11797	4293	48	240	3	2.68344	0.508043	0.547346
Nephrocalcinosis	HP:0000121	1.08409	4293	66	240	4	3.68973	0.50891	0.547346
Ambiguous genitalia	HP:0000062	1.06473	4293	84	240	5	4.69602	0.509567	0.547346
Feeding difficulties	HP:0011968	1.00945	4293	443	240	25	24.7659	0.512881	0.549956
Gangrene	HP:0100758	1.09515	4293	49	240	3	2.73934	0.522104	0.554124
Gingival bleeding	HP:0000225	1.09515	4293	49	240	3	2.73934	0.522104	0.554124
Abnormality of the liver	HP:0001392	1.06791	4293	67	240	4	3.74563	0.520929	0.554124
Hepatic steatosis	HP:0001397	1.05221	4293	85	240	5	4.75192	0.520244	0.554124
Aplasia/Hypoplasia of the corpus callosum	HP:0007370	1.04199	4293	103	240	6	5.75821	0.519847	0.554124
Abnormal electroretinogram	HP:0000512	1.0254	4293	157	240	9	8.77708	0.519518	0.554124
Cone-shaped epiphysis	HP:0010579	1.07325	4293	50	240	3	2.79525	0.535946	0.554857
Abnormal myelination	HP:0012447	1.07325	4293	50	240	3	2.79525	0.535946	0.554857
Opacification of the corneal stroma	HP:0007759	1.07325	4293	50	240	3	2.79525	0.535946	0.554857
Aortic valve stenosis	HP:0001650	1.07325	4293	50	240	3	2.79525	0.535946	0.554857
Leukocytosis	HP:0001974	1.07325	4293	50	240	3	2.79525	0.535946	0.554857
Pleural effusion	HP:0002202	1.07325	4293	50	240	3	2.79525	0.535946	0.554857
Decreased fertility	HP:0000144	1.07325	4293	50	240	3	2.79525	0.535946	0.554857
Sacral dimple	HP:0000960	1.05221	4293	68	240	4	3.80154	0.532808	0.554857
Bone pain	HP:0002653	1.05221	4293	68	240	4	3.80154	0.532808	0.554857
Progressive night blindness	HP:0007675	1.03997	4293	86	240	5	4.80783	0.530823	0.554857
Hypopigmented skin patches	HP:0001053	1.02633	4293	122	240	7	6.82041	0.528543	0.554857
Cardiomyopathy	HP:0001638	1.01489	4293	141	240	8	7.8826	0.536154	0.554857
Delayed puberty	HP:0000823	1.01424	4293	194	240	11	10.8456	0.52678	0.554857
Joint stiffness	HP:0001387	1.0125	4293	159	240	9	8.88889	0.535201	0.554857
Photophobia	HP:0000613	1.0125	4293	212	240	12	11.8519	0.526609	0.554857
Myelodysplasia	HP:0002863	1.03696	4293	69	240	4	3.85744	0.544541	0.560742
Neonatal hypotonia	HP:0001319	1.00775	4293	142	240	8	7.9385	0.544385	0.560742
Wide mouth	HP:0000154	1.00775	4293	142	240	8	7.9385	0.544385	0.560742
Pulmonary embolism	HP:0002204	1.05221	4293	51	240	3	2.85115	0.549558	0.563116
Renal cell carcinoma	HP:0005584	1.05221	4293	51	240	3	2.85115	0.549558	0.563116
Optic disc pallor	HP:0000543	1.0125	4293	106	240	6	5.92593	0.548515	0.563116
Parkinsonism	HP:0001300	1.01634	4293	88	240	5	4.91964	0.551664	0.563421
Vertigo	HP:0002321	1.01634	4293	88	240	5	4.91964	0.551664	0.563421
Hypogonadotrophic hypogonadism	HP:0000044	1.0017	4293	125	240	7	6.98812	0.554894	0.565792
Lymphopenia	HP:0001888	1.02214	4293	70	240	4	3.91335	0.556122	0.566118
Short thumb	HP:0009778	1.03197	4293	52	240	3	2.90706	0.562935	0.568409
High myopia	HP:0011003	1.03197	4293	52	240	3	2.90706	0.562935	0.568409
Portal hypertension	HP:0001409	1.03197	4293	52	240	3	2.90706	0.562935	0.568409
Aplasia/Hypoplasia of the iris	HP:0008053	1.03197	4293	52	240	3	2.90706	0.562935	0.568409
Syndactyly	HP:0001159	1.00492	4293	89	240	5	4.97554	0.561917	0.568409
Congenital hip dislocation	HP:0001374	1.00775	4293	71	240	4	3.96925	0.567546	0.571213
Cortical dysplasia	HP:0002539	1.00775	4293	71	240	4	3.96925	0.567546	0.571213
Irregular hyperpigmentation	HP:0007400	1.0125	4293	53	240	3	2.96296	0.576069	0.576069
Abnormality of the foot	HP:0001760	1.0125	4293	53	240	3	2.96296	0.576069	0.576069
Spastic gait	HP:0002064	1.0125	4293	53	240	3	2.96296	0.576069	0.576069
Intestinal obstruction	HP:0005214	1.0125	4293	53	240	3	2.96296	0.576069	0.576069
Osteopenia	HP:0000938	0.998372	4293	215	240	12	12.0196	0.546923	1
Osteoporosis	HP:0000939	0.998015	4293	233	240	13	13.0259	0.546057	1
Hypertriglyceridemia	HP:0002155	0.99375	4293	72	240	4	4.02516	0.578807	1
Aphasia	HP:0002381	0.99375	4293	54	240	3	3.01887	0.588956	1
Triangular face	HP:0000325	0.99375	4293	108	240	6	6.03774	0.5672	1
Tented upper lip vermilion	HP:0010804	0.99375	4293	72	240	4	4.02516	0.578807	1
Adducted thumb	HP:0001181	0.99375	4293	72	240	4	4.02516	0.578807	1
Radial deviation of finger	HP:0009466	0.99375	4293	54	240	3	3.01887	0.588956	1
Esotropia	HP:0000565	0.99375	4293	108	240	6	6.03774	0.5672	1
Tracheoesophageal fistula	HP:0002575	0.99375	4293	72	240	4	4.02516	0.578807	1
Hyperkeratosis	HP:0000962	0.98283	4293	91	240	5	5.08735	0.582066	1
Adult onset	HP:0003581	0.978223	4293	128	240	7	7.15584	0.580595	1
Infantile onset	HP:0003593	0.977904	4293	439	240	24	24.5423	0.580697	1
Rhizomelia	HP:0008905	0.975682	4293	55	240	3	3.07477	0.60159	1
Submucous cleft hard palate	HP:0000176	0.975682	4293	55	240	3	3.07477	0.60159	1
Hypoplasia of the brainstem	HP:0002365	0.975682	4293	55	240	3	3.07477	0.60159	1
Bruising susceptibility	HP:0000978	0.97064	4293	129	240	7	7.21174	0.589004	1
Diarrhea	HP:0002014	0.969273	4293	203	240	11	11.3487	0.58923	1
Sporadic	HP:0003745	0.966892	4293	111	240	6	6.20545	0.594518	1
Abnormal blistering of the skin	HP:0008066	0.966892	4293	74	240	4	4.13697	0.600822	1
Feeding difficulties in infancy	HP:0008872	0.963636	4293	297	240	16	16.6038	0.601666	1
Anxiety	HP:0000739	0.963173	4293	260	240	14	14.5353	0.600369	1
Insulin resistance	HP:0000855	0.958259	4293	56	240	3	3.13068	0.613967	1
Talipes	HP:0001883	0.954	4293	75	240	4	4.19287	0.611569	1
Intestinal malrotation	HP:0002566	0.954	4293	75	240	4	4.19287	0.611569	1
Large fontanelles	HP:0000239	0.954	4293	75	240	4	4.19287	0.611569	1
Depressivity	HP:0000716	0.950831	4293	301	240	16	16.8274	0.623797	1
Macroglossia	HP:0000158	0.949779	4293	113	240	6	6.31726	0.61222	1
Dysphagia	HP:0002015	0.947682	4293	302	240	16	16.8833	0.629241	1
Heterogeneous	HP:0001425	0.941447	4293	285	240	15	15.9329	0.637703	1
Short toe	HP:0001831	0.941447	4293	57	240	3	3.18658	0.626085	1
Platyspondyly	HP:0000926	0.941447	4293	95	240	5	5.31097	0.620834	1
Aortic aneurysm	HP:0004942	0.941447	4293	57	240	3	3.18658	0.626085	1
Iris coloboma	HP:0000612	0.941447	4293	152	240	8	8.49755	0.623153	1
Polyneuropathy	HP:0001271	0.941447	4293	57	240	3	3.18658	0.626085	1
Split hand	HP:0001171	0.941447	4293	57	240	3	3.18658	0.626085	1
Ptosis	HP:0000508	0.936518	4293	573	240	30	32.0335	0.683874	1
Downturned corners of mouth	HP:0002714	0.933261	4293	115	240	6	6.42907	0.62949	1
Generalized hypotonia	HP:0001290	0.932248	4293	921	240	48	51.4885	0.738043	1
Abnormal fingernail morphology	HP:0001231	0.931641	4293	96	240	5	5.36688	0.630189	1
Umbilical hernia	HP:0001537	0.929221	4293	231	240	12	12.914	0.64919	1
Hyperreflexia	HP:0001347	0.925786	4293	541	240	28	30.2446	0.703187	1
High, narrow palate	HP:0002705	0.925216	4293	116	240	6	6.48498	0.637958	1
Muscle stiffness	HP:0003552	0.925216	4293	58	240	3	3.24249	0.637941	1
Hypoalbuminemia	HP:0003073	0.925216	4293	58	240	3	3.24249	0.637941	1
Hemangioma	HP:0001028	0.925216	4293	58	240	3	3.24249	0.637941	1
Abnormality of the metaphysis	HP:0000944	0.922036	4293	97	240	5	5.42278	0.639404	1
Tremor	HP:0001337	0.917308	4293	351	240	18	19.6226	0.688638	1
Impulsivity	HP:0100710	0.917308	4293	117	240	6	6.54088	0.646311	1
Leukopenia	HP:0001882	0.917308	4293	78	240	4	4.36059	0.642726	1
Abnormality of extrapyramidal motor function	HP:0002071	0.917308	4293	78	240	4	4.36059	0.642726	1
Blue sclerae	HP:0000592	0.917308	4293	78	240	4	4.36059	0.642726	1
Vesicoureteral reflux	HP:0000076	0.91396	4293	137	240	7	7.65898	0.653096	1
Scoliosis	HP:0002650	0.912628	4293	784	240	40	43.8295	0.769482	1
Bowing of the long bones	HP:0006487	0.909534	4293	59	240	3	3.29839	0.649533	1
Decreased liver function	HP:0001410	0.909534	4293	59	240	3	3.29839	0.649533	1
Hypotension	HP:0002615	0.909534	4293	59	240	3	3.29839	0.649533	1
Hypogonadism	HP:0000135	0.90674	4293	217	240	11	12.1314	0.678373	1
Variable expressivity	HP:0003828	0.897179	4293	319	240	16	17.8337	0.715592	1
Broad-based gait	HP:0002136	0.894375	4293	60	240	3	3.3543	0.66086	1
Multiple cafe-au-lait spots	HP:0007565	0.894375	4293	60	240	3	3.3543	0.66086	1
Growth hormone deficiency	HP:0000824	0.894375	4293	80	240	4	4.4724	0.662572	1
Hyperpigmentation of the skin	HP:0000953	0.894375	4293	60	240	3	3.3543	0.66086	1
Visual impairment	HP:0000505	0.889145	4293	342	240	17	19.1195	0.7338	1
Hypodontia	HP:0000668	0.88882	4293	161	240	8	9.0007	0.687405	1
Abnormal testis morphology	HP:0000035	0.88552	4293	101	240	5	5.6464	0.674828	1
Sensorineural hearing impairment	HP:0000407	0.880615	4293	650	240	32	36.3382	0.814115	1
Hydroureter	HP:0000072	0.879713	4293	61	240	3	3.4102	0.671922	1
Conductive hearing impairment	HP:0000405	0.878684	4293	285	240	14	15.9329	0.735291	1
Palmoplantar keratoderma	HP:0000982	0.875612	4293	143	240	7	7.99441	0.697085	1
Pancytopenia	HP:0001876	0.872561	4293	82	240	4	4.58421	0.681662	1
Choanal atresia	HP:0000453	0.868325	4293	103	240	5	5.75821	0.691658	1
Camptodactyly of finger	HP:0100490	0.867273	4293	165	240	8	9.22432	0.713669	1
Slow progression	HP:0003677	0.867273	4293	165	240	8	9.22432	0.713669	1
Abnormal bleeding	HP:0001892	0.865524	4293	62	240	3	3.46611	0.682718	1
Incomplete penetrance	HP:0003829	0.863534	4293	145	240	7	8.10622	0.710919	1
Finger syndactyly	HP:0006101	0.862048	4293	166	240	8	9.28022	0.720005	1
Epistaxis	HP:0000421	0.862048	4293	83	240	4	4.64011	0.690921	1
Spastic paraplegia	HP:0001258	0.862048	4293	83	240	4	4.64011	0.690921	1
Ascites	HP:0001541	0.862048	4293	83	240	4	4.64011	0.690921	1
Skin rash	HP:0000988	0.862048	4293	83	240	4	4.64011	0.690921	1
Hypertonia	HP:0001276	0.860896	4293	187	240	9	10.4542	0.728716	1
Optic atrophy	HP:0000648	0.853411	4293	524	240	25	29.2942	0.834561	1
Chorea	HP:0002072	0.851786	4293	126	240	6	7.04403	0.716113	1
Lumbar hyperlordosis	HP:0002938	0.851786	4293	63	240	3	3.52201	0.693249	1
Distal amyotrophy	HP:0003693	0.84375	4293	106	240	5	5.92593	0.715779	1
Joint laxity	HP:0001388	0.840352	4293	149	240	7	8.32984	0.737314	1
Inguinal hernia	HP:0000023	0.839789	4293	213	240	10	11.9078	0.763521	1
Clubbing of fingers	HP:0100759	0.838477	4293	64	240	3	3.57792	0.703516	1
Radioulnar synostosis	HP:0002974	0.838477	4293	64	240	3	3.57792	0.703516	1
Glomerulopathy	HP:0100820	0.838477	4293	64	240	3	3.57792	0.703516	1
Schizophrenia	HP:0100753	0.838477	4293	64	240	3	3.57792	0.703516	1
Fever	HP:0001945	0.837287	4293	235	240	11	13.1377	0.774766	1
Cerebral calcification	HP:0002514	0.835864	4293	107	240	5	5.98183	0.723518	1
Narrow chest	HP:0000774	0.835864	4293	107	240	5	5.98183	0.723518	1
Developmental regression	HP:0002376	0.831977	4293	301	240	14	16.8274	0.804532	1
Severe short stature	HP:0003510	0.831977	4293	86	240	4	4.80783	0.71755	1
Webbed neck	HP:0000465	0.831977	4293	86	240	4	4.80783	0.71755	1
Hypoplasia of penis	HP:0008736	0.830222	4293	237	240	11	13.2495	0.784106	1
Sparse and thin eyebrow	HP:0000535	0.825577	4293	65	240	3	3.63382	0.713521	1
Knee flexion contracture	HP:0006380	0.825577	4293	65	240	3	3.63382	0.713521	1
Palpitations	HP:0001962	0.825577	4293	65	240	3	3.63382	0.713521	1
Progressive cerebellar ataxia	HP:0002073	0.822414	4293	87	240	4	4.86373	0.726044	1
Hepatomegaly	HP:0002240	0.821555	4293	479	240	22	26.7785	0.868891	1
Memory impairment	HP:0002354	0.820528	4293	109	240	5	6.09364	0.738543	1
Autosomal recessive inheritance	HP:0000007	0.820077	4293	2552	240	117	142.669	0.999776	1
Pectus excavatum	HP:0000767	0.819275	4293	262	240	12	14.6471	0.806612	1
Blindness	HP:0000618	0.816442	4293	241	240	11	13.4731	0.80196	1
Spasticity	HP:0001257	0.816295	4293	504	240	23	28.1761	0.881395	1
Anemia	HP:0001903	0.815717	4293	307	240	14	17.1628	0.826867	1
Failure to thrive	HP:0001508	0.814157	4293	747	240	34	41.761	0.929045	1
Hemiplegia/hemiparesis	HP:0004374	0.813068	4293	110	240	5	6.14955	0.745831	1
Hyperlordosis	HP:0003307	0.813068	4293	132	240	6	7.37945	0.757084	1
Elevated hepatic transaminase	HP:0002910	0.813068	4293	220	240	10	12.2991	0.797376	1
Gray matter heterotopia	HP:0002282	0.813068	4293	66	240	3	3.68973	0.723264	1
Dyskinesia	HP:0100660	0.803933	4293	178	240	8	9.95108	0.788744	1
Joint hyperflexibility	HP:0005692	0.799441	4293	179	240	8	10.007	0.793865	1
Aplasia/Hypoplasia of the cerebellum	HP:0007360	0.798549	4293	112	240	5	6.26136	0.759956	1
Cirrhosis	HP:0001394	0.798549	4293	112	240	5	6.26136	0.759956	1
Nyctalopia	HP:0000662	0.797532	4293	157	240	7	8.77708	0.784976	1
Exertional dyspnea	HP:0002875	0.795	4293	90	240	4	5.03145	0.750388	1
Recurrent urinary tract infections	HP:0000010	0.795	4293	90	240	4	5.03145	0.750388	1
Hyporeflexia	HP:0001265	0.792484	4293	316	240	14	17.666	0.856763	1
Gastrointestinal hemorrhage	HP:0002239	0.791482	4293	113	240	5	6.31726	0.766796	1
Severe muscular hypotonia	HP:0006829	0.789154	4293	68	240	3	3.80154	0.741977	1
Thrombocytopenia	HP:0001873	0.78705	4293	250	240	11	13.9762	0.838164	1
Hematuria	HP:0000790	0.784539	4293	114	240	5	6.37317	0.773488	1
Retinopathy	HP:0000488	0.784539	4293	114	240	5	6.37317	0.773488	1
Specific learning disability	HP:0001328	0.782578	4293	160	240	7	8.94479	0.801103	1
Migraine	HP:0002076	0.777717	4293	138	240	6	7.71488	0.79359	1
Distal sensory impairment	HP:0002936	0.777717	4293	92	240	4	5.14326	0.765681	1
Dry skin	HP:0000958	0.777717	4293	138	240	6	7.71488	0.79359	1
Cutis marmorata	HP:0000965	0.777717	4293	69	240	3	3.85744	0.750951	1
Immunodeficiency	HP:0002721	0.777717	4293	161	240	7	9.0007	0.806271	1
Bilateral sensorineural hearing impairment	HP:0008619	0.777717	4293	69	240	3	3.85744	0.750951	1
Poor eye contact	HP:0000817	0.777717	4293	69	240	3	3.85744	0.750951	1
Gliosis	HP:0002171	0.777717	4293	69	240	3	3.85744	0.750951	1
Ataxia	HP:0001251	0.773978	4293	624	240	27	34.8847	0.946823	1
Skeletal muscle atrophy	HP:0003202	0.77255	4293	301	240	13	16.8274	0.872393	1
Dysarthria	HP:0001260	0.771013	4293	464	240	20	25.9399	0.919906	1
Nausea and vomiting	HP:0002017	0.769355	4293	186	240	8	10.3983	0.827164	1
Lethargy	HP:0001254	0.766607	4293	140	240	6	7.82669	0.804787	1
Asplenia	HP:0001746	0.766607	4293	70	240	3	3.91335	0.759675	1
Abnormality of vision	HP:0000504	0.757945	4293	118	240	5	6.59679	0.798801	1
Bulbous nose	HP:0000414	0.757945	4293	118	240	5	6.59679	0.798801	1
Renal insufficiency	HP:0000083	0.756779	4293	260	240	11	14.5353	0.872234	1
Difficulty walking	HP:0002355	0.75581	4293	213	240	9	11.9078	0.85295	1
Limb hypertonia	HP:0002509	0.75581	4293	71	240	3	3.96925	0.768151	1
Muscular hypotonia	HP:0001252	0.755467	4293	734	240	31	41.0342	0.971796	1
Abnormal retinal vascular morphology	HP:0008046	0.753158	4293	95	240	4	5.31097	0.787244	1
Developmental cataract	HP:0000519	0.753158	4293	95	240	4	5.31097	0.787244	1
Jaundice	HP:0000952	0.750524	4293	143	240	6	7.99441	0.820697	1
Syncope	HP:0001279	0.745313	4293	72	240	3	4.02516	0.776383	1
Hypermetropia	HP:0000540	0.739153	4293	121	240	5	6.7645	0.816294	1
Skin ulcer	HP:0200042	0.737629	4293	97	240	4	5.42278	0.800725	1
Hand polydactyly	HP:0001161	0.735103	4293	73	240	3	4.08106	0.784375	1
Stage 5 chronic kidney disease	HP:0003774	0.735103	4293	73	240	3	4.08106	0.784375	1
Pallor	HP:0000980	0.733094	4293	122	240	5	6.82041	0.821849	1
Dyspnea	HP:0002094	0.733094	4293	122	240	5	6.82041	0.821849	1
Headache	HP:0002315	0.730102	4293	147	240	6	8.21803	0.840304	1
Abdominal distention	HP:0003270	0.730102	4293	98	240	4	5.47869	0.807203	1
Weight loss	HP:0001824	0.726396	4293	197	240	8	11.0133	0.870908	1
Anorexia	HP:0002039	0.722727	4293	99	240	4	5.53459	0.81351	1
Ventriculomegaly	HP:0002119	0.717187	4293	424	240	17	23.7037	0.950965	1
Nephrotic syndrome	HP:0000100	0.709821	4293	126	240	5	7.04403	0.842734	1
Poor head control	HP:0002421	0.701471	4293	153	240	6	8.55346	0.866449	1
Erythema	HP:0010783	0.701471	4293	102	240	4	5.70231	0.831429	1
Skeletal dysplasia	HP:0002652	0.69466	4293	103	240	4	5.75821	0.837076	1
Neutropenia	HP:0001875	0.693314	4293	129	240	5	7.21174	0.857049	1
Cranial nerve paralysis	HP:0006824	0.687981	4293	78	240	3	4.36059	0.820873	1
Respiratory distress	HP:0002098	0.684221	4293	183	240	7	10.2306	0.895735	1
Multicystic kidney dysplasia	HP:0000003	0.681429	4293	105	240	4	5.87002	0.847899	1
Bronchiectasis	HP:0002110	0.681429	4293	105	240	4	5.87002	0.847899	1
Nail dysplasia	HP:0002164	0.679272	4293	79	240	3	4.41649	0.82751	1
Low posterior hairline	HP:0002162	0.679272	4293	79	240	3	4.41649	0.82751	1
Constipation	HP:0002019	0.677557	4293	264	240	10	14.7589	0.933862	1
Arthritis	HP:0001369	0.675	4293	106	240	4	5.92593	0.85308	1
Hallucinations	HP:0000738	0.667444	4293	134	240	5	7.49126	0.878495	1
Hypoplasia of the ulna	HP:0003022	0.6625	4293	54	240	2	3.01887	0.813976	1
Abnormal corpus callosum morphology	HP:0001273	0.6625	4293	54	240	2	3.01887	0.813976	1
Carious teeth	HP:0000670	0.6625	4293	162	240	6	9.0566	0.898963	1
Dystonia	HP:0001332	0.6625	4293	324	240	12	18.1132	0.958466	1
Delayed ability to walk	HP:0031936	0.6625	4293	81	240	3	4.5283	0.840156	1
Atrial fibrillation	HP:0005110	0.6625	4293	54	240	2	3.01887	0.813976	1
Retinal dystrophy	HP:0000556	0.654421	4293	82	240	3	4.58421	0.846175	1
Muscle weakness	HP:0001324	0.650455	4293	330	240	12	18.4486	0.964975	1
Cholelithiasis	HP:0001081	0.650455	4293	55	240	2	3.07477	0.821991	1
Telangiectasia of the skin	HP:0100585	0.650455	4293	55	240	2	3.07477	0.821991	1
Abnormality of skin pigmentation	HP:0001000	0.650455	4293	55	240	2	3.07477	0.821991	1
Lymphoma	HP:0002665	0.646536	4293	83	240	3	4.64011	0.851997	1
Irritability	HP:0000737	0.643435	4293	139	240	5	7.77079	0.897155	1
Areflexia	HP:0001284	0.642115	4293	195	240	7	10.9015	0.927825	1
Pes cavus	HP:0001761	0.641704	4293	223	240	8	12.4668	0.939393	1
Mental deterioration	HP:0001268	0.638839	4293	112	240	4	6.26136	0.881128	1
Congenital onset	HP:0003577	0.638839	4293	280	240	10	15.6534	0.95842	1
Nail dystrophy	HP:0008404	0.638839	4293	84	240	3	4.69602	0.857627	1
Thickened nuchal skin fold	HP:0000474	0.638839	4293	56	240	2	3.13068	0.829696	1
Cardiomegaly	HP:0001640	0.638839	4293	84	240	3	4.69602	0.857627	1
Childhood onset	HP:0011463	0.638839	4293	56	240	2	3.13068	0.829696	1
Neoplasm of the pancreas	HP:0002894	0.638839	4293	56	240	2	3.13068	0.829696	1
Apraxia	HP:0002186	0.638839	4293	56	240	2	3.13068	0.829696	1
Reduced tendon reflexes	HP:0001315	0.633186	4293	113	240	4	6.31726	0.885324	1
Hyperhidrosis	HP:0000975	0.633186	4293	113	240	4	6.31726	0.885324	1
Nephrolithiasis	HP:0000787	0.631324	4293	85	240	3	4.75192	0.863069	1
Abnormality of coagulation	HP:0001928	0.627632	4293	57	240	2	3.18658	0.8371	1
Progressive spastic paraplegia	HP:0007020	0.627632	4293	57	240	2	3.18658	0.8371	1
Hypermelanotic macule	HP:0001034	0.627632	4293	57	240	2	3.18658	0.8371	1
Decreased muscle mass	HP:0003199	0.627632	4293	57	240	2	3.18658	0.8371	1
Vasculitis	HP:0002633	0.627632	4293	57	240	2	3.18658	0.8371	1
Cerebral ischemia	HP:0002637	0.627632	4293	57	240	2	3.18658	0.8371	1
Recurrent respiratory infections	HP:0002205	0.61875	4293	318	240	11	17.7778	0.974087	1
Wide nose	HP:0000445	0.61681	4293	87	240	3	4.86373	0.87341	1
Sparse eyelashes	HP:0000653	0.61681	4293	58	240	2	3.24249	0.844212	1
Psychosis	HP:0000709	0.61681	4293	87	240	3	4.86373	0.87341	1
Pain	HP:0012531	0.61681	4293	58	240	2	3.24249	0.844212	1
Recurrent pneumonia	HP:0006532	0.61681	4293	58	240	2	3.24249	0.844212	1
Postural instability	HP:0002172	0.61681	4293	58	240	2	3.24249	0.844212	1
Decreased nerve conduction velocity	HP:0000762	0.61681	4293	58	240	2	3.24249	0.844212	1
Spontaneous abortion	HP:0005268	0.61681	4293	58	240	2	3.24249	0.844212	1
Elevated alkaline phosphatase	HP:0003155	0.61681	4293	58	240	2	3.24249	0.844212	1
Sparse hair	HP:0008070	0.611538	4293	117	240	4	6.54088	0.900847	1
Dementia	HP:0000726	0.608418	4293	147	240	5	8.21803	0.921879	1
Hip dysplasia	HP:0001385	0.606356	4293	118	240	4	6.59679	0.904428	1
Clitoral hypertrophy	HP:0008665	0.606356	4293	59	240	2	3.29839	0.851043	1
Progressive	HP:0003676	0.598467	4293	269	240	9	15.0384	0.970937	1
Gait disturbance	HP:0001288	0.59625	4293	300	240	10	16.7715	0.977583	1
Eczema	HP:0000964	0.59625	4293	90	240	3	5.03145	0.887633	1
Abnormality of dental enamel	HP:0000682	0.59625	4293	90	240	3	5.03145	0.887633	1
Foot polydactyly	HP:0001829	0.59625	4293	60	240	2	3.3543	0.857601	1
Postaxial hand polydactyly	HP:0001162	0.589698	4293	91	240	3	5.08735	0.892048	1
Oral cleft	HP:0000202	0.586475	4293	61	240	2	3.4102	0.863896	1
Cutaneous photosensitivity	HP:0000992	0.583288	4293	92	240	3	5.14326	0.896307	1
Lower limb muscle weakness	HP:0007340	0.577016	4293	62	240	2	3.46611	0.869935	1
Diabetes mellitus	HP:0000819	0.570878	4293	188	240	6	10.5101	0.957724	1
Juvenile onset	HP:0003621	0.570878	4293	94	240	3	5.25507	0.904378	1
Dysphonia	HP:0001618	0.567857	4293	63	240	2	3.52201	0.875728	1
Edema	HP:0000969	0.564868	4293	95	240	3	5.31097	0.908197	1
Unsteady gait	HP:0002317	0.563386	4293	127	240	4	7.09993	0.931847	1
Recurrent fractures	HP:0002757	0.563386	4293	127	240	4	7.09993	0.931847	1
Congestive heart failure	HP:0001635	0.558984	4293	192	240	6	10.7338	0.963313	1
Abnormality of the voice	HP:0001608	0.558984	4293	64	240	2	3.57792	0.881283	1
Convex nasal ridge	HP:0000444	0.558984	4293	64	240	2	3.57792	0.881283	1
EEG abnormality	HP:0002353	0.5565	4293	225	240	7	12.5786	0.97343	1
Decreased fetal movement	HP:0001558	0.545351	4293	164	240	5	9.16841	0.957755	1
Omphalocele	HP:0001539	0.542045	4293	66	240	2	3.68973	0.891713	1
Elevated serum creatine kinase	HP:0003236	0.539709	4293	232	240	7	12.97	0.979264	1
Hydrocephalus	HP:0000238	0.536625	4293	300	240	9	16.7715	0.98976	1
Cognitive impairment	HP:0100543	0.535955	4293	267	240	8	14.9266	0.985937	1
Alopecia	HP:0001596	0.535554	4293	167	240	5	9.33613	0.962248	1
Sensorimotor neuropathy	HP:0007141	0.533955	4293	67	240	2	3.74563	0.896604	1
Abnormal pyramidal sign	HP:0007256	0.533955	4293	134	240	4	7.49126	0.948041	1
Hypothyroidism	HP:0000821	0.531312	4293	202	240	6	11.2928	0.974474	1
Hypertrichosis	HP:0000998	0.526103	4293	68	240	2	3.80154	0.90129	1
Waddling gait	HP:0002515	0.526103	4293	102	240	3	5.70231	0.931294	1
Postnatal microcephaly	HP:0005484	0.526103	4293	68	240	2	3.80154	0.90129	1
Sepsis	HP:0100806	0.526103	4293	68	240	2	3.80154	0.90129	1
Muscular dystrophy	HP:0003560	0.526103	4293	68	240	2	3.80154	0.90129	1
Pigmentary retinopathy	HP:0000580	0.522263	4293	137	240	4	7.65898	0.95384	1
Aortic regurgitation	HP:0001659	0.518478	4293	69	240	2	3.85744	0.905778	1
Proteinuria	HP:0000093	0.51698	4293	173	240	5	9.67156	0.96995	1
Cough	HP:0012735	0.515986	4293	104	240	3	5.81412	0.93684	1
Coma	HP:0001259	0.511071	4293	70	240	2	3.91335	0.910075	1
Fine hair	HP:0002213	0.511071	4293	70	240	2	3.91335	0.910075	1
Ichthyosis	HP:0008064	0.507447	4293	141	240	4	7.8826	0.960651	1
Status epilepticus	HP:0002133	0.50625	4293	106	240	3	5.92593	0.941971	1
Diplopia	HP:0000651	0.503873	4293	71	240	2	3.96925	0.914189	1
Scapular winging	HP:0003691	0.496875	4293	72	240	2	4.02516	0.918126	1
Fatigue	HP:0012378	0.495346	4293	325	240	9	18.1691	0.995854	1
Cachexia	HP:0004326	0.490068	4293	73	240	2	4.08106	0.921894	1
Corneal opacity	HP:0007957	0.487841	4293	110	240	3	6.14955	0.951099	1
Abnormality of neutrophils	HP:0001874	0.483446	4293	74	240	2	4.13697	0.925498	1
Hypoglycemia	HP:0001943	0.480201	4293	149	240	4	8.32984	0.971576	1
Dehydration	HP:0001944	0.477	4293	75	240	2	4.19287	0.928946	1
Pancreatitis	HP:0001733	0.477	4293	75	240	2	4.19287	0.928946	1
Proximal muscle weakness	HP:0003701	0.474889	4293	113	240	3	6.31726	0.95705	1
Hepatic failure	HP:0001399	0.474889	4293	113	240	3	6.31726	0.95705	1
Respiratory insufficiency	HP:0002093	0.470724	4293	304	240	8	16.9951	0.996439	1
Poor suck	HP:0002033	0.470724	4293	76	240	2	4.24878	0.932243	1
Reduced bone mineral density	HP:0004349	0.470724	4293	76	240	2	4.24878	0.932243	1
Vomiting	HP:0002013	0.463407	4293	193	240	5	10.7897	0.986361	1
Distal muscle weakness	HP:0002460	0.462608	4293	116	240	3	6.48498	0.96232	1
Arrhythmia	HP:0011675	0.458654	4293	156	240	4	8.72117	0.978748	1
Respiratory failure	HP:0002878	0.455732	4293	157	240	4	8.77708	0.979621	1
Hepatosplenomegaly	HP:0001433	0.452848	4293	79	240	2	4.41649	0.94129	1
Inability to walk	HP:0002540	0.447188	4293	120	240	3	6.7086	0.968408	1
Apnea	HP:0002104	0.441667	4293	162	240	4	9.0566	0.983507	1
Spastic tetraplegia	HP:0002510	0.441667	4293	81	240	2	4.5283	0.946673	1
EMG abnormality	HP:0003457	0.43628	4293	123	240	3	6.87631	0.972354	1
Ophthalmoplegia	HP:0000602	0.43628	4293	205	240	5	11.4605	0.991675	1
Chest pain	HP:0100749	0.43628	4293	82	240	2	4.58421	0.949185	1
Sparse scalp hair	HP:0002209	0.425893	4293	84	240	2	4.69602	0.953877	1
Premature birth	HP:0001622	0.422539	4293	127	240	3	7.09993	0.976896	1
Respiratory insufficiency due to muscle weakness	HP:0002747	0.420882	4293	85	240	2	4.75192	0.956065	1
Arthrogryposis multiplex congenita	HP:0002804	0.415988	4293	129	240	3	7.21174	0.978892	1
Muscle spasm	HP:0003394	0.409637	4293	131	240	3	7.32355	0.980724	1
Myopathy	HP:0003198	0.399275	4293	224	240	5	12.5227	0.99629	1
Tetralogy of Fallot	HP:0001636	0.394577	4293	136	240	3	7.60307	0.984666	1
Nasal speech	HP:0001611	0.388859	4293	92	240	2	5.14326	0.968829	1
Dilated cardiomyopathy	HP:0001644	0.388859	4293	138	240	3	7.71488	0.986017	1
Peripheral neuropathy	HP:0009830	0.384677	4293	186	240	4	10.3983	0.994225	1
Psychomotor retardation	HP:0025356	0.384677	4293	93	240	2	5.19916	0.970332	1
Leukodystrophy	HP:0002415	0.376579	4293	95	240	2	5.31097	0.973133	1
Nephropathy	HP:0000112	0.376579	4293	95	240	2	5.31097	0.973133	1
Paresthesia	HP:0003401	0.35775	4293	100	240	2	5.5905	0.979066	1
Generalized myoclonic seizures	HP:0002123	0.35775	4293	100	240	2	5.5905	0.979066	1
Situs inversus totalis	HP:0001696	0.354208	4293	101	240	2	5.6464	0.980091	1
Pneumonia	HP:0002090	0.34733	4293	103	240	2	5.75821	0.981996	1
Pulmonary arterial hypertension	HP:0002092	0.33125	4293	108	240	2	6.03774	0.98602	1
Lactic acidosis	HP:0003128	0.33125	4293	162	240	3	9.0566	0.995501	1
Rhinitis	HP:0012384	0.33125	4293	54	240	1	3.01887	0.956127	1
Xerostomia	HP:0000217	0.33125	4293	54	240	1	3.01887	0.956127	1
Hypokalemia	HP:0002900	0.33125	4293	54	240	1	3.01887	0.956127	1
Conjunctivitis	HP:0000509	0.33125	4293	54	240	1	3.01887	0.956127	1
Encephalopathy	HP:0001298	0.329218	4293	163	240	3	9.11251	0.995713	1
EMG: myopathic abnormalities	HP:0003458	0.328211	4293	109	240	2	6.09364	0.986713	1
Restrictive ventilatory defect	HP:0002091	0.325227	4293	55	240	1	3.07477	0.95861	1
Hemoptysis	HP:0002105	0.325227	4293	55	240	1	3.07477	0.95861	1
Nausea	HP:0002018	0.31942	4293	56	240	1	3.13068	0.960954	1
Clonus	HP:0002169	0.313816	4293	57	240	1	3.18658	0.963166	1
Paralysis	HP:0003470	0.313816	4293	57	240	1	3.18658	0.963166	1
Generalized muscle weakness	HP:0003324	0.305769	4293	117	240	2	6.54088	0.991177	1
Infertility	HP:0000789	0.30063	4293	119	240	2	6.65269	0.992041	1
Fatigable weakness of respiratory muscles	HP:0030196	0.298125	4293	60	240	1	3.3543	0.96908	1
Hypoplasia of dental enamel	HP:0006297	0.298125	4293	60	240	1	3.3543	0.96908	1
Aminoaciduria	HP:0003355	0.298125	4293	60	240	1	3.3543	0.96908	1
Hypocalcemia	HP:0002901	0.293238	4293	61	240	1	3.4102	0.970833	1
Stroke	HP:0001297	0.288508	4293	62	240	1	3.46611	0.972487	1
Mildly elevated creatine kinase	HP:0008180	0.283929	4293	63	240	1	3.52201	0.974048	1
Abnormality of the ribs	HP:0000772	0.283929	4293	63	240	1	3.52201	0.974048	1
Chronic otitis media	HP:0000389	0.281693	4293	127	240	2	7.09993	0.994744	1
Polyhydramnios	HP:0001561	0.275192	4293	195	240	3	10.9015	0.999118	1
Pectus carinatum	HP:0000768	0.275192	4293	130	240	2	7.26765	0.995506	1
Meningitis	HP:0001287	0.275192	4293	65	240	1	3.63382	0.97691	1
Progressive microcephaly	HP:0000253	0.271023	4293	66	240	1	3.68973	0.97822	1
Neurodegeneration	HP:0002180	0.266978	4293	67	240	1	3.74563	0.979457	1
Recurrent bacterial infections	HP:0002718	0.263051	4293	68	240	1	3.80154	0.980624	1
Foot dorsiflexor weakness	HP:0009027	0.259239	4293	69	240	1	3.85744	0.981724	1
Easy fatigability	HP:0003388	0.259239	4293	69	240	1	3.85744	0.981724	1
Exercise intolerance	HP:0003546	0.248438	4293	72	240	1	4.02516	0.984666	1
Lipoatrophy	HP:0100578	0.232305	4293	77	240	1	4.30468	0.988559	1
Hypertrophic cardiomyopathy	HP:0001639	0.229327	4293	234	240	3	13.0818	0.999882	1
Corneal dystrophy	HP:0001131	0.229327	4293	78	240	1	4.36059	0.98921	1
Tachypnea	HP:0002789	0.223594	4293	80	240	1	4.4724	0.990404	1
Color vision defect	HP:0000551	0.220833	4293	81	240	1	4.5283	0.990951	1
Hemiparesis	HP:0001269	0.220833	4293	81	240	1	4.5283	0.990951	1
Peripheral axonal neuropathy	HP:0003477	0.21814	4293	82	240	1	4.58421	0.991466	1
Increased serum lactate	HP:0002151	0.209211	4293	171	240	2	9.55975	0.999497	1
Agitation	HP:0000713	0.203267	4293	88	240	1	4.91964	0.994	1
Frequent falls	HP:0002359	0.196566	4293	91	240	1	5.08735	0.99497	1
Pruritus	HP:0000989	0.178875	4293	100	240	1	5.5905	0.997039	1
Emotional lability	HP:0000712	0.162614	4293	110	240	1	6.14955	0.998359	1
Asthma	HP:0002099	0.1431	4293	125	240	1	6.98812	0.999325	1
Left ventricular hypertrophy	HP:0001712	0	4293	78	240	0	4.36059	1	1
Metabolic acidosis	HP:0001942	0	4293	81	240	0	4.5283	1	1
Generalized amyotrophy	HP:0003700	0	4293	54	240	0	3.01887	1	1
Spinal rigidity	HP:0003306	0	4293	55	240	0	3.07477	1	1
Autoimmunity	HP:0002960	0	4293	72	240	0	4.02516	1	1
Multiple joint contractures	HP:0002828	0	4293	54	240	0	3.01887	1	1
Atelectasis	HP:0100750	0	4293	62	240	0	3.46611	1	1
Ragged-red muscle fibers	HP:0003200	0	4293	58	240	0	3.24249	1	1
Mitochondrial myopathy	HP:0003737	0	4293	63	240	0	3.52201	1	1
Increased CSF lactate	HP:0002490	0	4293	87	240	0	4.86373	1	1
Leukoencephalopathy	HP:0002352	0	4293	83	240	0	4.64011	1	1
Abnormal thyroid hormone level	HP:0031508	17.8875	4293	1	240	1	0.055905	0.055905
Hyperextensible thumb	HP:0005722	17.8875	4293	1	240	1	0.055905	0.055905
Abnormality of the periodontium	HP:0410026	17.8875	4293	1	240	1	0.055905	0.055905
5-minute APGAR score of 5	HP:0030925	17.8875	4293	1	240	1	0.055905	0.055905
1-minute APGAR score of 1	HP:0030928	17.8875	4293	1	240	1	0.055905	0.055905
Curved fingers	HP:0004095	17.8875	4293	1	240	1	0.055905	0.055905
Low pulse pressure	HP:0030851	17.8875	4293	1	240	1	0.055905	0.055905
Increased alpha-globulin	HP:0005413	17.8875	4293	1	240	1	0.055905	0.055905
Gonadal neoplasm	HP:0010785	17.8875	4293	1	240	1	0.055905	0.055905
Short nasal septum	HP:0000420	17.8875	4293	2	240	2	0.11181	0.00311307
Increased red cell osmotic resistance	HP:0005546	17.8875	4293	1	240	1	0.055905	0.055905
Hyperchloremic acidosis	HP:0001995	17.8875	4293	1	240	1	0.055905	0.055905
Bicarbonate-wasting renal tubular acidosis	HP:0004910	17.8875	4293	1	240	1	0.055905	0.055905
Enlarged epiphyses of the distal phalanges of the hand	HP:0010249	17.8875	4293	1	240	1	0.055905	0.055905
Bridged palmar crease	HP:0011310	17.8875	4293	1	240	1	0.055905	0.055905
Accessory scrotum	HP:0030274	17.8875	4293	1	240	1	0.055905	0.055905
Thyroglossal cyst	HP:0010518	17.8875	4293	1	240	1	0.055905	0.055905
Overjet	HP:0011095	17.8875	4293	1	240	1	0.055905	0.055905
Absent mastoid	HP:0012761	17.8875	4293	1	240	1	0.055905	0.055905
Pseudoepiphyses of hand bones	HP:0004288	17.8875	4293	1	240	1	0.055905	0.055905
Subcortical heterotopia	HP:0032391	17.8875	4293	1	240	1	0.055905	0.055905
Abnormality of higher mental function	HP:0011446	17.8875	4293	1	240	1	0.055905	0.055905
Hepatic vascular malformations	HP:0006576	17.8875	4293	1	240	1	0.055905	0.055905
Retinal vascular malformation	HP:0007797	17.8875	4293	1	240	1	0.055905	0.055905
Attached earlobe	HP:0009907	17.8875	4293	1	240	1	0.055905	0.055905
Abnormality of dentin	HP:0010299	17.8875	4293	1	240	1	0.055905	0.055905
Rootless teeth	HP:0011072	17.8875	4293	1	240	1	0.055905	0.055905
Abnormality of the shape of the midface	HP:0430026	17.8875	4293	1	240	1	0.055905	0.055905
Exodeviation	HP:0020049	17.8875	4293	1	240	1	0.055905	0.055905
Upper limb peromelia	HP:0009814	17.8875	4293	1	240	1	0.055905	0.055905
Amelia involving the lower limbs	HP:0009818	17.8875	4293	1	240	1	0.055905	0.055905
Advanced pneumatization of the mastoid process	HP:0010724	17.8875	4293	1	240	1	0.055905	0.055905
Gluten intolerance	HP:0012538	17.8875	4293	2	240	2	0.11181	0.00311307
Irregular distal femoral epiphysis	HP:0006407	17.8875	4293	2	240	2	0.11181	0.00311307
Flat distal femoral epiphysis	HP:0006398	17.8875	4293	1	240	1	0.055905	0.055905
Distal tibial bowing	HP:0006414	17.8875	4293	1	240	1	0.055905	0.055905
Proximal femoral metaphyseal abnormality	HP:0006431	17.8875	4293	1	240	1	0.055905	0.055905
Broad middle phalanx of finger	HP:0009844	17.8875	4293	1	240	1	0.055905	0.055905
Irregular proximal tibial epiphyses	HP:0006456	17.8875	4293	1	240	1	0.055905	0.055905
Widely patent coronal suture	HP:0005442	17.8875	4293	1	240	1	0.055905	0.055905
Widely patent sagittal suture	HP:0005476	17.8875	4293	1	240	1	0.055905	0.055905
Meningeal calcification	HP:0100250	17.8875	4293	1	240	1	0.055905	0.055905
Wide tufts of distal phalanges	HP:0006095	17.8875	4293	1	240	1	0.055905	0.055905
Small distal femoral epiphysis	HP:0012283	17.8875	4293	1	240	1	0.055905	0.055905
Small proximal tibial epiphyses	HP:0012284	17.8875	4293	1	240	1	0.055905	0.055905
Tongue tremor	HP:0031947	17.8875	4293	1	240	1	0.055905	0.055905
Increased corneal thickness	HP:0011487	17.8875	4293	1	240	1	0.055905	0.055905
Mosaic corneal dystrophy	HP:0007836	17.8875	4293	1	240	1	0.055905	0.055905
Proportionate tall stature	HP:0011407	17.8875	4293	1	240	1	0.055905	0.055905
Supraventricular tachycardia with an accessory connection mediated pathway	HP:0011688	17.8875	4293	1	240	1	0.055905	0.055905
Anterolateral radial head dislocation	HP:0005050	17.8875	4293	1	240	1	0.055905	0.055905
Aplasia of the maxilla	HP:0010667	17.8875	4293	1	240	1	0.055905	0.055905
Agenesis of premolar	HP:0011051	17.8875	4293	2	240	2	0.11181	0.00311307
Agenesis of molar	HP:0011054	17.8875	4293	1	240	1	0.055905	0.055905
Hypoplastic-absent sebaceous glands	HP:0007411	17.8875	4293	1	240	1	0.055905	0.055905
Recurrent bronchiolitis	HP:0100501	17.8875	4293	1	240	1	0.055905	0.055905
Asterixis	HP:0012164	17.8875	4293	1	240	1	0.055905	0.055905
Mania	HP:0100754	17.8875	4293	1	240	1	0.055905	0.055905
Decreased body mass index	HP:0045082	17.8875	4293	1	240	1	0.055905	0.055905
Abnormal circulating arginine concentration	HP:0010909	17.8875	4293	1	240	1	0.055905	0.055905
Abnormal circulating alanine concentration	HP:0010916	17.8875	4293	1	240	1	0.055905	0.055905
Sleep terror	HP:0030765	17.8875	4293	1	240	1	0.055905	0.055905
Subcortical white matter calcifications	HP:0007346	17.8875	4293	1	240	1	0.055905	0.055905
Cerebellar calcifications	HP:0007352	17.8875	4293	1	240	1	0.055905	0.055905
Second metatarsal posteriorly placed	HP:0008125	17.8875	4293	1	240	1	0.055905	0.055905
Pigmentation anomalies of sun-exposed skin	HP:0007623	17.8875	4293	1	240	1	0.055905	0.055905
Congenital kyphoscoliosis	HP:0008453	17.8875	4293	1	240	1	0.055905	0.055905
Linear arrays of macular hyperkeratoses in flexural areas	HP:0007490	17.8875	4293	1	240	1	0.055905	0.055905
Abnormality of the maxilla	HP:0000326	17.8875	4293	1	240	1	0.055905	0.055905
Aplasia of the inner ear	HP:0011372	17.8875	4293	1	240	1	0.055905	0.055905
Lens coloboma	HP:0100719	17.8875	4293	1	240	1	0.055905	0.055905
Otitis media with effusion	HP:0031353	17.8875	4293	1	240	1	0.055905	0.055905
Impaired tandem gait	HP:0031629	17.8875	4293	1	240	1	0.055905	0.055905
Congenital macroorchidism	HP:0008640	17.8875	4293	1	240	1	0.055905	0.055905
Folate-dependent fragile site at Xq28	HP:0003564	17.8875	4293	1	240	1	0.055905	0.055905
Intraalveolar nodular calcifications	HP:0006514	17.8875	4293	1	240	1	0.055905	0.055905
Diffuse	HP:0020034	17.8875	4293	1	240	1	0.055905	0.055905
Nonprogressive visual loss	HP:0200068	17.8875	4293	1	240	1	0.055905	0.055905
Detrusor sphincter dyssynergia	HP:0025488	17.8875	4293	1	240	1	0.055905	0.055905
Capillary leak	HP:0030005	17.8875	4293	1	240	1	0.055905	0.055905
Distal urethral duplication	HP:0008706	17.8875	4293	1	240	1	0.055905	0.055905
Preductal coarctation of the aorta	HP:0005151	17.8875	4293	1	240	1	0.055905	0.055905
Dysplastic distal thumb phalanges with a central hole	HP:0005688	17.8875	4293	1	240	1	0.055905	0.055905
Absent hallux	HP:0012386	17.8875	4293	1	240	1	0.055905	0.055905
Bilateral renal agenesis	HP:0010958	17.8875	4293	1	240	1	0.055905	0.055905
Polydactyly affecting the 3rd finger	HP:0009958	17.8875	4293	1	240	1	0.055905	0.055905
Polydactyly affecting the 4th finger	HP:0009971	17.8875	4293	1	240	1	0.055905	0.055905
Proximal tibial and fibular fusion	HP:0005892	17.8875	4293	1	240	1	0.055905	0.055905
Aplasia/Hypoplasia of the vagina	HP:0011026	17.8875	4293	1	240	1	0.055905	0.055905
Rudimentary to absent tibiae	HP:0006426	17.8875	4293	1	240	1	0.055905	0.055905
Aplasia of the 2nd metacarpal	HP:0010037	17.8875	4293	1	240	1	0.055905	0.055905
Aplasia of the 4th metacarpal	HP:0010043	17.8875	4293	1	240	1	0.055905	0.055905
Auricular tag	HP:0030021	17.8875	4293	1	240	1	0.055905	0.055905
Partial absence of foot	HP:0030032	17.8875	4293	1	240	1	0.055905	0.055905
Mesoaxial foot polydactyly	HP:0010112	17.8875	4293	2	240	2	0.11181	0.00311307
1-3 toe syndactyly	HP:0001459	17.8875	4293	1	240	1	0.055905	0.055905
1-5 toe syndactyly	HP:0010713	17.8875	4293	1	240	1	0.055905	0.055905
Bilateral postaxial polydactyly	HP:0006136	17.8875	4293	1	240	1	0.055905	0.055905
Thyroid dysgenesis	HP:0008188	17.8875	4293	1	240	1	0.055905	0.055905
Hypomature dental enamel	HP:0011085	17.8875	4293	1	240	1	0.055905	0.055905
Vertebrobasilar dolichoectasia	HP:0020038	17.8875	4293	1	240	1	0.055905	0.055905
Abnormality of the palmar creases	HP:0010490	17.8875	4293	1	240	1	0.055905	0.055905
Telangiectasia macularis eruptiva perstans	HP:0007583	17.8875	4293	1	240	1	0.055905	0.055905
Cutaneous mastocytosis	HP:0200151	17.8875	4293	1	240	1	0.055905	0.055905
Tented philtrum	HP:0011825	17.8875	4293	1	240	1	0.055905	0.055905
Progressive hyperpigmentation	HP:0007505	17.8875	4293	1	240	1	0.055905	0.055905
Diaphyseal cortical sclerosis	HP:0005045	17.8875	4293	2	240	2	0.11181	0.00311307
Screwdriver-shaped incisors	HP:0006346	17.8875	4293	1	240	1	0.055905	0.055905
Mulberry molar	HP:0011092	17.8875	4293	1	240	1	0.055905	0.055905
Abnormal liver lobulation	HP:0100752	17.8875	4293	1	240	1	0.055905	0.055905
Unossified sacrum	HP:0030290	17.8875	4293	1	240	1	0.055905	0.055905
Absent in utero rib ossification	HP:0006615	17.8875	4293	1	240	1	0.055905	0.055905
Absent in utero ossification of vertebral bodies	HP:0008435	17.8875	4293	1	240	1	0.055905	0.055905
Disorganization of the anterior cerebellar vermis	HP:0007065	17.8875	4293	1	240	1	0.055905	0.055905
Abnormal foveal morphology on macular OCT	HP:0030613	17.8875	4293	1	240	1	0.055905	0.055905
Dysfunctional alternative complement pathway	HP:0005423	17.8875	4293	1	240	1	0.055905	0.055905
Generalized reticulate brown pigmentation	HP:0007599	17.8875	4293	1	240	1	0.055905	0.055905
Unilateral vocal cord paralysis	HP:0008757	17.8875	4293	1	240	1	0.055905	0.055905
Dysplastic gangliocytoma of the cerebellum	HP:0500009	17.8875	4293	1	240	1	0.055905	0.055905
Laterally curved eyebrow	HP:0007733	17.8875	4293	1	240	1	0.055905	0.055905
Flexion contracture of the 2nd toe	HP:0010327	17.8875	4293	1	240	1	0.055905	0.055905
Flexion contracture of the 4th toe	HP:0010339	17.8875	4293	1	240	1	0.055905	0.055905
Increased rate of premature chromosome condensation	HP:0003451	17.8875	4293	1	240	1	0.055905	0.055905
Splenic cyst	HP:0030423	17.8875	4293	1	240	1	0.055905	0.055905
Mizuo phenomenon	HP:0030824	17.8875	4293	1	240	1	0.055905	0.055905
Peripheral cystoid retinal degeneration	HP:0007667	17.8875	4293	1	240	1	0.055905	0.055905
Chronic acidosis	HP:0012468	17.8875	4293	1	240	1	0.055905	0.055905
Double outlet right ventricle with doubly committed ventricular septal defect and pulmonary stenosis	HP:0011651	17.8875	4293	1	240	1	0.055905	0.055905
Low 1-minute APGAR score	HP:0030918	17.8875	4293	1	240	1	0.055905	0.055905
Abnormality of the columella	HP:0009929	17.8875	4293	1	240	1	0.055905	0.055905
Camptodactyly of 2nd-5th fingers	HP:0001215	17.8875	4293	1	240	1	0.055905	0.055905
True anophthalmia	HP:0011478	17.8875	4293	1	240	1	0.055905	0.055905
Congenital foot contractures	HP:0005745	17.8875	4293	1	240	1	0.055905	0.055905
Snail-like ilia	HP:0031026	17.8875	4293	1	240	1	0.055905	0.055905
EEG with temporal focal spikes	HP:0012018	17.8875	4293	1	240	1	0.055905	0.055905
Synostosis of carpals/tarsals	HP:0100266	17.8875	4293	1	240	1	0.055905	0.055905
Ectopic thymus tissue	HP:0010517	17.8875	4293	1	240	1	0.055905	0.055905
Supraauricular pit	HP:0008606	17.8875	4293	1	240	1	0.055905	0.055905
Upper lip pit	HP:0100268	17.8875	4293	1	240	1	0.055905	0.055905
Branchial anomaly	HP:0009794	17.8875	4293	1	240	1	0.055905	0.055905
Fusion of middle ear ossicles	HP:0005473	17.8875	4293	1	240	1	0.055905	0.055905
Postauricular pit	HP:0004464	17.8875	4293	1	240	1	0.055905	0.055905
Parasomnia	HP:0025234	17.8875	4293	1	240	1	0.055905	0.055905
Distal/middle symphalangism of 5th finger	HP:0009244	17.8875	4293	1	240	1	0.055905	0.055905
No permanent dentition	HP:0008498	17.8875	4293	1	240	1	0.055905	0.055905
Symphalangism of the 5th finger	HP:0004218	17.8875	4293	1	240	1	0.055905	0.055905
Unilateral radial aplasia	HP:0011908	17.8875	4293	1	240	1	0.055905	0.055905
Ultra-low vision with retained motion projection	HP:0032284	17.8875	4293	1	240	1	0.055905	0.055905
Cervicomedullary schisis	HP:0030325	17.8875	4293	1	240	1	0.055905	0.055905
Areolar fullness	HP:0032315	17.8875	4293	1	240	1	0.055905	0.055905
Congenital palmoplantar keratodermia	HP:0007597	17.8875	4293	1	240	1	0.055905	0.055905
Short proximal phalanx of the 5th finger	HP:0009226	17.8875	4293	1	240	1	0.055905	0.055905
Short proximal phalanx of the 2nd finger	HP:0009597	17.8875	4293	1	240	1	0.055905	0.055905
Infection associated neutropenia	HP:0410256	17.8875	4293	1	240	1	0.055905	0.055905
Patellar subluxation	HP:0010499	11.925	4293	3	240	2	0.167715	0.00899387
Thrombophlebitis	HP:0004418	11.925	4293	3	240	2	0.167715	0.00899387
Fused fourth and fifth metacarpals	HP:0005867	11.925	4293	3	240	2	0.167715	0.00899387
Paroxysmal supraventricular tachycardia	HP:0004763	11.925	4293	3	240	2	0.167715	0.00899387
Highly elevated creatine kinase	HP:0030234	11.925	4293	3	240	2	0.167715	0.00899387
Laterally extended eyebrow	HP:0011230	11.925	4293	3	240	2	0.167715	0.00899387
Infra-orbital crease	HP:0100876	11.925	4293	3	240	2	0.167715	0.00899387
Cow milk allergy	HP:0100327	11.925	4293	3	240	2	0.167715	0.00899387
Posterior vertebral hypoplasia	HP:0008451	11.925	4293	3	240	2	0.167715	0.00899387
Congenital ptosis	HP:0007970	11.925	4293	3	240	2	0.167715	0.00899387
Question mark ear	HP:0030022	11.925	4293	3	240	2	0.167715	0.00899387
Mandibular condyle aplasia	HP:0007627	11.925	4293	3	240	2	0.167715	0.00899387
Mandibular condyle hypoplasia	HP:0007628	11.925	4293	3	240	2	0.167715	0.00899387
Abnormality of the crus of the helix	HP:0009895	11.925	4293	3	240	2	0.167715	0.00899387
Cleft helix	HP:0009902	11.925	4293	3	240	2	0.167715	0.00899387
Laryngeal cleft	HP:0008751	11.925	4293	3	240	2	0.167715	0.00899387
Cleft of chin	HP:0011323	11.925	4293	3	240	2	0.167715	0.00899387
Trichilemmoma	HP:0012844	11.925	4293	3	240	2	0.167715	0.00899387
Electronegative electroretinogram	HP:0007984	11.925	4293	3	240	2	0.167715	0.00899387
Body odor	HP:0500001	8.94375	4293	2	240	1	0.11181	0.108697
Unilateral breast hypoplasia	HP:0012813	8.94375	4293	2	240	1	0.11181	0.108697
Abnormality of thyroid physiology	HP:0002926	8.94375	4293	2	240	1	0.11181	0.108697
Ciliary body coloboma	HP:0020006	8.94375	4293	2	240	1	0.11181	0.108697
Phonic tics	HP:0100035	8.94375	4293	2	240	1	0.11181	0.108697
Hair-pulling	HP:0012167	8.94375	4293	2	240	1	0.11181	0.108697
Congenital bilateral hip dislocation	HP:0008780	8.94375	4293	2	240	1	0.11181	0.108697
Absent nasal bridge	HP:0005285	8.94375	4293	2	240	1	0.11181	0.108697
Thymus hyperplasia	HP:0010516	8.94375	4293	2	240	1	0.11181	0.108697
Neoplasm of the thymus	HP:0100521	8.94375	4293	2	240	1	0.11181	0.108697
Odontoma	HP:0011068	8.94375	4293	2	240	1	0.11181	0.108697
Aplasia/Hypoplasia of the fallopian tube	HP:0008655	8.94375	4293	2	240	1	0.11181	0.108697
Fava bean-induced hemolytic anemia	HP:0004814	8.94375	4293	2	240	1	0.11181	0.108697
Aplasia/Hypoplasia involving the central nervous system	HP:0002977	8.94375	4293	2	240	1	0.11181	0.108697
Lower lip pit	HP:0000196	8.94375	4293	4	240	2	0.22362	0.0173257
Acrokeratosis	HP:0200016	8.94375	4293	2	240	1	0.11181	0.108697
Brain imaging abnormality	HP:0410263	8.94375	4293	2	240	1	0.11181	0.108697
Excessive femoral anteversion	HP:0012427	8.94375	4293	2	240	1	0.11181	0.108697
Hypoplastic philtrum	HP:0005326	8.94375	4293	2	240	1	0.11181	0.108697
Paroxysmal bursts of laughter	HP:0000749	8.94375	4293	4	240	2	0.22362	0.0173257
Abnormal pulmonary valve cusp morphology	HP:0031566	8.94375	4293	2	240	1	0.11181	0.108697
Triangular nasal tip	HP:0000451	8.94375	4293	2	240	1	0.11181	0.108697
Abnormality of the epididymis	HP:0009714	8.94375	4293	2	240	1	0.11181	0.108697
Reduced protein S activity	HP:0004855	8.94375	4293	2	240	1	0.11181	0.108697
Enlargement of the proximal femoral epiphysis	HP:0003371	8.94375	4293	2	240	1	0.11181	0.108697
Hemangioblastoma	HP:0010797	8.94375	4293	2	240	1	0.11181	0.108697
Freckled genitalia	HP:0030257	8.94375	4293	2	240	1	0.11181	0.108697
Abnormality of the nasal bone	HP:0010939	8.94375	4293	2	240	1	0.11181	0.108697
Abnormality of the frontal bone	HP:0430000	8.94375	4293	2	240	1	0.11181	0.108697
Cortical diaphyseal thickening of the upper limbs	HP:0003859	8.94375	4293	2	240	1	0.11181	0.108697
Calf muscle hypoplasia	HP:0008962	8.94375	4293	2	240	1	0.11181	0.108697
Abnormal muscle fiber morphology	HP:0004303	8.94375	4293	2	240	1	0.11181	0.108697
Elevated plasma citrulline	HP:0011966	8.94375	4293	2	240	1	0.11181	0.108697
Abnormal circulating serine concentration	HP:0012278	8.94375	4293	2	240	1	0.11181	0.108697
Abnormal speech discrimination	HP:0001963	8.94375	4293	2	240	1	0.11181	0.108697
Abnormality of limb bone morphology	HP:0002813	8.94375	4293	2	240	1	0.11181	0.108697
Abnormality of the vertebral spinous processes	HP:0008516	8.94375	4293	2	240	1	0.11181	0.108697
Periorbital wrinkles	HP:0000607	8.94375	4293	4	240	2	0.22362	0.0173257
Gonadal hypoplasia	HP:0008639	8.94375	4293	2	240	1	0.11181	0.108697
Patchy demyelination of subcortical white matter	HP:0002545	8.94375	4293	2	240	1	0.11181	0.108697
Absence of acoustic reflex	HP:0008529	8.94375	4293	2	240	1	0.11181	0.108697
Duplication of internal organs	HP:0005217	8.94375	4293	2	240	1	0.11181	0.108697
Abnormal vitreous humor morphology	HP:0004327	8.94375	4293	2	240	1	0.11181	0.108697
Schmorl's node	HP:0030041	8.94375	4293	2	240	1	0.11181	0.108697
Dumbbell-shaped long bone	HP:0000947	8.94375	4293	4	240	2	0.22362	0.0173257
Degenerative vitreoretinopathy	HP:0007964	8.94375	4293	2	240	1	0.11181	0.108697
Arthralgia of the hip	HP:0003365	8.94375	4293	2	240	1	0.11181	0.108697
Metaphyseal cupping of proximal phalanges	HP:0006208	8.94375	4293	2	240	1	0.11181	0.108697
Broad ischia	HP:0100865	8.94375	4293	2	240	1	0.11181	0.108697
Abnormal temporal bone morphology	HP:0009911	8.94375	4293	2	240	1	0.11181	0.108697
Progressive language deterioration	HP:0007064	8.94375	4293	2	240	1	0.11181	0.108697
Periauricular skin pits	HP:0100277	8.94375	4293	4	240	2	0.22362	0.0173257
Retinal hole	HP:0011530	8.94375	4293	2	240	1	0.11181	0.108697
Macroorchidism, postpubertal	HP:0002050	8.94375	4293	2	240	1	0.11181	0.108697
EMG: axonal abnormality	HP:0003482	8.94375	4293	4	240	2	0.22362	0.0173257
Congenital corneal dystrophy	HP:0008005	8.94375	4293	2	240	1	0.11181	0.108697
Elevated 8-dehydrocholesterol	HP:0003462	8.94375	4293	2	240	1	0.11181	0.108697
Elevated 8(9)-cholestenol	HP:0003465	8.94375	4293	2	240	1	0.11181	0.108697
Abnormal digit morphology	HP:0011297	8.94375	4293	2	240	1	0.11181	0.108697
Mild intrauterine growth retardation	HP:0008883	8.94375	4293	2	240	1	0.11181	0.108697
Aplasia/hypoplasia of the extremities	HP:0009815	8.94375	4293	2	240	1	0.11181	0.108697
Abnormal peripheral myelination	HP:0003130	8.94375	4293	2	240	1	0.11181	0.108697
Iris transillumination defect	HP:0012805	8.94375	4293	2	240	1	0.11181	0.108697
Deep anterior chamber	HP:0007765	8.94375	4293	2	240	1	0.11181	0.108697
Abnormally folded helix	HP:0008544	8.94375	4293	2	240	1	0.11181	0.108697
Neuroendocrine neoplasm	HP:0100634	8.94375	4293	2	240	1	0.11181	0.108697
Reduced dihydropyrimidine dehydrogenase activity	HP:0003654	8.94375	4293	2	240	1	0.11181	0.108697
Hypoplastic distal humeri	HP:0005025	8.94375	4293	2	240	1	0.11181	0.108697
Periorbital hyperpigmentation	HP:0001106	8.94375	4293	4	240	2	0.22362	0.0173257
Abnormality of the temporomandibular joint	HP:0010754	8.94375	4293	4	240	2	0.22362	0.0173257
Vein of Galen aneurysmal malformation	HP:0030713	8.94375	4293	4	240	2	0.22362	0.0173257
Early onset of sexual maturation	HP:0100000	8.94375	4293	2	240	1	0.11181	0.108697
Abnormal circulating glutamine concentration	HP:0010903	8.94375	4293	2	240	1	0.11181	0.108697
Hyperthreoninemia	HP:0003354	8.94375	4293	2	240	1	0.11181	0.108697
Elevated gamma-glutamyltransferase activity	HP:0030948	8.94375	4293	2	240	1	0.11181	0.108697
Midline facial capillary hemangioma	HP:0007601	8.94375	4293	2	240	1	0.11181	0.108697
Excessive bleeding from superficial cuts	HP:0030138	8.94375	4293	2	240	1	0.11181	0.108697
Deep longitudinal plantar crease	HP:0004681	8.94375	4293	2	240	1	0.11181	0.108697
Reticular pigmentary degeneration	HP:0007937	8.94375	4293	2	240	1	0.11181	0.108697
High-frequency sensorineural hearing impairment	HP:0001757	8.94375	4293	2	240	1	0.11181	0.108697
Limited interphalangeal movement	HP:0006064	8.94375	4293	2	240	1	0.11181	0.108697
Partial duplication of the distal phalanx of the 2nd finger	HP:0009951	8.94375	4293	2	240	1	0.11181	0.108697
Partial duplication of the distal phalanx of the 3rd finger	HP:0009968	8.94375	4293	2	240	1	0.11181	0.108697
Absent first metatarsal	HP:0010104	8.94375	4293	2	240	1	0.11181	0.108697
Abnormal iris vasculature	HP:0007905	8.94375	4293	2	240	1	0.11181	0.108697
Irregular metacarpals	HP:0006160	8.94375	4293	2	240	1	0.11181	0.108697
Short distal phalanx of hallux	HP:0010103	8.94375	4293	2	240	1	0.11181	0.108697
Stereotypical body rocking	HP:0012172	8.94375	4293	2	240	1	0.11181	0.108697
Hemorrhagic ovarian cyst	HP:0012886	8.94375	4293	2	240	1	0.11181	0.108697
Partial atrioventricular canal defect	HP:0011577	8.94375	4293	4	240	2	0.22362	0.0173257
Coronary sinus enlargement	HP:0031298	8.94375	4293	4	240	2	0.22362	0.0173257
Primum atrial septal defect	HP:0010445	8.94375	4293	2	240	1	0.11181	0.108697
Continuous spike and waves during slow sleep	HP:0031491	8.94375	4293	2	240	1	0.11181	0.108697
Supernumerary metacarpal bones	HP:0005917	8.94375	4293	2	240	1	0.11181	0.108697
Cleft at the superior portion of the pinna	HP:0008537	8.94375	4293	2	240	1	0.11181	0.108697
Hypoplastic superior helix	HP:0008559	8.94375	4293	4	240	2	0.22362	0.0173257
Abnormality of the parathyroid gland	HP:0000828	8.94375	4293	2	240	1	0.11181	0.108697
Cellular metachromasia	HP:0003653	8.94375	4293	2	240	1	0.11181	0.108697
Pseudoepiphyses	HP:0010584	8.94375	4293	2	240	1	0.11181	0.108697
Cutis gyrata of scalp	HP:0010541	8.94375	4293	2	240	1	0.11181	0.108697
Absent scrotum	HP:0008707	8.94375	4293	2	240	1	0.11181	0.108697
Craniopharyngioma	HP:0030062	8.94375	4293	2	240	1	0.11181	0.108697
Fetal pyelectasis	HP:0010945	8.94375	4293	2	240	1	0.11181	0.108697
Profuse pigmented skin lesions	HP:0005587	8.94375	4293	2	240	1	0.11181	0.108697
Absent pigmentation of the ventral chest	HP:0007542	8.94375	4293	2	240	1	0.11181	0.108697
Piebaldism	HP:0007544	8.94375	4293	2	240	1	0.11181	0.108697
Palmar hyperkeratosis	HP:0010765	8.94375	4293	4	240	2	0.22362	0.0173257
Osteomyelitis leading to amputation due to slow healing fractures	HP:0005010	8.94375	4293	2	240	1	0.11181	0.108697
Metaphyseal striations	HP:0031367	8.94375	4293	2	240	1	0.11181	0.108697
Abnormal iris pigmentation	HP:0008034	8.94375	4293	2	240	1	0.11181	0.108697
Abnormality of buccal mucosa	HP:3000019	8.94375	4293	2	240	1	0.11181	0.108697
Nephroblastomatosis	HP:0008643	8.94375	4293	2	240	1	0.11181	0.108697
Lumbosacral meningocele	HP:0200133	8.94375	4293	2	240	1	0.11181	0.108697
Nephrogenic rest	HP:0100880	8.94375	4293	2	240	1	0.11181	0.108697
Postural hypotension with compensatory tachycardia	HP:0005307	8.94375	4293	2	240	1	0.11181	0.108697
Decreased numbers of nephrons	HP:0005563	8.94375	4293	2	240	1	0.11181	0.108697
Impaired renal concentrating ability	HP:0004727	8.94375	4293	2	240	1	0.11181	0.108697
Warfarin-induced skin necrosis	HP:0001038	8.94375	4293	2	240	1	0.11181	0.108697
Unilateral renal dysplasia	HP:0008718	8.94375	4293	2	240	1	0.11181	0.108697
Abnormality of the vasculature	HP:0002597	8.94375	4293	2	240	1	0.11181	0.108697
Abnormal large intestine morphology	HP:0002250	8.94375	4293	2	240	1	0.11181	0.108697
Stippled chondral calcification	HP:0002764	8.94375	4293	2	240	1	0.11181	0.108697
Unilateral narrow palpebral fissure	HP:0007946	8.94375	4293	2	240	1	0.11181	0.108697
Genetic anticipation with paternal anticipation bias	HP:0003744	8.94375	4293	2	240	1	0.11181	0.108697
2-3 toe cutaneous syndactyly	HP:0005709	8.94375	4293	2	240	1	0.11181	0.108697
Hyperapobetalipoproteinemia	HP:0008158	8.94375	4293	2	240	1	0.11181	0.108697
Slanting of the palpebral fissure	HP:0200006	8.94375	4293	2	240	1	0.11181	0.108697
Quadriceps muscle atrophy	HP:0009050	8.94375	4293	2	240	1	0.11181	0.108697
Anoperineal fistula	HP:0005218	8.94375	4293	2	240	1	0.11181	0.108697
Flared nostrils	HP:0000454	7.155	4293	5	240	2	0.279525	0.0278183
Motor tics	HP:0100034	7.155	4293	5	240	2	0.279525	0.0278183
U-Shaped upper lip vermilion	HP:0010806	7.155	4293	5	240	2	0.279525	0.0278183
Absent vas deferens	HP:0012873	7.155	4293	5	240	2	0.279525	0.0278183
Perimembranous ventricular septal defect	HP:0011682	7.155	4293	5	240	2	0.279525	0.0278183
Remnants of the hyaloid vascular system	HP:0007968	7.155	4293	5	240	2	0.279525	0.0278183
Lens subluxation	HP:0001132	7.155	4293	5	240	2	0.279525	0.0278183
Chorioretinal degeneration	HP:0200065	7.155	4293	5	240	2	0.279525	0.0278183
Congenital posterior urethral valve	HP:0010957	7.155	4293	5	240	2	0.279525	0.0278183
Cerebral white matter hypoplasia	HP:0012430	7.155	4293	5	240	2	0.279525	0.0278183
Perivascular spaces	HP:0012520	7.155	4293	5	240	2	0.279525	0.0278183
Increased fibular diameter	HP:0012107	7.155	4293	5	240	2	0.279525	0.0278183
Oxycephaly	HP:0000263	7.155	4293	5	240	2	0.279525	0.0278183
Childhood-onset truncal obesity	HP:0008915	7.155	4293	5	240	2	0.279525	0.0278183
Increased adipose tissue	HP:0009126	7.155	4293	5	240	2	0.279525	0.0278183
Bacterial endocarditis	HP:0006689	7.155	4293	5	240	2	0.279525	0.0278183
Heterotaxy	HP:0030853	7.155	4293	5	240	2	0.279525	0.0278183
Short 2nd metacarpal	HP:0010038	5.9625	4293	3	240	1	0.167715	0.158548
Triangular shaped middle phalanx of the 2nd finger	HP:0009575	5.9625	4293	3	240	1	0.167715	0.158548
Type A2 brachydactyly	HP:0009372	5.9625	4293	3	240	1	0.167715	0.158548
Medially deviated second toe	HP:0008096	5.9625	4293	3	240	1	0.167715	0.158548
Triangular shaped middle phalanx of the 5th finger	HP:0009182	5.9625	4293	3	240	1	0.167715	0.158548
Perineal hypospadias	HP:0000051	5.9625	4293	6	240	2	0.33543	0.0402062
Depigmentation/hyperpigmentation of skin	HP:0007483	5.9625	4293	3	240	1	0.167715	0.158548
Periventricular white matter hyperdensities	HP:0030891	5.9625	4293	3	240	1	0.167715	0.158548
Cardiogenic shock	HP:0030149	5.9625	4293	3	240	1	0.167715	0.158548
Pollakisuria	HP:0100515	5.9625	4293	6	240	2	0.33543	0.0402062
Limited knee flexion/extension	HP:0005085	5.9625	4293	3	240	1	0.167715	0.158548
Widely-spaced maxillary central incisors	HP:0001566	5.9625	4293	6	240	2	0.33543	0.0402062
Equinovarus deformity	HP:0008110	5.9625	4293	6	240	2	0.33543	0.0402062
Osteochondritis Dissecans	HP:0010886	5.9625	4293	3	240	1	0.167715	0.158548
Functional respiratory abnormality	HP:0002795	5.9625	4293	3	240	1	0.167715	0.158548
Axenfeld anomaly	HP:0001492	5.9625	4293	3	240	1	0.167715	0.158548
Abnormal eating behavior	HP:0100738	5.9625	4293	6	240	2	0.33543	0.0402062
Fused teeth	HP:0011090	5.9625	4293	3	240	1	0.167715	0.158548
Focal dystonia	HP:0004373	5.9625	4293	6	240	2	0.33543	0.0402062
Epidermal nevus	HP:0010816	5.9625	4293	3	240	1	0.167715	0.158548
Abnormality of canine	HP:0011078	5.9625	4293	3	240	1	0.167715	0.158548
Hepatic encephalopathy	HP:0002480	5.9625	4293	6	240	2	0.33543	0.0402062
Abnormal eye physiology	HP:0012373	5.9625	4293	6	240	2	0.33543	0.0402062
Abnormality of nervous system physiology	HP:0012638	5.9625	4293	6	240	2	0.33543	0.0402062
Cerebral artery atherosclerosis	HP:0007201	5.9625	4293	6	240	2	0.33543	0.0402062
Myocardial steatosis	HP:0006693	5.9625	4293	6	240	2	0.33543	0.0402062
Absent facial hair	HP:0002550	5.9625	4293	3	240	1	0.167715	0.158548
Blind vagina	HP:0040314	5.9625	4293	3	240	1	0.167715	0.158548
Hypertropia	HP:0025586	5.9625	4293	3	240	1	0.167715	0.158548
Mandibular osteomyelitis	HP:0007626	5.9625	4293	3	240	1	0.167715	0.158548
3-4 finger cutaneous syndactyly	HP:0011939	5.9625	4293	3	240	1	0.167715	0.158548
Age-dependent penetrance	HP:0003831	5.9625	4293	3	240	1	0.167715	0.158548
Superficial thrombophlebitis	HP:0002638	5.9625	4293	3	240	1	0.167715	0.158548
Long ear	HP:0400004	5.9625	4293	3	240	1	0.167715	0.158548
Abnormality of fontanelles	HP:0011328	5.9625	4293	3	240	1	0.167715	0.158548
HbH hemoglobin	HP:0011903	5.9625	4293	3	240	1	0.167715	0.158548
Facial telangiectasia	HP:0007380	5.9625	4293	6	240	2	0.33543	0.0402062
Atypical pulmonary carcinoid tumor	HP:0030446	5.9625	4293	3	240	1	0.167715	0.158548
Bilateral renal hypoplasia	HP:0012584	5.9625	4293	3	240	1	0.167715	0.158548
Impairment of activities of daily living	HP:0031058	5.9625	4293	3	240	1	0.167715	0.158548
Bowel urgency	HP:0012701	5.9625	4293	3	240	1	0.167715	0.158548
Lack of bowel sounds	HP:0030145	5.9625	4293	3	240	1	0.167715	0.158548
Dermatological manifestations of systemic disorders	HP:0001005	5.9625	4293	3	240	1	0.167715	0.158548
Peripheral edema	HP:0012398	5.9625	4293	3	240	1	0.167715	0.158548
Delayed pubic bone ossification	HP:0008788	5.9625	4293	3	240	1	0.167715	0.158548
Bilateral conductive hearing impairment	HP:0008513	5.9625	4293	3	240	1	0.167715	0.158548
Midclavicular hypoplasia	HP:0006608	5.9625	4293	3	240	1	0.167715	0.158548
Intracranial cystic lesion	HP:0010576	5.9625	4293	3	240	1	0.167715	0.158548
Abnormal hypothalamus morphology	HP:0012286	5.9625	4293	3	240	1	0.167715	0.158548
Patchy osteosclerosis	HP:0005686	5.9625	4293	3	240	1	0.167715	0.158548
Downbeat nystagmus	HP:0010545	5.9625	4293	3	240	1	0.167715	0.158548
Broad jaw	HP:0012802	5.9625	4293	6	240	2	0.33543	0.0402062
Wide penis	HP:0030265	5.9625	4293	3	240	1	0.167715	0.158548
Exercise-induced muscle stiffness	HP:0008967	5.9625	4293	3	240	1	0.167715	0.158548
Membranous nephropathy	HP:0012578	5.9625	4293	3	240	1	0.167715	0.158548
Focal T2 hypointense brainstem lesion	HP:0012749	5.9625	4293	3	240	1	0.167715	0.158548
Neuroma	HP:0030430	5.9625	4293	3	240	1	0.167715	0.158548
Retinal cavernous angioma	HP:0011513	5.9625	4293	3	240	1	0.167715	0.158548
Multiple impacted teeth	HP:0001571	5.9625	4293	3	240	1	0.167715	0.158548
Absent external genitalia	HP:0000042	5.9625	4293	3	240	1	0.167715	0.158548
Abnormality of the sella turcica	HP:0002679	5.9625	4293	3	240	1	0.167715	0.158548
Blepharochalasis	HP:0010749	5.9625	4293	3	240	1	0.167715	0.158548
Limited neck range of motion	HP:0000466	5.9625	4293	3	240	1	0.167715	0.158548
Long metacarpals	HP:0010493	5.9625	4293	3	240	1	0.167715	0.158548
Normal pressure hydrocephalus	HP:0002343	5.9625	4293	3	240	1	0.167715	0.158548
Ivory epiphyses of the phalanges of the hand	HP:0010234	5.9625	4293	3	240	1	0.167715	0.158548
Crumpled ear	HP:0009901	5.9625	4293	3	240	1	0.167715	0.158548
EMG: myotonic runs	HP:0003730	5.9625	4293	3	240	1	0.167715	0.158548
Multiple joint dislocation	HP:0012095	5.9625	4293	3	240	1	0.167715	0.158548
Pulmonary valve atresia	HP:0010882	5.9625	4293	3	240	1	0.167715	0.158548
Irregular acetabular roof	HP:0008833	5.9625	4293	3	240	1	0.167715	0.158548
Metaphyseal cupping of metacarpals	HP:0006028	5.9625	4293	3	240	1	0.167715	0.158548
Histiocytoma	HP:0012315	5.9625	4293	3	240	1	0.167715	0.158548
Posterior Y-sutural cataract	HP:0008031	5.9625	4293	3	240	1	0.167715	0.158548
Sutural cataract	HP:0010695	5.9625	4293	3	240	1	0.167715	0.158548
Congenital hypoplastic anemia	HP:0004810	5.9625	4293	3	240	1	0.167715	0.158548
Methemoglobinemia	HP:0012119	5.9625	4293	3	240	1	0.167715	0.158548
Tuberous xanthoma	HP:0031290	5.9625	4293	3	240	1	0.167715	0.158548
Aplasia cutis congenita over the scalp vertex	HP:0004471	5.9625	4293	3	240	1	0.167715	0.158548
Asthenia	HP:0025406	5.9625	4293	3	240	1	0.167715	0.158548
Eyelid myoclonus	HP:0025097	5.9625	4293	3	240	1	0.167715	0.158548
Microtia, first degree	HP:0011266	5.9625	4293	3	240	1	0.167715	0.158548
Widely spaced toes	HP:0008094	5.9625	4293	3	240	1	0.167715	0.158548
Distal shortening of limbs	HP:0006402	5.9625	4293	3	240	1	0.167715	0.158548
Pulp stones	HP:0003771	5.9625	4293	3	240	1	0.167715	0.158548
Episodic hemolytic anemia	HP:0004802	5.9625	4293	3	240	1	0.167715	0.158548
Limited elbow flexion/extension	HP:0005060	5.9625	4293	3	240	1	0.167715	0.158548
Aplasia/Hypoplastia of the eccrine sweat glands	HP:0007592	5.9625	4293	3	240	1	0.167715	0.158548
Hypohidrotic ectodermal dysplasia	HP:0007607	5.9625	4293	3	240	1	0.167715	0.158548
Myxomatous mitral valve degeneration	HP:0004764	5.9625	4293	3	240	1	0.167715	0.158548
Atrial arrhythmia	HP:0001692	5.9625	4293	3	240	1	0.167715	0.158548
Hyperlysinemia	HP:0002161	5.9625	4293	3	240	1	0.167715	0.158548
Increased urinary glycerol	HP:0040301	5.9625	4293	3	240	1	0.167715	0.158548
Delayed social development	HP:0012434	5.9625	4293	3	240	1	0.167715	0.158548
Honeycomb palmoplantar keratoderma	HP:0007465	5.9625	4293	3	240	1	0.167715	0.158548
Amniotic constriction ring	HP:0009775	5.9625	4293	6	240	2	0.33543	0.0402062
Abnormal bone ossification	HP:0011849	5.9625	4293	3	240	1	0.167715	0.158548
Prominent crus of helix	HP:0009899	5.9625	4293	3	240	1	0.167715	0.158548
Osteochondroma	HP:0030431	5.9625	4293	3	240	1	0.167715	0.158548
Enlarged cerebellum	HP:0012081	5.9625	4293	3	240	1	0.167715	0.158548
Foot osteomyelitis	HP:0001886	5.9625	4293	3	240	1	0.167715	0.158548
Tortuosity of conjunctival vessels	HP:0000503	5.9625	4293	3	240	1	0.167715	0.158548
Absence of renal corticomedullary differentiation	HP:0005564	5.9625	4293	3	240	1	0.167715	0.158548
Microphakia	HP:0012376	5.9625	4293	3	240	1	0.167715	0.158548
Impairment of galactose metabolism	HP:0004915	5.9625	4293	3	240	1	0.167715	0.158548
Transient hyperphenylalaninemia	HP:0008297	5.9625	4293	3	240	1	0.167715	0.158548
EEG with focal sharp waves	HP:0011196	5.9625	4293	3	240	1	0.167715	0.158548
Hypoplasia of the premaxilla	HP:0010650	5.9625	4293	3	240	1	0.167715	0.158548
Y-shaped metacarpals	HP:0006042	5.9625	4293	3	240	1	0.167715	0.158548
Radial club hand	HP:0004059	5.9625	4293	3	240	1	0.167715	0.158548
Radial head subluxation	HP:0003048	5.9625	4293	3	240	1	0.167715	0.158548
Visual fixation instability	HP:0025405	5.9625	4293	3	240	1	0.167715	0.158548
Hypoplastic helices	HP:0008589	5.9625	4293	3	240	1	0.167715	0.158548
Skin-picking	HP:0012166	5.9625	4293	3	240	1	0.167715	0.158548
Abnormal skull morphology	HP:0000929	5.9625	4293	3	240	1	0.167715	0.158548
Sclerodactyly	HP:0011838	5.9625	4293	3	240	1	0.167715	0.158548
Presenile cataracts	HP:0007819	5.9625	4293	3	240	1	0.167715	0.158548
Stenosis of the medullary cavity of the long bones	HP:0100254	5.9625	4293	3	240	1	0.167715	0.158548
Intrahepatic biliary dysgenesis	HP:0001401	5.9625	4293	3	240	1	0.167715	0.158548
Prominent eyelashes	HP:0011231	5.9625	4293	3	240	1	0.167715	0.158548
Upper eyelid edema	HP:0012724	5.9625	4293	3	240	1	0.167715	0.158548
Internally nucleated skeletal muscle fibers	HP:0031237	5.9625	4293	3	240	1	0.167715	0.158548
Short 2nd finger	HP:0009536	5.11071	4293	7	240	2	0.391335	0.0542463
Exercise-induced myoglobinuria	HP:0008305	5.11071	4293	7	240	2	0.391335	0.0542463
Macrodontia of permanent maxillary central incisor	HP:0000675	5.11071	4293	7	240	2	0.391335	0.0542463
Macrodactyly	HP:0004099	5.11071	4293	7	240	2	0.391335	0.0542463
Abnormal internal carotid artery morphology	HP:3000062	5.11071	4293	7	240	2	0.391335	0.0542463
Coronary artery aneurysm	HP:0030882	5.11071	4293	7	240	2	0.391335	0.0542463
Progressive inability to walk	HP:0002505	5.11071	4293	7	240	2	0.391335	0.0542463
Cutaneous syndactyly of toes	HP:0010621	5.11071	4293	7	240	2	0.391335	0.0542463
Multiple epiphyseal dysplasia	HP:0002654	5.11071	4293	7	240	2	0.391335	0.0542463
Myeloid leukemia	HP:0012324	5.11071	4293	7	240	2	0.391335	0.0542463
White eyebrow	HP:0002226	5.11071	4293	7	240	2	0.391335	0.0542463
Olivopontocerebellar atrophy	HP:0002542	5.11071	4293	7	240	2	0.391335	0.0542463
Hydrometrocolpos	HP:0030010	4.47187	4293	4	240	1	0.22362	0.205623
Asymmetry of the thorax	HP:0001555	4.47187	4293	8	240	2	0.44724	0.0697168
Recurrent upper and lower respiratory tract infections	HP:0200117	4.47187	4293	8	240	2	0.44724	0.0697168
Small forehead	HP:0000350	4.47187	4293	4	240	1	0.22362	0.205623
Retinoschisis	HP:0030502	4.47187	4293	4	240	1	0.22362	0.205623
Hamartoma	HP:0010566	4.47187	4293	8	240	2	0.44724	0.0697168
Agenesis of maxillary lateral incisor	HP:0000690	4.47187	4293	4	240	1	0.22362	0.205623
Facial grimacing	HP:0000273	4.47187	4293	8	240	2	0.44724	0.0697168
Sirenomelia	HP:0010497	4.47187	4293	8	240	2	0.44724	0.0697168
Hemifacial seizures	HP:0007332	4.47187	4293	4	240	1	0.22362	0.205623
Increased serum serotonin	HP:0003144	4.47187	4293	8	240	2	0.44724	0.0697168
Prominent interphalangeal joints	HP:0006237	4.47187	4293	4	240	1	0.22362	0.205623
Short distal phalanx of the 5th finger	HP:0004227	4.47187	4293	4	240	1	0.22362	0.205623
Vascular skin abnormality	HP:0011276	4.47187	4293	8	240	2	0.44724	0.0697168
Elevated urinary catecholamines	HP:0011976	4.47187	4293	8	240	2	0.44724	0.0697168
Abnormality of the penis	HP:0000036	4.47187	4293	8	240	2	0.44724	0.0697168
Varicocele	HP:0012871	4.47187	4293	4	240	1	0.22362	0.205623
Bronchogenic cyst	HP:0100730	4.47187	4293	4	240	1	0.22362	0.205623
Facial edema	HP:0000282	4.47187	4293	8	240	2	0.44724	0.0697168
Reactive hypoglycemia	HP:0012051	4.47187	4293	4	240	1	0.22362	0.205623
Chills	HP:0025143	4.47187	4293	8	240	2	0.44724	0.0697168
Increased cellular sensitivity to UV light	HP:0003224	4.47187	4293	4	240	1	0.22362	0.205623
Alternating esotropia	HP:0001137	4.47187	4293	4	240	1	0.22362	0.205623
Desmoid tumors	HP:0100245	4.47187	4293	4	240	1	0.22362	0.205623
Difficulty in tongue movements	HP:0000183	4.47187	4293	8	240	2	0.44724	0.0697168
Premature arteriosclerosis	HP:0005177	4.47187	4293	8	240	2	0.44724	0.0697168
Absent pubic hair	HP:0002555	4.47187	4293	4	240	1	0.22362	0.205623
Short iliac bones	HP:0100866	4.47187	4293	4	240	1	0.22362	0.205623
Absent nipple	HP:0002561	4.47187	4293	8	240	2	0.44724	0.0697168
Adermatoglyphia	HP:0007455	4.47187	4293	4	240	1	0.22362	0.205623
Absent tibia	HP:0009556	4.47187	4293	4	240	1	0.22362	0.205623
Absent frontal sinuses	HP:0002688	4.47187	4293	8	240	2	0.44724	0.0697168
Reduced alpha/beta synthesis ratio	HP:0011907	4.47187	4293	4	240	1	0.22362	0.205623
Zollinger-Ellison syndrome	HP:0002044	4.47187	4293	8	240	2	0.44724	0.0697168
Chromosome breakage	HP:0040012	4.47187	4293	4	240	1	0.22362	0.205623
Tongue thrusting	HP:0100703	4.47187	4293	4	240	1	0.22362	0.205623
Abnormal visual field test	HP:0030588	4.47187	4293	4	240	1	0.22362	0.205623
Pituitary prolactin cell adenoma	HP:0006767	4.47187	4293	8	240	2	0.44724	0.0697168
Pituitary growth hormone cell adenoma	HP:0011760	4.47187	4293	8	240	2	0.44724	0.0697168
Choroidal hemangioma	HP:0007872	4.47187	4293	4	240	1	0.22362	0.205623
Intellectual disability, borderline	HP:0006889	4.47187	4293	8	240	2	0.44724	0.0697168
Bifid ureter	HP:0030037	4.47187	4293	4	240	1	0.22362	0.205623
Thickened superior cerebellar peduncle	HP:0002404	4.47187	4293	4	240	1	0.22362	0.205623
Stapes ankylosis	HP:0000381	4.47187	4293	4	240	1	0.22362	0.205623
Meconium ileus	HP:0004401	4.47187	4293	4	240	1	0.22362	0.205623
Square pelvis bone	HP:0003278	4.47187	4293	4	240	1	0.22362	0.205623
Peripheral dysmyelination	HP:0003469	4.47187	4293	4	240	1	0.22362	0.205623
Slender nose	HP:0000417	4.47187	4293	4	240	1	0.22362	0.205623
Focal tonic seizures	HP:0011167	4.47187	4293	4	240	1	0.22362	0.205623
EEG with focal spikes	HP:0011193	4.47187	4293	4	240	1	0.22362	0.205623
Asymmetry of the ears	HP:0010722	4.47187	4293	4	240	1	0.22362	0.205623
Malrotation of colon	HP:0004785	4.47187	4293	4	240	1	0.22362	0.205623
Fibrosarcoma	HP:0100244	4.47187	4293	4	240	1	0.22362	0.205623
Irregular capital femoral epiphysis	HP:0005041	4.47187	4293	4	240	1	0.22362	0.205623
Pulmonary lymphangiectasia	HP:0006521	4.47187	4293	4	240	1	0.22362	0.205623
Cervical C2/C3 vertebral fusion	HP:0004602	4.47187	4293	4	240	1	0.22362	0.205623
Frontal release signs	HP:0000743	4.47187	4293	4	240	1	0.22362	0.205623
Hepatic necrosis	HP:0002605	4.47187	4293	4	240	1	0.22362	0.205623
Abnormal temper tantrums	HP:0025160	4.47187	4293	4	240	1	0.22362	0.205623
Gelastic seizures	HP:0010821	4.47187	4293	4	240	1	0.22362	0.205623
Advanced tarsal ossification	HP:0008108	4.47187	4293	4	240	1	0.22362	0.205623
Periportal fibrosis	HP:0001405	4.47187	4293	4	240	1	0.22362	0.205623
Abnormality of the spinal cord	HP:0002143	4.47187	4293	4	240	1	0.22362	0.205623
Decreased corneal thickness	HP:0100689	4.47187	4293	4	240	1	0.22362	0.205623
Postnatal macrocephaly	HP:0005490	4.47187	4293	4	240	1	0.22362	0.205623
Stereotypical hand wringing	HP:0012171	4.47187	4293	4	240	1	0.22362	0.205623
Absent nares	HP:0100596	4.47187	4293	4	240	1	0.22362	0.205623
White eyelashes	HP:0002227	4.47187	4293	8	240	2	0.44724	0.0697168
Food intolerance	HP:0012537	4.47187	4293	4	240	1	0.22362	0.205623
Hypertyrosinemia	HP:0003231	4.47187	4293	4	240	1	0.22362	0.205623
Acute hyperammonemia	HP:0008281	4.47187	4293	4	240	1	0.22362	0.205623
Hypergalactosemia	HP:0012024	4.47187	4293	4	240	1	0.22362	0.205623
Neoplasm of the central nervous system	HP:0100006	4.47187	4293	4	240	1	0.22362	0.205623
Metatarsal synostosis	HP:0001440	4.47187	4293	4	240	1	0.22362	0.205623
Hallux varus	HP:0008080	4.47187	4293	4	240	1	0.22362	0.205623
Overfolding of the superior helices	HP:0004453	4.47187	4293	4	240	1	0.22362	0.205623
Mesomelic leg shortening	HP:0004987	4.47187	4293	4	240	1	0.22362	0.205623
Inertia	HP:0030216	4.47187	4293	4	240	1	0.22362	0.205623
Abnormal bone structure	HP:0003330	4.47187	4293	4	240	1	0.22362	0.205623
Increased serum testosterone level	HP:0030088	4.47187	4293	4	240	1	0.22362	0.205623
EEG with centrotemporal focal spike waves	HP:0012557	4.47187	4293	4	240	1	0.22362	0.205623
Glioma	HP:0009733	4.47187	4293	4	240	1	0.22362	0.205623
3-4 finger syndactyly	HP:0006097	4.47187	4293	4	240	1	0.22362	0.205623
Abnormal involuntary eye movements	HP:0012547	4.47187	4293	4	240	1	0.22362	0.205623
Ovoid thoracolumbar vertebrae	HP:0003309	4.47187	4293	4	240	1	0.22362	0.205623
Oculogyric crisis	HP:0010553	4.47187	4293	8	240	2	0.44724	0.0697168
Ocular anterior segment dysgenesis	HP:0007700	4.47187	4293	4	240	1	0.22362	0.205623
Low levels of vitamin B1	HP:0100503	4.47187	4293	4	240	1	0.22362	0.205623
Mastocytosis	HP:0100495	4.47187	4293	4	240	1	0.22362	0.205623
Chronic myelomonocytic leukemia	HP:0012325	4.47187	4293	4	240	1	0.22362	0.205623
Pelvic girdle muscle atrophy	HP:0008988	4.47187	4293	4	240	1	0.22362	0.205623
Nonprogressive cerebellar ataxia	HP:0002470	3.975	4293	9	240	2	0.503145	0.0864154
Abnormality of the shoulder	HP:0003043	3.975	4293	9	240	2	0.503145	0.0864154
Potter facies	HP:0002009	3.975	4293	9	240	2	0.503145	0.0864154
Lymphangioma	HP:0100764	3.975	4293	9	240	2	0.503145	0.0864154
Increased red cell osmotic fragility	HP:0005502	3.975	4293	9	240	2	0.503145	0.0864154
Foot oligodactyly	HP:0001849	3.975	4293	9	240	2	0.503145	0.0864154
Precocious atherosclerosis	HP:0004416	3.975	4293	9	240	2	0.503145	0.0864154
Decreased LDL cholesterol concentration	HP:0003563	3.975	4293	9	240	2	0.503145	0.0864154
Aortic atherosclerotic lesion	HP:0012397	3.975	4293	9	240	2	0.503145	0.0864154
Tendon xanthomatosis	HP:0010874	3.975	4293	9	240	2	0.503145	0.0864154
Hyperconvex nail	HP:0001795	3.975	4293	9	240	2	0.503145	0.0864154
Gonadotropin deficiency	HP:0008213	3.975	4293	9	240	2	0.503145	0.0864154
Common atrium	HP:0011565	3.975	4293	9	240	2	0.503145	0.0864154
Urethral stricture	HP:0012227	3.5775	4293	10	240	2	0.55905	0.104158
Deviation of finger	HP:0004097	3.5775	4293	5	240	1	0.279525	0.250074
Abnormality of the radius	HP:0002818	3.5775	4293	5	240	1	0.279525	0.250074
Acromesomelia	HP:0003086	3.5775	4293	5	240	1	0.279525	0.250074
Aplasia/Hypoplasia of the middle phalanx of the 2nd finger	HP:0009568	3.5775	4293	5	240	1	0.279525	0.250074
Aplasia/Hypoplasia of the middle phalanx of the 5th finger	HP:0009161	3.5775	4293	5	240	1	0.279525	0.250074
Ulnar deviation of the 2nd finger	HP:0009464	3.5775	4293	5	240	1	0.279525	0.250074
Coronary artery stenosis	HP:0005145	3.5775	4293	5	240	1	0.279525	0.250074
Inflammatory abnormality of the skin	HP:0011123	3.5775	4293	5	240	1	0.279525	0.250074
Wide nasal base	HP:0012810	3.5775	4293	10	240	2	0.55905	0.104158
Cyst of the ductus choledochus	HP:0100890	3.5775	4293	5	240	1	0.279525	0.250074
Thoracolumbar scoliosis	HP:0002944	3.5775	4293	10	240	2	0.55905	0.104158
Hamstring contractures	HP:0003089	3.5775	4293	5	240	1	0.279525	0.250074
Abnormal palmar dermatoglyphics	HP:0001018	3.5775	4293	5	240	1	0.279525	0.250074
Aplasia/Hypoplasia of the distal phalanx of the 5th toe	HP:0100371	3.5775	4293	10	240	2	0.55905	0.104158
Aplasia/Hypoplasia of the distal phalanx of the 5th finger	HP:0009239	3.5775	4293	10	240	2	0.55905	0.104158
Hypoplastic fifth fingernail	HP:0008398	3.5775	4293	10	240	2	0.55905	0.104158
Anterior rib cupping	HP:0000907	3.5775	4293	10	240	2	0.55905	0.104158
Abnormality of the knee	HP:0002815	3.5775	4293	10	240	2	0.55905	0.104158
Microphallus	HP:0030260	3.5775	4293	10	240	2	0.55905	0.104158
Lumbar scoliosis	HP:0004626	3.5775	4293	5	240	1	0.279525	0.250074
Hyperoxaluria	HP:0003159	3.5775	4293	5	240	1	0.279525	0.250074
Subcutaneous lipoma	HP:0001031	3.5775	4293	10	240	2	0.55905	0.104158
Retinal hamartoma	HP:0009594	3.5775	4293	5	240	1	0.279525	0.250074
Progressive macrocephaly	HP:0004481	3.5775	4293	5	240	1	0.279525	0.250074
Conjunctival hamartoma	HP:0100780	3.5775	4293	10	240	2	0.55905	0.104158
Dermoid cyst	HP:0025247	3.5775	4293	5	240	1	0.279525	0.250074
Spherocytosis	HP:0004444	3.5775	4293	5	240	1	0.279525	0.250074
Unerupted tooth	HP:0000706	3.5775	4293	5	240	1	0.279525	0.250074
Esophageal carcinoma	HP:0011459	3.5775	4293	10	240	2	0.55905	0.104158
Pilomatrixoma	HP:0030434	3.5775	4293	5	240	1	0.279525	0.250074
Abnormality of the corticospinal tract	HP:0002492	3.5775	4293	5	240	1	0.279525	0.250074
Increased B cell count	HP:0005404	3.5775	4293	5	240	1	0.279525	0.250074
Elevated proportion of CD4-negative, CD8-negative, alpha-beta regulatory T cells	HP:0002851	3.5775	4293	5	240	1	0.279525	0.250074
Gastritis	HP:0005263	3.5775	4293	10	240	2	0.55905	0.104158
Abnormal proportion of CD4 T cells	HP:0031392	3.5775	4293	5	240	1	0.279525	0.250074
Abnormal vitamin B12 level	HP:0040126	3.5775	4293	5	240	1	0.279525	0.250074
Axonal regeneration	HP:0003450	3.5775	4293	5	240	1	0.279525	0.250074
Testicular seminoma	HP:0100617	3.5775	4293	5	240	1	0.279525	0.250074
Supernumerary maxillary incisor	HP:0006332	3.5775	4293	5	240	1	0.279525	0.250074
Vertebral hypoplasia	HP:0008417	3.5775	4293	5	240	1	0.279525	0.250074
Protein-losing enteropathy	HP:0002243	3.5775	4293	10	240	2	0.55905	0.104158
Enlarged epiphyses	HP:0010580	3.5775	4293	5	240	1	0.279525	0.250074
Night sweats	HP:0030166	3.5775	4293	10	240	2	0.55905	0.104158
Fractures of the long bones	HP:0003084	3.5775	4293	5	240	1	0.279525	0.250074
Posterior rib cupping	HP:0000922	3.5775	4293	5	240	1	0.279525	0.250074
Uplifted earlobe	HP:0009909	3.5775	4293	5	240	1	0.279525	0.250074
Sudden loss of visual acuity	HP:0001117	3.5775	4293	5	240	1	0.279525	0.250074
Loss of Purkinje cells in the cerebellar vermis	HP:0007001	3.5775	4293	5	240	1	0.279525	0.250074
Teratoma	HP:0009792	3.5775	4293	5	240	1	0.279525	0.250074
Choriocarcinoma	HP:0100768	3.5775	4293	5	240	1	0.279525	0.250074
Miosis	HP:0000616	3.5775	4293	10	240	2	0.55905	0.104158
Galactorrhea	HP:0100829	3.5775	4293	5	240	1	0.279525	0.250074
Cranial nerve VI palsy	HP:0006897	3.5775	4293	5	240	1	0.279525	0.250074
Moderately short stature	HP:0008848	3.5775	4293	5	240	1	0.279525	0.250074
Ureteral stenosis	HP:0000071	3.5775	4293	10	240	2	0.55905	0.104158
Carcinoid tumor	HP:0100570	3.5775	4293	5	240	1	0.279525	0.250074
Pituitary corticotropic cell adenoma	HP:0008291	3.5775	4293	5	240	1	0.279525	0.250074
Insulinoma	HP:0012197	3.5775	4293	5	240	1	0.279525	0.250074
Thymoma	HP:0100522	3.5775	4293	5	240	1	0.279525	0.250074
Pituitary null cell adenoma	HP:0011761	3.5775	4293	5	240	1	0.279525	0.250074
Mottled pigmentation	HP:0001070	3.5775	4293	5	240	1	0.279525	0.250074
Barrett esophagus	HP:0100580	3.5775	4293	5	240	1	0.279525	0.250074
Dysgenesis of the hippocampus	HP:0025101	3.5775	4293	5	240	1	0.279525	0.250074
EEG with generalized epileptiform discharges	HP:0011198	3.5775	4293	5	240	1	0.279525	0.250074
Achromatopsia	HP:0011516	3.5775	4293	5	240	1	0.279525	0.250074
Otosclerosis	HP:0000362	3.5775	4293	5	240	1	0.279525	0.250074
Encephalomalacia	HP:0040197	3.5775	4293	5	240	1	0.279525	0.250074
Focal cortical dysplasia	HP:0032046	3.5775	4293	5	240	1	0.279525	0.250074
Increased laxity of ankles	HP:0006460	3.5775	4293	5	240	1	0.279525	0.250074
Lens luxation	HP:0012019	3.5775	4293	5	240	1	0.279525	0.250074
Thin clavicles	HP:0006645	3.5775	4293	5	240	1	0.279525	0.250074
Distal sensory loss of all modalities	HP:0006984	3.5775	4293	5	240	1	0.279525	0.250074
Hypomethioninemia	HP:0003658	3.5775	4293	5	240	1	0.279525	0.250074
Renal cortical microcysts	HP:0004734	3.5775	4293	5	240	1	0.279525	0.250074
Hypoplasia of the epiglottis	HP:0005349	3.5775	4293	5	240	1	0.279525	0.250074
Primary congenital glaucoma	HP:0008007	3.5775	4293	5	240	1	0.279525	0.250074
Central opacification of the cornea	HP:0011493	3.5775	4293	5	240	1	0.279525	0.250074
Decreased CSF homovanillic acid	HP:0003785	3.5775	4293	5	240	1	0.279525	0.250074
Short umbilical cord	HP:0001196	3.5775	4293	5	240	1	0.279525	0.250074
Single ventricle	HP:0001750	3.5775	4293	5	240	1	0.279525	0.250074
Aplasia of the 1st metacarpal	HP:0010035	3.5775	4293	5	240	1	0.279525	0.250074
Iridodonesis	HP:0100693	3.5775	4293	5	240	1	0.279525	0.250074
Left anterior fascicular block	HP:0011711	3.5775	4293	5	240	1	0.279525	0.250074
Delayed menarche	HP:0012569	3.5775	4293	5	240	1	0.279525	0.250074
Craniofacial disproportion	HP:0005461	3.5775	4293	5	240	1	0.279525	0.250074
Neonatal breathing dysregulation	HP:0002790	3.5775	4293	5	240	1	0.279525	0.250074
Dilatated internal auditory canal	HP:0004458	3.5775	4293	5	240	1	0.279525	0.250074
Urethral valve	HP:0010481	3.5775	4293	5	240	1	0.279525	0.250074
Proximal radio-ulnar synostosis	HP:0005037	3.5775	4293	5	240	1	0.279525	0.250074
Skull asymmetry	HP:0002678	3.5775	4293	5	240	1	0.279525	0.250074
Failure of eruption of permanent teeth	HP:0006352	3.5775	4293	5	240	1	0.279525	0.250074
Unilateral cryptorchidism	HP:0012741	3.5775	4293	5	240	1	0.279525	0.250074
Muscle abnormality related to mitochondrial dysfunction	HP:0003800	3.5775	4293	5	240	1	0.279525	0.250074
Visual acuity test abnormality	HP:0030532	3.5775	4293	5	240	1	0.279525	0.250074
Supranuclear ophthalmoplegia	HP:0000623	3.5775	4293	5	240	1	0.279525	0.250074
Vitamin B12 deficiency	HP:0100502	3.5775	4293	5	240	1	0.279525	0.250074
Pyelonephritis	HP:0012330	3.5775	4293	5	240	1	0.279525	0.250074
Long upper lip	HP:0011341	3.5775	4293	5	240	1	0.279525	0.250074
Humeroradial synostosis	HP:0003041	3.25227	4293	11	240	2	0.614955	0.122776
Posterior fossa cyst	HP:0007291	3.25227	4293	11	240	2	0.614955	0.122776
Hypoplastic fifth toenail	HP:0011937	3.25227	4293	11	240	2	0.614955	0.122776
Broad alveolar ridges	HP:0000187	3.25227	4293	11	240	2	0.614955	0.122776
Bronchospasm	HP:0025428	3.25227	4293	11	240	2	0.614955	0.122776
Spondyloepiphyseal dysplasia	HP:0002655	3.25227	4293	11	240	2	0.614955	0.122776
Flat capital femoral epiphysis	HP:0003370	3.25227	4293	11	240	2	0.614955	0.122776
Abnormal diaphysis morphology	HP:0000940	3.25227	4293	11	240	2	0.614955	0.122776
Fibroadenoma of the breast	HP:0010619	3.25227	4293	11	240	2	0.614955	0.122776
Widow's peak	HP:0000349	3.25227	4293	11	240	2	0.614955	0.122776
Hypothalamic hamartoma	HP:0002444	3.25227	4293	11	240	2	0.614955	0.122776
Corneal arcus	HP:0001084	3.25227	4293	11	240	2	0.614955	0.122776
Renal steatosis	HP:0000799	3.25227	4293	11	240	2	0.614955	0.122776
Hypersplenism	HP:0001971	3.25227	4293	11	240	2	0.614955	0.122776
Lambdoidal craniosynostosis	HP:0004443	3.25227	4293	11	240	2	0.614955	0.122776
Collectionism	HP:0030212	3.25227	4293	11	240	2	0.614955	0.122776
Abnormal vertebral segmentation and fusion	HP:0005640	3.25227	4293	11	240	2	0.614955	0.122776
Long clavicles	HP:0000890	3.25227	4293	11	240	2	0.614955	0.122776
Ulnar deviation of the hand	HP:0009487	3.25227	4293	11	240	2	0.614955	0.122776
Rieger anomaly	HP:0000558	3.25227	4293	11	240	2	0.614955	0.122776
Abnormal tricuspid valve morphology	HP:0001702	3.25227	4293	11	240	2	0.614955	0.122776
Radial deviation of the 2nd finger	HP:0009467	2.98125	4293	6	240	1	0.33543	0.292047
Chronic noninfectious lymphadenopathy	HP:0002730	2.98125	4293	12	240	2	0.67086	0.142118
Hypochromic microcytic anemia	HP:0004840	2.98125	4293	12	240	2	0.67086	0.142118
Prominent nasolabial fold	HP:0005272	2.98125	4293	6	240	1	0.33543	0.292047
Duplication of thumb phalanx	HP:0009942	2.98125	4293	6	240	1	0.33543	0.292047
Everted upper lip vermilion	HP:0010803	2.98125	4293	12	240	2	0.67086	0.142118
Abnormal head movements	HP:0002457	2.98125	4293	6	240	1	0.33543	0.292047
Abnormality of the nares	HP:0005288	2.98125	4293	6	240	1	0.33543	0.292047
Cystic renal dysplasia	HP:0000800	2.98125	4293	6	240	1	0.33543	0.292047
Delayed fine motor development	HP:0010862	2.98125	4293	6	240	1	0.33543	0.292047
Paroxysmal dystonia	HP:0002268	2.98125	4293	6	240	1	0.33543	0.292047
Band keratopathy	HP:0000585	2.98125	4293	6	240	1	0.33543	0.292047
Testicular gonadoblastoma	HP:0000030	2.98125	4293	12	240	2	0.67086	0.142118
Metopic synostosis	HP:0011330	2.98125	4293	6	240	1	0.33543	0.292047
Aplasia/Hypoplasia of the thymus	HP:0010515	2.98125	4293	6	240	1	0.33543	0.292047
Hamartomatous polyposis	HP:0004390	2.98125	4293	12	240	2	0.67086	0.142118
Long penis	HP:0000040	2.98125	4293	12	240	2	0.67086	0.142118
Limbal dermoid	HP:0001140	2.98125	4293	6	240	1	0.33543	0.292047
Central heterochromia	HP:0007818	2.98125	4293	6	240	1	0.33543	0.292047
Retrocerebellar cyst	HP:0006951	2.98125	4293	6	240	1	0.33543	0.292047
Anterior open bite	HP:0200095	2.98125	4293	6	240	1	0.33543	0.292047
Accessory oral frenulum	HP:0000191	2.98125	4293	12	240	2	0.67086	0.142118
Intestinal bleeding	HP:0002584	2.98125	4293	6	240	1	0.33543	0.292047
Specific anti-polysaccharide antibody deficiency	HP:0002848	2.98125	4293	6	240	1	0.33543	0.292047
Abnormal serum interleukin level	HP:0030782	2.98125	4293	6	240	1	0.33543	0.292047
Abnormal proportion of CD8 T cells	HP:0031393	2.98125	4293	6	240	1	0.33543	0.292047
Coombs-positive hemolytic anemia	HP:0004844	2.98125	4293	6	240	1	0.33543	0.292047
Enuresis nocturna	HP:0010677	2.98125	4293	6	240	1	0.33543	0.292047
Labial hypoplasia	HP:0000066	2.98125	4293	6	240	1	0.33543	0.292047
Calcification of falx cerebri	HP:0005462	2.98125	4293	6	240	1	0.33543	0.292047
Unconjugated hyperbilirubinemia	HP:0008282	2.98125	4293	6	240	1	0.33543	0.292047
Heinz bodies	HP:0020082	2.98125	4293	6	240	1	0.33543	0.292047
Bladder exstrophy	HP:0002836	2.98125	4293	6	240	1	0.33543	0.292047
Split foot	HP:0001839	2.98125	4293	6	240	1	0.33543	0.292047
Central diabetes insipidus	HP:0000863	2.98125	4293	6	240	1	0.33543	0.292047
Punding	HP:0030218	2.98125	4293	6	240	1	0.33543	0.292047
Typical absence seizure	HP:0011147	2.98125	4293	6	240	1	0.33543	0.292047
EEG with spike-wave complexes (2.5-3.5 Hz)	HP:0010848	2.98125	4293	6	240	1	0.33543	0.292047
Short fourth metatarsal	HP:0004689	2.98125	4293	6	240	1	0.33543	0.292047
Non-Hodgkin lymphoma	HP:0012539	2.98125	4293	6	240	1	0.33543	0.292047
Septate vagina	HP:0001153	2.98125	4293	6	240	1	0.33543	0.292047
Posterior pharyngeal cleft	HP:0006783	2.98125	4293	12	240	2	0.67086	0.142118
Amyloidosis	HP:0011034	2.98125	4293	6	240	1	0.33543	0.292047
Pontocerebellar atrophy	HP:0006879	2.98125	4293	6	240	1	0.33543	0.292047
Synovitis	HP:0100769	2.98125	4293	6	240	1	0.33543	0.292047
Neoplasm of the anterior pituitary	HP:0011750	2.98125	4293	6	240	1	0.33543	0.292047
Hashimoto thyroiditis	HP:0000872	2.98125	4293	12	240	2	0.67086	0.142118
Abnormal glycosylation	HP:0012345	2.98125	4293	6	240	1	0.33543	0.292047
Biliary tract obstruction	HP:0005230	2.98125	4293	6	240	1	0.33543	0.292047
Abnormal cranial nerve morphology	HP:0001291	2.98125	4293	12	240	2	0.67086	0.142118
Eversion of lateral third of lower eyelids	HP:0007655	2.98125	4293	6	240	1	0.33543	0.292047
Penoscrotal hypospadias	HP:0000808	2.98125	4293	6	240	1	0.33543	0.292047
Thoracolumbar kyphoscoliosis	HP:0003423	2.98125	4293	6	240	1	0.33543	0.292047
Glucagonoma	HP:0030404	2.98125	4293	6	240	1	0.33543	0.292047
Parathyroid hyperplasia	HP:0008208	2.98125	4293	6	240	1	0.33543	0.292047
Increased glucagon level	HP:0030688	2.98125	4293	6	240	1	0.33543	0.292047
Pancreatic hyperplasia	HP:0006277	2.98125	4293	6	240	1	0.33543	0.292047
Overgrowth of external genitalia	HP:0003247	2.98125	4293	6	240	1	0.33543	0.292047
Adrenocortical cytomegaly	HP:0008186	2.98125	4293	6	240	1	0.33543	0.292047
Progressive flexion contractures	HP:0005876	2.98125	4293	6	240	1	0.33543	0.292047
EEG with focal sharp slow waves	HP:0011195	2.98125	4293	6	240	1	0.33543	0.292047
Popliteal pterygium	HP:0009756	2.98125	4293	6	240	1	0.33543	0.292047
Thinning of Descemet membrane	HP:0031159	2.98125	4293	6	240	1	0.33543	0.292047
Anterior synechiae of the anterior chamber	HP:0011483	2.98125	4293	6	240	1	0.33543	0.292047
Loss of facial adipose tissue	HP:0000292	2.98125	4293	6	240	1	0.33543	0.292047
Decreased lacrimation	HP:0000633	2.98125	4293	6	240	1	0.33543	0.292047
Esophageal ulceration	HP:0004791	2.98125	4293	6	240	1	0.33543	0.292047
Broad long bones	HP:0005622	2.98125	4293	6	240	1	0.33543	0.292047
Mild postnatal growth retardation	HP:0001530	2.98125	4293	6	240	1	0.33543	0.292047
Congenital hemolytic anemia	HP:0004804	2.98125	4293	6	240	1	0.33543	0.292047
Frontal cortical atrophy	HP:0006913	2.98125	4293	6	240	1	0.33543	0.292047
Thickened cortex of long bones	HP:0000935	2.98125	4293	6	240	1	0.33543	0.292047
Epigastric pain	HP:0410019	2.98125	4293	6	240	1	0.33543	0.292047
Abnormality of the philtrum	HP:0000288	2.98125	4293	6	240	1	0.33543	0.292047
Inappropriate crying	HP:0030215	2.98125	4293	6	240	1	0.33543	0.292047
Generalized hypopigmentation of hair	HP:0011358	2.98125	4293	6	240	1	0.33543	0.292047
Thickened ribs	HP:0000900	2.98125	4293	6	240	1	0.33543	0.292047
Abnormality of the nose	HP:0000366	2.98125	4293	6	240	1	0.33543	0.292047
Abnormal oral mucosa morphology	HP:0011830	2.98125	4293	6	240	1	0.33543	0.292047
Stomatocytosis	HP:0004446	2.98125	4293	12	240	2	0.67086	0.142118
Abnormal basal ganglia MRI signal intensity	HP:0012751	2.98125	4293	6	240	1	0.33543	0.292047
Hypoplasia of the musculature	HP:0009004	2.98125	4293	6	240	1	0.33543	0.292047
Absent/hypoplastic paranasal sinuses	HP:0005453	2.98125	4293	6	240	1	0.33543	0.292047
Progressive pulmonary function impairment	HP:0006520	2.98125	4293	6	240	1	0.33543	0.292047
Upper eyelid coloboma	HP:0000636	2.98125	4293	6	240	1	0.33543	0.292047
Chronic hemolytic anemia	HP:0004870	2.98125	4293	6	240	1	0.33543	0.292047
Premature coronary artery atherosclerosis	HP:0005181	2.75192	4293	13	240	2	0.726765	0.162045
Distal arthrogryposis	HP:0005684	2.75192	4293	13	240	2	0.726765	0.162045
Phthisis bulbi	HP:0000667	2.75192	4293	13	240	2	0.726765	0.162045
Vitiligo	HP:0001045	2.75192	4293	13	240	2	0.726765	0.162045
Subcutaneous hemorrhage	HP:0001933	2.75192	4293	13	240	2	0.726765	0.162045
Inflammation of the large intestine	HP:0002037	2.75192	4293	13	240	2	0.726765	0.162045
Enuresis	HP:0000805	2.75192	4293	13	240	2	0.726765	0.162045
Hydrocele testis	HP:0000034	2.75192	4293	13	240	2	0.726765	0.162045
Testicular atrophy	HP:0000029	2.75192	4293	13	240	2	0.726765	0.162045
Hypoplastic pelvis	HP:0008839	2.75192	4293	13	240	2	0.726765	0.162045
Aspiration	HP:0002835	2.75192	4293	13	240	2	0.726765	0.162045
Anomalous pulmonary venous return	HP:0010772	2.75192	4293	13	240	2	0.726765	0.162045
Ankylosis	HP:0031013	2.75192	4293	13	240	2	0.726765	0.162045
Pedal edema	HP:0010741	2.55536	4293	14	240	2	0.782669	0.182432
Abnormality of the diaphragm	HP:0000775	2.55536	4293	7	240	1	0.391335	0.331681
Duplication of phalanx of hallux	HP:0010066	2.55536	4293	7	240	1	0.391335	0.331681
Complete duplication of thumb phalanx	HP:0009943	2.55536	4293	7	240	1	0.391335	0.331681
EEG with irregular generalized spike and wave complexes	HP:0001326	2.55536	4293	7	240	1	0.391335	0.331681
Distal upper limb amyotrophy	HP:0007149	2.55536	4293	7	240	1	0.391335	0.331681
Incomprehensible speech	HP:0002546	2.55536	4293	7	240	1	0.391335	0.331681
Sagittal craniosynostosis	HP:0004442	2.55536	4293	14	240	2	0.782669	0.182432
Profound sensorineural hearing impairment	HP:0011476	2.55536	4293	7	240	1	0.391335	0.331681
Micrographia	HP:0031908	2.55536	4293	14	240	2	0.782669	0.182432
Substantia nigra gliosis	HP:0011960	2.55536	4293	14	240	2	0.782669	0.182432
Exudative vitreoretinopathy	HP:0030490	2.55536	4293	7	240	1	0.391335	0.331681
Intussusception	HP:0002576	2.55536	4293	7	240	1	0.391335	0.331681
Type II transferrin isoform profile	HP:0012301	2.55536	4293	7	240	1	0.391335	0.331681
Hypoplastic frontal sinuses	HP:0002738	2.55536	4293	7	240	1	0.391335	0.331681
Spondyloepimetaphyseal dysplasia	HP:0002651	2.55536	4293	14	240	2	0.782669	0.182432
Non-medullary thyroid carcinoma	HP:0040198	2.55536	4293	7	240	1	0.391335	0.331681
Atypical absence seizure	HP:0007270	2.55536	4293	14	240	2	0.782669	0.182432
Bifid epiglottis	HP:0010564	2.55536	4293	7	240	1	0.391335	0.331681
Testicular neoplasm	HP:0010788	2.55536	4293	7	240	1	0.391335	0.331681
Ovarian papillary adenocarcinoma	HP:0006774	2.55536	4293	7	240	1	0.391335	0.331681
Narrow internal auditory canal	HP:0011386	2.55536	4293	14	240	2	0.782669	0.182432
Abnormal subcutaneous fat tissue distribution	HP:0007552	2.55536	4293	7	240	1	0.391335	0.331681
Venous malformation	HP:0012721	2.55536	4293	7	240	1	0.391335	0.331681
Retinal nonattachment	HP:0007899	2.55536	4293	7	240	1	0.391335	0.331681
Proximal renal tubular acidosis	HP:0002049	2.55536	4293	7	240	1	0.391335	0.331681
Scissor gait	HP:0012407	2.55536	4293	7	240	1	0.391335	0.331681
Spontaneous hemolytic crises	HP:0005525	2.55536	4293	7	240	1	0.391335	0.331681
Maculopapular exanthema	HP:0040186	2.55536	4293	7	240	1	0.391335	0.331681
Adrenocortical carcinoma	HP:0006744	2.55536	4293	14	240	2	0.782669	0.182432
Absent axillary hair	HP:0002221	2.55536	4293	7	240	1	0.391335	0.331681
Rheumatoid factor positive	HP:0002923	2.55536	4293	7	240	1	0.391335	0.331681
Burkitt lymphoma	HP:0030080	2.55536	4293	7	240	1	0.391335	0.331681
T-cell lymphoma	HP:0012190	2.55536	4293	7	240	1	0.391335	0.331681
Uni- and bilateral multifocal epileptiform discharges	HP:0011190	2.55536	4293	14	240	2	0.782669	0.182432
Myoclonic absence	HP:0011150	2.55536	4293	7	240	1	0.391335	0.331681
Limb myoclonus	HP:0045084	2.55536	4293	14	240	2	0.782669	0.182432
Uncontrolled eye movements	HP:0007738	2.55536	4293	7	240	1	0.391335	0.331681
Short distal phalanx of the thumb	HP:0009650	2.55536	4293	7	240	1	0.391335	0.331681
Elevated alpha-fetoprotein	HP:0006254	2.55536	4293	14	240	2	0.782669	0.182432
Abnormality of skin morphology	HP:0011121	2.55536	4293	14	240	2	0.782669	0.182432
Gingival fibromatosis	HP:0000169	2.55536	4293	14	240	2	0.782669	0.182432
Right ventricular failure	HP:0001708	2.55536	4293	7	240	1	0.391335	0.331681
Enlarged pituitary gland	HP:0012505	2.55536	4293	7	240	1	0.391335	0.331681
Progressive visual field defects	HP:0007987	2.55536	4293	7	240	1	0.391335	0.331681
Cardiorespiratory arrest	HP:0006543	2.55536	4293	7	240	1	0.391335	0.331681
Fasting hypoglycemia	HP:0003162	2.55536	4293	14	240	2	0.782669	0.182432
Thenar muscle atrophy	HP:0003393	2.55536	4293	7	240	1	0.391335	0.331681
Limb-girdle muscle atrophy	HP:0003797	2.55536	4293	7	240	1	0.391335	0.331681
Spinal cord lesion	HP:0100561	2.55536	4293	7	240	1	0.391335	0.331681
Lymphoproliferative disorder	HP:0005523	2.55536	4293	7	240	1	0.391335	0.331681
Lacrimal duct stenosis	HP:0007678	2.55536	4293	7	240	1	0.391335	0.331681
Angiofibromas	HP:0010615	2.55536	4293	7	240	1	0.391335	0.331681
Renal cortical cysts	HP:0000803	2.55536	4293	14	240	2	0.782669	0.182432
Neoplasm of the adrenal cortex	HP:0100641	2.55536	4293	7	240	1	0.391335	0.331681
Hypoplastic iris stroma	HP:0007990	2.55536	4293	7	240	1	0.391335	0.331681
Hypermetric saccades	HP:0007338	2.55536	4293	7	240	1	0.391335	0.331681
Atrophy of the spinal cord	HP:0006827	2.55536	4293	7	240	1	0.391335	0.331681
Hemeralopia	HP:0012047	2.55536	4293	7	240	1	0.391335	0.331681
Diaphyseal thickening	HP:0005019	2.55536	4293	14	240	2	0.782669	0.182432
Delirium	HP:0031258	2.55536	4293	7	240	1	0.391335	0.331681
Decreased methionine synthase activity	HP:0003524	2.55536	4293	7	240	1	0.391335	0.331681
Visual agnosia	HP:0030222	2.55536	4293	7	240	1	0.391335	0.331681
Anomia	HP:0030784	2.55536	4293	7	240	1	0.391335	0.331681
Mitral atresia	HP:0011560	2.55536	4293	7	240	1	0.391335	0.331681
Square face	HP:0000321	2.55536	4293	7	240	1	0.391335	0.331681
Reticular hyperpigmentation	HP:0007588	2.55536	4293	7	240	1	0.391335	0.331681
Advanced ossification of carpal bones	HP:0004233	2.55536	4293	7	240	1	0.391335	0.331681
Vestibular hypofunction	HP:0001756	2.55536	4293	14	240	2	0.782669	0.182432
Olfactory lobe agenesis	HP:0001341	2.55536	4293	7	240	1	0.391335	0.331681
Heparan sulfate excretion in urine	HP:0002159	2.55536	4293	7	240	1	0.391335	0.331681
Renal neoplasm	HP:0009726	2.55536	4293	7	240	1	0.391335	0.331681
Abnormality of calvarial morphology	HP:0002648	2.55536	4293	7	240	1	0.391335	0.331681
Esophageal neoplasm	HP:0100751	2.55536	4293	7	240	1	0.391335	0.331681
Hypoproteinemia	HP:0003075	2.385	4293	15	240	2	0.838574	0.203166
Enlarged cisterna magna	HP:0002280	2.385	4293	15	240	2	0.838574	0.203166
Limb joint contracture	HP:0003121	2.385	4293	15	240	2	0.838574	0.203166
Limb-girdle muscular dystrophy	HP:0006785	2.385	4293	15	240	2	0.838574	0.203166
Melena	HP:0002249	2.385	4293	15	240	2	0.838574	0.203166
Calcification of the aorta	HP:0004963	2.385	4293	15	240	2	0.838574	0.203166
Short 5th finger	HP:0009237	2.385	4293	15	240	2	0.838574	0.203166
Irregular epiphyses	HP:0010582	2.385	4293	15	240	2	0.838574	0.203166
Exercise-induced muscle fatigue	HP:0009020	2.385	4293	15	240	2	0.838574	0.203166
Elevated levels of phytanic acid	HP:0010571	2.385	4293	15	240	2	0.838574	0.203166
Carcinoma	HP:0030731	2.385	4293	15	240	2	0.838574	0.203166
Papilledema	HP:0001085	2.385	4293	15	240	2	0.838574	0.203166
Preaxial foot polydactyly	HP:0001841	2.385	4293	15	240	2	0.838574	0.203166
Absent thumbnail	HP:0012554	2.385	4293	15	240	2	0.838574	0.203166
Abnormally large globe	HP:0001090	2.385	4293	15	240	2	0.838574	0.203166
Impaired visuospatial constructive cognition	HP:0010794	2.385	4293	15	240	2	0.838574	0.203166
Abnormality of bone marrow cell morphology	HP:0005561	2.385	4293	15	240	2	0.838574	0.203166
Osteoporosis of vertebrae	HP:0005625	2.385	4293	15	240	2	0.838574	0.203166
Fused cervical vertebrae	HP:0002949	2.385	4293	15	240	2	0.838574	0.203166
Abnormal cochlea morphology	HP:0000375	2.385	4293	15	240	2	0.838574	0.203166
Impaired temperature sensation	HP:0010829	2.23594	4293	8	240	1	0.44724	0.369104
Abnormality of the abdominal wall	HP:0004298	2.23594	4293	16	240	2	0.894479	0.224145
Slender finger	HP:0001238	2.23594	4293	16	240	2	0.894479	0.224145
Aplasia/Hypoplasia of the breasts	HP:0010311	2.23594	4293	16	240	2	0.894479	0.224145
Tics	HP:0100033	2.23594	4293	8	240	1	0.44724	0.369104
Neoplasm of the breast	HP:0100013	2.23594	4293	16	240	2	0.894479	0.224145
Short stepped shuffling gait	HP:0007311	2.23594	4293	16	240	2	0.894479	0.224145
Hypermethioninemia	HP:0003235	2.23594	4293	8	240	1	0.44724	0.369104
Knee dislocation	HP:0004976	2.23594	4293	8	240	1	0.44724	0.369104
Talipes calcaneovalgus	HP:0001884	2.23594	4293	8	240	1	0.44724	0.369104
Dysgerminoma	HP:0100621	2.23594	4293	8	240	1	0.44724	0.369104
Skin tags	HP:0010609	2.23594	4293	16	240	2	0.894479	0.224145
Generalized hyperkeratosis	HP:0005595	2.23594	4293	16	240	2	0.894479	0.224145
Mucosal telangiectasiae	HP:0100579	2.23594	4293	16	240	2	0.894479	0.224145
Abnormality of peripheral nerve conduction	HP:0003134	2.23594	4293	8	240	1	0.44724	0.369104
Abnormality of earlobe	HP:0000363	2.23594	4293	8	240	1	0.44724	0.369104
Midline notch of upper alveolar ridge	HP:0009084	2.23594	4293	8	240	1	0.44724	0.369104
Non-midline cleft lip	HP:0100335	2.23594	4293	16	240	2	0.894479	0.224145
Periventricular heterotopia	HP:0007165	2.23594	4293	16	240	2	0.894479	0.224145
Prominent sternum	HP:0000884	2.23594	4293	8	240	1	0.44724	0.369104
Small cerebral cortex	HP:0002472	2.23594	4293	8	240	1	0.44724	0.369104
Portal vein thrombosis	HP:0030242	2.23594	4293	8	240	1	0.44724	0.369104
Congenital blindness	HP:0007875	2.23594	4293	8	240	1	0.44724	0.369104
Lower limb amyotrophy	HP:0007210	2.23594	4293	16	240	2	0.894479	0.224145
Acral ulceration	HP:0006121	2.23594	4293	8	240	1	0.44724	0.369104
Abnormally ossified vertebrae	HP:0100569	2.23594	4293	8	240	1	0.44724	0.369104
Macular hypoplasia	HP:0001104	2.23594	4293	8	240	1	0.44724	0.369104
Narrow pelvis bone	HP:0003275	2.23594	4293	8	240	1	0.44724	0.369104
Short 5th metacarpal	HP:0010047	2.23594	4293	8	240	1	0.44724	0.369104
Refractory anemia	HP:0005505	2.23594	4293	8	240	1	0.44724	0.369104
Epicanthus inversus	HP:0000537	2.23594	4293	8	240	1	0.44724	0.369104
Female infertility	HP:0008222	2.23594	4293	8	240	1	0.44724	0.369104
Optic nerve dysplasia	HP:0001093	2.23594	4293	8	240	1	0.44724	0.369104
Upper limb postural tremor	HP:0007351	2.23594	4293	8	240	1	0.44724	0.369104
Genetic anticipation	HP:0003743	2.23594	4293	8	240	1	0.44724	0.369104
Fatty replacement of skeletal muscle	HP:0012548	2.23594	4293	16	240	2	0.894479	0.224145
Menstrual irregularities	HP:0000858	2.23594	4293	8	240	1	0.44724	0.369104
Adrenocorticotropic hormone deficiency	HP:0011748	2.23594	4293	8	240	1	0.44724	0.369104
Low hanging columella	HP:0009765	2.23594	4293	16	240	2	0.894479	0.224145
Fatigable weakness of skeletal muscles	HP:0030197	2.23594	4293	8	240	1	0.44724	0.369104
Confetti-like hypopigmented macules	HP:0007449	2.23594	4293	8	240	1	0.44724	0.369104
Increased urinary cortisol level	HP:0012030	2.23594	4293	8	240	1	0.44724	0.369104
Choroideremia	HP:0001139	2.23594	4293	8	240	1	0.44724	0.369104
Axillary pterygium	HP:0001060	2.23594	4293	8	240	1	0.44724	0.369104
Abnormal leukocyte morphology	HP:0001881	2.23594	4293	8	240	1	0.44724	0.369104
Hand oligodactyly	HP:0001180	2.23594	4293	8	240	1	0.44724	0.369104
Shagreen patch	HP:0009721	2.23594	4293	8	240	1	0.44724	0.369104
Congenital muscular torticollis	HP:0005988	2.23594	4293	8	240	1	0.44724	0.369104
Digenic inheritance	HP:0010984	2.23594	4293	8	240	1	0.44724	0.369104
Premature thelarche	HP:0010314	2.23594	4293	8	240	1	0.44724	0.369104
Decreased methylcobalamin	HP:0003223	2.23594	4293	8	240	1	0.44724	0.369104
Alexia	HP:0010523	2.23594	4293	8	240	1	0.44724	0.369104
Spoken Word Recognition Deficit	HP:0030391	2.23594	4293	8	240	1	0.44724	0.369104
Reticulated skin pigmentation	HP:0007427	2.23594	4293	8	240	1	0.44724	0.369104
Abnormality of the genitourinary system	HP:0000119	2.23594	4293	8	240	1	0.44724	0.369104
Pulmonary edema	HP:0100598	2.23594	4293	8	240	1	0.44724	0.369104
Abnormality of the Achilles tendon	HP:0005109	2.23594	4293	8	240	1	0.44724	0.369104
Ulcerative colitis	HP:0100279	2.23594	4293	8	240	1	0.44724	0.369104
Decreased serum insulin-like growth factor 1	HP:0030353	2.23594	4293	8	240	1	0.44724	0.369104
Red hair	HP:0002297	2.23594	4293	8	240	1	0.44724	0.369104
Neoplasm of the small intestine	HP:0100833	2.23594	4293	8	240	1	0.44724	0.369104
Radial bowing	HP:0002986	2.10441	4293	17	240	2	0.950384	0.245278
Narrow nose	HP:0000460	2.10441	4293	17	240	2	0.950384	0.245278
Obsessive-compulsive trait	HP:0008770	2.10441	4293	17	240	2	0.950384	0.245278
Alcoholism	HP:0030955	2.10441	4293	17	240	2	0.950384	0.245278
Neoplasm of the nervous system	HP:0004375	2.10441	4293	17	240	2	0.950384	0.245278
Female external genitalia in individual with 46,XY karyotype	HP:0008730	2.10441	4293	17	240	2	0.950384	0.245278
Colonic diverticula	HP:0002253	2.10441	4293	17	240	2	0.950384	0.245278
Hypercoagulability	HP:0100724	2.10441	4293	17	240	2	0.950384	0.245278
Abnormal sacrum morphology	HP:0005107	2.10441	4293	17	240	2	0.950384	0.245278
Hearing abnormality	HP:0000364	2.10441	4293	17	240	2	0.950384	0.245278
Thyroid carcinoma	HP:0002890	2.10441	4293	17	240	2	0.950384	0.245278
Dysesthesia	HP:0012534	2.10441	4293	17	240	2	0.950384	0.245278
Gastrointestinal stroma tumor	HP:0100723	2.10441	4293	17	240	2	0.950384	0.245278
Calf muscle pseudohypertrophy	HP:0003707	2.10441	4293	17	240	2	0.950384	0.245278
Chronic myelogenous leukemia	HP:0005506	1.9875	4293	9	240	1	0.503145	0.40444
Diastema	HP:0000699	1.9875	4293	9	240	1	0.503145	0.40444
Upper limb asymmetry	HP:0100560	1.9875	4293	9	240	1	0.503145	0.40444
Saccadic smooth pursuit	HP:0001152	1.9875	4293	18	240	2	1.00629	0.266482
Long thorax	HP:0100818	1.9875	4293	9	240	1	0.503145	0.40444
Microcolon	HP:0004388	1.9875	4293	9	240	1	0.503145	0.40444
Hematemesis	HP:0002248	1.9875	4293	9	240	1	0.503145	0.40444
Limited hip movement	HP:0008800	1.9875	4293	9	240	1	0.503145	0.40444
Subacute progressive viral hepatitis	HP:0006572	1.9875	4293	9	240	1	0.503145	0.40444
Colorectal polyposis	HP:0200063	1.9875	4293	18	240	2	1.00629	0.266482
Abnormality of refraction	HP:0000539	1.9875	4293	9	240	1	0.503145	0.40444
Excessive salivation	HP:0003781	1.9875	4293	9	240	1	0.503145	0.40444
Insidious onset	HP:0003587	1.9875	4293	18	240	2	1.00629	0.266482
Generalized clonic seizures	HP:0011169	1.9875	4293	18	240	2	1.00629	0.266482
Calcium oxalate nephrolithiasis	HP:0008672	1.9875	4293	9	240	1	0.503145	0.40444
Acidosis	HP:0001941	1.9875	4293	9	240	1	0.503145	0.40444
Absent or minimally ossified vertebral bodies	HP:0004599	1.9875	4293	9	240	1	0.503145	0.40444
Progressive extrapyramidal movement disorder	HP:0007153	1.9875	4293	9	240	1	0.503145	0.40444
Thick nasal alae	HP:0009928	1.9875	4293	18	240	2	1.00629	0.266482
Nail pits	HP:0001803	1.9875	4293	9	240	1	0.503145	0.40444
Central Y-shaped metacarpal	HP:0006145	1.9875	4293	9	240	1	0.503145	0.40444
Hypoplasia of olfactory tract	HP:0007036	1.9875	4293	9	240	1	0.503145	0.40444
Mesoaxial polydactyly	HP:0100260	1.9875	4293	9	240	1	0.503145	0.40444
Adrenocortical adenoma	HP:0008256	1.9875	4293	9	240	1	0.503145	0.40444
Conical tooth	HP:0000698	1.9875	4293	18	240	2	1.00629	0.266482
Head tremor	HP:0002346	1.9875	4293	18	240	2	1.00629	0.266482
Female pseudohermaphroditism	HP:0010458	1.9875	4293	9	240	1	0.503145	0.40444
Ulnar claw	HP:0001178	1.9875	4293	9	240	1	0.503145	0.40444
Hemoglobinuria	HP:0003641	1.9875	4293	9	240	1	0.503145	0.40444
EEG with burst suppression	HP:0010851	1.9875	4293	18	240	2	1.00629	0.266482
Abnormality of the vertebral column	HP:0000925	1.9875	4293	18	240	2	1.00629	0.266482
Broad eyebrow	HP:0011229	1.9875	4293	9	240	1	0.503145	0.40444
Abnormal hemoglobin	HP:0011902	1.9875	4293	9	240	1	0.503145	0.40444
Impaired distal vibration sensation	HP:0006886	1.9875	4293	9	240	1	0.503145	0.40444
Gaze-evoked horizontal nystagmus	HP:0007979	1.9875	4293	9	240	1	0.503145	0.40444
Abnormal prolactin level	HP:0040086	1.9875	4293	9	240	1	0.503145	0.40444
Uterine neoplasm	HP:0010784	1.9875	4293	9	240	1	0.503145	0.40444
Bitemporal hemianopia	HP:0030521	1.9875	4293	9	240	1	0.503145	0.40444
Emotional blunting	HP:0030213	1.9875	4293	9	240	1	0.503145	0.40444
Abulia	HP:0012671	1.9875	4293	9	240	1	0.503145	0.40444
EEG with continuous slow activity	HP:0011204	1.9875	4293	9	240	1	0.503145	0.40444
Peptic ulcer	HP:0004398	1.9875	4293	18	240	2	1.00629	0.266482
Contractures involving the joints of the feet	HP:0008366	1.9875	4293	9	240	1	0.503145	0.40444
Pustule	HP:0200039	1.9875	4293	18	240	2	1.00629	0.266482
Posterior helix pit	HP:0008523	1.9875	4293	9	240	1	0.503145	0.40444
Camptodactyly of toe	HP:0001836	1.9875	4293	9	240	1	0.503145	0.40444
Concave nasal ridge	HP:0011120	1.9875	4293	9	240	1	0.503145	0.40444
Upper limb amyotrophy	HP:0009129	1.9875	4293	9	240	1	0.503145	0.40444
Calcaneovalgus deformity	HP:0001848	1.9875	4293	9	240	1	0.503145	0.40444
Tongue atrophy	HP:0012473	1.9875	4293	9	240	1	0.503145	0.40444
Abnormality of the adrenal glands	HP:0000834	1.9875	4293	9	240	1	0.503145	0.40444
Parietal foramina	HP:0002697	1.9875	4293	9	240	1	0.503145	0.40444
Hypouricemia	HP:0003537	1.9875	4293	9	240	1	0.503145	0.40444
Grammar-specific speech disorder	HP:0006977	1.9875	4293	9	240	1	0.503145	0.40444
Interstitial pneumonitis	HP:0006515	1.9875	4293	9	240	1	0.503145	0.40444
Clinodactyly of the 5th toe	HP:0001864	1.9875	4293	9	240	1	0.503145	0.40444
Persistence of hemoglobin F	HP:0011904	1.9875	4293	9	240	1	0.503145	0.40444
Neonatal hyperbilirubinemia	HP:0003265	1.9875	4293	9	240	1	0.503145	0.40444
Neurofibromas	HP:0001067	1.9875	4293	9	240	1	0.503145	0.40444
Partial albinism	HP:0007443	1.9875	4293	9	240	1	0.503145	0.40444
Oligodactyly	HP:0012165	1.88289	4293	19	240	2	1.06219	0.287683
Abnormal myocardium morphology	HP:0001637	1.88289	4293	19	240	2	1.06219	0.287683
Orofacial dyskinesia	HP:0002310	1.88289	4293	19	240	2	1.06219	0.287683
Micronodular cirrhosis	HP:0001413	1.88289	4293	19	240	2	1.06219	0.287683
Lipoma	HP:0012032	1.88289	4293	19	240	2	1.06219	0.287683
Papilloma	HP:0012740	1.88289	4293	19	240	2	1.06219	0.287683
Hypoglycemic seizures	HP:0002173	1.88289	4293	19	240	2	1.06219	0.287683
[truncated: 5,731 more rows]

## Sheet: supplementary file 6c
Supplementary Table 6. Gene ORGANizer terms enriched within genes associated with modern human-derived fixed variants.
Body Part	Enrichment	Observed	Expected	P-value	FDR
chin	1.47093	50	33.992	0.00146842	0.177679
cheek	1.53745	30	19.5129	0.00747056	0.451969
pituitary gland	0.980555	32	32.6346	0.542257	0.991568
ovary	0.912941	30	32.8608	0.708403	0.991568
uterus	0.761159	35	45.9825	0.974214	0.991568
breast	1.04546	34	32.5215	0.378696	0.991568
brain	1.04119	159	152.71	0.120549	0.991568
head	1.00811	169	167.641	0.388203	0.991568
skull	1.01635	106	104.295	0.400358	0.991568
testicle	0.948618	47	49.5458	0.663183	0.991568
penis	0.895546	35	39.0823	0.771429	0.991568
vagina	0.763615	26	34.0486	0.944023	0.991568
vulva	0.715401	21	29.3542	0.961173	0.991568
skin	0.946287	114	120.471	0.840369	0.991568
hair	1.02875	59	57.3509	0.391327	0.991568
prostate	0.738157	21	28.4492	0.943567	0.991568
eye	1.01228	118	116.568	0.41556	0.991568
kidney	0.839179	58	69.1152	0.958371	0.991568
finger	1.03227	86	83.3115	0.342757	0.991568
hand	0.980421	89	90.7773	0.603835	0.991568
digit	1.02496	88	85.8567	0.373742	0.991568
upper limb	0.946821	95	100.336	0.786429	0.991568
toe	0.949378	77	81.1057	0.730659	0.991568
foot	0.933351	88	94.284	0.824758	0.991568
lower limb	0.896775	95	105.935	0.94861	0.991568
rectum	0.848313	19	22.3974	0.779767	0.991568
mouth	1.0376	100	96.3767	0.295262	0.991568
ureter	0.807902	26	32.1821	0.89169	0.991568
tooth	1.12975	40	35.406	0.189176	0.991568
mandible	1.1161	82	73.4702	0.0969534	0.991568
maxilla	1.13495	83	73.1309	0.066516	0.991568
jaw	1.12279	83	73.9227	0.0837555	0.991568
heart	0.888233	74	83.3115	0.918951	0.991568
cranial nerve	1.12967	86	76.1285	0.0677376	0.991568
urethra	1.01724	21	20.6441	0.455461	0.991568
lung	0.796177	58	72.8481	0.989206	0.991568
urinary bladder	0.77575	24	30.9378	0.92185	0.991568
nose	1.1501	67	58.2558	0.0804496	0.991568
face	1.08404	100	92.2479	0.124586	0.991568
anus	1.09044	14	12.8389	0.354179	0.991568
peripheral nerve	0.798222	60	75.167	0.990137	0.991568
peripheral nervous system	0.882838	74	83.8206	0.929751	0.991568
blood vessel	0.948659	80	84.3296	0.740878	0.991568
pancreas	0.815164	29	35.5757	0.89689	0.991568
bronchus	0.55687	8	14.366	0.96979	0.991568
white blood cell	0.784975	42	53.5049	0.973456	0.991568
blood	0.824144	75	91.0036	0.991568	0.991568
liver	0.83292	44	52.8262	0.930416	0.991568
biliary tract	0.858978	12	13.9701	0.703033	0.991568
gallbladder	0.570343	4	7.01333	0.884819	0.991568
cerebellum	0.928565	49	52.7696	0.732044	0.991568
intestine	1.0034	58	57.8034	0.483588	0.991568
large intestine	0.891286	43	48.2449	0.814216	0.991568
spinal column	1.02632	66	64.3077	0.39248	0.991568
neck	0.859195	64	74.4883	0.945877	0.991568
femur	1.01143	52	51.4122	0.456366	0.991568
hip	0.956148	59	61.706	0.663771	0.991568
pelvis	1.07347	68	63.3462	0.230389	0.991568
thigh	0.976231	54	55.3148	0.581383	0.991568
red blood cell	0.752884	31	41.175	0.96975	0.991568
coagulation system	0.758825	30	39.5348	0.962714	0.991568
ear	1.15208	75	65.0995	0.0615203	0.991568
eyelid	1.08133	57	52.7131	0.236609	0.991568
outer ear	1.23299	53	42.9849	0.0398754	0.991568
forehead	1.19557	52	43.4939	0.0682123	0.991568
nail	0.936474	25	26.6959	0.633945	0.991568
radius	1.01565	49	48.2449	0.443874	0.991568
forearm	0.98436	52	52.8262	0.550265	0.991568
arm	1.01083	57	56.3894	0.456578	0.991568
ulna	0.996092	48	48.1883	0.507865	0.991568
humerus	1.0376	50	48.1883	0.374213	0.991568
tibia	1.04129	49	47.0572	0.364709	0.991568
fibula	1.01712	47	46.2088	0.440399	0.991568
clavicle	1.03137	49	47.5096	0.394494	0.991568
shin	0.976936	51	52.204	0.575261	0.991568
ankle	0.946885	58	61.2535	0.695429	0.991568
knee	0.96055	59	61.4232	0.647274	0.991568
wrist	0.955257	57	59.6698	0.662883	0.991568
elbow	1.01843	61	59.8961	0.426568	0.991568
shoulder	0.973246	60	61.6494	0.600305	0.991568
vertebrae	1.0458	64	61.1969	0.325395	0.991568
rib	0.97562	49	50.2245	0.577335	0.991568
rib cage	0.97562	49	50.2245	0.577335	0.991568
sternum	0.959091	46	47.9621	0.627229	0.991568
chest wall	1.0119	55	54.3533	0.453557	0.991568
scapula	1.0295	46	44.6817	0.403629	0.991568
lip	1.1453	48	41.9103	0.137974	0.991568
middle ear	0.819971	16	19.5129	0.802465	0.991568
fallopian tube	0.578338	7	12.1036	0.946453	0.991568
vas deferens	0.562565	7	12.443	0.955923	0.991568
bone marrow	0.589354	13	22.058	0.986395	0.991568
spinal cord	0.795708	50	62.8371	0.980198	0.991568
meninges	0.83292	22	26.4131	0.827675	0.991568
cerebrospinal fluid	0.761627	14	18.3817	0.865706	0.991568
spleen	0.954678	25	26.1869	0.592454	0.991568
lymph node	0.750593	9	11.9905	0.816535	0.991568
diaphragm	0.626973	10	15.9497	0.950491	0.991568
abdominal wall	0.958588	27	28.1664	0.588289	0.991568
aorta	0.880363	12	13.6307	0.669448	0.991568
tongue	0.881277	16	18.1555	0.699034	0.991568
larynx	0.766762	17	22.1712	0.886509	0.991568
pharynx	1.00079	27	26.9787	0.489252	0.991568
vocal cord	0.867352	13	14.9882	0.698921	0.991568
sinus	0.760457	4	5.25999	0.697307	0.991568
small intestine	0.977321	44	45.021	0.565623	0.991568
duodenum	0.99934	13	13.0086	0.486279	0.991568
stomach	0.902491	44	48.7539	0.78959	0.991568
esophagus	0.917847	38	41.4012	0.726697	0.991568
placenta	0.713568	9	12.6127	0.86001	0.991568
trachea	0.916773	14	15.271	0.623961	0.991568
epiglottis	0.937609	7	7.4658	0.550294	0.991568
lymph vessel	0.77717	4	5.14688	0.680123	0.991568
heart valve	1.20228	17	14.1398	0.206513	0.991568
scalp	0.872139	11	12.6127	0.673205	0.991568
inner ear	1.20746	14	11.5946	0.22374	0.991568
adrenal gland	0.823632	15	18.212	0.787594	0.991568
sweat gland	0.96029	17	17.703	0.559392	0.991568
thyroid	0.746018	10	13.4045	0.837188	0.991568
hypothalamus	0.936033	9	9.61504	0.565125	0.991568
salivary gland	1.1632	10	8.59698	0.297735	0.991568
lacrimal apparatus	0.940459	5	5.31655	0.532051	0.991568
appendix	1.2055	3	2.4886	0.346768
parathyroid	0.707225	2	2.82795	0.664498
thymus	1.10504	3	2.71484	0.401481
olfactory bulb	1.211	5	4.12881	0.313299
